# Supplementary material for: Untargeted mass spectrometry to investigate ocean acidification in Cancer borealis using optimized metabolite extraction methods
Source: Royal Society of Chemistry journal article supplement (doi:10.1039/d5an00788g), 2026-01-01
Supplement: d5an00788g2.xlsx [file d5an00788g2.xlsx]

## Sheet: Table S1
Table S1 The complete list of classified metabolites in IPA control group.
HMDB ID	Name	Super Class	Class	Subclass
HMDB0251295	Dihydrochelerythrine	Alkaloids and derivatives	Benzophenanthridine alkaloids	Dihydrobenzophenanthridine alkaloids
HMDB0304704	lupinine	Alkaloids and derivatives	Lupin alkaloids	Sparteine, lupanine, and related alkaloids
HMDB0000875	Trigonelline	Alkaloids and derivatives
HMDB0004350	Anabasine	Alkaloids and derivatives
HMDB0033439	(-)-alpha-Narcotine	Alkaloids and derivatives	Phthalide isoquinolines
HMDB0035196	Harman	Alkaloids and derivatives	Harmala alkaloids
HMDB0246391	4-Chloroaniline	Benzenoids	Benzene and substituted derivatives	Aniline and substituted anilines
HMDB0014839	Amprenavir	Benzenoids	Benzene and substituted derivatives	Benzenesulfonamides
HMDB0304940	2-Aminobenzenesulfonic acid	Benzenoids	Benzene and substituted derivatives	Benzenesulfonic acids and derivatives
HMDB0001867	4-Aminohippuric acid	Benzenoids	Benzene and substituted derivatives	Benzoic acids and derivatives
HMDB0014750	Bisoprolol	Benzenoids	Benzene and substituted derivatives	Benzylethers
HMDB0005030	Fexofenadine	Benzenoids	Benzene and substituted derivatives	Diphenylmethanes
HMDB0014354	Trospium	Benzenoids	Benzene and substituted derivatives	Diphenylmethanes
HMDB0304759	p,p'-DDE	Benzenoids	Benzene and substituted derivatives	Diphenylmethanes
HMDB0015309	Chlormezanone	Benzenoids	Benzene and substituted derivatives	Halobenzenes
HMDB0015352	Ketamine	Benzenoids	Benzene and substituted derivatives	Halobenzenes
HMDB0000121	Folic acid	Benzenoids	Phenols	Methoxyphenols
HMDB0002227	Capsaicin	Benzenoids	Phenols	Methoxyphenols
HMDB0038457	Dihydrocapsaicin	Benzenoids	Phenols	Methoxyphenols
HMDB0000306	Tyramine	Benzenoids	Benzene and substituted derivatives	Phenethylamines
HMDB0001850	Verapamil	Benzenoids	Benzene and substituted derivatives	Phenylbutylamines
HMDB0034240	Styrene	Benzenoids	Benzene and substituted derivatives	Styrenes
HMDB0014615	Fluoxetine	Benzenoids	Benzene and substituted derivatives	Trifluoromethylbenzenes
HMDB0060677	2,6-Dimethylaniline	Benzenoids	Benzene and substituted derivatives	Xylenes
HMDB0014680	Nortriptyline	Benzenoids	Dibenzocycloheptenes
HMDB0032619	1-Phenylethanol	Benzenoids	Benzene and substituted derivatives
HMDB0033945	2-Phenylethyl acetate	Benzenoids	Benzene and substituted derivatives
HMDB0060390	4-Hydroxyphenyl acetate	Benzenoids	Phenol esters
HMDB0248970	Benzamidine	Benzenoids	Benzene and substituted derivatives
HMDB0038953	Fragransin B2	Lignans, neolignans and related compounds	Furanoid lignans	Tetrahydrofuran lignans
HMDB0030828	2-(4-Allyl-2,6-dimethoxyphenoxy)-1-(3,4,5-trimethoxyphenyl)-1-propanol	Lignans, neolignans and related compounds
HMDB0004634	4-Chloromethandienone	Lipids and lipid-like molecules	Steroids and steroid derivatives	Androstane steroids
HMDB0000361	3b,7a-Dihydroxy-5b-cholanoic acid	Lipids and lipid-like molecules	Steroids and steroid derivatives	Bile acids, alcohols and derivatives
HMDB0000713	Isoallolithocholic acid	Lipids and lipid-like molecules	Steroids and steroid derivatives	Bile acids, alcohols and derivatives
HMDB0001231	27-Deoxy-5b-cyprinol	Lipids and lipid-like molecules	Steroids and steroid derivatives	Bile acids, alcohols and derivatives
HMDB0001496	7alpha-Hydroxycholesterol	Lipids and lipid-like molecules	Steroids and steroid derivatives	Cholestane steroids
HMDB0001993	7a-Hydroxy-cholestene-3-one	Lipids and lipid-like molecules	Steroids and steroid derivatives	Cholestane steroids
HMDB0002394	Cholesta-4,6-dien-3-one	Lipids and lipid-like molecules	Steroids and steroid derivatives	Cholestane steroids
HMDB0007218	DG(18:1(9Z)/18:1(9Z)/0:0)	Lipids and lipid-like molecules	Glycerolipids	Diradylglycerols
HMDB0242173	Diacylglycerol	Lipids and lipid-like molecules	Glycerolipids	Diradylglycerols
HMDB0000222	Palmitoylcarnitine	Lipids and lipid-like molecules	Fatty Acyls	Fatty acid esters
HMDB0000756	Hexanoylcarnitine	Lipids and lipid-like molecules	Fatty Acyls	Fatty acid esters
HMDB0000791	Octanoylcarnitine	Lipids and lipid-like molecules	Fatty Acyls	Fatty acid esters
HMDB0005065	Oleoylcarnitine	Lipids and lipid-like molecules	Fatty Acyls	Fatty acid esters
HMDB0240773	DL-Acetylcarnitine	Lipids and lipid-like molecules	Fatty Acyls	Fatty acid esters
HMDB0240774	L-Palmitoylcarnitine	Lipids and lipid-like molecules	Fatty Acyls	Fatty acid esters
HMDB0240783	O-Palmitoylcarnitine	Lipids and lipid-like molecules	Fatty Acyls	Fatty acid esters
HMDB0000039	Butyric acid	Lipids and lipid-like molecules	Fatty Acyls	Fatty acids and conjugates
HMDB0000207	Oleic acid	Lipids and lipid-like molecules	Fatty Acyls	Fatty acids and conjugates
HMDB0000827	Stearic acid	Lipids and lipid-like molecules	Fatty Acyls	Fatty acids and conjugates
HMDB0001043	Arachidonic acid	Lipids and lipid-like molecules	Fatty Acyls	Fatty acids and conjugates
HMDB0002368	Nervonic acid	Lipids and lipid-like molecules	Fatty Acyls	Fatty acids and conjugates
HMDB0031068	Isopalmitic acid	Lipids and lipid-like molecules	Fatty Acyls	Fatty acids and conjugates
HMDB0000086	Glycerophosphocholine	Lipids and lipid-like molecules	Glycerophospholipids	Glycerophosphocholines
HMDB0002815	LysoPC(18:1(9Z)/0:0)	Lipids and lipid-like molecules	Glycerophospholipids	Glycerophosphocholines
HMDB0007972	PC(16:0/18:1(9Z))	Lipids and lipid-like molecules	Glycerophospholipids	Glycerophosphocholines
HMDB0007982	PC(16:0/20:4(5Z,8Z,11Z,14Z))	Lipids and lipid-like molecules	Glycerophospholipids	Glycerophosphocholines
HMDB0008038	PC(18:0/18:1(9Z))	Lipids and lipid-like molecules	Glycerophospholipids	Glycerophosphocholines
HMDB0010382	LysoPC(16:0/0:0)	Lipids and lipid-like molecules	Glycerophospholipids	Glycerophosphocholines
HMDB0244096	1,2-Distearoyllecithin	Lipids and lipid-like molecules	Glycerophospholipids	Glycerophosphocholines
HMDB0008890	PE(15:0/16:0)	Lipids and lipid-like molecules	Glycerophospholipids	Glycerophosphoethanolamines
HMDB0008928	PE(16:0/18:2(9Z,12Z))	Lipids and lipid-like molecules	Glycerophospholipids	Glycerophosphoethanolamines
HMDB0008993	PE(18:0/18:1(9Z))	Lipids and lipid-like molecules	Glycerophospholipids	Glycerophosphoethanolamines
HMDB0009485	PE(22:0/16:1(9Z))	Lipids and lipid-like molecules	Glycerophospholipids	Glycerophosphoethanolamines
HMDB0014998	Prednisolone	Lipids and lipid-like molecules	Steroids and steroid derivatives	Hydroxysteroids
HMDB0000673	Linoleic acid	Lipids and lipid-like molecules	Fatty Acyls	Lineolic acids and derivatives
HMDB0001388	alpha-Linolenic acid	Lipids and lipid-like molecules	Fatty Acyls	Lineolic acids and derivatives
HMDB0011533	MG(0:0/16:0/0:0)	Lipids and lipid-like molecules	Glycerolipids	Monoradylglycerols
HMDB0035765	p-Menthan-3-ol	Lipids and lipid-like molecules	Prenol lipids	Monoterpenoids
HMDB0036103	Geranic acid	Lipids and lipid-like molecules	Prenol lipids	Monoterpenoids
HMDB0012280	Phytosphingosine-1-P	Lipids and lipid-like molecules	Sphingolipids	Phosphosphingolipids
HMDB0036648	7-Isopropyl-1,4-dimethylazulene	Lipids and lipid-like molecules	Prenol lipids	Sesquiterpenoids
HMDB0034648	Soyasapogenol B	Lipids and lipid-like molecules	Prenol lipids	Triterpenoids
HMDB0039943	Ginsenoside Rh8	Lipids and lipid-like molecules	Prenol lipids	Triterpenoids
HMDB0001173	5'-Methylthioadenosine	Nucleosides, nucleotides, and analogues	5'-deoxyribonucleosides	5'-deoxy-5'-thionucleosides
HMDB0000014	Deoxycytidine	Nucleosides, nucleotides, and analogues	Pyrimidine nucleosides	Pyrimidine 2'-deoxyribonucleosides
HMDB0001000	dUDP	Nucleosides, nucleotides, and analogues	Pyrimidine nucleotides	Pyrimidine deoxyribonucleotides
HMDB0000050	Adenosine	Nucleosides, nucleotides, and analogues	Purine nucleosides
HMDB0000089	Cytidine	Nucleosides, nucleotides, and analogues	Pyrimidine nucleosides
HMDB0000982	5-Methylcytidine	Nucleosides, nucleotides, and analogues	Pyrimidine nucleosides
HMDB0004326	2'-O-Methyladenosine	Nucleosides, nucleotides, and analogues	Purine nucleosides
HMDB0242132	2'-O-Methylcytidine	Nucleosides, nucleotides, and analogues	Pyrimidine nucleosides
HMDB0000043	Betaine	Organic acids and derivatives	Carboxylic acids and derivatives	Amino acids, peptides, and analogues
HMDB0000064	Creatine	Organic acids and derivatives	Carboxylic acids and derivatives	Amino acids, peptides, and analogues
HMDB0000112	gamma-Aminobutyric acid	Organic acids and derivatives	Carboxylic acids and derivatives	Amino acids, peptides, and analogues
HMDB0000172	L-Isoleucine	Organic acids and derivatives	Carboxylic acids and derivatives	Amino acids, peptides, and analogues
HMDB0000181	L-Dopa	Organic acids and derivatives	Carboxylic acids and derivatives	Amino acids, peptides, and analogues
HMDB0000191	L-Aspartic acid	Organic acids and derivatives	Carboxylic acids and derivatives	Amino acids, peptides, and analogues
HMDB0000206	N6-Acetyl-L-lysine	Organic acids and derivatives	Carboxylic acids and derivatives	Amino acids, peptides, and analogues
HMDB0000517	L-Arginine	Organic acids and derivatives	Carboxylic acids and derivatives	Amino acids, peptides, and analogues
HMDB0000678	Isovalerylglycine	Organic acids and derivatives	Carboxylic acids and derivatives	Amino acids, peptides, and analogues
HMDB0000716	L-Pipecolic acid	Organic acids and derivatives	Carboxylic acids and derivatives	Amino acids, peptides, and analogues
HMDB0000721	Glycylproline	Organic acids and derivatives	Carboxylic acids and derivatives	Amino acids, peptides, and analogues
HMDB0000996	3-Sulfinoalanine	Organic acids and derivatives	Carboxylic acids and derivatives	Amino acids, peptides, and analogues
HMDB0001325	N6,N6,N6-Trimethyl-L-lysine	Organic acids and derivatives	Carboxylic acids and derivatives	Amino acids, peptides, and analogues
HMDB0001434	3-Methoxytyrosine	Organic acids and derivatives	Carboxylic acids and derivatives	Amino acids, peptides, and analogues
HMDB0001539	Asymmetric dimethylarginine	Organic acids and derivatives	Carboxylic acids and derivatives	Amino acids, peptides, and analogues
HMDB0001721	DL-O-Phosphoserine	Organic acids and derivatives	Carboxylic acids and derivatives	Amino acids, peptides, and analogues
HMDB0003157	Guanidinosuccinic acid	Organic acids and derivatives	Carboxylic acids and derivatives	Amino acids, peptides, and analogues
HMDB0003357	N2-Acetylornithine	Organic acids and derivatives	Carboxylic acids and derivatives	Amino acids, peptides, and analogues
HMDB0003464	4-Guanidinobutanoic acid	Organic acids and derivatives	Carboxylic acids and derivatives	Amino acids, peptides, and analogues
HMDB0003681	4-Acetamidobutanoic acid	Organic acids and derivatives	Carboxylic acids and derivatives	Amino acids, peptides, and analogues
HMDB0004620	N-a-Acetyl-L-arginine	Organic acids and derivatives	Carboxylic acids and derivatives	Amino acids, peptides, and analogues
HMDB0004827	Proline betaine	Organic acids and derivatives	Carboxylic acids and derivatives	Amino acids, peptides, and analogues
HMDB0005015	Gabapentin	Organic acids and derivatives	Carboxylic acids and derivatives	Amino acids, peptides, and analogues
HMDB0006029	N-Acetylglutamine	Organic acids and derivatives	Carboxylic acids and derivatives	Amino acids, peptides, and analogues
HMDB0006695	Prolylhydroxyproline	Organic acids and derivatives	Carboxylic acids and derivatives	Amino acids, peptides, and analogues
HMDB0011756	N-Acetylleucine	Organic acids and derivatives	Carboxylic acids and derivatives	Amino acids, peptides, and analogues
HMDB0014515	Meprobamate	Organic acids and derivatives	Carboxylic acids and derivatives	Amino acids, peptides, and analogues
HMDB0029217	Tyrosine methylester	Organic acids and derivatives	Carboxylic acids and derivatives	Amino acids, peptides, and analogues
HMDB0060618	6-Aminopenicillanic acid	Organic acids and derivatives	Carboxylic acids and derivatives	Amino acids, peptides, and analogues
HMDB0094696	N-Methyl-L-proline	Organic acids and derivatives	Carboxylic acids and derivatives	Amino acids, peptides, and analogues
HMDB0242126	1-Acetylproline	Organic acids and derivatives	Carboxylic acids and derivatives	Amino acids, peptides, and analogues
HMDB0250357	Clopidogrel carboxylic acid	Organic acids and derivatives	Carboxylic acids and derivatives	Amino acids, peptides, and analogues
HMDB0250782	3-[[(2S)-2,4-Dihydroxy-3,3-dimethylbutanoyl]amino]propanoic acid	Organic acids and derivatives	Carboxylic acids and derivatives	Amino acids, peptides, and analogues
HMDB0252891	Glyphosate	Organic acids and derivatives	Carboxylic acids and derivatives	Amino acids, peptides, and analogues
HMDB0255053	N-Acetyl-DL-alanine	Organic acids and derivatives	Carboxylic acids and derivatives	Amino acids, peptides, and analogues
HMDB0302841	LF	Organic acids and derivatives	Carboxylic acids and derivatives	Amino acids, peptides, and analogues
HMDB0304810	Pro-Ile	Organic acids and derivatives	Carboxylic acids and derivatives	Amino acids, peptides, and analogues
HMDB0000156	Malic acid	Organic acids and derivatives	Hydroxy acids and derivatives	Beta hydroxy acids and derivatives
HMDB0001186	N1-Acetylspermine	Organic acids and derivatives	Carboxylic acids and derivatives	Carboxylic acid derivatives
HMDB0254513	METHACRYLAMIDE	Organic acids and derivatives	Carboxylic acids and derivatives	Carboxylic acid derivatives
HMDB0255105	N-Cyclohexylformamide	Organic acids and derivatives	Carboxylic acids and derivatives	Carboxylic acid derivatives
HMDB0000254	Succinic acid	Organic acids and derivatives	Carboxylic acids and derivatives	Dicarboxylic acids and derivatives
HMDB0251379	Dimethoate	Organic acids and derivatives	Organic dithiophosphoric acids and derivatives	Dithiophosphate O-esters
HMDB0060442	beta-Alanyl-L-lysine	Organic acids and derivatives	Peptidomimetics	Hybrid peptides
HMDB0011747	Ciliatine	Organic acids and derivatives	Organic phosphonic acids and derivatives	Organic phosphonic acids
HMDB0000251	Taurine	Organic acids and derivatives	Organic sulfonic acids and derivatives	Organosulfonic acids and derivatives
HMDB0000224	O-Phosphoethanolamine	Organic acids and derivatives	Organic phosphoric acids and derivatives	Phosphate esters
HMDB0031805	(E)-Monocrotophos	Organic acids and derivatives	Organic phosphoric acids and derivatives	Phosphate esters
HMDB0000019	alpha-Ketoisovaleric acid	Organic acids and derivatives	Keto acids and derivatives	Short-chain keto acids and derivatives
HMDB0000060	Acetoacetic acid	Organic acids and derivatives	Keto acids and derivatives	Short-chain keto acids and derivatives
HMDB0001065	2-Hydroxyphenethylamine	Organic nitrogen compounds	Organonitrogen compounds	Amines
HMDB0003431	L-Histidinol	Organic nitrogen compounds	Organonitrogen compounds	Amines
HMDB0012252	Linoleoyl ethanolamide	Organic nitrogen compounds	Organonitrogen compounds	Amines
HMDB0013648	Palmitoleoylethanolamde	Organic nitrogen compounds	Organonitrogen compounds	Amines
HMDB0015177	Memantine	Organic nitrogen compounds	Organonitrogen compounds	Amines
HMDB0251428	Dioctylamine	Organic nitrogen compounds	Organonitrogen compounds	Amines
HMDB0255262	N,N-Dimethyldodecylamine	Organic nitrogen compounds	Organonitrogen compounds	Amines
HMDB0255916	Octylamine	Organic nitrogen compounds	Organonitrogen compounds	Amines
HMDB0256598	Pirimicarb	Organic nitrogen compounds	Organonitrogen compounds	Amines
HMDB0000925	Trimethylamine N-oxide	Organic nitrogen compounds	Organonitrogen compounds	Aminoxides
HMDB0255202	N-Nitrosodibutylamine	Organic nitrogen compounds	Organonitrogen compounds	Organic nitroso compounds
HMDB0000062	L-Carnitine	Organic nitrogen compounds	Organonitrogen compounds	Quaternary ammonium salts
HMDB0000097	Choline	Organic nitrogen compounds	Organonitrogen compounds	Quaternary ammonium salts
HMDB0000895	Acetylcholine	Organic nitrogen compounds	Organonitrogen compounds	Quaternary ammonium salts
HMDB0003070	Shikimic acid	Organic oxygen compounds	Organooxygen compounds	Alcohols and polyols
HMDB0004231	Panthenol	Organic oxygen compounds	Organooxygen compounds	Alcohols and polyols
HMDB0000131	Glycerol	Organic oxygen compounds	Organooxygen compounds	Carbohydrates and carbohydrate conjugates
HMDB0000592	Glucosamine 6-sulfate	Organic oxygen compounds	Organooxygen compounds	Carbohydrates and carbohydrate conjugates
HMDB0000765	Mannitol	Organic oxygen compounds	Organooxygen compounds	Carbohydrates and carbohydrate conjugates
HMDB0011730	Melezitose	Organic oxygen compounds	Organooxygen compounds	Carbohydrates and carbohydrate conjugates
HMDB0033581	Melilotoside	Organic oxygen compounds	Organooxygen compounds	Carbohydrates and carbohydrate conjugates
HMDB0000684	L-Kynurenine	Organic oxygen compounds	Organooxygen compounds	Carbonyl compounds
HMDB0001510	Bupropion	Organic oxygen compounds	Organooxygen compounds	Carbonyl compounds
HMDB0031407	Cyclopentanone	Organic oxygen compounds	Organooxygen compounds	Carbonyl compounds
HMDB0031565	Dihydrojasmone	Organic oxygen compounds	Organooxygen compounds	Carbonyl compounds
HMDB0034732	Thymoquinone	Organic oxygen compounds	Organooxygen compounds	Carbonyl compounds
HMDB0240264	6-Hydroxypseudooxynicotine	Organic oxygen compounds	Organooxygen compounds	Carbonyl compounds
HMDB0250769	D-Kynurenine	Organic oxygen compounds	Organooxygen compounds	Carbonyl compounds
HMDB0061822	Hexaethylene glycol	Organic oxygen compounds	Organooxygen compounds	Ethers
HMDB0256256	Pentaethylene glycol	Organic oxygen compounds	Organooxygen compounds	Ethers
HMDB0014828	Flurazepam	Organoheterocyclic compounds	Benzodiazepines	1,4-benzodiazepines
HMDB0250201	Chromafenozide	Organoheterocyclic compounds	Benzopyrans	1-benzopyrans
HMDB0256742	Precocene II	Organoheterocyclic compounds	Benzopyrans	1-benzopyrans
HMDB0060561	Albendazole sulfone	Organoheterocyclic compounds	Benzimidazoles	2-benzimidazolylcarbamic acid esters
HMDB0014746	Chloroquine	Organoheterocyclic compounds	Quinolines and derivatives	Aminoquinolines and derivatives
HMDB0033733	2,4-Dihydroxy-2H-1,4-benzoxazin-3(4H)-one	Organoheterocyclic compounds	Benzoxazines	Benzoxazinones
HMDB0032931	2-Benzoxazolol	Organoheterocyclic compounds	Benzoxazoles	Benzoxazolones
HMDB0000054	Bilirubin	Organoheterocyclic compounds	Tetrapyrroles and derivatives	Bilirubins
HMDB0249614	Carbazole	Organoheterocyclic compounds	Indoles and derivatives	Carbazoles
HMDB0005007	Simvastatin	Organoheterocyclic compounds	Lactones	Delta valerolactones
HMDB0244840	2H-Pyran-2-one, tetrahydro-4-hydroxy-4-methyl-, (R)-	Organoheterocyclic compounds	Lactones	Delta valerolactones
HMDB0002024	Imidazoleacetic acid	Organoheterocyclic compounds	Azoles	Imidazoles
HMDB0015052	Metronidazole	Organoheterocyclic compounds	Azoles	Imidazoles
HMDB0244884	Indazole	Organoheterocyclic compounds	Benzopyrazoles	Indazoles
HMDB0003320	Indole-3-carboxylic acid	Organoheterocyclic compounds	Indoles and derivatives	Indolecarboxylic acids and derivatives
HMDB0001190	Indoleacetaldehyde	Organoheterocyclic compounds	Indoles and derivatives	Indoles
HMDB0035762	3-(Dimethylaminomethyl)indole	Organoheterocyclic compounds	Indoles and derivatives	Indoles
HMDB0253472	Indoline	Organoheterocyclic compounds	Indoles and derivatives	Indolines
HMDB0304943	3-Methyloxindole	Organoheterocyclic compounds	Indoles and derivatives	Indolines
HMDB0304946	Indole-3-acetic acid ethyl ester	Organoheterocyclic compounds	Indoles and derivatives	Indolyl carboxylic acids and derivatives
HMDB0243970	N-Nitrosopiperidine	Organoheterocyclic compounds	Piperidines	Nitrosopiperidines
HMDB0244703	1-[3-(Trifluoromethyl)phenyl]piperazine	Organoheterocyclic compounds	Diazinanes	Piperazines
HMDB0031179	2,2,6,6-Tetramethyl-4-piperidinone	Organoheterocyclic compounds	Piperidines	Piperidinones
HMDB0000034	Adenine	Organoheterocyclic compounds	Imidazopyrimidines	Purines and purine derivatives
HMDB0000157	Hypoxanthine	Organoheterocyclic compounds	Imidazopyrimidines	Purines and purine derivatives
HMDB0001889	Theophylline	Organoheterocyclic compounds	Imidazopyrimidines	Purines and purine derivatives
HMDB0039238	6-Benzylaminopurine	Organoheterocyclic compounds	Imidazopyrimidines	Purines and purine derivatives
HMDB0001545	Pyridoxal	Organoheterocyclic compounds	Pyridines and derivatives	Pyridine carboxaldehydes
HMDB0000232	Quinolinic acid	Organoheterocyclic compounds	Pyridines and derivatives	Pyridinecarboxylic acids and derivatives
HMDB0001406	Niacinamide	Organoheterocyclic compounds	Pyridines and derivatives	Pyridinecarboxylic acids and derivatives
HMDB0003152	N-Methylnicotinamide	Organoheterocyclic compounds	Pyridines and derivatives	Pyridinecarboxylic acids and derivatives
HMDB0029836	1,2,3,4-Tetrahydro-2-methyl-b-carboline	Organoheterocyclic compounds	Indoles and derivatives	Pyridoindoles
HMDB0000239	Pyridoxine	Organoheterocyclic compounds	Pyridines and derivatives	Pyridoxines
HMDB0000300	Uracil	Organoheterocyclic compounds	Diazines	Pyrimidines and pyrimidine derivatives
HMDB0000630	Cytosine	Organoheterocyclic compounds	Diazines	Pyrimidines and pyrimidine derivatives
HMDB0002894	5-Methylcytosine	Organoheterocyclic compounds	Diazines	Pyrimidines and pyrimidine derivatives
HMDB0003361	Pyrimidine	Organoheterocyclic compounds	Diazines	Pyrimidines and pyrimidine derivatives
HMDB0014668	Dibucaine	Organoheterocyclic compounds	Quinolines and derivatives	Quinolones and derivatives
HMDB0014353	Ticlopidine	Organoheterocyclic compounds	Thienopyridines
HMDB0014868	Thiabendazole	Organoheterocyclic compounds	Benzimidazoles
HMDB0030340	Piperolein B	Organoheterocyclic compounds	Benzodioxoles
HMDB0031641	Pyrrolidine	Organoheterocyclic compounds	Pyrrolidines
HMDB0033203	6-Decanolide	Organoheterocyclic compounds	Lactones
HMDB0033701	Hydrocotarnine	Organoheterocyclic compounds	Tetrahydroisoquinolines
HMDB0248361	Ampiroxicam	Organoheterocyclic compounds	Benzothiazines
HMDB0254104	Linopirdine	Organoheterocyclic compounds	Indoles and derivatives
HMDB0301836	Pinolidoxin	Organoheterocyclic compounds	Oxocins
HMDB0302876	Guineensine	Organoheterocyclic compounds	Benzodioxoles
HMDB0303335	2-(Methylthio)benzothiazole	Organoheterocyclic compounds	Benzothiazoles
HMDB0002991	Cysteamine	Organosulfur compounds	Thiols	Alkylthiols
HMDB0031154	Allitridin	Organosulfur compounds	Organic trisulfides
HMDB0032041	1,3-Diphenyl-1-propanone	Phenylpropanoids and polyketides	Linear 1,3-diarylpropanoids	Chalcones and dihydrochalcones
HMDB0032585	4'-Methoxychalcone	Phenylpropanoids and polyketides	Linear 1,3-diarylpropanoids	Chalcones and dihydrochalcones
HMDB0030762	Ethyl trans-p-methoxycinnamate	Phenylpropanoids and polyketides	Cinnamic acids and derivatives	Cinnamic acid esters
HMDB0038365	(+)-Gallocatechin	Phenylpropanoids and polyketides	Flavonoids	Flavans
HMDB0036619	5,7-Dihydroxyflavone	Phenylpropanoids and polyketides	Flavonoids	Flavones
HMDB0036634	Phlorizin	Phenylpropanoids and polyketides	Flavonoids	Flavonoid glycosides
HMDB0034312	Isopimpinellin	Phenylpropanoids and polyketides	Coumarins and derivatives	Furanocoumarins
HMDB0253836	Kutkoside	Phenylpropanoids and polyketides	Tannins	Hydrolyzable tannins
HMDB0002269	Curcumin	Phenylpropanoids and polyketides	Diarylheptanoids	Linear diarylheptanoids
HMDB0029698	trans-Cinnamyl alcohol	Phenylpropanoids and polyketides	Cinnamyl alcohols
HMDB0039179	1,6-Digalloyl-beta-D-glucopyranose	Phenylpropanoids and polyketides	Tannins
HMDB0244095	Deoxybenzoin	Phenylpropanoids and polyketides	Stilbenes
HMDB0341139
