# Supplementary material for: Untargeted mass spectrometry to investigate ocean acidification in Cancer borealis using optimized metabolite extraction methods
Source: Royal Society of Chemistry journal article supplement (doi:10.1039/d5an00788g), 2026-01-01
Supplement: d5an00788g3.xlsx [file d5an00788g3.xlsx]

## Sheet: Table S2
Table S2 The complete list of classified metabolites in AcMeOH control group.
HMDB ID	Name	Super Class	Class	Subclass
HMDB0030285	(S)-2-Propylpiperidine	Alkaloids and derivatives
HMDB0030184	(S)-Isocorydine	Alkaloids and derivatives	Aporphines
HMDB0000875	Trigonelline	Alkaloids and derivatives
HMDB0001859	Acetaminophen	Benzenoids	Phenols	1-hydroxy-2-unsubstituted benzenoids
HMDB0003012	Aniline	Benzenoids	Benzene and substituted derivatives	Aniline and substituted anilines
HMDB0014567	Methocarbamol	Benzenoids	Phenol ethers	Anisoles
HMDB0248962	BENSULIDE	Benzenoids	Benzene and substituted derivatives	Benzenesulfonamides
HMDB0304940	2-Aminobenzenesulfonic acid	Benzenoids	Benzene and substituted derivatives	Benzenesulfonic acids and derivatives
HMDB0254690	Metsulfuron-methyl	Benzenoids	Benzene and substituted derivatives	Benzoic acids and derivatives
HMDB0014922	Mefenamic acid	Benzenoids	Benzene and substituted derivatives	Benzoic acids and derivatives
HMDB0001867	4-Aminohippuric acid	Benzenoids	Benzene and substituted derivatives	Benzoic acids and derivatives
HMDB0014750	Bisoprolol	Benzenoids	Benzene and substituted derivatives	Benzylethers
HMDB0245472	2,4,4'-Trichlorobiphenyl	Benzenoids	Benzene and substituted derivatives	Biphenyls and derivatives
HMDB0015352	Ketamine	Benzenoids	Benzene and substituted derivatives	Halobenzenes
HMDB0038457	Dihydrocapsaicin	Benzenoids	Phenols	Methoxyphenols
HMDB0032590	Zingerone	Benzenoids	Phenols	Methoxyphenols
HMDB0031464	cis-[8]-Shogaol	Benzenoids	Phenols	Methoxyphenols
HMDB0012308	Vanillin	Benzenoids	Phenols	Methoxyphenols
HMDB0002227	Capsaicin	Benzenoids	Phenols	Methoxyphenols
HMDB0000306	Tyramine	Benzenoids	Benzene and substituted derivatives	Phenethylamines
HMDB0246504	P-Toluenesulfonamide	Benzenoids	Benzene and substituted derivatives	Toluenes
HMDB0060677	2,6-Dimethylaniline	Benzenoids	Benzene and substituted derivatives	Xylenes
HMDB0256832	Propoxur	Benzenoids	Phenol ethers
HMDB0033945	2-Phenylethyl acetate	Benzenoids	Benzene and substituted derivatives
HMDB0014680	Nortriptyline	Benzenoids	Dibenzocycloheptenes
HMDB0013139	1-Hydroxypyrene	Benzenoids	Pyrenes
HMDB0001429	Phosphate	Homogeneous non-metal compounds	Non-metal oxoanionic compounds	Non-metal phosphates
HMDB0004634	4-Chloromethandienone	Lipids and lipid-like molecules	Steroids and steroid derivatives	Androstane steroids
HMDB0035080	Miltirone	Lipids and lipid-like molecules	Prenol lipids	Diterpenoids
HMDB0002697	19-Norandrosterone	Lipids and lipid-like molecules	Steroids and steroid derivatives	Estrane steroids
HMDB0240773	DL-Acetylcarnitine	Lipids and lipid-like molecules	Fatty Acyls	Fatty acid esters
HMDB0002250	Dodecanoylcarnitine	Lipids and lipid-like molecules	Fatty Acyls	Fatty acid esters
HMDB0000756	Hexanoylcarnitine	Lipids and lipid-like molecules	Fatty Acyls	Fatty acid esters
HMDB0000752	Methylglutaric acid	Lipids and lipid-like molecules	Fatty Acyls	Fatty acids and conjugates
HMDB0039954	Macamide B	Lipids and lipid-like molecules	Fatty Acyls	Fatty amides
HMDB0000086	Glycerophosphocholine	Lipids and lipid-like molecules	Glycerophospholipids	Glycerophosphocholines
HMDB0011533	MG(0:0/16:0/0:0)	Lipids and lipid-like molecules	Glycerolipids	Monoradylglycerols
HMDB0035765	p-Menthan-3-ol	Lipids and lipid-like molecules	Prenol lipids	Monoterpenoids
HMDB0035155	beta-Geraniol	Lipids and lipid-like molecules	Prenol lipids	Monoterpenoids
HMDB0014795	Mecamylamine	Lipids and lipid-like molecules	Prenol lipids	Monoterpenoids
HMDB0001878	Thymol	Lipids and lipid-like molecules	Prenol lipids	Monoterpenoids
HMDB0034648	Soyasapogenol B	Lipids and lipid-like molecules	Prenol lipids	Triterpenoids
HMDB0014847	Lamivudine	Nucleosides, nucleotides, and analogues	Nucleoside and nucleotide analogues	3'-thia pyrimidine nucleosides
HMDB0000045	Adenosine monophosphate	Nucleosides, nucleotides, and analogues	Purine nucleotides	Purine ribonucleotides
HMDB0001227	5-Thymidylic acid	Nucleosides, nucleotides, and analogues	Pyrimidine nucleotides	Pyrimidine deoxyribonucleotides
HMDB0260340	Cytidine-5'-diphosphocholine	Nucleosides, nucleotides, and analogues	Pyrimidine nucleotides	Pyrimidine ribonucleotides
HMDB0242132	2'-O-Methylcytidine	Nucleosides, nucleotides, and analogues	Pyrimidine nucleosides
HMDB0029956	Nebularine	Nucleosides, nucleotides, and analogues	Purine nucleosides
HMDB0001983	5'-Deoxyadenosine	Nucleosides, nucleotides, and analogues	5'-deoxyribonucleosides
HMDB0001563	1-Methylguanosine	Nucleosides, nucleotides, and analogues	Purine nucleosides
HMDB0000902	NAD	Nucleosides, nucleotides, and analogues	(5'->5')-dinucleotides
HMDB0000050	Adenosine	Nucleosides, nucleotides, and analogues	Purine nucleosides
HMDB0304810	Pro-Ile	Organic acids and derivatives	Carboxylic acids and derivatives	Amino acids, peptides, and analogues
HMDB0255053	N-Acetyl-DL-alanine	Organic acids and derivatives	Carboxylic acids and derivatives	Amino acids, peptides, and analogues
HMDB0250782	3-[[(2S)-2,4-Dihydroxy-3,3-dimethylbutanoyl]amino]propanoic acid	Organic acids and derivatives	Carboxylic acids and derivatives	Amino acids, peptides, and analogues
HMDB0094696	N-Methyl-L-proline	Organic acids and derivatives	Carboxylic acids and derivatives	Amino acids, peptides, and analogues
HMDB0062795	N-carbamoylglutamic Acid	Organic acids and derivatives	Carboxylic acids and derivatives	Amino acids, peptides, and analogues
HMDB0062660	N-methyl-L-glutamic Acid	Organic acids and derivatives	Carboxylic acids and derivatives	Amino acids, peptides, and analogues
HMDB0036458	1-Aminocyclopropanecarboxylic acid	Organic acids and derivatives	Carboxylic acids and derivatives	Amino acids, peptides, and analogues
HMDB0032055	N-Acetylhistidine	Organic acids and derivatives	Carboxylic acids and derivatives	Amino acids, peptides, and analogues
HMDB0011756	N-Acetylleucine	Organic acids and derivatives	Carboxylic acids and derivatives	Amino acids, peptides, and analogues
HMDB0011171	gamma-Glutamylleucine	Organic acids and derivatives	Carboxylic acids and derivatives	Amino acids, peptides, and analogues
HMDB0006029	N-Acetylglutamine	Organic acids and derivatives	Carboxylic acids and derivatives	Amino acids, peptides, and analogues
HMDB0006028	N-Acetylasparagine	Organic acids and derivatives	Carboxylic acids and derivatives	Amino acids, peptides, and analogues
HMDB0005015	Gabapentin	Organic acids and derivatives	Carboxylic acids and derivatives	Amino acids, peptides, and analogues
HMDB0004827	Proline betaine	Organic acids and derivatives	Carboxylic acids and derivatives	Amino acids, peptides, and analogues
HMDB0003681	4-Acetamidobutanoic acid	Organic acids and derivatives	Carboxylic acids and derivatives	Amino acids, peptides, and analogues
HMDB0003464	4-Guanidinobutanoic acid	Organic acids and derivatives	Carboxylic acids and derivatives	Amino acids, peptides, and analogues
HMDB0003423	D-Glutamine	Organic acids and derivatives	Carboxylic acids and derivatives	Amino acids, peptides, and analogues
HMDB0003357	N2-Acetylornithine	Organic acids and derivatives	Carboxylic acids and derivatives	Amino acids, peptides, and analogues
HMDB0003157	Guanidinosuccinic acid	Organic acids and derivatives	Carboxylic acids and derivatives	Amino acids, peptides, and analogues
HMDB0001434	3-Methoxytyrosine	Organic acids and derivatives	Carboxylic acids and derivatives	Amino acids, peptides, and analogues
HMDB0001370	Diaminopimelic acid	Organic acids and derivatives	Carboxylic acids and derivatives	Amino acids, peptides, and analogues
HMDB0000725	4-Hydroxyproline	Organic acids and derivatives	Carboxylic acids and derivatives	Amino acids, peptides, and analogues
HMDB0000678	Isovalerylglycine	Organic acids and derivatives	Carboxylic acids and derivatives	Amino acids, peptides, and analogues
HMDB0000641	L-Glutamine	Organic acids and derivatives	Carboxylic acids and derivatives	Amino acids, peptides, and analogues
HMDB0000517	L-Arginine	Organic acids and derivatives	Carboxylic acids and derivatives	Amino acids, peptides, and analogues
HMDB0000512	N-Acetyl-L-phenylalanine	Organic acids and derivatives	Carboxylic acids and derivatives	Amino acids, peptides, and analogues
HMDB0000479	3-Methylhistidine	Organic acids and derivatives	Carboxylic acids and derivatives	Amino acids, peptides, and analogues
HMDB0000450	5-Hydroxylysine	Organic acids and derivatives	Carboxylic acids and derivatives	Amino acids, peptides, and analogues
HMDB0000181	L-Dopa	Organic acids and derivatives	Carboxylic acids and derivatives	Amino acids, peptides, and analogues
HMDB0000177	L-Histidine	Organic acids and derivatives	Carboxylic acids and derivatives	Amino acids, peptides, and analogues
HMDB0000172	L-Isoleucine	Organic acids and derivatives	Carboxylic acids and derivatives	Amino acids, peptides, and analogues
HMDB0000167	L-Threonine	Organic acids and derivatives	Carboxylic acids and derivatives	Amino acids, peptides, and analogues
HMDB0000162	L-Proline	Organic acids and derivatives	Carboxylic acids and derivatives	Amino acids, peptides, and analogues
HMDB0000161	L-Alanine	Organic acids and derivatives	Carboxylic acids and derivatives	Amino acids, peptides, and analogues
HMDB0000148	L-Glutamic acid	Organic acids and derivatives	Carboxylic acids and derivatives	Amino acids, peptides, and analogues
HMDB0000123	Glycine	Organic acids and derivatives	Carboxylic acids and derivatives	Amino acids, peptides, and analogues
HMDB0000112	gamma-Aminobutyric acid	Organic acids and derivatives	Carboxylic acids and derivatives	Amino acids, peptides, and analogues
HMDB0000092	Dimethylglycine	Organic acids and derivatives	Carboxylic acids and derivatives	Amino acids, peptides, and analogues
HMDB0000064	Creatine	Organic acids and derivatives	Carboxylic acids and derivatives	Amino acids, peptides, and analogues
HMDB0000043	Betaine	Organic acids and derivatives	Carboxylic acids and derivatives	Amino acids, peptides, and analogues
HMDB0000156	Malic acid	Organic acids and derivatives	Hydroxy acids and derivatives	Beta hydroxy acids and derivatives
HMDB0002189	N8-Acetylspermidine	Organic acids and derivatives	Carboximidic acids and derivatives	Carboximidic acids
HMDB0255105	N-Cyclohexylformamide	Organic acids and derivatives	Carboxylic acids and derivatives	Carboxylic acid derivatives
HMDB0001888	N,N-Dimethylformamide	Organic acids and derivatives	Carboxylic acids and derivatives	Carboxylic acid derivatives
HMDB0001873	Isobutyric acid	Organic acids and derivatives	Carboxylic acids and derivatives	Carboxylic acids
HMDB0060442	beta-Alanyl-L-lysine	Organic acids and derivatives	Peptidomimetics	Hybrid peptides
HMDB0000251	Taurine	Organic acids and derivatives	Organic sulfonic acids and derivatives	Organosulfonic acids and derivatives
HMDB0259164	TRIBUTYL PHOSPHATE	Organic acids and derivatives	Organic phosphoric acids and derivatives	Phosphate esters
HMDB0000060	Acetoacetic acid	Organic acids and derivatives	Keto acids and derivatives	Short-chain keto acids and derivatives
HMDB0002375	Chicoric acid	Organic acids and derivatives	Carboxylic acids and derivatives	Tetracarboxylic acids and derivatives
HMDB0244166	1,3-Dicyclohexylurea	Organic acids and derivatives	Organic carbonic acids and derivatives	Ureas
HMDB0015576	Thiotepa	Organic acids and derivatives	Organic thiophosphoric acids and derivatives
HMDB0251428	Dioctylamine	Organic nitrogen compounds	Organonitrogen compounds	Amines
HMDB0015177	Memantine	Organic nitrogen compounds	Organonitrogen compounds	Amines
HMDB0013658	Docosahexaenoyl Ethanolamide	Organic nitrogen compounds	Organonitrogen compounds	Amines
HMDB0013648	Palmitoleoylethanolamde	Organic nitrogen compounds	Organonitrogen compounds	Amines
HMDB0001065	2-Hydroxyphenethylamine	Organic nitrogen compounds	Organonitrogen compounds	Amines
HMDB0000269	Sphinganine	Organic nitrogen compounds	Organonitrogen compounds	Amines
HMDB0000925	Trimethylamine N-oxide	Organic nitrogen compounds	Organonitrogen compounds	Aminoxides
HMDB0251214	Dicyclohexylamine	Organic nitrogen compounds	Organonitrogen compounds	Cyclohexylamines
HMDB0000895	Acetylcholine	Organic nitrogen compounds	Organonitrogen compounds	Quaternary ammonium salts
HMDB0000097	Choline	Organic nitrogen compounds	Organonitrogen compounds	Quaternary ammonium salts
HMDB0000062	L-Carnitine	Organic nitrogen compounds	Organonitrogen compounds	Quaternary ammonium salts
HMDB0004231	Panthenol	Organic oxygen compounds	Organooxygen compounds	Alcohols and polyols
HMDB0003072	Quinic acid	Organic oxygen compounds	Organooxygen compounds	Alcohols and polyols
HMDB0003070	Shikimic acid	Organic oxygen compounds	Organooxygen compounds	Alcohols and polyols
HMDB0000210	Pantothenic acid	Organic oxygen compounds	Organooxygen compounds	Alcohols and polyols
HMDB0254645	Methylglucamine	Organic oxygen compounds	Organooxygen compounds	Carbohydrates and carbohydrate conjugates
HMDB0247887	Acarbosa	Organic oxygen compounds	Organooxygen compounds	Carbohydrates and carbohydrate conjugates
HMDB0029710	DIMBOA-Glc	Organic oxygen compounds	Organooxygen compounds	Carbohydrates and carbohydrate conjugates
HMDB0011730	Melezitose	Organic oxygen compounds	Organooxygen compounds	Carbohydrates and carbohydrate conjugates
HMDB0003213	Raffinose	Organic oxygen compounds	Organooxygen compounds	Carbohydrates and carbohydrate conjugates
HMDB0000247	Sorbitol	Organic oxygen compounds	Organooxygen compounds	Carbohydrates and carbohydrate conjugates
HMDB0031407	Cyclopentanone	Organic oxygen compounds	Organooxygen compounds	Carbonyl compounds
HMDB0000684	L-Kynurenine	Organic oxygen compounds	Organooxygen compounds	Carbonyl compounds
HMDB0256256	Pentaethylene glycol	Organic oxygen compounds	Organooxygen compounds	Ethers
HMDB0094680	Octaethylene glycol	Organic oxygen compounds	Organooxygen compounds	Ethers
HMDB0034850	Metosulam	Organoheterocyclic compounds	Triazolopyrimidines	1,2,4-triazolopyrimidine-2-sulfonamides
HMDB0042006	Ricinine	Organoheterocyclic compounds	Pyridines and derivatives	3-pyridinecarbonitriles
HMDB0000244	Riboflavin	Organoheterocyclic compounds	Pteridines and derivatives	Alloxazines and isoalloxazines
HMDB0014707	Cephalexin	Organoheterocyclic compounds	Lactams	Beta lactams
HMDB0250981	delta-Valerolactone	Organoheterocyclic compounds	Lactones	Delta valerolactones
HMDB0244840	2H-Pyran-2-one, tetrahydro-4-hydroxy-4-methyl-, (R)-	Organoheterocyclic compounds	Lactones	Delta valerolactones
HMDB0253644	Isoguvacine	Organoheterocyclic compounds	Pyridines and derivatives	Hydropyridines
HMDB0015052	Metronidazole	Organoheterocyclic compounds	Azoles	Imidazoles
HMDB0003447	Tryptophol	Organoheterocyclic compounds	Indoles and derivatives	Indoles
HMDB0001190	Indoleacetaldehyde	Organoheterocyclic compounds	Indoles and derivatives	Indoles
HMDB0304943	3-Methyloxindole	Organoheterocyclic compounds	Indoles and derivatives	Indolines
HMDB0253472	Indoline	Organoheterocyclic compounds	Indoles and derivatives	Indolines
HMDB0029738	Indole-3-methyl acetate	Organoheterocyclic compounds	Indoles and derivatives	Indolyl carboxylic acids and derivatives
HMDB0014623	Lenalidomide	Organoheterocyclic compounds	Isoindoles and derivatives	Isoindolines
HMDB0014405	Cycloserine	Organoheterocyclic compounds	Azolines	Isoxazolines
HMDB0031581	Morpholine	Organoheterocyclic compounds	Oxazinanes	Morpholines
HMDB0244703	1-[3-(Trifluoromethyl)phenyl]piperazine	Organoheterocyclic compounds	Diazinanes	Piperazines
HMDB0014849	Diethylcarbamazine	Organoheterocyclic compounds	Diazinanes	Piperazines
HMDB0015096	Mepivacaine	Organoheterocyclic compounds	Piperidines	Piperidinecarboxylic acids and derivatives
HMDB0001889	Theophylline	Organoheterocyclic compounds	Imidazopyrimidines	Purines and purine derivatives
HMDB0000473	6-Dimethylaminopurine	Organoheterocyclic compounds	Imidazopyrimidines	Purines and purine derivatives
HMDB0000157	Hypoxanthine	Organoheterocyclic compounds	Imidazopyrimidines	Purines and purine derivatives
HMDB0000034	Adenine	Organoheterocyclic compounds	Imidazopyrimidines	Purines and purine derivatives
HMDB0252265	Fipronil	Organoheterocyclic compounds	Azoles	Pyrazoles
HMDB0001545	Pyridoxal	Organoheterocyclic compounds	Pyridines and derivatives	Pyridine carboxaldehydes
HMDB0244780	Clopyralid	Organoheterocyclic compounds	Pyridines and derivatives	Pyridinecarboxylic acids and derivatives
HMDB0000017	4-Pyridoxic acid	Organoheterocyclic compounds	Pyridines and derivatives	Pyridinecarboxylic acids and derivatives
HMDB0029836	1,2,3,4-Tetrahydro-2-methyl-b-carboline	Organoheterocyclic compounds	Indoles and derivatives	Pyridoindoles
HMDB0000239	Pyridoxine	Organoheterocyclic compounds	Pyridines and derivatives	Pyridoxines
HMDB0014690	Propylthiouracil	Organoheterocyclic compounds	Diazines	Pyrimidines and pyrimidine derivatives
HMDB0000630	Cytosine	Organoheterocyclic compounds	Diazines	Pyrimidines and pyrimidine derivatives
HMDB0000300	Uracil	Organoheterocyclic compounds	Diazines	Pyrimidines and pyrimidine derivatives
HMDB0015547	Deferasirox	Organoheterocyclic compounds	Azoles	Triazoles
HMDB0254408	Mefenacet	Organoheterocyclic compounds	Benzothiazoles
HMDB0248947	bendiocarb	Organoheterocyclic compounds	Benzodioxoles
HMDB0248361	Ampiroxicam	Organoheterocyclic compounds	Benzothiazines
HMDB0035924	Pyrrole	Organoheterocyclic compounds	Heteroaromatic compounds
HMDB0034299	Patulin	Organoheterocyclic compounds	Pyrans
HMDB0033701	Hydrocotarnine	Organoheterocyclic compounds	Tetrahydroisoquinolines
HMDB0031641	Pyrrolidine	Organoheterocyclic compounds	Pyrrolidines
HMDB0014878	Riluzole	Organoheterocyclic compounds	Benzothiazoles
HMDB0005034	Topiramate	Organoheterocyclic compounds	Dioxolopyrans
HMDB0032041	1,3-Diphenyl-1-propanone	Phenylpropanoids and polyketides	Linear 1,3-diarylpropanoids	Chalcones and dihydrochalcones
HMDB0038365	(+)-Gallocatechin	Phenylpropanoids and polyketides	Flavonoids	Flavans
HMDB0005800	Luteolin	Phenylpropanoids and polyketides	Flavonoids	Flavones
HMDB0037362	Isoquercitrin	Phenylpropanoids and polyketides	Flavonoids	Flavonoid glycosides
HMDB0034312	Isopimpinellin	Phenylpropanoids and polyketides	Coumarins and derivatives	Furanocoumarins
HMDB0000954	Ferulic acid	Phenylpropanoids and polyketides	Cinnamic acids and derivatives	Hydroxycinnamic acids and derivatives
HMDB0033979	7-Hydroxy-2-methylisoflavone	Phenylpropanoids and polyketides	Isoflavonoids	Isoflav-2-enes
HMDB0252128	Eupatorin	Phenylpropanoids and polyketides	Flavonoids	O-methylated flavonoids
HMDB0242676	(2R,3S)-Epoxiconazole	Phenylpropanoids and polyketides	Stilbenes
HMDB0039179	1,6-Digalloyl-beta-D-glucopyranose	Phenylpropanoids and polyketides	Tannins
