# Supplementary material for: Untargeted mass spectrometry to investigate ocean acidification in Cancer borealis using optimized metabolite extraction methods
Source: Royal Society of Chemistry journal article supplement (doi:10.1039/d5an00788g), 2026-01-01
Supplement: d5an00788g5.xlsx [file d5an00788g5.xlsx]

## Sheet: AcMeOH Ctrl
Table S4. The complete list of detected metabolites in AcMeOH control group.
Title	RT (min)	Precursor m/z	Reference m/z	Formula	Ontology	InChIKey	SMILES	mass error	Total score	S/N
(2aS,6aS,8aS)-10-(4-acetamido-3-methylbutyl)-6a,8a,9-trimethyl-2,2a,3,4,5,6,6a,6b,7,8,8a,8b,11a,12,12a,12b-hexadecahydro-1H-naphtho[2',1':4,5]indeno[2,1-b]furan-4-yl acetate	10.5235	522.347	522.35	C31H49NO4	Furostanes and derivatives	NNRLQJLRICHBII-FWVIVEMUSA-N	O=C(OC1CCC2(C)C(CCC3C2CCC4(C)C5C(=C(OC5CC34)CCC(C)CNC(=O)C)C)C1)C	5.13066	67.9	15.7565
(2S,3R,4R,5R,6S)-2-(((2R,3R,4S,5R,6R)-3-hydroxy-2-(hydroxymethyl)-6-(((2'R,5'R,6aR,8aS,9S)-5',6a,8a,9-tetramethyl-1,3,3',4,4',5,5',6,6a,6b,6',7,8,8a,8b,9,11a,12,12a,12b-icosahydrospiro[naphtho[2',1':4,5]indeno[2,1-b]furan-10,2'-pyran]-4-yl)oxy)-5-(((2S,3R,4S,5S,6R)-3,4,5-trihydroxy-6-(hydroxymethyl)tetrahydro-2H-pyran-2-yl)oxy)tetrahydro-2H-pyran-4-yl)oxy)-6-methyltetrahydro-2H-pyran-3,4,5-triol	16.8922	907.447	907.46	C45H72O17	Steroidal saponins	DAIAMOGGSOXZSO-PCFBXLSYSA-N	OCC1OC(OC2C(OC3CC4=CCC5C(CCC6(C)C5CC7OC8(OCC(C)CC8)C(C)C76)C4(C)CC3)OC(CO)C(O)C2OC9OC(C)C(O)C(O)C9O)C(O)C(O)C1O	13.9069	63.6	19.8218
(3R,3aS,4S,8aR)-3-hydroxy-3-isopropyl-6,8a-dimethyl-1,2,3,3a,4,5,8,8a-octahydroazulen-4-yl 4-hydroxybenzoate	10.3369	381.196	381.2	C22H30O4	Sesquiterpenoids	CYSHNJQMYORNJI-YUVXSKOASA-N	O=C(OC1CC(=CCC2(C)CCC(O)(C(C)C)C12)C)C3=CC=C(O)C=C3	11.5687	62.5	9.85846
(3R,5S,17R)-17-hydroxy-10,13-dimethylhexadecahydro-1H-cyclopenta[a]phenanthren-3-aminium chloride	7.60583	328.244	328.24	C19H34ClNO	Androstane steroids	GYQZNNAZXVKYOR-YHGFUEDJSA-N	[Cl-].OC1CCC2C3CCC4CC([NH3+])CCC4(C)C3CCC12C	12.826	53.4	10.7927
(E)-1-(4-methylquinazolin-2(1H)-ylidene)guanidine	16.5867	224.092	224.09	C10H11N5	Quinazolinamines	ONQKSKDLYYDFLL-UHFFFAOYSA-N	N=C(N=C1N=C(C=2C=CC=CC2N1)C)N	9.81748	61.1	5.91751
1,2,3,4-tetrahydro-6-methoxy-1-oxo-beta-carboline	8.71832	217.101	217.1	C12H12N2O2	Beta carbolines	PWARHDUWOJUADN-UHFFFAOYSA-N	O=C1NCCC=2C=3C=C(OC)C=CC3NC12	6.40258	71.1	14.5321
1-Dodecyl-2-pyrrolidinone	4.06253	254.248	254.248	C16H31NO	N-alkylpyrrolidines	NJPQAIBZIHNJDO-UHFFFAOYSA-N	CCCCCCCCCCCCN1CCCC1=O	0.983292	55.7	59.6654
1-Methylguanosine	10.4782	298.112	298.115	C11H15N5O5	Purine nucleosides	UTAIYTHAJQNQDW-KQYNXXCUSA-N	O=C1C=2N=CN(C2NC(=N)N1C)C3OC(CO)C(O)C3O	9.35882	88.7	9.58901
1-Monostearin	2.71383	359.313	359.316	C21H42O4	1-monoacylglycerols	VBICKXHEKHSIBG-UHFFFAOYSA-N	O=C(OCC(O)CO)CCCCCCCCCCCCCCCCC	5.78878	54.8	11.1146
2-(2,3-dihydrobenzo[b][1,4]dioxin-6-yl)-6-methylchroman-4-one	17.216	319.089	319.09	C18H16O4	Flavonolignans	FVNYMYXXKXAQHS-UHFFFAOYSA-N	O=C1C2=CC(=CC=C2OC(C3=CC=C4OCCOC4=C3)C1)C	2.19374	63	26.0731
2`-O-Methylguanosine	10.0765	298.111	298.115	C11H15N5O5	Purine nucleosides	OVYNGSFVYRPRCG-KQYNXXCUSA-N	CO[C@@H]1[C@@H]([C@H](O[C@H]1n2cnc3c2nc([nH]c3=O)N)CO)O	10.3651	78.8	47.0753
20(R)-Protopanaxadiol	9.15702	483.374	483.38	C30H52O3	Triterpenoids	PYXFVCFISTUSOO-VUFVRDRTSA-N	OC1CC2C3(C)CCC(O)C(C)(C)C3CCC2(C)C4(C)CCC(C14)C(O)(C)CCC=C(C)C	12.2057	63.2	14.039
2-amino-3-(5-hydroxy-1H-indol-3-yl)propanoic acid	15.0569	221.091	221.09	C19H22N2O	Eburnan-type alkaloids	WYJAPUKIYAZSEM-MOPGFXCFSA-N	O=C1N2C=3C=CC=CC3C4=C2C5N(CC4)CCCC5(C1)CC	6.33226	74	5.59742
2'-O-Methylcytidine	10.7108	258.107	258.108	C10H15N3O5	Pyrimidine nucleosides	RFCQJGFZUQFYRF-ZOQUXTDFSA-N	N=C1N=C(O)N(C=C1)C2OC(CO)C(O)C2OC	6.81884	80.1	6.38685
2'-O-Methylcytidine	10.1632	258.112	258.108	C10H15N3O5	Pyrimidine nucleosides	RFCQJGFZUQFYRF-UHFFFAOYSA-N	COC1C(C(OC1N2C=CC(=NC2=O)N)CO)O	14.8775	61.1	8.1261
3-(4-hydroxyphenyl)-1-phenyl-2-propen-1-one	18.6145	225.091	225.09	C15H12O2	Retrochalcones	PWWCDTYUYPOAIU-DHZHZOJOSA-N	O=C(C=CC1=CC=C(O)C=C1)C=2C=CC=CC2	6.664	65.9	22.989
4'-Demethylpodophyllotoxin	1.78218	401.118	401.12	C21H20O8	Podophyllotoxins	YVCVYCSAAZQOJI-BTINSWFASA-N	O=C1OCC2C(O)C3=CC=4OCOC4C=C3C(C5=CC(OC)=C(O)C(OC)=C5)C12	4.73674	52.7	5.63814
6-(methylamino)hexane-1,2,3,4,5-pentaol	16.5867	218.101	218.1	C7H17NO5	Hexoses	MBBZMMPHUWSWHV-UHFFFAOYSA-N	OCC(O)C(O)C(O)C(O)CNC	2.70518	53.8	6.71835
6-Demethoxytangeretin	15.6431	365.105	365.1	C19H18O6	8-O-methylated flavonoids	DDGJUTBQQURRGE-UHFFFAOYSA-N	O=C1C=C(OC=2C(OC)=C(OC)C=C(OC)C12)C=3C=CC(OC)=CC3	13.3936	55.4	12.367
7-hydroxy-2-methyl-3-phenyl-4H-chromen-4-one	16.1596	253.092	253.09	C16H12O3	Isoflavones	BBCDTCKKROIGAB-UHFFFAOYSA-N	O=C1C2=CC=C(O)C=C2OC(=C1C=3C=CC=CC3)C	6.71698	51	7.00386
7-O-Ethylmorroniside	9.63495	457.176	457.169	C19H30O11	O-glycosyl compounds	IRKFOLIBBQDADK-LEYKIWRXSA-N	O=C(OC)C1=COC(OC2OC(CO)C(O)C(O)C2O)C3C(OC(OCC)CC13)C	15.5085	81.1	46.1252
8-Gingerol	18.842	345.199	345.2	C19H30O4	Gingerols	BCIWKKMTBRYQJU-INIZCTEOSA-N	O=C(CCC1=CC=C(O)C(OC)=C1)CC(O)CCCCCCC	3.50521	61.1	8.22625
9-methoxycarbonyldec-9-enoic acid_major	18.1386	246.171	246.17	C12H20O4	Medium-chain fatty acids	ZUNJWEGRDSXKIO-UHFFFAOYSA-N	C=C(CCCCCCCC(=O)O)C(=O)OC	3.73726	63.1	23.3803
Adenosine	9.59388	268.102	268.104	C10H13N5O4	Purine nucleosides	OIRDTQYFTABQOQ-KQYNXXCUSA-N	NC1=C2N=CN([C@@H]3O[C@H](CO)[C@@H](O)[C@H]3O)C2=NC=N1	6.82571	69.9	14.4437
Adenosine	9.57995	268.102	268.104	C10H13N5O4	Purine nucleosides	OIRDTQYFTABQOQ-UHFFFAOYSA-N	OCC1OC(N2C=NC=3C(=NC=NC32)N)C(O)C1O	6.82571	82.7	12.4482
ADENOSINE 5'-MONOPHOSPHATE	17.665	348.065	348.07	C10H14N5O7P	Purine ribonucleoside monophosphates	UDMBCSSLTHHNCD-KQYNXXCUSA-N	C1=NC(=C2C(=N1)N(C=N2)[C@H]3[C@@H]([C@@H]([C@H](O3)COP(=O)(O)O)O)O)N	15.7152	80.6	18.6381
Angustifoline	16.2695	235.178	235.18	C14H22N2O	Quinolizidinones	VTIPIBIDDZPDAV-IFWUJCSASA-N	C=CC[C@@H]1NCC2CC1CN1[C@@H]2CCCC1=O	11.9057	55.3	5.7984
anisodine	16.757	342.134	342.13	C17H21NO5	Beta hydroxy acids and derivatives	JEJREKXHLFEVHN-QARARZEYSA-N	O=C(OC1CC2N(C)C(C1)C3OC32)C(O)(C=4C=CC=CC4)CO	12.8606	56.2	14.8783
Bendiocarb	16.581	224.092	224.092	C11H13NO4	Benzodioxoles	XEGGRYVFLWGFHI-UHFFFAOYSA-N	CNC(=O)OC1=CC=CC2=C1OC(C)(C)O2	2.05273	60.1	11.6859
Bufalin	8.97512	409.229	409.23	C24H34O4	Bufanolides and derivatives	QEEBRPGZBVVINN-BMPKRDENSA-N	O=C1OC=C(C=C1)C2CCC3(O)C4CCC5CC(O)CCC5(C)C4CCC23C	1.97933	62.8	22.3934
Butylphthalyl butylglycolate	21.7707	337.159	337.165	C18H24O6	Benzoic acid esters	GOJCZVPJCKEBQV-UHFFFAOYSA-N	CCCCOC(=O)COC(=O)C1=CC=CC=C1C(=O)OCCCC	16.1642	55.6	7.71181
C14-homoserine lactone	4.19795	312.25	312.253	C18H33NO3	N-acyl-alpha amino acids and derivatives	ZQAYHOXXVBVXPZ-UHFFFAOYSA-N	CCCCCCCCCCCCCC(=O)NC1CCOC1=O	10.0239	56.4	123.292
Calcium (+)-pantothenate	17.901	220.116	220.118	C9H17NO5	Secondary alcohols	GHOKWGTUZJEAQD-ZETCQYMHSA-N	OCC(C)(C)[C@@H](O)C(=O)NCCC(O)=O	7.49598	63	11.4863
Camptothecin	3.16122	371.097	371.1	C20H16N2O4	Camptothecins	VSJKWCGYPAHWDS-FQEVSTJZSA-N	O=C1OCC=2C(=O)N3C(=CC2C1(O)CC)C=4N=C5C=CC=CC5=CC4C3	9.1889	61	9.27125
Chlorotoluron	17.7171	213.082	213.079	C10H13ClN2O	N-phenylureas	JXCGFZXSOMJFOA-UHFFFAOYSA-N	CN(C)C(=O)NC1=CC(Cl)=C(C)C=C1	13.0468	54.3	12.679
Citicoline	19.0705	489.111	489.115	C14H26N4O11P2	Pyrimidine ribonucleoside diphosphates	RZZPDXZPRHQOCG-UHFFFAOYSA-N	C[N+](C)(C)CCOP([O-])(=O)OP(O)(=O)OCC1OC(C(O)C1O)N1C=CC(N)=NC1=O	6.31754	78.6	12.7386
Decanoyl-L-Carnitine	13.9234	316.247	316.248	C17H33NO4	Acyl carnitines	LZOSYCMHQXPBFU-UHFFFAOYSA-N	CCCCCCCCCC(=O)OC(CC(=O)[O-])C[N+](C)(C)C	4.52176	60.8	20.2572
Dicyclohexylurea	1.70865	225.196	225.196	C13H24N2O	Ureas	ADFXKUOMJKEIND-UHFFFAOYSA-N	C1CCC(CC1)NC(=O)NC2CCCCC2	0.62168	60.5	7.8535
dioctylamine	12.2448	242.284	242.284	C16H35N	Dialkylamines	LAWOZCWGWDVVSG-UHFFFAOYSA-N	N(CCCCCCCC)CCCCCCCC	1.36204	58.9	193.709
D-Panose	15.922	505.175	505.176	C18H32O16	Oligosaccharides	OWEGMIWEEQEYGQ-RKEGTIJYSA-N	C(C1C(C(C(C(O1)OCC2C(C(C(C(O2)OC3C(OC(C(C3O)O)O)CO)O)O)O)O)O)O)O	2.57336	53.8	29.3504
Erucamide	3.56055	338.341	338.342	C22H43NO	Fatty amides	UAUDZVJPLUQNMU-KTKRTIGZSA-N	NC(=O)CCCCCCCCCCC/C=C\CCCCCCCC	2.18714	56.7	15.0181
Eudesmin	3.77505	387.187	387.18	C22H26O6	Furanoid lignans	PEUUVVGQIVMSAW-RZTYQLBFSA-N	O(C1=CC=C(C=C1OC)C2OCC3C(OCC23)C4=CC=C(OC)C(OC)=C4)C	19.1384	61.5	8.17352
Excavatin M	12.5416	383.112	383.11	C19H20O7	Coumarins and derivatives	UMYAEKVHXDURJS-SVYNMNNPSA-N	O=C1OC=2C=C(OCC3OC3(C)CC4OC(=O)C(O)(C)C4)C=CC2C=C1	5.24654	62.5	28.2123
Gallocatechin	18.9477	329.057	329.06	C15H14O7	Epigallocatechins	XMOCLSLCDHWDHP-SWLSCSKDSA-N	OC=1C=C(O)C2=C(OC(C3=CC(O)=C(O)C(O)=C3)C(O)C2)C1	10.6364	55.9	54.5865
gamma-L-Glutamyl-L-leucine	15.7135	261.14	261.144	C11H20N2O5	Dipeptides	MYFMARDICOWMQP-YUMQZZPRSA-N	O=C(O)C(N=C(O)CCC(N)C(=O)O)CC(C)C	15.7001	63.2	9.80539
Glycerophosphocholine	20.9602	258.107	258.11	C8H20NO6P	Glycerophosphocholines	SUHOQUVVVLNYQR-MRVPVSSYSA-N	C[N+](C)(C)CCOP(=O)([O-])OC[C@@H](CO)O	13.2114	84	52.3195
GUANOSINE	11.414	284.095	284.099	C10H13N5O5	Purine nucleosides	NYHBQMYGNKIUIF-UUOKFMHZSA-N	C1=NC2=C(N1[C@H]3[C@@H]([C@@H]([C@H](O3)CO)O)O)NC(=NC2=O)N	13.1644	91.3	55.1655
Hexanoyl-L-Carnitine	16.5486	260.187	260.186	C13H25NO4	Acyl carnitines	VVPRQWTYSNDTEA-LLVKDONJSA-N	CCCCCC(=O)O[C@H](CC(=O)[O-])C[N+](C)(C)C	5.22704	78.6	7.80036
Imidocarb	11.4191	349.18	349.177	C19H20N6O	N-phenylureas	SCEVFJUWLLRELN-UHFFFAOYSA-N	c1cc(cc(c1)NC(=O)Nc2cccc(c2)C3=NCCN3)C4=NCCN4	7.10241	81.8	12.8887
inosine	10.6898	291.07	291.07	C10H12N4O5	Purine nucleosides	UGQMRVRMYYASKQ-KQYNXXCUSA-N	O=C1N=CNC2=C1N=CN2C3OC(CO)C(O)C3O	0.034356	73.9	83.3504
Isocorydine	18.5846	364.151	364.15	C20H23NO4	Aporphines	QELDJEKNFOQJOY-ZDUSSCGKSA-N	OC=1C(OC)=CC=C2C1C=3C(OC)=C(OC)C=C4C3C(N(C)CC4)C2	2.49897	61.1	7.57362
Lauramidopropyl betaine	12.2206	343.291	343.296	[C19H39N2O3]+	Alpha amino acids	MRUAUOIMASANKQ-UHFFFAOYSA-O	CCCCCCCCCCCC(=O)NCCC[N+](C)(C)CC(O)=O	13.1956	81.1	9.72218
Laurocapram	3.65365	282.277	282.279	C18H35NO	Caprolactams	AXTGDCSMTYGJND-UHFFFAOYSA-N	CCCCCCCCCCCCN1CCCCCC1=O	6.87263	62.3	661.636
LAUROYLCARNITINE	13.4204	344.277	344.28	C19H37NO4	Acyl carnitines	FUJLYHJROOYKRA-QGZVFWFLSA-N	CCCCCCCCCCCC(=O)O[C@H](CC([O-])=O)C[N+](C)(C)C	6.21588	72.3	6.09528
Luteolin	14.9406	309.036	309.04	C15H10O6	Flavones	IQPNAANSBPBGFQ-UHFFFAOYSA-N	O=C1C=C(OC=2C=C(O)C=C(O)C12)C=3C=CC(O)=C(O)C3	13.2992	58.5	6.22062
Mefenamic acid	21.412	242.116	242.118	C15H15NO2	Aminobenzoic acids	HYYBABOKPJLUIN-UHFFFAOYSA-N	CC1=C(C)C(NC2=C(C=CC=C2)C(O)=O)=CC=C1	5.16278	58.4	15.0386
Melezitose	17.107	527.154	527.158	C18H32O16	Oligosaccharides	QWIZNVHXZXRPDR-WSCXOGSTSA-N	OCC1OC(OC2C(O)C(OC2(OC3OC(CO)C(O)C(O)C3O)CO)CO)C(O)C(O)C1O	8.65015	82.9	43.0901
Mepivacaine	21.8038	247.18	247.18	C15H22N2O	Piperidinecarboxamides	INWLQCZOYSRPNW-UHFFFAOYSA-N	O=C(Nc1c(cccc1C)C)C2N(C)CCCC2	1.21369	59.7	9.53216
methyl 2-((2-methyl-4-oxo-3-phenoxy-4H-chromen-7-yl)oxy)acetate	17.178	363.077	363.08	C19H16O6	Chromones	AKNHFZVXJDNNJF-UHFFFAOYSA-N	O=C(OC)COC1=CC=C2C(OC(=C(OC=3C=CC=CC3)C2=O)C)=C1	9.06136	62.6	16.1933
methyl 3-(6-((4-formylpiperazin-1-yl)methyl)-3-hydroxy-4-oxo-4H-pyran-2-yl)-3-(4-((1-methyl-1H-imidazol-2-yl)methoxy)phenyl)propanoate	8.60765	533.209	533.2	C26H30N4O7	Imidazolyl carboxylic acids and derivatives	SBFHGLOFVRNGAB-UHFFFAOYSA-N	O=CN1CCN(CC=2OC(=C(O)C(=O)C2)C(C3=CC=C(OCC4=NC=CN4C)C=C3)CC(=O)OC)CC1	16.2978	76.8	46.9642
Methylophiopogonanone A	15.6656	365.105	365.1	C19H18O6	Homoisoflavanones	BXTNNJIQILYHJB-GFCCVEGCSA-N	O=C1C=2C(O)=C(C(O)=C(C2OCC1CC3=CC=C4OCOC4=C3)C)C	13.3936	73.9	13.2686
Methylophiopogonone A	17.1958	363.077	363.08	C19H16O6	Homoisoflavones	AUTZLTCWRDPAPV-UHFFFAOYSA-N	O=C1C=2C(O)=C(C(O)=C(C2OC=C1CC3=CC=C4OCOC4=C3)C)C	9.06136	51.9	51.9523
Miltirone	10.6917	305.152	305.15	C19H22O2	Tanshinones, isotanshinones, and derivatives	FEFAIBOZOKSLJR-UHFFFAOYSA-N	O=C1C(=O)C(=CC=2C=CC3=C(C21)CCCC3(C)C)C(C)C	6.58692	66.3	21.6033
mollugin	11.6801	307.097	307.1	C17H16O4	Naphthopyrans	VLGATXOTCNBWIT-UHFFFAOYSA-N	O=C(OC)C=1C(O)=C2C=CC=CC2=C3OC(C=CC31)(C)C	9.80137	67.8	10.1258
Myristamidopropyl betaine	11.9307	371.324	371.327	[C21H43N2O3]+	Alpha amino acids	QGCUAFIULMNFPJ-UHFFFAOYSA-O	CCCCCCCCCCCCCC(=O)NCCC[N+](C)(C)CC(O)=O	7.02885	81.5	11.7148
NCGC00347704-02_C24H32O7_2H-Oxireno[1,10a]phenanthro[3,2-b]furan-10(11bH)-one, 5,7-bis(acetyloxy)-3,3a,4,5,6,7,7a,7b,8,8a-decahydro-4,4,7a,11-tetramethyl-, (1aS,3aR,5S,7S,7aR,7bS,8aR,11bR)-	1.89345	415.21	415.212	C24H32O7	Naphthofurans	YOELDOOOBJSHSZ-SRFZOMHBSA-N	CC(=O)O[C@H]1C[C@H](OC(C)=O)[C@]2(C)[C@H](CC[C@@]34O[C@@H]3C/5=C(C)/C(=O)O[C@@H]5C[C@@H]24)C1(C)C	3.66078	76.4	8.84507
NCGC00385079-01_C19H34O7_4-(4-Hydroxy-2,6,6-trimethyl-1-cyclohexen-1-yl)-2-butanyl beta-D-glucopyranoside	10.9557	397.218	397.22	C19H34O7	Fatty acyl glycosides of mono- and disaccharides	QOLJILMTPKQQQA-KWEBYEANSA-N	CC(CCC/1=C(C)/CC(O)CC1(C)C)O[C@@H]2O[C@H](CO)[C@@H](O)[C@H](O)[C@H]2O	5.21122	58.1	55.786
Nebularine	16.1351	253.092	253.093	C10H12N4O4	Purine nucleosides	MRWXACSTFXYYMV-UHFFFAOYSA-N	C1=C2C(=NC=N1)N(C=N2)C3C(C(C(O3)CO)O)O	5.61058	50.9	18.8778
n-methyl-2,4-dihydroxy-3-phenylquinoline	10.1278	274.085	274.08	C16H13NO2	Phenylquinolines	CLKIYIWKKBDFBS-UHFFFAOYSA-N	O=C1C(C=2C=CC=CC2)=C(O)C=3C=CC=CC3N1C	17.5496	61	9.49661
NPE_228.1019_12.4	7.87033	228.104	228.102	C14H13NO2	Phenylpropanoic acids	XTQOUVPIWQGVEJ-UHFFFAOYSA-N	OC(=O)CC(C1=CC=CC=C1)C1=NC=CC=C1	8.32961	50.8	5.51786
Octaethylene glycol	12.0186	393.205	393.209	C16H34O9	Polyethylene glycols	GLZWNFNQMJAZGY-UHFFFAOYSA-N	OCCOCCOCCOCCOCCOCCOCCOCCO	10.6813	82.8	9.6158
palythine	18.0292	245.114	245.113	C10H16N2O5	Alpha amino acids and derivatives	KYCBIRYKYQCBFO-UHFFFAOYSA-N	COC1=C(CC(CC1=NCC(=O)O)(CO)O)N	5.30367	73.5	22.4515
Panaxadiol	9.1436	483.377	483.38	C30H52O3	Triterpenoids	PVLHOJXLNBFHDX-XHJPDDKBSA-N	OC1CC2C3(C)CCC(O)C(C)(C)C3CCC2(C)C4(C)CCC(C14)C5(OC(C)(C)CCC5)C	6.41317	62	19.6609
Pantothenic acid	18.7294	220.116	220.118	C9H17NO5	Secondary alcohols	GHOKWGTUZJEAQD-UHFFFAOYSA-N	CC(C)(CO)C(O)C(=O)NCCC(O)=O	7.49598	56.4	7.21797
Peimine	14.5768	454.328	454.33	C27H45NO3	Cerveratrum-type alkaloids	IUKLSMSEHKDIIP-BZMYINFQSA-N	OC1CCC2(C)C(C1)C(O)CC3C4CCC5C(CN6CC(C)CCC6C5(O)C)C4CC32	3.71976	58.1	35.9789
Pentaethylene glycol	9.75302	239.147	239.149	C10H22O6	Polyethylene glycols	JLFNLZLINWHATN-UHFFFAOYSA-N	OCCOCCOCCOCCOCCO	8.40481	63.9	28.83
Phenmedipham	9.69292	301.112	301.118	C16H16N2O4	Phenylcarbamic acid esters	IDOWTHOLJBTAFI-UHFFFAOYSA-N	COC(=O)NC1=CC=CC(OC(=O)NC2=CC(C)=CC=C2)=C1	19.8925	54.8	27.1921
Phenylalanylisoleucine (isomer of 1329)	13.5444	279.169	279.17	C15H22N2O3	Dipeptides	JWBLQDDHSDGEGR-UHFFFAOYSA-N	O=C(O)C(NC(=O)C(N)CC1=CC=CC=C1)C(C)CC	4.01189	53.5	13.4535
phloridzin	11.588	459.124	459.12	C21H24O10	Flavonoid O-glycosides	IOUVKUPGCMBWBT-RQUKQETFSA-N	O=C(C=1C(O)=CC(O)=CC1OC2OC(CO)C(O)C(O)C2O)CCC3=CC=C(O)C=C3	9.14794	62	12.1099
Propoxur	7.79708	210.111	210.112	C11H15NO3	Phenol ethers	ISRUGXGCCGIOQO-UHFFFAOYSA-N	CNC(=O)OC1=CC=CC=C1OC(C)C	9.37593	56.9	8.53915
Putative (3-hydroxyhexadecanoyl)glycine (aka Commendamide)	4.41342	330.261	330.264	C18H35NO4	N-acyl-alpha amino acids	MZUHHHSFDVDBCZ-UHFFFAOYSA-N	OC(CNC(CC(O)CCCCCCCCCCCCC)=O)=O	8.145	52.2	49.4988
RAFFINOSE	17.1099	527.154	527.158	C18H32O16	Oligosaccharides	MUPFEKGTMRGPLJ-BQCSWRFHSA-N	OC[C@H]1O[C@@](CO)(OC2O[C@H](COC3O[C@H](CO)[C@H](O)[C@H](O)[C@H]3O)[C@@H](O)[C@H](O)[C@H]2O)[C@@H](O)[C@@H]1O	8.65015	85.8	32.8943
Seconeokadsuranic acid A	18.5304	491.303	491.31	C30H44O4	Diterpenoids	GXLUGCOZQDLXAJ-KEBDBYFISA-N	O=C(O)C(=CCCC(C)C1C(=C)C2C=C3C(CCC(C(=C)C)C3(C)CCC(=O)O)C2(C)CC1)C	13.2299	54.3	20.1266
securinine	20.3628	240.099	240.1	C13H15NO2	Indolizidines	SWZMSZQQJRKFBP-DMDPSCGWSA-N	O=C1OC23C(C=CC(N4CCCCC42)C3)=C1	4.62307	62.6	9.73287
Sempervirine	19.1217	273.143	273.139	C19H16N2	Beta carbolines	UQVUEULZDJRMJR-UHFFFAOYSA-N	C1CCC2=CC3=C4N=C5C=CC=CC5=C4C=CN3C=C2C1	14.608	62.2	7.66264
Thalsimine	3.15618	637.301	637.291	C38H40N2O7	Tannins	YWNUNVSMOKMJMG-LJAQVGFWSA-N	COC1=C2OC3=CC=C(CC4=NCCC5=CC(OC)=C(OC6=C(OC)C(OC)=C(OC)C7=C6[C@H](CC(C=C1)=C2)N(C)CC7)C=C45)C=C3	16.272	56.1	347.643
Timolol	18.1667	317.168	317.164	C13H24N4O3S	Dialkylarylamines	BLJRIMJGRPQVNF-JTQLQIEISA-N	OC(CNC(C)(C)C)COc(n2)c(ns2)N(C1)CCOC1	11.7289	55.5	7.73557
Tri-isobutylphosphate	3.43728	267.17	267.172	C12H27O4P	Trialkyl phosphates	HRKAMJBPFPHCSD-UHFFFAOYSA-N	O=P(OCC(C)C)(OCC(C)C)OCC(C)C	6.62495	76.6	62.4001
Tri-N-butyl phosphate; CE30; STCOOQWBFONSKY-UHFFFAOYSA-N	3.4403	267.17	267.172	C12H27O4P	Trialkyl phosphates	STCOOQWBFONSKY-UHFFFAOYSA-N	CCCCOP(=O)(OCCCC)OCCCC	6.62495	80.2	79.3509
(R)-4-((3R,5S,7S,8S,9S,10S,13R,14R,17R)-3,7,14-trihydroxy-10,13-dimethylhexadecahydro-1H-cyclopenta[a]phenanthren-17-yl)pentanoic acid	8.9559	431.275	431.277	C24H40O5	Trihydroxy bile acids, alcohols and derivatives	OGSDYCPNYNWUNN-QGGGRKECSA-N	C[C@@H]([C@H]1CC[C@]2(O)[C@]1(C)CC[C@@]3([H])[C@@]2([H])[C@@H](O)C[C@@]4([H])[C@]3(C)CC[C@@H](O)C4)CCC(O)=O	4.38234	99.9	21.9787
2-((4R)-4-((3R,5R,9S,10S,12S,13R,14S,17R)-12-hydroxy-10,13-dimethyl-3-(sulfooxy)hexadecahydro-1H-cyclopenta[a]phenanthren-17-yl)pentanamido)ethane-1-sulfonic acid	21.8604	562.242	562.25	C26H45NO9S2	Taurinated bile acids and derivatives	UCVGCHGIKFWAGH-FCAUSNKHSA-N	[H][C@@]12CC[C@@H]3C[C@H](OS(=O)(O)=O)CC[C@]3(C)[C@H]1C[C@H](O)[C@@]4(C)[C@H]2CC[C@@H]4[C@@H](CCC(NCCS(=O)(O)=O)=O)C	14.7799	98.6	29.8767
2-((4R)-4-((3R,5R,9S,10S,13R,14S,17R)-3-hydroxy-10,13-dimethylhexadecahydro-1H-cyclopenta[a]phenanthren-17-yl)-N-methylpentanamido)ethane-1-sulfonic acid	16.5486	520.304	520.307	C27H47NO5S	Taurinated bile acids and derivatives	MFDHSRQWKNAICJ-JSZKKBQESA-N	[H][C@@]12CC[C@]3([H])C[C@H](O)CC[C@]3(C)[C@H]1CC[C@@]4(C)[C@H]2CC[C@@H]4[C@@H](CCC(N(C)CCS(=O)(O)=O)=O)C	4.61266	99.9	49.5536
2-((4R)-4-((5S,9S,10S,12R,13R,14S,17R)-12-hydroxy-10,13-dimethylhexadecahydro-1H-cyclopenta[a]phenanthren-17-yl)pentanamido)ethane-1-sulfonic acid	16.8712	506.287	506.291	C26H45NO5S	Taurinated bile acids and derivatives	JTTGPCRBDUOCGG-NMRNMTQVSA-N	[H][C@@]12CC[C@]3([H])CCCC[C@]3(C)[C@H]1C[C@@H](O)[C@@]4(C)[C@H]2CC[C@@H]4[C@@H](CCC(NCCS(=O)(O)=O)=O)C	7.26855	99.7	35.4772
(1R,19R,20S)-19-ethenyl-18-{[(2S,3R,4S,5S,6R)-3,4,5-trihydroxy-6-(hydroxymethyl)oxan-2-yl]oxy}-17-oxa-3,13-diazapentacyclo[11.8.0.0?,??.0?,?.0??,??]henicosa-2(10),4(9),5,7,15-pentaen-14-one	10.6948	537.166	537.163	C26H30N2O8	Beta carbolines	LBRPLJCNRZUXLS-YTMAOMSOSA-N	O=C1C2=COC(OC3OC(CO)C(O)C(O)C3O)C(C=C)C2CC4C=5NC=6C=CC=CC6C5CCN14	5.04502	99.9	63.0033
(1R,3aR,5aR,5bR,9S,11aR)-3a,5a,5b,8,8,11a-hexamethyl-1-prop-1-en-2-yl-1,2,3,4,5,6,7,7a,9,10,11,11b,12,13,13a,13b-hexadecahydrocyclopenta[a]chrysen-9-ol	4.42042	449.373	449.375	C30H50O	Triterpenoids	MQYXUWHLBZFQQO-KIIHVYTKSA-N	OC1CCC2(C)C(CCC3(C)C2CCC4C5C(C(=C)C)CCC5(C)CCC43C)C1(C)C	4.22809	99.9	33.0802
(1S,3R,6S,6aR,6bR,8S,9S,11R,11aR,12R,12aR,14R)-1-ethyl-6,8,11-trihydroxy-3-methyl-10-methylenetetradecahydro-3,6a,12-(epiethane[1,1,2]triyl)-9,11a-methanoazuleno[2,1-b]azocine 1-oxide	3.40967	376.255	376.25	C22H33NO4	Kaurane diterpenoids	DEMQJEXKIJFBRD-HQOPBMQXSA-N	[O-][N+]1(CC)CC2(C)CCC(O)C34C2CC(C31)C56CC(C(=C)C5O)C(O)CC64	13.5548	99.5	119.696
(1S,9S,E)-4,11,11-trimethyl-8-methylenebicyclo[7.2.0]undec-4-ene	7.59618	227.181	227.18	C15H24	Sesquiterpenoids	NPNUFJAVOOONJE-BLOBHPOZSA-N	C=C1CCC=C(C)CCC2C1CC2(C)C	5.76635	100	34.4534
(2E)-3-(4-{[(2S,3R,4S,5S,6R)-3-{[(2S,3R,4R)-3,4-dihydroxy-4-(hydroxymethyl)oxolan-2-yl]oxy}-4,5-dihydroxy-6-(hydroxymethyl)oxan-2-yl]oxy}phenyl)-1-(2,4-dihydroxyphenyl)prop-2-en-1-one	8.60497	551.181	551.18	C26H30O13	Flavonoid O-glycosides	VMMVZVPAYFZNBM-KVFWHIKKSA-N	O=C(C=CC1=CC=C(OC2OC(CO)C(O)C(O)C2OC3OCC(O)(CO)C3O)C=C1)C4=CC=C(O)C=C4O	2.37672	100	56.9269
(2E,4E)-N-(2-methylpropyl)-6-thiophen-2-ylhexa-2,4-dienamide	7.75482	272.11	272.108	C14H19NOS	N-acyl amines	KNGBXFMEGLRFHV-PRKJJMSOSA-N	OC(=NCC(C)C)C=CC=CCC=1SC=CC1	7.57053	99.9	22.0677
(2E,4E,8E)-7,13-dihydroxy-4,8,12-trimethyltetradeca-2,4,8-trienoic acid	14.0137	314.23	314.233	C17H28O4	Sesquiterpenoids	RCKDDMWGRIYLCN-WRHFRISWSA-N	O=C(O)C=CC(=CCC(O)C(=CCCC(C)C(O)C)C)C	8.49689	99.9	53.6484
(2R)-6-methylpiperidine-2-carboxylic acid	20.9808	144.099	144.1	C7H13NO2	L-alpha-amino acids	IHLDCUQUFBWSJU-PRJDIBJQSA-N	O=C(O)C1NC(C)CCC1	8.39695	100	214.072
(2R,3R,4S,5R,6R)-2-(acetoxymethyl)-6-((3-(benzo[d][1,3]dioxol-5-yl)-6-ethyl-4-oxo-4H-chromen-7-yl)oxy)tetrahydro-2H-pyran-3,4,5-triyl triacetate	7.67788	641.183	641.18	C32H32O14	Isoflavonoid O-glycosides	NDEVARCRJOYXJL-ICLVLUFYSA-N	O=C(OCC1OC(OC2=CC=3OC=C(C(=O)C3C=C2CC)C=4C=CC=5OCOC5C4)C(OC(=O)C)C(OC(=O)C)C1OC(=O)C)C	5.16236	99.8	29.41
(2R,3S,4S,5R,6R)-2-(hydroxymethyl)-6-[[(2R,3S,4S,5R,6S)-3,4,5-trihydroxy-6-[4-[(E)-3-hydroxyprop-1-enyl]-2,6-dimethoxyphenoxy]oxan-2-yl]methoxy]oxane-3,4,5-triol	8.60765	535.2	535.202	C23H34O14	Phenolic glycosides	ZCKITOSCNKNMMO-YQHZJLNZSA-N	OCC=CC1=CC(OC)=C(OC2OC(COC3OC(CO)C(O)C(O)C3O)C(O)C(O)C2O)C(OC)=C1	4.39086	99.9	20.0668
(2S,3S,4S,5R,6S)-3,4,5-trihydroxy-6-(5-hydroxy-4-oxo-2-phenylchromen-7-yl)oxyoxane-2-carboxylic acid	17.149	453.073	453.079	C21H18O10	Flavonoid-7-O-glucuronides	IDRSJGHHZXBATQ-ZFORQUDYSA-N	O=C(O)C1OC(OC2=CC(O)=C3C(=O)C=C(OC3=C2)C=4C=CC=CC4)C(O)C(O)C1O	14.1697	99.2	31.7632
(3R,5S,17R)-3-hydroxy-10,13-dimethylhexadecahydro-1H-cyclopenta[a]phenanthren-17-aminium chloride	18.8505	350.225	350.22	C19H34ClNO	Androgens and derivatives	QUJWGPKTCDNZHS-YHGFUEDJSA-N	[Cl-].OC1CCC2(C)C(CCC3C4CCC([NH3+])C4(C)CCC32)C1	15.4189	99.4	33.7165
(3S,3'R)-3'-(3-hydroxyphenyl)-4-methylspiro[1H-1,4-benzodiazepine-3,2'-oxirane]-2,5-dione	15.6236	333.083	333.085	C17H14N2O4	1,4-benzodiazepines	BDDNYDPRCCDQQJ-PBHICJAKSA-N	O=C1C=2C=CC=CC2N=C(O)C3(OC3C=4C=CC=C(O)C4)N1C	5.28394	99.9	257.099
(3S,4S,5R)-4-[(2R,3R)-2,3-dihydroxy-3-[(2S,3R,5R,10R,13R,14S,17S)-2,3,14-trihydroxy-10,13-dimethyl-6-oxo-2,3,4,5,9,11,12,15,16,17-decahydro-1H-cyclopenta[a]phenanthren-17-yl]butyl]-3,5-dimethyloxolan-2-one	10.0778	538.347	538.337	C29H44O8	Triterpenoids	NEFYSBQJYCICOG-RJRZVDSCSA-N	O=C1OC(C)C(CC(O)C(O)(C)C2CCC3(O)C4=CC(=O)C5CC(O)C(O)CC5(C)C4CCC23C)C1C	17.164	98.3	28.8333
(9bR)-2,6-diacetyl-7,9-dihydroxy-8,9b-dimethyldibenzo[b,d]furan-1,3(2H,9bH)-dione	13.9734	367.08	367.08	C18H16O7	Acetophenones	CUCUKLJLRRAKFN-MCEAHNFKSA-N	O=C(C=1C(O)=C(C(O)=C2C1OC3=CC(=O)C(C(=O)C)C(=O)C32C)C)C	0.572082	100	81.7946
(dehydrohexadecanoyl)glycine - Commendamide analogue	4.20912	312.25	312.253	C18H33NO3	N-acyl-alpha amino acids	XPLOWAHHERZGRC-CCEZHUSRSA-N	O=C(C=CCCCCCCCCCCCCC)NCC(=O)O	10.0239	99.8	192.395
(NAG)(DAM)-AelAG	8.4019	529.193	529.198	C40H64N8O23S	Polypeptides	KRBOJXZSNWQLAN-UHFFFAOYSA-N	CC(=O)NC1C(OC2C(COC(C)=O)OC(O)C(NC(C)=O)C2OC(C)C(=O)NC(C)C(=O)NC(CCC(=O)NC(CSCC(N)C(=O)O)C(=O)NC(C)C(=O)NCC(=O)O)C(=O)O)OC(CO)C(O)C1O	8.7113	99.6	23.6223
(NAG)(MUR)-Aqm(NH2)	10.9557	413.195	413.195	C32H56N8O17	Dipeptides	JLOXQFYAIZTASO-UHFFFAOYSA-N	CC(=O)NC1C(OC2C(CO)OC(O)C(N)C2OC(C)C(=O)NC(C)C(=O)NC(CCC(=O)NC(CCCC(N)C(N)=O)C(=O)O)C(N)=O)OC(CO)C(O)C1O	0.798654	100	25.8571
(NAG)(NAM)-AqKA[3-NH2-GGSGG]	19.1999	605.766	605.775	C47H79N13O24	Polypeptides	VCYLOYMVPCIDQK-UHFFFAOYSA-N	CC(=O)NC1C(OC2C(CO)OC(O)C(NC(C)=O)C2OC(C)C(=O)NC(C)C(=O)NC(CCC(=O)NC(CCCCNC(=O)CNC(=O)CNC(=O)C(CO)NC(=O)CNC(=O)CN)C(=O)NC(C)C(=O)O)C(N)=O)OC(CO)C(O)C1O	15.0716	98.4	35.2836
(NAG)(NAM)-AqOAG[3-NH2-SATA]	19.2396	634.808	634.796	C50H85N13O25	Polypeptides	YESMDSINNDUEQF-UHFFFAOYSA-N	CC(=O)NC1C(OC2C(CO)OC(O)C(NC(C)=O)C2OC(C)C(=O)NC(C)C(=O)NC(CCC(=O)NC(CCCNC(=O)C(CO)NC(=O)C(C)NC(=O)C(NC(=O)C(C)N)C(C)O)C(=O)NC(C)C(=O)NCC(=O)O)C(N)=O)OC(CO)C(O)C1O	18.4941	97.3	31.3291
[(2R,3S,4S,5R,6S)-3,4,5-trihydroxy-6-[(E)-3-phenylprop-2-enoyl]oxyoxan-2-yl]methyl 3,4-dihydroxy-2-methylidenebutanoate	12.0038	463.1	463.1	C20H24O10	Saccharolipids	MYWZGSROPRXVPM-AUMMCNCRSA-N	O=C(OC1OC(COC(=O)C(=C)C(O)CO)C(O)C(O)C1O)C=CC=2C=CC=CC2	0	100	31.0231
[3,4,5-trihydroxy-6-(3,4,5-trihydroxybenzoyl)oxyoxan-2-yl]methyl 3,4,5-trihydroxybenzoate	14.8038	523.046	523.048	C20H20O14	Tannins	LYGRISUQIZNHGM-UHFFFAOYSA-N	O=C(OCC1OC(OC(=O)C2=CC(O)=C(O)C(O)=C2)C(O)C(O)C1O)C3=CC(O)=C(O)C(O)=C3	4.32082	99.9	88.6141
1-(2-(1H-indol-3-yl)ethyl)thiourea	10.8566	242.073	242.07	C11H13N3S	3-alkylindoles	HRBGONPRSGPFMT-UHFFFAOYSA-N	S=C(N)NCCC1=CNC=2C=CC=CC21	12.3518	99.8	32.88
1-(3-(Trifluoromethyl)phenyl)piperazine	16.1656	231.109	231.11	C11H13F3N2	Phenylpiperazines	KKIMDKMETPPURN-UHFFFAOYSA-N	c1c(C(F)(F)F)cccc1N1CCNCC1	4.19713	100	31.3228
1-(4-(trifluoromethyl)phenyl)isoquinoline	9.77908	274.085	274.084	C16H10F3N	Phenylpyridines	GVPOXQWXNHAESS-UHFFFAOYSA-N	FC(F)(F)C(C=C1)=CC=C1C2=NC=CC3=CC=CC=C32	3.64852	100	24.4257
1,4a-dimethyl-9-oxo-7-propan-2-yl-3,4,10,10a-tetrahydro-2H-phenanthrene-1-carboxylic acid	3.9445	332.221	332.222	C20H26O3	Diterpenoids	MSWJSDLNPCSSNW-UHFFFAOYSA-N	O=C(O)C1(C)CCCC2(C3=CC=C(C=C3C(=O)CC12)C(C)C)C	2.46823	100	48.2028
13-(acetyloxy)-1,6-dihydroxy-8-(hydroxymethyl)-4,12,12,15-tetramethyl-5-oxotetracyclo[8.5.0.0?,?.0??,??]pentadeca-3,8-dien-14-yl (2E)-2-methylbut-2-enoate	8.60562	527.197	527.204	C27H36O8	Phorbol esters	PCASZNXKLGTEGB-MDWZMJQESA-N	O=C(OC1C(C)C2(O)C(C=C(CO)CC3(O)C(=O)C(=CC32)C)C4C1(OC(=O)C)C4(C)C)C(=CC)C	13.5811	99	20.3768
15-Monoacetoxyscirpenol	18.8098	342.198	342.191	C17H24O6	Trichothecenes	IRXDUBNENLKYTC-UHFFFAOYSA-N	CC1=CC2C(CC1)(C3(C(C(C(C34CO4)O2)O)O)C)COC(=O)C	19.2875	99.1	67.155
1-8-diaminooctane	18.91	145.172	145.17	C8H20N2	Monoalkylamines	PWGJDPKCLMLPJW-UHFFFAOYSA-N	NCCCCCCCCN	17.0834	99.9	20.2469
19,20-dihydrousambarensine	19.1678	435.254	435.254	C29H30N4	Harmala alkaloids	QODPASWLKWJHBB-PTORSQSXSA-N	[H][C@@]12C[C@@](CC3=NC=CC4=C3NC5=C4C=CC=C5)([H])C(CC)CN1CCC6=C2NC7=C6C=CC=C7	0.987928	100	100.489
1-AMINOCYCLOPROPANE-1-CARBOXYLATE	16.6103	102.055	102.055	C4H7NO2	Alpha amino acids	PAJPWUMXBYXFCZ-UHFFFAOYSA-N	C1CC1(C(=O)O)N	4.40939	100	61.7766
1-hydroxypyrene	11.878	219.081	219.08	C16H10O	Pyrenes	BIJNHUAPTJVVNQ-UHFFFAOYSA-N	Oc4ccc2ccc1cccc3c1c2c4cc3	3.46905	100	39.8103
2-(2-amino-4-hydroxy-6-methylpyrimidin-5-yl)acetic acid	21.1088	206.052	206.05	C7H9N3O3	Pyrimidones	RJXQOURJIQZYIP-UHFFFAOYSA-N	O=C(O)CC1=C(O)N=C(N=C1C)N	7.76511	99.9	39.2097
2-(4-aminotetrahydro-2H-pyran-4-yl)acetic acid	14.7533	182.08	182.08	C7H13NO3	Pyranoid amino acids and derivatives	QRIAWCUEIMQLGG-UHFFFAOYSA-N	O=C(O)CC1(N)CCOCC1	2.19684	100	32.2871
2,4-bis(3-methylbut-2-enyl)-5-(2-phenylethyl)benzene-1,3-diol	18.8468	373.214	373.214	C24H30O2	Stilbenes	PHPXAJCVSGIDFH-UHFFFAOYSA-N	OC=1C=C(C(=C(O)C1CC=C(C)C)CC=C(C)C)CCC=2C=CC=CC2	1.31292	100	38.0772
2,6-Di-tert-butylpyridine	20.025	192.177	192.175	C13H21N	Pyridines and derivatives	UWKQJZCTQGMHKD-UHFFFAOYSA-N	CC(C)(C)C1=NC(=CC=C1)C(C)(C)C	10.5113	99.9	275.573
2,6-Xylidine	4.45168	122.096	122.096	C8H11N	m-Xylenes	UFFBMTHBGFGIHF-UHFFFAOYSA-N	CC1=CC=CC(C)=C1N	7.61693	100	23.8747
2-amino-4-hydroxypyrimidine-5-carboxylic acid	19.8057	156.041	156.04	C5H5N3O3	Pyrimidinecarboxylic acids	GBADBFAXAWZGHM-UHFFFAOYSA-N	O=C(O)C1=CN=C(N=C1O)N	3.90925	100	44.0965
2-chloro-4-fluoro-N-[(E)-2-phenylethenyl]sulfonylbenzamide	21.5492	340.023	340.021	C15H11ClFNO3S	4-halobenzoic acids and derivatives	AUMLVMKWJGCERZ-CMDGGOBGSA-N	O=C(NS(=O)(=O)/C=C/c1ccccc1)c1ccc(F)cc1Cl	6.73489	99.9	40.0735
2'-Deoxyinosine-5'-monophosphate	19.8057	333.058	333.059	C10H13N4O7P	Purine 2'-deoxyribonucleoside monophosphates	PHNGFPPXDJJADG-RRKCRQDMSA-N	OC(C1)C(COP(O)(O)=O)OC1n(c3)c(N2)c(n3)C(=O)N=C2	3.45284	100	52.7292
2-Guanidinobenzimidazole	16.3249	176.092	176.093	C8H9N5	Benzimidazoles	JJWCTKUQWXYIIU-UHFFFAOYSA-N	C1=CC=C2C(=C1)NC(=N2)N=C(N)N	4.99736	100	40.6267
2-hydroxy-6-methylisonicotinic acid	11.6801	176.032	176.03	C7H7NO3	Pyridinecarboxylic acids	NQXYVTIQDNOHFM-UHFFFAOYSA-N	O=C(O)C=1C=C(O)N=C(C1)C	13.066	99.9	308.834
2-Methyl-1,2,3,4-tetrahydro-beta-carboline	16.1656	187.12	187.123	C12H14N2	Beta carbolines	JOFKCNJIUXPJAC-UHFFFAOYSA-N	CN1CCC2=C(C1)NC3=CC=CC=C23	14.8031	99.8	138.627
2-Methylpyrrolidine; CE0; RGHPCLZJAFCTIK-UHFFFAOYSA-N	14.9322	86.0965	86.0964	C5H11N	Pyrrolidines	RGHPCLZJAFCTIK-UHFFFAOYSA-N	CC1CCCN1	0.813042	100	46.8575
2-Palmitoylglycerol	3.57825	331.286	331.284	C19H38O4	2-monoacylglycerols	BBNYCLAREVXOSG-UHFFFAOYSA-N	O=C(OC(CO)CO)CCCCCCCCCCCCCCC	3.71282	100	87.122
2-ureidopentanedioic acid	20.1361	191.07	191.07	C6H10N2O5	Glutamic acid and derivatives	LCQLHJZYVOQKHU-UHFFFAOYSA-N	O=C(N)NC(C(=O)O)CCC(=O)O	0.0523368	100	39.4239
3-((3a'S,6a'R)-5,7-dimethyl-2,4',6'-trioxo-5'-phenethyl-3',3a',4',5',6',6a'-hexahydro-2'H-spiro[indoline-3,1'-pyrrolo[3,4-c]pyrrol]-3'-yl)propanamide	15.5566	483.201	483.2	C26H28N4O4	Alpha amino acid amides	JLRMLSBSAUWVEO-FOXWCKEESA-N	O=C(N)CCC1NC2(C(=O)NC=3C(=CC(=CC32)C)C)C4C(=O)N(C(=O)C14)CCC=5C=CC=CC5	2.6697	100	29.6754
3-(2-amino-2-oxoethyl)-5-methyl-hexanoic acid	10.9557	210.111	210.11	C9H17NO3	Medium-chain fatty acids	NPDKTSLVWGFPQG-UHFFFAOYSA-N	NC(CC(CC(C)C)CC(O)=O)=O	2.09414	100	704.599
3-(benzo[d][1,3]dioxol-5-yl)-6-ethyl-2-methyl-4-oxo-4H-chromen-7-yl acetate	18.8468	389.104	389.1	C21H18O6	Isoflavones	WAZQKBSNIFTXNV-UHFFFAOYSA-N	O=C(OC1=CC=2OC(=C(C(=O)C2C=C1CC)C=3C=CC=4OCOC4C3)C)C	9.48342	99.7	47.7665
3,5-Dibromo-L-tyrosine	22.8259	337.907	337.902	C9H9Br2NO3	Tyrosine and derivatives	COESHZUDRKCEPA-ZETCQYMHSA-N	OC(=O)[C@@H](N)Cc(c1)cc(Br)c(O)c(Br)1	13.0511	99.6	36.222
3,5-DIIODO-L-THYRONINE	11.0476	525.894	525.901	C15H13I2NO4	Phenylalanine and derivatives	ZHSOTLOTTDYIIK-ZDUSSCGKSA-N	C1=CC(=CC=C1O)OC2=C(C=C(C=C2I)C[C@@H](C(=O)O)N)I	12.3597	99.2	24.2581
3-hydroxy-C14 homoserine lactone	13.784	328.25	328.248	C18H33NO4	N-acyl-alpha amino acids and derivatives	IKQUESGRCDRZTI-UHFFFAOYSA-N	CCCCCCCCCCCC(O)CC(=O)NC1CCOC1=O	6.9155	99.9	72.603
3-METHOXYTYROSINE	14.9322	212.089	212.092	C10H13NO4	Tyrosine and derivatives	PFDUUKDQEHURQC-UHFFFAOYSA-N	COC1=CC(CC(N)C(O)=O)=CC=C1O	15.2764	99.8	63.138
3-METHYGLUTARIC ACID	19.616	147.065	147.065	C6H10O4	Methyl-branched fatty acids	XJMMNTGIMDZPMU-UHFFFAOYSA-N	O=C(O)CC(C)CC(=O)O	0.611974	100	26.7726
3-METHYL-2-OXINDOLE	13.9292	170.054	170.058	C9H9NO	Indolines	BBZCPUCZKLTAJQ-UHFFFAOYSA-N	CC1C2=CC=CC=C2NC1=O	18.9936	99.8	31.8042
4-(5-(1-(2,4-dihydroxy-6-methylpyridin-3-yl)-3-methoxy-3-oxopropyl)furan-2-yl)benzoic acid	15.7361	398.118	398.12	C21H19NO7	Benzoic acids	LUULUSZGAPNFFC-UHFFFAOYSA-N	O=C(O)C=1C=CC(=CC1)C=2OC(=CC2)C(C3=C(O)N=C(C=C3O)C)CC(=O)OC	4.77243	99.9	23.1871
4-(Methylsulfinyl)but-3-enylglucosinolate	22.253	473.995	473.996	C12H21NO10S3	Alkylglucosinolates	ZFLXCZJBYSPSKU-HFUPMICZSA-N	OC[C@@H](O1)[C@@H](O)[C@H](O)[C@@H](O)[C@@H]1SC(CCC=CS(C)=O)=NOS(O)(=O)=O	0.864986	100	67.1497
4,9-dimethoxy-7-(perfluorobutyl)-5H-furo[3,2-g]chromen-5-one	22.4182	465.038	465.04	C17H9F9O5	Furanochromones	BVUOXVSHTGNMRR-UHFFFAOYSA-N	O=C1C=C(OC=2C(OC)=C3OC=CC3=C(OC)C12)C(F)(F)C(F)(F)C(F)(F)C(F)(F)F	3.6771	99.9	39.4739
4-[(E)-2-[(1R,4aS,5R,6R,8aR)-6-hydroxy-5-(hydroxymethyl)-5,8a-dimethyl-2-methylidene-3,4,4a,6,7,8-hexahydro-1H-naphthalen-1-yl]ethenyl]-2H-furan-5-one	4.40635	350.232	350.233	C20H28O4	Diterpene lactones	XMJAJFVLHDIEHF-CRBRZBHVSA-N	O=C1OCC=C1C=CC2C(=C)CCC3C(C)(CO)C(O)CCC23C	1.91301	100	31.0447
4-[(E)-3-hydroxy-8,10-dimethyl-2-(methylamino)dodec-6-enyl]phenol	8.26158	356.252	356.256	C21H35NO2	Amphetamines and derivatives	RNCWKUCWPBNWOH-SOFGYWHQSA-N	OC1=CC=C(C=C1)CC(NC)C(O)CCC=CC(C)CC(C)CC	12.3787	99.6	20.5111
4-[[4-hydroxy-2-(2-methylpropyl)-1-oxo-3,3a-dihydro-2H-imidazo[1,2-a]indol-4-yl]methyl]-1-methyl-2,4-dihydro-1H-pyrazino[2,1-b]quinazoline-3,6-dione	10.7108	526.189	526.185	C27H29N5O4	Quinazolines	XQIGVMVJGPFNDE-UHFFFAOYSA-N	O=C1C=2C=CC=CC2N=C3N1C(C(O)=NC3C)CC4(O)C=5C=CC=CC5N6C(=O)C(NC64)CC(C)C	7.37383	99.7	26.2133
4-ACETAMIDOBUTANOATE	14.7779	168.064	168.063	C6H11NO3	Gamma amino acids and derivatives	UZTFMUBKZQVKLK-UHFFFAOYSA-N	CC(=O)NCCCC(=O)O	2.32056	100	28.8472
4-AMINOBUTANOATE	16.7344	104.07	104.071	C4H9NO2	Gamma amino acids and derivatives	BTCSSZJGUNDROE-UHFFFAOYSA-N	C(CC(=O)O)CN	4.80443	100	25.874
4-Aminohippurate	20.8282	195.077	195.076	C9H10N2O3	Hippuric acids	HSMNQINEKMPTIC-UHFFFAOYSA-N	C1=CC(=CC=C1C(=O)NCC(=O)O)N	2.46057	100	23.094
4-Aminomethylcyclohexanecarboxylic acid	18.8023	158.117	158.118	C8H15NO2	Amino acids	GYDJEQRTZSCIOI-LJGSYFOKSA-N	O=C(O)C1CCC(CN)CC1	0.948661	100	28.6804
4-aminovaleric acid betaine; CE0; RXHVPPWXTMHWGY-UHFFFAOYSA-N	14.9044	160.134	160.133	C8H17NO2	NA	RXHVPPWXTMHWGY-UHFFFAOYSA-N	CC(CCC(=O)[O-])[N+](C)(C)C	6.18235	100	3071.62
4'-Demethylepipodophyllotoxin	22.0781	401.125	401.124	C21H20O8	Podophyllotoxins	YVCVYCSAAZQOJI-JHQYFNNDSA-N	O=C1OCC2C(O)C3=CC=4OCOC4C=C3C(C5=CC(OC)=C(O)C(OC)=C5)C12	2.51792	100	366.54
4-GUANIDINOBUTANOATE	22.1167	168.077	168.074	C5H11N3O2	Gamma amino acids and derivatives	TUHVEAJXIMEOSA-UHFFFAOYSA-N	NC(N)=NCCCC(O)=O	15.8263	99.9	26.8654
4H-cyclopenta[def]phenanthrene-4-one	13.3747	205.065	205.065	C15H8O	Phenanthrenes and derivatives	IFCBMPOMNSORDG-UHFFFAOYSA-N	O=C4c2cccc1ccc3c(c12)c4ccc3	0.536416	100	23.195
4-Hydroxyproline; CE0; PMMYEEVYMWASQN-DMTCNVIQSA-N	17.6981	132.064	132.066	C5H9NO3	Proline and derivatives	PMMYEEVYMWASQN-DMTCNVIQSA-N	C1[C@H](CN[C@@H]1C(=O)O)O	13.0238	99.9	84.9571
4-methyl-N-(((1S,9aR)-octahydro-1H-quinolizin-1-yl)methyl)-2-phenylthiazole-5-carboxamide	18.9216	370.194	370.194	C21H27N3OS	Quinolizines	CDDYZYIBFIQEGM-ZWKOTPCHSA-N	O=C(NCC1CCCN2CCCCC21)C=3SC(=NC3C)C=4C=CC=CC4	0.540257	100	40.4641
4-PYRIDOXATE	13.9604	206.042	206.042	C8H9NO4	Pyridinecarboxylic acids	HXACOUQIXZGNBF-UHFFFAOYSA-N	CC1=NC=C(C(=C1O)C(=O)O)CO	3.7371	100	43.7593
5,6-Dihydro-5-methyluracil	18.9698	129.066	129.066	C5H8N2O2	Hydropyrimidines	NBAKTGXDIBVZOO-UHFFFAOYSA-N	OC=1N=C(O)C(C)CN1	2.01448	100	131.84
5,7-dihydroxy-2-(2-hydroxyphenyl)-3-(((2R,3S,4R,5R,6S)-3,4,5-trihydroxy-6-((((2R,3S,4S,5S,6S)-3,4,5-trihydroxy-6-methyltetrahydro-2H-pyran-2-yl)oxy)methyl)tetrahydro-2H-pyran-2-yl)oxy)-4H-chromen-4-on e	11.6619	617.156	617.15	C27H30O15	Flavonoid-3-O-glycosides	BJJCTXDEJUWVIC-RGLPBSMOSA-N	O=C1C(OC2OC(COC3OC(C)C(O)C(O)C3O)C(O)C(O)C2O)=C(OC=4C=C(O)C=C(O)C14)C=5C=CC=CC5O	10.3378	99.2	24.2075
5,7-dihydroxy-8-(1-(2-hydroxyquinolin-3-yl)-3-(4-methylpiperazin-1-yl)-3-oxopropyl)-2-phenyl-4H-chromen-4-one	15.6401	574.183	574.19	C32H29N3O6	Flavones	IIJUXCHFDCTCAH-UHFFFAOYSA-N	O=C1C=C(OC=2C1=C(O)C=C(O)C2C(C=3C=C4C=CC=CC4=NC3O)CC(=O)N5CCN(C)CC5)C=6C=CC=CC6	12.8877	98.9	33.3492
5'-DEOXYADENOSINE	10.1669	274.091	274.091	C10H13N5O3	5'-deoxyribonucleosides	XGYIMTFOTBMPFP-KQYNXXCUSA-N	C[C@H]1O[C@H]([C@H](O)[C@@H]1O)N1C=NC2=C(N)N=CN=C12	1.67827	100	33.1392
5-HYDROXYLYSINE	17.7229	145.097	145.097	C6H14N2O3	Alpha amino acids	YSMODUONRAFBET-UHNVWZDZSA-N	NC[C@H](O)CC[C@H](N)C(O)=O	0.344597	100	28.4001
5-isopropenyl-2-methyl-2-cyclohexen-1-yl acetate	18.6606	217.117	217.12	C12H18O2	Menthane monoterpenoids	YTHRBOFHFYZBRJ-VXGBXAGGSA-N	O=C(OC1C(=CCC(C(=C)C)C1)C)C	15.199	99.8	52.8213
5-Methylbenzotriazole	9.55105	134.071	134.071	C7H7N3	Benzotriazoles	LRUDIIUSNGCQKF-UHFFFAOYSA-N	N1=NC=2C=CC(=CC2N1)C	0.969634	100	24.023
5-VALEROLACTONE	17.4962	101.059	101.06	C5H8O2	Delta valerolactones	OZJPLYNZGCXSJM-UHFFFAOYSA-N	C1CCOC(=O)C1	9.99409	100	23.1466
6,7-dimethoxy-quinazoline-2,4-diol	9.07747	223.069	223.07	C10H10N2O4	Quinazolines	KWNQIIMVPSMYEM-UHFFFAOYSA-N	OC=1N=C(O)C=2C=C(OC)C(OC)=CC2N1	6.32089	100	38.4376
6-Bromo-2(1H)-quinolinone	2.77895	223.973	223.971	C9H6BrNO	Hydroquinolones	YLAFBGATSQRSTB-UHFFFAOYSA-N	BrC1=CC2=C(NC(=O)C=C2)C=C1	9.59948	99.9	32.895
6-methyl-2-thiouracil	15.3051	143.028	143.027	C5H6N2OS	Pyrimidones	HWGBHCRJGXAGEU-UHFFFAOYSA-N	Cc1cc(=O)[nH]c(=S)[nH]1	3.7755	100	20.0126
7-[(2S,3R,4S,5S,6R)-4,5-dihydroxy-6-(hydroxymethyl)-3-[(2S,3R,4R,5R,6S)-3,4,5-trihydroxy-6-methyloxan-2-yl]oxyoxan-2-yl]oxy-5-hydroxy-2-(4-hydroxyphenyl)-3-[(2S,3R,4S,5S,6R)-3,4,5-trihydroxy-6-[[(2S,3R,4R,5R,6S)-3,4,5-trihydroxy-6-methyloxan-2-yl]oxymethyl]oxan-2-yl]oxychromen-4-one	3.087	925.271	925.258	C39H50O24	Flavonoid-7-O-glycosides	UKLPMOHKLUPGON-JEXZMAAQSA-N	O=C1C(OC2OC(COC3OC(C)C(O)C(O)C3O)C(O)C(O)C2O)=C(OC4=CC(OC5OC(CO)C(O)C(O)C5OC6OC(C)C(O)C(O)C6O)=CC(O)=C14)C=7C=CC(O)=CC7	14.0285	96.7	27.1016
8-acetamido-2-methyl-7-oxononanoic acid	10.7271	266.132	266.136	C12H21NO4	Medium-chain fatty acids	UALLEVOGEQZKSX-UHFFFAOYSA-N	O=C(O)C(C)CCCCC(=O)C(N=C(O)C)C	15.7438	99.7	23.7973
8phiC8SPC	9.57537	301.112	301.11	C14H20O5S	Benzenesulfonic acids and derivatives	KCKCVKAROJRVBA-UHFFFAOYSA-N	OS(=O)(=O)c1ccc(CCCCCCCC(=O)O)cc1	4.94835	100	36.772
8-Shogaol	18.8648	327.188	327.19	C19H28O3	Shogaols	LGZSMXJRMTYABD-MDZDMXLPSA-N	O=C(C=CCCCCCCC)CCC1=CC=C(O)C(OC)=C1	7.02955	99.9	72.4732
Abiraterone (CB-7598)	4.08252	350.245	350.248	C24H31NO	Androgens and derivatives	GZOSMCIZMLWJML-APXSMTNNSA-N	C1[C@@H](CC2[C@](C1)([C@]3([C@@](CC=2)([C@]4([C@](CC3)(C(=CC4)C5=CN=CC=C5)C)[H])[H])[H])C)O	8.36551	99.8	45.2028
ACARBOSE	3.1109	684.204	684.211	C25H43NO18	Aminocyclitol glycosides	CEMXHAPUFJOOSV-UHFFFAOYSA-N	O=CC(O)C(O)C(OC1OC(CO)C(OC2OC(C)C(NC3C=C(CO)C(O)C(O)C3O)C(O)C2O)C(O)C1O)C(O)CO	10.3477	99.5	110.223
Acetaminophen; CE0; RZVAJINKPMORJF-UHFFFAOYSA-N	18.902	152.071	152.071	C8H9NO2	1-hydroxy-2-unsubstituted benzenoids	RZVAJINKPMORJF-UHFFFAOYSA-N	CC(=Nc1ccc(cc1)O)O	0.657589	100	20.0613
ACETOACETATE	20.8077	103.039	103.039	C4H6O3	Short-chain keto acids and derivatives	WDJHALXBUFZDSR-UHFFFAOYSA-N	CC(=O)CC(=O)O	4.17318	100	27.9291
Acetylcarnitine; CE0; RDHQFKQIGNGIED-UHFFFAOYSA-N	20.2463	204.121	204.123	C9H18NO4	Acyl carnitines	RDHQFKQIGNGIED-UHFFFAOYSA-N	CC(=O)OC(CC(=O)[O-])C[N+](C)(C)C	7.98538	99.9	217.827
Acetylcholine; CE0; OIPILFWXSMYKGL-UHFFFAOYSA-N	20.718	146.116	146.118	C7H16NO2	Acyl cholines	OIPILFWXSMYKGL-UHFFFAOYSA-N	CC(=O)OCC[N+](C)(C)C	12.661	99.9	195.429
Acetylloboridin	10.664	559.145	559.142	C25H28O13	Phenolic glycosides	NWASWCGVBSEDJX-HYOIWIKGSA-N	Cc1cc(=O)c2c(c(C)c(O[C@H]3[C@H](OC(=O)C)[C@@H](OC(=O)C)[C@H](OC(=O)C)[C@@H](COC(=O)C)O3)cc2O)o1	5.52632	99.8	44.2466
ADENINE	12.0274	174.019	174.018	C5H5N5	6-aminopurines	GFFGJBXGBJISGV-UHFFFAOYSA-N	N=1C=NC2=C(N=CNC12)N	9.53926	99.9	25.1861
Alanine conjugated chenodeoxycholic acid	12.6306	446.325	446.326	C27H45NO5	Glycinated bile acids and derivatives	HHGKPVQSNIVPPF-STVJXAOYSA-N	C[C@H](CCC(N[C@@H](C)C(O)=O)=O)[C@H]1CC[C@@]2([H])[C@]3([H])[C@H](O)C[C@]4([H])C[C@H](O)CC[C@]4(C)[C@H]3CC[C@@]21C	3.31596	100	75.5294
Alanylleucine (isomer of 675); PlaSMA ID-674	20.2003	203.14	203.14	C9H18N2O3	Dipeptides	RDIKFPRVLJLMER-UHFFFAOYNA-N	O=C(O)C(NC(=O)C(N)C)CC(C)C	1.03377	100	37.4388
Allopregnanolone	8.1795	341.242	341.245	C21H34O2	Gluco/mineralocorticoids, progestogins and derivatives	AURFZBICLPNKBZ-JMTGGFPBSA-N	O=C(C)C1CCC2C3CCC4CC(O)CCC4(C)C3CCC12C	9.64116	99.8	23.5013
Alpha-pyrrolidinovalerophenone	19.4838	232.167	232.17	C15H21NO	Alkyl-phenylketones	YDIIDRWHPFMLGR-UHFFFAOYSA-N	CCCC(C(=O)C1=CC=CC=C1)N2CCCC2	12.0171	99.8	50.8675
Ampiroxicam	16.614	470.104	470.099	C20H21N3O7S	Benzothiazines	LSNWBKACGXCGAJ-UHFFFAOYSA-N	C1(C2=C(S(N(C=1C(NC3C=CC=CN=3)=O)C)(=O)=O)C=CC=C2)OC(OC(OCC)=O)C	9.27464	99.6	30.4325
Anagrelide	19.8057	256.001	256.004	C10H7Cl2N3O	Quinazolines	OTBXOEAOVRKTNQ-UHFFFAOYSA-N	ClC=1C=CC=2N=C3N=C(O)CN3CC2C1Cl	9.80454	99.9	83.1643
andrographolide	18.6329	351.221	351.22	C20H30O5	Gamma butyrolactones	BOJKULTULYSRAS-JVOLFZNRSA-N	O=C1OCC(O)C1=CCC2C(=C)CCC3C(C)(CO)C(O)CCC23C	2.27777	100	32.8588
Aniline	16.1656	94.0651	94.0651	C6H7N	Aniline and substituted anilines	PAYRUJLWNCNPSJ-UHFFFAOYSA-N	NC1=CC=CC=C1	0	100	3136.51
ANILINE-2-SULFONATE	12.0282	196.004	196.004	C6H7NO3S	Benzenesulfonic acids and derivatives	ZMCHBSMFKQYNKA-UHFFFAOYSA-N	C1=CC=C(C(=C1)N)S(=O)(=O)O	1.07141	100	21.4344
Aspergillusenes A	18.5175	235.167	235.169	C15H22O2	Sesquiterpenoids	NWPUHDAIOGMKFI-WUXMJOGZSA-N	OC1=C(/C(C)=C/CCC(C)C)C=CC(CO)=C1	10.418	99.9	261.412
Aspicilin	4.39875	346.259	346.259	C18H32O5	Macrolides and analogues	KECCBFYFEOTIBV-KHDHUXSVSA-N	C[C@@H]1OC(=O)/C=C/[C@H]([C@H]([C@@H](CCCCCCCCCC1)O)O)O	0.895284	100	20.0703
b-Ala-Lys	19.5742	218.147	218.15	C9H19N3O3	Hybrid peptides	PLDCWKCPEXNWJH-ZETCQYMHSA-N	NCCCC[C@@H](C(O)=O)NC(=O)CCN	14.3021	99.8	366.503
Bensulide	16.7344	398.064	398.068	C14H24NO4PS3	Benzenesulfonamides	RRNIZKPFKNDSRS-UHFFFAOYSA-N	CC(C)OP(=S)(OC(C)C)SCCNS(=O)(=O)C1=CC=CC=C1	8.74223	99.8	22.6888
Benzyldiethylamine	14.9044	164.146	164.143	C11H17N	Phenylmethylamines	ZWRDBWDXRLPESY-UHFFFAOYSA-N	CCN(CC)Cc1ccccc1	16.6318	99.9	89.774
bergenin	11.6801	329.082	329.08	C14H16O9	Gallic acid and derivatives	YWJXCIXBAKGUKZ-HJJNZUOJSA-N	O=C1OC2C(O)C(O)C(OC2C3=C(O)C(OC)=C(O)C=C13)CO	5.50018	99.9	327.337
Bestatin	18.902	309.176	309.181	C16H24N2O4	Hybrid peptides	VGGGPCQERPFHOB-RDBSUJKOSA-N	O=C(O)C(N=C(O)C(O)C(N)CC=1C=CC=CC1)CC(C)C	14.8133	99.6	48.3442
BETAINE	18.5399	140.066	140.068	C5H11NO2	Alpha amino acids	KWIUHFFTVRNATP-UHFFFAOYSA-N	C[N+](C)(C)CC(=O)[O-]	17.2059	99.9	127.001
Bisoprolol	4.38105	326.233	326.233	C18H31NO4	Benzylethers	VHYCDWMUTMEGQY-UHFFFAOYSA-N	CC(C)NCC(O)COc1ccc(COCCOC(C)C)cc1	2.23767	100	28.9927
Bromhexine	19.8057	375.01	375.007	C14H20Br2N2	Phenylmethylamines	OJGDCBLYJGHCIH-UHFFFAOYSA-N	CN(Cc1cc(cc(c1N)Br)Br)C2CCCCC2	7.75986	99.8	22.2176
Butenolide	7.60487	142.05	142.05	C6H7NO3	Butenolides	HUSDLVGPEKVWAL-UHFFFAOYSA-N	O=C1OC(N=C(O)C)C=C1	3.02711	100	29.9967
Calycanthine	17.4782	369.199	369.2	C22H26N4	Aminoquinolines and derivatives	XSYCDVWYEVUDKQ-LIKPIUCQSA-N	C=1C=CC2=C(C1)NC3N(C)CCC24C5NC=6C=CC=CC6C34CCN5C	4.08992	100	34.3241
Capsaicin	18.8287	328.181	328.18	C18H27NO3	Methoxyphenols	YKPUWZUDDOIDPM-SOFGYWHQSA-N	O=C(NCC1=CC=C(O)C(OC)=C1)CCCCC=CC(C)C	3.687	100	116.096
Carboline base + 4H, carboxylic acid; PlaSMA ID-805	8.7214	217.101	217.101	C12H12N2O2	Carbolines	FSNCEEGOMTYXKY-UHFFFAOYNA-N	O=C(O)C3NCC=2NC1=CC=CC=C1C=2C3	3.27037	100	21.1778
Caryophyllene [T(-)]	17.7229	191.176	191.179	C14H22	Branched unsaturated hydrocarbons	INOSMXBKABLUIL-CHWSQXEVSA-N	C=C1CC=C(C)CCC2C1CC2(C)C	16.3721	99.8	389.852
Castanospermine	16.9728	190.107	190.107	C8H15NO4	Indolizidines	JDVVGAQPNNXQDW-TVNFTVLESA-N	O[C@@H](C1)[C@@H](O)[C@H](O)[C@@H]([C@@H](O)2)N(CC2)1	3.62953	100	42.9918
caudatin	18.5399	491.303	491.3	C28H42O7	Gluco/mineralocorticoids, progestogins and derivatives	VWLXIXALPNYWFH-UVJZLUDHSA-N	O=C(OC1CC2C(O)(CC=C3CC(O)CCC32C)C4(O)CCC(O)(C(=O)C)C14C)C=C(C)C(C)C	7.14431	99.7	32.3421
CE-108E aglycone	18.0292	508.267	508.269	C30H37NO6	Macrolides and analogues	LARXQQSQVITAGF-IIXFXMGHSA-N	CC(OC(C(C)/C=C/1)=O)C/C=C/C=C/C=C/C=C/C=C\C2OC(C=CC2C(N)=O)(O)/C=C/CCCC1=O	4.8793	99.9	27.8168
Cearoin	15.9187	283.037	283.037	C14H12O4	Benzophenones	NFJVELXCUBWAFL-UHFFFAOYSA-N	O=C(C=1C=CC=CC1)C=2C=C(O)C(OC)=CC2O	0.0353311	100	22.668
Cephalexin - Dark Web Drugs	14.3985	348.103	348.101	C16H17N3O4S	Cephalosporins	ZAIPMKNFIOOWCQ-UEKVPHQBSA-N	CC1=C(N2C(C(C2=O)NC(=O)C(C3=CC=CC=C3)N)SC1)C(=O)O	4.424	99.9	20.5974
Choline; CE0; OEYIOHPDSNJKLS-UHFFFAOYSA-N	20.9602	104.107	104.107	C5H14NO	Cholines	OEYIOHPDSNJKLS-UHFFFAOYSA-N	C[N+](C)(C)CCO	1.05661	100	83.2613
Chrysanthemic Acid_major	17.7229	191.104	191.104	C10H16O2	Monocyclic monoterpenoids	XLOPRKKSAJMMEW-UHFFFAOYSA-N	CC(C)=CC1C(C(=O)O)C1(C)C	0.261637	100	1634.8
Cinnamamide	7.42787	148.074	148.076	C9H9NO	Cinnamic acid amides	APEJMQOBVMLION-VOTSOKGWSA-N	NC(=O)\C=C\C1=CC=CC=C1	13.3715	99.9	166.792
Clopyralid	8.15698	191.959	191.961	C6H3Cl2NO2	Pyridinecarboxylic acids	HUBANNPOLNYSAD-UHFFFAOYSA-N	OC(=O)c1nc(Cl)ccc1Cl	10.7313	99.9	59.7404
Coumarin base + 1O, 1MeO, O-Hex; PlaSMA ID-578	17.9615	193.049	193.049	C10H8O4	Coumarin and derivatives	SGTCGCCQZOUMJJ-UHFFFAOYNA-N	O=C2OC3=CC(OC1OC(CO)C(O)C(O)C1(O))=C(OC)C=C3(C=C2)	1.036	100	30.3873
CREATINE	18.0541	132.076	132.077	C4H9N3O2	Alpha amino acids and derivatives	CVSVTCORWBXHQV-UHFFFAOYSA-N	CN(CC(=O)O)C(=N)N	7.94992	100	68.8889
CYCLOPENTANONE	20.5227	102.09	102.091	C5H8O	Cyclic ketones	BGTOWKSIORTVQH-UHFFFAOYSA-N	C1CCC(=O)C1	17.0436	99.9	144.664
Cyclo-prolylglycine; PlaSMA ID-262	20.8945	155.08	155.082	C7H10N2O2	Amino acids	OWOHLURDBZHNGG-UHFFFAOYNA-N	O=C1CNC(=O)C2CCCN12	10.962	99.9	2172.99
CYCLOSERINE	13.5136	103.052	103.05	C3H6N2O2	Alpha amino acids and derivatives	DYDCUQKUCUHJBH-UWTATZPHSA-N	OC1=NOCC1N	17.4672	99.9	52.6995
Cytosine; CE0; OPTASPLRGRRNAP-UHFFFAOYSA-N	10.7348	112.051	112.051	C4H5N3O	Pyrimidones	OPTASPLRGRRNAP-UHFFFAOYSA-N	c1cnc([nH]c1=N)O	3.21284	100	183.973
D-(+)-GALACTOSAMINE	9.41295	180.088	180.087	C6H13NO5	Hexoses	MSWZFWKMSRAUBD-GASJEMHNSA-N	C([C@@H]1[C@@H]([C@@H]([C@H](C(O1)O)N)O)O)O	8.60697	100	21.09
Deferasirox (Exjade)	22.3147	374.114	374.114	C21H15N3O4	Phenyl-1,2,4-triazoles	BOFQWVMAQOTZIW-UHFFFAOYSA-N	C1=CC(=CC=C1C(O)=O)N2C(=NC(=N2)C3=CC=CC=C3O)C4=CC=CC=C4O	1.5236	100	145.941
Dehydrophytosphingosine (not validated) - 2H	4.2565	314.267	314.269	C18H35NO3	1,3-aminoalcohols	WWXZQFWOWANITM-AQASXUMVSA-N	CCCCCCCCC\C=C\C=C\CC(O)C(O)C(N)CO	6.61853	99.9	52.305
Dehydrophytosphingosine (not validated, isomer of 1679); PlaSMA ID-1677	4.39958	316.284	316.285	C18H37NO3	Lipids	CQKNELOTFUSOTP-UHFFFAOYNA-N	OCC(N)C(O)C(O)CCCC=CCCCCCCCCC	2.56098	100	22.2332
Denatonium	4.37948	326.234	326.235	[C21H29N2O]+	Alpha amino acid amides	ZFQMTVNLDNXRNQ-UHFFFAOYSA-O	CC[N+](CC)(CC(=O)NC1=C(C)C=CC=C1C)CC1=CC=CC=C1	3.86224	100	27.8673
DEOXYCORTICOSTERONE ACETATE	9.63443	395.212	395.219	C23H32O4	Gluco/mineralocorticoids, progestogins and derivatives	VPGRYOFKCNULNK-UHFFFAOYSA-N	CC(=O)OCC(=O)C1CCC2C1(CCC3C2CCC4=CC(=O)CCC34C)C	17.6358	99	27.6149
DEOXYGUANOSINE	11.9824	290.081	290.086	C10H13N5O4	Purine 2'-deoxyribonucleosides	YKBGVTZYEHREMT-KVQBGUIXSA-N	NC1=NC2=C(N=CN2[C@H]2C[C@H](O)[C@@H](CO)O2)C(=O)N1	16.7881	99.5	57.4123
Dicyclohexylamine	13.2778	182.187	182.19	C12H23N	Cyclohexylamines	XBPCUCUWBYBCDP-UHFFFAOYSA-N	C1CCC(CC1)NC1CCCCC1	16.0272	99.8	41.721
Dihydoroferuloyl Octylamine; PlaSMA ID-1639	4.12	310.234	310.236	C18H31NO3	Ferulic acid and derivatives	HNHHAOUUFVYDEW-UHFFFAOYNA-N	CCCCCCCCNC(O)CCC1=CC(OC)=C(O)C=C1	7.73604	99.9	63.5202
Dihydrocapsaicin	4.04368	308.218	308.22	C18H29NO3	Methoxyphenols	XJQPQKLURWNAAH-UHFFFAOYSA-N	O=C(NCC1=CC=C(O)C(OC)=C1)CCCCCCC(C)C	6.16443	99.9	79.129
Dihydrochalcone	10.9557	211.114	211.112	C15H14O	Retro-dihydrochalcones	QGGZBXOADPVUPN-UHFFFAOYSA-N	C1=CC=C(C=C1)CCC(=O)C2=CC=CC=C2	9.28418	99.9	81.192
Dihydrogedunic Acid, Methyl Ester	10.7138	515.206	515.204	C26H36O8	Naphthopyrans	CDTMPWYDQKWYFT-IASWOTTCSA-N	O=C(OC1CC2C(C(=O)CCC2(C)C3CCC4(C)C(OC(=O)C5OC54C13C)C(=O)OC)(C)C)C	3.3773	99.9	115.178
Dihydroxy (3Alpha,12Alpha)Pregnan-20-One_major	9.0534	357.236	357.24	C21H34O3	Gluco/mineralocorticoids, progestogins and derivatives	QIVOTMOKECOCJC-OKUZHXNBSA-N	CC(=O)C1CCC2C3CCC4CC(O)CCC4(C)C3CC(O)C12C	12.0927	99.6	25.7562
DIMBOA + O-Hex	22.3075	374.107	374.108	C15H19NO10	O-glycosyl compounds	WTGXAWKVZMQEDA-UHFFFAOYSA-N	O=C2N(O)C=3C=CC(OC)=CC=3(OC2(OC1OC(CO)C(O)C(O)C1(O)))	2.08496	100	76.3615
Dimethylglycine; CE0; FFDGPVCHZBVARC-UHFFFAOYSA-N	18.3199	104.072	104.071	C4H9NO2	Alpha amino acids	FFDGPVCHZBVARC-UHFFFAOYSA-N	CN(C)CC(=O)O	10.4737	100	21.831
Di-n-butyl phosphate	3.43728	211.109	211.109	C8H19O4P	Dialkyl phosphates	JYFHYPJRHGVZDY-UHFFFAOYSA-N	CCCCOP(O)(=O)OCCCC	3.69477	100	30.5724
DL-Coniine	3.76317	128.141	128.143	C8H17N	Alkaloids and derivatives	NDNUANOUGZGEPO-UHFFFAOYSA-N	CCCC1CCCCN1	16.9342	99.9	20.5541
Docosahexaenoyl Ethanolamide	18.8468	372.289	372.29	C24H37NO2	N-acylethanolamines	GEEHOLRSGZPBSM-KUBAVDMBSA-N	CC/C=C\C/C=C\C/C=C\C/C=C\C/C=C\C/C=C\CCC(=O)NCCO	2.68608	100	21.2067
Dodecylamine	12.5778	186.223	186.222	C12H27N	Monoalkylamines	JRBPAEWTRLWTQC-UHFFFAOYSA-N	CCCCCCCCCCCCN	8.43081	100	27.5621
Dodemorph	3.63178	282.277	282.279	C18H35NO	Morpholines	JMXKCYUTURMERF-UHFFFAOYSA-N	CC1CN(CC(C)O1)C1CCCCCCCCCCC1	6.87263	99.9	326.115
Drofenine	3.87475	318.239	318.243	C20H31NO2	Benzene and substituted derivatives	AGJBLWCLQCKRJP-UHFFFAOYSA-N	[H]c(c([H])2)c([H])c([H])c(c([H])2)C([H])(C(=O)OC([H])([H])C([H])([H])N(C([H])([H])C([H])([H])[H])C([H])([H])C([H])([H])[H])C([H])(C([H])([H])1)C([H])([H])C([H])([H])C([H])([H])C([H])([H])1	11.5321	99.7	42.5691
D-Xylulose	9.84525	151.061	151.06	C5H10O5	Pentoses	LQXVFWRQNMEDEE-OVEKKEMJSA-N	C1C(C(C(O1)(CO)O)O)O	8.60585	100	23.4687
Dysidin	15.7969	398.071	398.069	C16H22Cl3NO4	N-substituted carboxylic acid imides	PXUALOWHEHOKSO-SOXOQJGTSA-N	O=C(C=C(OC)CC(C)C(Cl)(Cl)Cl)N1C(=O)C=C(OC)C1C(C)C	6.20496	99.9	68.4728
Ectoine	18.826	143.079	143.082	C6H10N2O2	Alpha amino acids and derivatives	WQXNXVUDBPYKBA-YFKPBYRVSA-N	CC1=NCCC(N1)C(=O)O	18.1715	99.9	45.3648
Eicosanoids_11-HEPE_C20H30O3	3.77022	336.248	336.253	C20H30O3	Hydroxyeicosapentaenoic acids	IDEHSDHMEMMYIR-WSAGHCNZSA-N	CC\C(=C(/C\C(=C(/C(=C(/C(C\C(=C(/C\C(=C(/CCCC(=O)O)\[H])\[H])\[H])\[H])O)\[H])/[H])\[H])\[H])\[H])\[H]	17.0407	99.3	28.2597
Epoxiconazole	11.6605	330.084	330.08	C17H13ClFN3O	Stilbenes	ZMYFCFLJBGAQRS-UHFFFAOYSA-N	FC1=CC=C(C=C1)C1(CN2C=NC=N2)OC1C1=CC=CC=C1Cl	12.4818	99.7	27.7522
ethyl 2-((4-methyl-2-oxo-2H-chromen-7-yl)oxy)propanoate	18.5257	277.113	277.11	C15H16O5	Coumarins and derivatives	YXBHWZYFNLJVNP-UHFFFAOYSA-N	O=C1OC=2C=C(OC(C(=O)OCC)C)C=CC2C(=C1)C	9.05778	99.9	26.2088
Eupatorin	14.0995	367.079	367.079	C18H16O7	7-O-methylated flavonoids	KLAOKWJLUQKWIF-UHFFFAOYSA-N	O=C1C=C(OC=2C=C(OC)C(OC)=C(O)C12)C=3C=CC(OC)=C(O)C3	0.0272421	100	82.2897
Fensulfothion	14.0838	309.036	309.038	C11H17O4PS2	Phenyl thiophosphates	XDNBJTQLKCIJBV-UHFFFAOYSA-N	CCOP(=S)(OCC)OC1=CC=C(C=C1)S(C)=O	6.37462	99.9	22.6491
Ferulic acid	22.4687	195.072	195.07	C10H10O4	Hydroxycinnamic acids	KSEBMYQBYZTDHS-HWKANZROSA-N	O=C(O)C=CC1=CC=C(O)C(OC)=C1	10.7141	99.9	21.1765
FIPRONIL	13.9497	436.942	436.946	C12H4Cl2F6N4OS	Phenylpyrazoles	ZOCSXAVNDGMNBV-UHFFFAOYSA-N	Clc1cc(C(F)(F)F)cc(Cl)c1N2C(N)=C(S(=O)C(F)(F)F)C(C#N)=N2	9.10868	99.7	25.2544
Flavone base + 3O, 2MeO, O-guaiacylglycerol	17.1188	527.154	527.155	C27H26O11	3'-O-methylated flavonoids	WXNJNHFYIWEHIL-UHFFFAOYSA-N	O=C1C=C(OC2=CC(O)=CC(O)=C12)C=4C=C(OC)C(OC(CO)C(O)C=3C=CC(O)=C(OC)C=3)=C(OC)C=4	2.0677	100	26.2905
Flumetsulam	21.8564	326.051	326.052	C12H9F2N5O2S	1,2,4-triazolopyrimidine-2-sulfonanilides	RXCPQSJAVKGONC-UHFFFAOYSA-N	CC(C=3)=Nc(n1)n(C3)nc1S(=O)(=O)Nc(c(F)2)c(F)ccc2	1.50283	100	30.3969
Flunixine	16.1656	297.081	297.085	C14H11F3N2O2	Trifluoromethylbenzenes	NOOCSNJCXJYGPE-UHFFFAOYSA-N	CC1=C(C=CC=C1NC2=C(C=CC=N2)C(=O)O)C(F)(F)F	12.892	99.7	41.5068
Flutriafol	16.4125	302.113	302.11	C16H13F2N3O	Diphenylmethanes	JWUCHKBSVLQQCO-UHFFFAOYSA-N	OC(CN1C=NC=N1)(C1=CC=C(F)C=C1)C1=C(F)C=CC=C1	11.0887	99.8	24.6675
Gabapentin (Neurontin)	3.76033	172.132	172.133	C9H17NO2	Gamma amino acids and derivatives	UGJMXCAKCUNAIE-UHFFFAOYSA-N	C1CCCC(C1)(CC(O)=O)CN	7.61039	100	25.4205
geraniol	18.3199	177.122	177.12	C10H18O	Acyclic monoterpenoids	GLZPCOQZEFWAFX-JXMROGBWSA-N	OCC=C(C)CCC=C(C)C	9.03342	99.9	32.7602
Glutamine (D)	17.8552	169.056	169.058	C5H10N2O3	Alpha amino acids	ZDXPYRJPNDTMRX-GSVOUGTGSA-N	O=C(O)C(N)CCC(=N)O	15.7342	99.9	22.9677
Glyceryl linolenate	13.0734	370.295	370.295	C21H36O4	Lineolic acids and derivatives	GGJRAQULURVTAJ-PDBXOOCHSA-N	O=C(OCC(O)CO)CCCCCCCC=CCC=CCC=CCC	0.270055	100	22.5416
Glycine	17.9799	76.0379	76.0393	C2H5NO2	Alpha amino acids	DHMQDGOQFOQNFH-UHFFFAOYSA-N	C(C(=O)O)N	18.6746	100	20.2496
Gly-Tyr-Ala	18.1347	310.136	310.14	C14H19N3O5	Oligopeptides	UIQGJYUEQDOODF-KWQFWETISA-N	O=C(O)C(N=C(O)C(N=C(O)CN)CC1=CC=C(O)C=C1)C	12.0591	99.7	37.0463
Goniothalenol	9.0341	250.105	250.107	C13H12O4	Furopyrans	ZKIRVBNLJKGIEM-UHFFFAOYSA-N	O=C1OC2C(OC(C=3C=CC=CC3)C2O)C=C1	8.35641	99.9	28.658
GUANIDINOSUCCINATE	7.22278	158.053	158.056	C5H9N3O4	Aspartic acid and derivatives	VVHOUVWJCQOYGG-REOHCLBHSA-N	NC(=N)N[C@@H](CC(O)=O)C(O)=O	19.7398	99.8	23.0264
Guanine	18.1347	303.104	303.106	C5H5N5O	Purines and purine derivatives	UYTPUPDQBNUYGX-UHFFFAOYSA-N	C1=NC2=C(N1)C(=O)N=C(N2)N	5.64159	99.9	20.9331
Gyromitrin	16.6582	123.053	123.053	C4H8N2O	N-alkylated hydrazones	IMAGWKUTFZRWSB-HWKANZROSA-N	O=CN(N=CC)C	2.51924	100	20.4258
h_14_19_norandrosterone	3.88813	259.207	259.206	C18H28O2	Estrogens and derivatives	UOUIARGWRPHDBX-CQZDKXCPSA-N	O[C@@H]1CC[C@@]2([H])[C@](CC[C@]3([H])[C@]2([H])CC[C@@]4(C)[C@@]3([H])CCC4=O)([H])C1	6.44276	99.9	20.5412
h_166_andarine_s4	10.7271	442.12	442.122	C19H18F3N3O6	Acetanilides	YVXVTLGIDOACBJ-SFHVURJKSA-N	FC(F)(F)C1=C([N+]([O-])=O)C=CC(NC([C@](O)(C)COC2=CC=C(NC(C)=O)C=C2)=O)=C1	4.38793	99.9	41.1737
h_48_dehydrochlormethyltestosterone	18.1578	317.168	317.167	C20H27ClO2	Androgens and derivatives	AGUNEISBPXQOPA-XMUHMHRVSA-N	O=C1C=C[C@@]2(C)C(CC[C@@H]3[C@@H]2CC[C@@]4(C)[C@H]3CC[C@]4(C)O)=C1Cl	3.90962	100	39.3636
Hexosyl LPE 16:0	18.2272	616.337	616.346	C27H54NO12P	Monosaccharide phosphates	UISOORRILGPHLE-OEYVFKEPSA-N	[H][C@@](O)(COC(=O)CCCCCCCCCCCCCCC)COP(O)(=O)OCCNC1OC(CO)C(O)C(O)C1O	14.3426	98.4	30.1936
hexylphenazolone	18.5304	258.151	258.149	C16H19NO2	Alpha amino acids and derivatives	WNHWMFLENIGCEV-OWBHPGMISA-N	O=C1/C(N=C(CCCCCC)O1)=C/C2=CC=CC=C2	9.83928	99.9	36.5037
hirsutanone	14.0838	367.092	367.094	C19H20O5	Linear diarylheptanoids	VWHYFMQKJYFLCC-DUXPYHPUSA-N	O=C(C=CCCC1=CC=C(O)C(O)=C1)CCC2=CC=C(O)C(O)=C2	5.28475	99.9	62.3961
Hydrocotarnine; PlaSMA ID-839	9.89765	222.11	222.112	C12H15NO3	Others	XXANNZJIZQTCBP-UHFFFAOYSA-N	COC1=C2CN(C)CCC2=CC2=C1OCO2	10.22	99.9	25.5402
Hypoxanthine; CE0; FDGQSTZJBFJUBT-UHFFFAOYSA-N	9.17905	137.044	137.046	C5H4N4O	Hypoxanthines	FDGQSTZJBFJUBT-UHFFFAOYSA-N	c1nc2c([nH]1)ncnc2O	12.3316	99.9	137.584
Imidacloprid urea	7.16968	212.059	212.059	C9H10ClN3O	2-halopyridines	ADWTYURAFSWNSU-UHFFFAOYSA-N	c1cc(ncc1CN2CCN=C2O)Cl	0.377254	100	46.5439
INDOLE-3-ACETALDEHYDE	16.3852	160.073	160.076	C10H9NO	3-alkylindoles	WHOOUMGHGSPMGR-UHFFFAOYSA-N	C1=CC=C2C(=C1)C(=CN2)CC=O	19.2409	99.8	33.49
INDOLE-3-ETHANOL	21.1215	184.072	184.073	C10H11NO	3-alkylindoles	MBBOMCVGYCRMEA-UHFFFAOYSA-N	OCCC1=CNC2=CC=CC=C12	4.29177	100	115.475
INDOLE-3-METHYL ACETATE	12.6562	212.069	212.068	C11H11NO2	Indole-3-acetic acid derivatives	KTHADMDGDNYQRX-UHFFFAOYSA-N	COC(=O)CC1=CNC2=C1C=CC=C2	2.31058	100	31.571
Indoline	13.4962	120.081	120.081	C8H9N	Indolines	LPAGFVYQRIESJQ-UHFFFAOYSA-N	C1CC2=CC=CC=C2N1	1.91538	100	178.363
Isobutyric acid	9.86518	89.0596	89.0597	C4H8O2	Carboxylic acids	KQNPFQTWMSNSAP-UHFFFAOYSA-N	O=C(O)C(C)C	1.34741	100	20.9861
Isoguvacine	17.6981	128.07	128.071	C6H9NO2	Hydropyridines	KRVDMABBKYMBHG-UHFFFAOYSA-N	OC(=O)C(C1)=CCNC1	1.56164	100	39.4723
Isoleucine	14.5275	132.1	132.102	C6H13NO2	Isoleucine and derivatives	AGPKZVBTJJNPAG-WHFBIAKZSA-N	CC[C@H](C)[C@@H](C(=O)O)N	16.6538	99.9	21.1436
Isoleucylglutamate; PlaSMA ID-1146	16.8533	261.14	261.144	C11H20N2O5	Dipeptides	KTGFOCFYOZQVRJ-UHFFFAOYNA-N	O=C(O)CCC(NC(=O)C(N)C(C)CC)C(=O)O	14.896	99.7	22.0006
Isoquercitrin	17.9023	483.056	483.05	C21H20O12	Flavonoid-3-O-glycosides	OVSQVDMCBVZWGM-QSOFNFLRSA-N	O=C1C(OC2OC(CO)C(O)C(O)C2O)=C(OC=3C=C(O)C=C(O)C13)C=4C=CC(O)=C(O)C4	12.8558	99.2	36.2874
Ketamine	9.8647	238.101	238.099	C13H16ClNO	Chlorobenzenes	YQEZLKZALYSWHR-UHFFFAOYSA-N	CNC1(CCCCC1=O)C2=CC=CC=C2Cl	5.7959	100	30.2085
korseveriline	14.5825	454.328	454.33	C27H45NO3	Cerveratrum-type alkaloids	NQGYOUYEGZOZBN-CADHWWJYSA-N	OC1CCC2(C)C(C1)C(O)CC3C2CC4C5CN6CC(C)CCC6C(C)C5CCC43O	3.71976	99.9	22.758
L-(-)-Malic acid	10.0765	135.026	135.029	C4H6O5	Beta hydroxy acids and derivatives	BJEPYKJPYRNKOW-REOHCLBHSA-N	C(C(C(=O)O)O)C(=O)O	17.6999	99.9	21.5657
Lagochilin_major	14.7063	374.29	374.29	C20H36O5	Diterpenoids	XYPPDQHBNJURHU-RHFXQVJCSA-N	CC1CCC2C(C)(CO)C(O)CCC2(C)C12CCC(CO)(CCO)O2	0	100	21.8171
L-ALANINE	17.5312	90.0557	90.055	C3H7NO2	Alanine and derivatives	QNAYBMKLOCPYGJ-REOHCLBHSA-N	C[C@@H](C(=O)O)N	8.21721	100	22.7183
Lamivudine	19.6816	230.06	230.059	C8H11N3O3S	3'-thia pyrimidine nucleosides	JTEGQNOMFQHVDC-NKWVEPMBSA-N	N=C1N=C(O)N(C=C1)C2OC(SC2)CO	1.34748	100	20.1336
L-Arginine; CE0; ODKSFYDXXFIFQN-BYPYZUCNSA-N	19.6652	175.116	175.119	C6H14N4O2	L-alpha-amino acids	ODKSFYDXXFIFQN-BYPYZUCNSA-N	C(C[C@@H](C(=O)O)N)CNC(=N)N	15.0755	99.9	92.6373
L-Carnitine; CE0; PHIQHXFUZVPYII-ZCFIWIBFSA-N	18.2296	162.11	162.112	C7H15NO3	Carnitines	PHIQHXFUZVPYII-ZCFIWIBFSA-N	C[N+](C)(C)C[C@@H](CC(=O)[O-])O	17.7038	99.8	195.916
Lenalidomide	20.0702	260.103	260.103	C13H13N3O3	Isoindolones	GOTYRUGSSMKFNF-UHFFFAOYSA-N	C1=CC(=C2C(=C1)C(N(C2)C3C(NC(CC3)=O)=O)=O)N	0.115339	100	23.2512
Leucine; PlaSMA ID-100	15.3757	132.102	132.102	C6H13NO2	Amino acids	ROHFNLRQFUQHCH-UHFFFAOYNA-N	O=C(O)C(N)CC(C)C	2.95226	100	33.1227
Leucylglycine; PlaSMA ID-548	19.6303	189.121	189.123	C8H16N2O3	Dipeptides	LESXFEZIFXFIQR-UHFFFAOYNA-N	O=C(O)CNC(=O)C(N)CC(C)C	6.87385	100	77.4987
LEVODOPA	15.6236	236.031	236.032	C9H11NO4	Tyrosine and derivatives	WTDRDQBEARUVNC-LURJTMIESA-N	O=C(O)C(N)CC1=CC=C(O)C(O)=C1	4.87222	100	33.5853
L-Glutamic acid; CE0; WHUUTDBJXJRKMK-VKHMYHEASA-N	16.298	148.058	148.06	C5H9NO4	Glutamic acid and derivatives	WHUUTDBJXJRKMK-VKHMYHEASA-N	C(CC(=O)O)[C@@H](C(=O)O)N	17.1552	99.9	40.6623
L-GLUTAMINE	17.86	147.075	147.076	C5H10N2O3	Alpha amino acids	ZDXPYRJPNDTMRX-VKHMYHEASA-N	C(CC(=O)N)[C@@H](C(=O)O)N	11.6946	99.9	22.9085
L-HISTIDINE	21.843	156.075	156.077	C6H9N3O2	Histidine and derivatives	HNDVDQJCIGZPNO-YFKPBYRVSA-N	C1=C(NC=N1)C[C@@H](C(=O)O)N	9.2903	100	24.3547
Lichesterinic acid	13.3988	342.262	342.264	C19H32O4	Butenolides	SLQVVNFTCYVCPB-INIZCTEOSA-N	CCCCCCCCCCCCC[C@H]1C(=C(C(=O)O1)C)C(=O)O	5.52205	99.9	22.4772
L-Kynurenine; CE0; YGPSJZOEDVAXAB-QMMMGPOBSA-N	19.6617	209.089	209.092	C10H12N2O3	Alkyl-phenylketones	YGPSJZOEDVAXAB-QMMMGPOBSA-N	c1ccc(c(c1)C(=O)C[C@@H](C(=O)O)N)N	14.6825	99.8	41.1089
LL-2,6-DIAMINOHEPTANEDIOATE	19.7178	191.1	191.103	C7H14N2O4	Alpha amino acids	GMKMEZVLHJARHF-WHFBIAKZSA-N	C(C[C@@H](C(=O)O)N)C[C@@H](C(=O)O)N	16.3786	99.8	30.9338
Lotusine	21.0925	337.16	337.16	C19H24NO3+	Benzylisoquinolines	ZKTMLINFIQCERN-QGZVFWFLSA-O	OC1=CC=C(C=C1)CC2C3=CC(OC)=C(O)C=C3CC[N+]2(C)C	0.296595	100	26.3174
L-PROLINE	16.9239	116.069	116.071	C5H9NO2	Proline and derivatives	ONIBWKKTOPOVIA-BYPYZUCNSA-N	C1C[C@H](NC1)C(=O)O	17.2309	99.9	36.7258
L-Prolyl-L-isoleucine	19.5881	229.154	229.155	C11H20N2O3	Dipeptides	OCYROESYHWUPBP-CIUDSAMLSA-N	CC[C@H](C)[C@@H](C(=O)O)NC(=O)[C@@H]1CCCN1	1.57099	100	25.3474
L-Threonine; CE0; AYFVYJQAPQTCCC-GBXIJSLDSA-N	17.2185	120.066	120.066	C4H9NO3	L-alpha-amino acids	AYFVYJQAPQTCCC-GBXIJSLDSA-N	C[C@H]([C@@H](C(=O)O)N)O	2.33206	100	36.4283
Macamide B	12.2042	346.31	346.31	C23H39NO	N-acyl amines	MLGPKWUKOQAAGI-UHFFFAOYSA-N	O=C(NCC=1C=CC=CC1)CCCCCCCCCCCCCCC	0.577517	100	25.7235
Malic acid	10.0567	135.03	135.03	C4H6O5	Beta hydroxy acids and derivatives	BJEPYKJPYRNKOW-UHFFFAOYSA-N	O=C(O)CC(O)C(=O)O	2.9623	100	24.0327
Mecamylamine	14.9044	168.176	168.175	C11H21N	Bicyclic monoterpenoids	IMYZQPCYWPFTAG-UHFFFAOYSA-N	CNC(C)(C21)C(C)(C)C(CC2)C1	8.4436	100	111.58
Melibiose	15.6656	381.08	381.079	C12H22O11	O-glycosyl compounds	DLRVVLDZNNYCBX-ZZFZYMBESA-N	OCC1OC(OCC2OC(O)C(O)C(O)C2O)C(O)C(O)C1O	2.4142	100	24.6287
Memantine	7.53762	180.177	180.175	C12H21N	Monoalkylamines	BUGYDGFZZOZRHP-UHFFFAOYSA-N	CC12CC3CC(C)(C1)CC(N)(C3)C2	11.7664	99.9	74.284
MENTHOL(-)	13.1879	174.184	174.185	C10H20O	Menthane monoterpenoids	NOOLISFMXDJSKH-UHFFFAOYSA-N	OC1CC(C)CCC1C(C)C	5.39655	100	21.3668
Methionine propyl ester	17.7131	192.104	192.105	C8H17NO2S	Methionine and derivatives	QAAOQCWMSDMQMI-UHFFFAOYSA-N	CCCOC(=O)C(N)CCSC	4.52877	100	44.856
Methocarbamol (Robaxin)	14.8219	242.105	242.102	C11H15NO5	Anisoles	GNXFOGHNGIVQEH-UHFFFAOYSA-N	C1=CC=CC(=C1OC)OCC(O)COC(N)=O	12.4328	99.8	50.0389
methyl 10-acetyloxy-4,5,9-trihydroxy-1,4a-dimethyl-7-propan-2-yl-2,3,4,9,10,10a-hexahydrophenanthrene-1-carboxylate	9.63287	459.179	459.178	C23H32O7	Diterpenoids	WBEFPLHFVLPKHQ-UHFFFAOYSA-N	O=C(OC1C(O)C2=CC(=CC(O)=C2C3(C)C(O)CCC(C(=O)OC)(C)C13)C(C)C)C	1.63335	100	38.0921
methyl 1-oxo-4-(1H-pyrrol-2-yl)-2H-isoquinoline-3-carboxylate	10.6948	307.043	307.048	C15H12N2O3	Isoquinolones and derivatives	IADWMRZHOGHTMQ-UHFFFAOYSA-N	O=C(OC)C1=NC(O)=C2C=CC=CC2=C1C3=CC=CN3	17.0657	99.4	21.3835
methyl 2-(2-amino-4-hydroxy-6-methylpyrimidin-5-yl)acetate	20.511	220.07	220.07	C8H11N3O3	Pyrimidones	FMZPNXDUADVAFG-UHFFFAOYSA-N	O=C(OC)CC1=C(O)N=C(N=C1C)N	0.499841	100	23.8781
Metolachlor morpholinone	19.3803	234.145	234.149	C14H19NO2	Phenylmorpholines	DVBDYPDVNRJKNJ-UHFFFAOYSA-N	O=C2N(c1c(cccc1C)CC)C(C)COC2	15.1613	99.8	58.3318
Metosulam	21.1505	418.005	418.014	C14H13Cl2N5O4S	1,2,4-triazolopyrimidine-2-sulfonanilides	VGHPMIFEKOFHHQ-UHFFFAOYSA-N	Clc1c(ccc(Cl)c1NS(=O)(=O)c2nc3nc(OC)cc(OC)n3n2)C	19.8319	98.6	94.1459
Metronidazole	4.31647	172.073	172.072	C6H9N3O3	Nitroimidazoles	VAOCPAMSLUNLGC-UHFFFAOYSA-N	O=N(=O)C1=CN=C(N1CCO)C	5.40472	100	27.0523
Metsulfuron-methyl	15.0275	382.079	382.082	C14H15N5O6S	Benzoic acid esters	RSMUVYRMZCOLBH-UHFFFAOYSA-N	c1(c(cccc1)C(OC)=O)S(NC(Nc1nc(nc(n1)C)OC)=O)(=O)=O	6.20286	99.9	24.2267
Mevalonic Acid Lactone	18.161	148.096	148.097	C6H10O3	Delta valerolactones	JYVXNLLUYHCIIH-UHFFFAOYSA-N	O=C1OCCC(O)(C)C1	6.21215	100	1601.98
Miquelianin (=Q3G)	14.8038	501.061	501.06	C21H18O13	Flavonoid-3-O-glucuronides	DUBCCGAQYVUYEU-ZUGPOPFOSA-N	O=C(O)C1OC(OC=2C(=O)C=3C(O)=CC(O)=CC3OC2C=4C=CC(O)=C(O)C4)C(O)C(O)C1O	1.99577	100	39.8981
MLS001333083-01!THIO-TEPA52-24-4	21.1289	190.059	190.056	C6H12N3PS	Organic thiophosphoric acids and derivatives	FOCVUCIESVLUNU-UHFFFAOYSA-N	S=P(N1CC1)(N2CC2)N3CC3	13.5223	99.9	20.7791
MMV002816	20.5937	200.179	200.176	C10H21N3O	Piperazine carboxamides	RCKMWOKWVGPNJF-UHFFFAOYSA-N	CCN(CC)C(=O)N1CCN(C)CC1	18.7835	99.7	52.4026
MMV006741	9.04098	379.218	379.213	C22H26N4O2	N-benzylpiperidines	QGLMINHDDNFQAQ-UHFFFAOYSA-N	N=1C=NC(NC2CCN(CC=3C=CC=CC3)CC2)=C4C=C(OC)C(OC)=CC14	12.7633	99.5	32.8625
MMV026490	18.634	373.208	373.202	C23H24N4O	Bipyridines and oligopyridines	BRZAJTXRBIYUBT-UHFFFAOYSA-N	OC(=NCCC=1C=CC=CC1)C=2C=C(C=NC2NCC3CC3)C4=CN=CC=C4	14.2014	99.5	49.8776
MMV687243	8.1396	336.018	336.023	C15H14BrNO3	3-halobenzoic acids and derivatives	SSVQZTAKKRVHAK-UHFFFAOYSA-N	BrC1=CC=C(OCCOC=2C=CC=CC2)C(=C1)C(=N)O	13.9276	99.6	22.8121
MMV687703	2.30317	378.232	378.229	C22H27N5O	Benzimidazoles	VOVBYBYEYGCZIL-MRXNPFEDSA-N	N=1C(OC)=CC=CC1C2=NC=3C(=CC=CC3N4CCCC4)N2CC5NCCC5	8.32829	99.8	23.6513
MMV688762	18.8648	354.196	354.196	C24H23N3	2-phenylindoles	ARLOHHNBCXKXDE-XMMPIXPASA-N	N=1C=CC=CC1C(C=2C=3C=CC=CC3NC2C=4C=CC=CC4)N5CCCC5	2.17393	100	145.102
Morpholine	17.7229	88.0756	88.0757	C4H9NO	Morpholines	YNAVUWVOSKDBBP-UHFFFAOYSA-N	C1COCCN1	1.36246	100	25.0372
myricitrin	14.8219	503.057	503.059	C21H20O12	Flavonoid-3-O-glycosides	DCYOADKBABEMIQ-OWMUPTOHSA-N	O=C1C(OC2OC(C)C(O)C(O)C2O)=C(OC=3C=C(O)C=C(O)C13)C=4C=C(O)C(O)=C(O)C4	4.01544	99.9	21.848
N-(3-oxoheptanoyl)-L-homoserine lactone	7.87233	228.119	228.123	C11H17NO4	N-acyl-alpha amino acids and derivatives	WMGXONSYPOENKA-VIFPVBQESA-N	O=C(CC(N[C@@H]1C(OCC1)=O)=O)CCCC	16.7892	99.7	27.4319
N(PAI)-METHYL-L-HISTIDINE	19.9822	170.092	170.092	C7H11N3O2	Histidine and derivatives	JDHILDINMRGULE-LURJTMIESA-N	CN1C=NC=C1C[C@@H](C(=O)O)N	4.76212	100	43.7763
N,N-Acetylhistidine; CE0; KBOJOGQFRVVWBH-ZETCQYMHSA-N	20.5227	198.087	198.087	C8H11N3O3	Histidine and derivatives	KBOJOGQFRVVWBH-ZETCQYMHSA-N	CC(=N[C@@H](Cc1cnc[nH]1)C(=O)O)O	2.06979	100	49.9471
N,N-dimethyl-7H-purin-6-amine	17.5691	164.088	164.09	C7H9N5	6-alkylaminopurines	BVIAOQMSVZHOJM-UHFFFAOYSA-N	N1=CN=C(C=2NC=NC12)N(C)C	10.9696	99.9	27.526
N,N-Dimethyldecylamine oxide	11.7764	202.215	202.217	C12H27NO	Long-chain alkyl amine oxides	ZRKZFNZPJKEWPC-UHFFFAOYSA-N	CCCCCCCCCC[N+](C)(C)[O-]	7.12108	100	23.3026
N,N-Dimethyldipropylenetriamine	19.4204	160.178	160.181	C8H21N3	Trialkylamines	OMKZWUPRGQMQJC-UHFFFAOYSA-N	N(CCCN)CCCN(C)C	16.9808	99.9	42.8548
N,N-Dimethyldodecylamine N-oxide	12.5855	230.249	230.248	C14H31NO	Long-chain alkyl amine oxides	SYELZBGXAIXKHU-UHFFFAOYSA-N	CCCCCCCCCCCC[N+](C)(C)[O-]	5.42893	100	34.4749
N,N-Dimethylformamide	17.1914	74.0591	74.06	C3H7NO	Tertiary carboxylic acid amides	ZMXDDKWLCZADIW-UHFFFAOYSA-N	O=CN(C)C	12.2873	100	30.0754
N-[3-[5,17-bis[3-[acetyl(hydroxy)amino]propyl]-14-benzyl-8-(hydroxymethyl)-11-(2-methylpropyl)-3,6,9,12,15,18-hexaoxo-1,4,7,10,13,16-hexazacyclooctadec-2-yl]propyl]-N-hydroxyacetamide	3.13528	902.389	902.402	C39H61N9O13	Cyclic peptides	ZWTDABBYXDAIOL-UHFFFAOYSA-N	O=C(N(O)CCCC1N=C(O)C(N=C(O)C(N=C(O)C(N=C(O)C(N=C(O)C(N=C1O)CCCN(O)C(=O)C)CCCN(O)C(=O)C)CO)CC(C)C)CC=2C=CC=CC2)C	14.7828	96.5	26.6874
N8-Acetylspermidine	15.5342	188.177	188.176	C9H21N3O	Carboximidic acids	FONIWJIDLJEJTL-UHFFFAOYSA-N	C/C(=N/CCCCNCCCN)/O	4.5702	100	32.1161
N-Acetylalanine	16.1684	114.055	114.055	C5H9NO3	N-acyl-alpha amino acids	KTHDTJVBEPMMGL-UHFFFAOYSA-N	CC(C(=O)O)NC(=O)C	0.438385	100	39.0507
N-ACETYL-D-MANNOSAMINE	12.462	244.077	244.079	C8H15NO6	N-acyl-alpha-hexosamines	OVRNDRQMDRJTHS-ZTVVOAFPSA-N	CC(=O)N[C@H]1[C@H]([C@@H]([C@H](OC1O)CO)O)O	8.84959	99.9	22.7772
N-Acetylglutamine	10.8549	211.068	211.069	C7H12N2O4	Glutamine and derivatives	KSMRODHGGIIXDV-YFKPBYRVSA-N	CC(=O)N[C@@H](CCC(=O)N)C(=O)O	2.93743	100	20.6261
N-ACETYL-L-LEUCINE	19.962	174.111	174.112	C8H15NO3	Leucine and derivatives	WXNXCEHXYPACJF-ZETCQYMHSA-N	CC(C)C[C@@H](C(=O)O)NC(=O)C	8.44282	100	27.6939
N-ACETYL-L-PHENYLALANINE	10.6243	230.076	230.079	C11H13NO3	Phenylalanine and derivatives	CBQJSKKFNMDLON-JTQLQIEISA-N	CC(=O)N[C@@H](CC1=CC=CC=C1)C(=O)O	14.2125	99.8	30.0048
N-Acetylornithine	18.444	175.107	175.108	C7H14N2O3	N-acyl-L-alpha-amino acids	JRLGPAXAGHMNOL-LURJTMIESA-N	C/C(=N/[C@@H](CCCN)C(=O)O)/O	3.48357	100	20.1875
NAD	17.9313	664.118	664.116	C21H27N7O14P2	(5'->5')-dinucleotides	BAWFJGJZGIEFAR-NNYOXOHSSA-N	NC(=O)C1=C[N+](=CC=C1)[C@@H]1O[C@H](COP([O-])(=O)OP(O)(=O)OC[C@H]2O[C@H]([C@H](O)[C@@H]2O)N2C=NC3=C2N=CN=C3N)[C@@H](O)[C@H]1O	2.42427	99.9	29.4762
Nafadotride	7.39027	366.222	366.218	C22H27N3O2	Naphthalenecarboxamides	IDZASIQMRGPBCQ-UHFFFAOYSA-N	N#CC1=CC(C(O)=NCC2N(CCCC)CCC2)=C(OC)C=3C=CC=CC13	12.3151	99.6	26.685
N-ALPHA-ACETYL-L-ASPARAGINE	16.7579	175.07	175.071	C6H10N2O4	Asparagine and derivatives	HXFOXFJUNFFYMO-BYPYZUCNSA-N	CC(=O)N[C@@H](CC(=O)N)C(=O)O	5.88332	100	25.0178
N-ALPHA-ACETYLLYSINE	18.8468	211.104	211.105	C8H16N2O3	N-acyl-alpha amino acids	VEYYWZRYIYDQJM-UHFFFAOYSA-N	CC(=O)NC(CCCCN)C(O)=O	8.14759	99.9	100.972
N-butyl-N-(1-(cyclohexylamino)-1-oxobutan-2-yl)-4-methylpentanamide	3.82157	339.299	339.301	C20H38N2O2	N-acyl amines	SKTZFCRNZMJIPZ-UHFFFAOYSA-N	CCCCN(C(=O)CCC(C)C)C(CC)C(=O)NC1CCCCC1	3.83141	100	63.9513
N-Caffeoylputrescine, (E)-	19.4266	273.12	273.12	C13H18N2O3	Hydroxycinnamic acids and derivatives	KTZNZCYTXQYEHT-GQCTYLIASA-N	O=C(C=CC1=CC=C(O)C(O)=C1)NCCCCN	1.09842	100	23.0538
NCGC00091914-04!(2R,3R)-2,3-bis[[(E)-3-(3,4-dihydroxyphenyl)prop-2-enoyl]oxy]butanedioic acid	17.1718	492.115	492.114	C22H18O12	Tetracarboxylic acids and derivatives	YDDGKXBLOXEEMN-IABMMNSOSA-N	OC(=O)[C@H](OC(=O)\C=C\C1=CC=C(O)C(O)=C1)[C@@H](OC(=O)\C=C\C2=CC(O)=C(O)C=C2)C(O)=O	3.14968	100	37.0669
NCGC00095569-05!4,9-dimethoxyfuro[3,2-g]chromen-7-one	15.6005	264.085	264.087	C13H10O5	8-methoxypsoralens	DFMAXQKDIGCMTL-UHFFFAOYSA-N	COC1=C2OC(=O)C=CC2=C(OC)C3=C1OC=C3	7.34607	99.9	50.4434
NCGC00168836-03_C20H30O4_6,18,19-Trihydroxytrachyloban-2-one	4.13035	352.244	352.248	C20H30O4	Kaurane diterpenoids	WTOYNGQRGOLPNU-UHFFFAOYSA-N	CC12CC34CC(O)C5C(C)(CC(=O)CC5(CO)CO)C3CC1C2C4	12.8602	99.6	22.4525
NCGC00168840-03!5-(1,2,4a,5-tetramethyl-7-oxo-3,4,8,8a-tetrahydro-2H-naphthalen-1-yl)-3-methylpentanoic acid [IIN-based: Match]	4.3839	338.264	338.269	C20H32O3	Colensane and clerodane diterpenoids	RNWHJFUXZQBBLK-UHFFFAOYSA-N	CC(CCC1(C)C(C)CCC2(C)C1CC(=O)C=C2C)CC(O)=O	16.2001	99.4	49.8441
NCGC00169031-03![6-(2-formamido-3-methylbutanoyl)oxy-2,3,4,5-tetrahydroxyhexyl] 2-formamido-3-methylbutanoate [IIN-based on: CCMSLIB00000845461]	22.0781	401.188	401.192	C18H32N2O10	Alpha amino acid esters	DORNRAAPIXGDPH-UHFFFAOYSA-N	CC(C)C(NC=O)C(=O)OCC(O)C(O)C(O)C(O)COC(=O)C(NC=O)C(C)C	10.2943	99.7	28.2955
NCGC00169702-02!(5R)-5-hydroxy-1-(4-hydroxy-3-methoxyphenyl)decan-3-one [IIN-based on: CCMSLIB00000847635]	3.13665	611.362	611.355	C17H26O4	Gingerols	NLDDIKRKFXEWBK-CQSZACIVSA-N	CCCCC[C@@H](O)CC(=O)CCC1=CC(OC)=C(O)C=C1	10.8448	99.4	42.3875
NCGC00169733-03!(4S,5Z,6S)-4-(2-methoxy-2-oxoethyl)-5-[2-[(E)-3-phenylprop-2-enoyl]oxyethylidene]-6-[(2S,3R,4S,5S,6R)-3,4,5-trihydroxy-6-(hydroxymethyl)oxan-2-yl]oxy-4H-pyran-3-carboxylic acid [IIN-based: Match]	8.60562	551.177	551.176	C26H30O13	Terpene glycosides	JGHUOJAZXGSFRI-HOWDAYCMSA-N	COC(=O)C[C@H]1\\C(=C\\COC(=O)\\C=C\\C2=CC=CC=C2)[C@H](O[C@@H]3O[C@H](CO)[C@@H](O)[C@H](O)[C@H]3O)OC=C1C(O)=O	1.8143	100	90.7734
NCGC00169946-02!2-(1,2-dihydroxypentyl)-4-methoxy-2,3-dihydropyran-6-one [IIN-based: Match]	20.1192	248.148	248.149	C11H18O5	Dihydropyranones	YLHOHANRUSKHKO-UHFFFAOYSA-N	CCCC(O)C(O)C1CC(OC)=CC(=O)O1	5.84326	100	22.2967
NCGC00169961-02!4-hydroxy-3-[(2E,6E)-4-hydroxy-3,7,11-trimethyldodeca-2,6,10-trienyl]benzoic acid [IIN-based on: CCMSLIB00000847074]	16.6034	323.204	323.201	C22H30O4	Sesquiterpenoids	LSQRGMPMJOCLHX-GONBZBRSSA-N	CC(C)=CCC\\C(C)=C\\CC(O)C(\\C)=C\\CC1=C(O)C=CC(=C1)C(O)=O	9.40592	99.8	27.0779
NCGC00178646-02!2,4-dihydroxyheptadecyl acetate [IIN-based: Match]	3.57825	313.271	313.274	C19H38O4	Long-chain fatty alcohols	ZBVKFVTUHVIICH-UHFFFAOYSA-N	CCCCCCCCCCCCCC(O)CC(O)COC(C)=O	9.92742	99.8	61.8853
NCGC00179986-02!2-[[4-[2-[(2S,3R,4S,5S,6R)-3-acetyloxy-4,5-dihydroxy-6-(hydroxymethyl)oxan-2-yl]oxy-4-(2-hydroxy-4-methoxy-6-methylbenzoyl)oxy-6-methylbenzoyl]oxy-2-hydroxy-6-methylbenzoyl]amino]propanoic acid	3.11142	758.215	758.229	C36H39NO17	Hydrolyzable tannins	RBFOMTAWEHHDSX-TZHFLBFYSA-N	COC1=CC(O)=C(C(=O)OC2=CC(O[C@@H]3O[C@H](CO)[C@@H](O)[C@H](O)[C@H]3OC(C)=O)=C(C(=O)OC4=CC(O)=C(C(=O)NC(C)C(O)=O)C(C)=C4)C(C)=C2)C(C)=C1	18.5432	96.1	44.4397
NCGC00180209-02!4-methoxy-3-methylsulfanyl-2-(nitrosomethylidene)-6-pyridin-2-yl-1H-pyridine [IIN-based on: CCMSLIB00000848991]	17.5682	573.126	573.135	C13H13N3O2S	Dihydropyridines	FXPSZLHFJDHOMI-DHZHZOJOSA-N	COC1=C(SC)C(\\C=N\\O)=NC(=C1)C2=NC=CC=C2	15.6857	98.8	135.064
NCGC00180458-02_C18H24O12_Cyclopenta[c]pyran-4-carboxylic acid, 7-[(acetyloxy)methyl]-1-(beta-D-glucopyranosyloxy)-1,4a,5,7a-tetrahydro-5-hydroxy-, (1S,4aS,5S,7aS)-	18.7075	450.154	450.161	C18H24O12	Iridoid O-glycosides	DGDWCRWJRNMRKX-DILZHRMZSA-N	CC(=O)OC\C1=C\[C@H](O)[C@H]\2[C@@H]1[C@@H](O\C=C2C(O)=O)O[C@@H]3O[C@H](CO)[C@@H](O)[C@H](O)[C@H]3O	13.7951	99.2	32.1374
NCGC00180747-02!5-[(1S,2R,4aR)-1,2,4a,5-tetramethyl-7-oxo-3,4,8,8a-tetrahydro-2H-naphthalen-1-yl]-3-methylpentanoic acid [IIN-based on: CCMSLIB00000848900]	3.11142	663.456	663.46	C20H32O3	Colensane and clerodane diterpenoids	RNWHJFUXZQBBLK-VWJHISDNSA-N	CC(CC[C@@]1(C)[C@H](C)CC[C@]2(C)C1CC(=O)C=C2C)CC(O)=O	5.77277	99.8	27.3508
NCGC00180837-02!3,8-dihydroxy-3-methyl-2,4-dihydrobenzo[a]anthracene-1,7,12-trione [IIN-based on: CCMSLIB00000847997]	9.17905	305.085	305.081	C19H14O5	Angucyclines	UGEKKXLEYACFTD-UHFFFAOYSA-N	CC1(O)CC(=O)C2=C3C(=O)C4=C(C(O)=CC=C4)C(=O)C3=CC=C2C1	14.6191	99.6	30.0819
NCGC00347836-02_C22H32O7_Phenanthro[3,2-b]furan-9(1H)-one, 5-(acetyloxy)-2,3,4,4a,5,6,6a,7,10a,11,11a,11b-dodecahydro-6,10a-dihydroxy-4-(hydroxymethyl)-4,7,11b-trimethyl-	21.7321	391.217	391.212	C22H32O7	Naphthofurans	GWEGFCVAOPNYPT-UHFFFAOYSA-N	CC/1C2C(O)C(OC(C)=O)C3C(C)(CO)CCCC3(C)C2CC4(O)OC(=O)\C=C14	14.0078	99.4	32.6835
NCGC00380158-01!2-[2-[2-[[2-[2-(2-hydroxypropanoylamino)-3-methylbutanoyl]oxy-3-methylbutanoyl]amino]-3-methylbutanoyl]oxypropanoylamino]-3-methylbutanoic acid [IIN-based on: CCMSLIB00000845729]	19.7466	582.294	582.3	C26H45N3O10	Depsipeptides	YBUWNKPGCLTWJO-UHFFFAOYSA-N	CC(C)C(NC(=O)C(C)OC(=O)C(NC(=O)C(OC(=O)C(NC(=O)C(C)O)C(C)C)C(C)C)C(C)C)C(O)=O	10.3727	99.3	60.5986
NCGC00380161-01_C20H28O12_6-O-(Phenylacetyl)-alpha-D-glucopyranosyl alpha-D-glucopyranoside	10.8145	478.19	478.192	C20H28O12	O-glycosyl compounds	STSLPRRNSYCFTQ-JFRFVCMESA-N	OC[C@H]1O[C@H](O[C@H]2O[C@H](COC(=O)CC3=CC=CC=C3)[C@@H](O)[C@H](O)[C@H]2O)[C@H](O)[C@@H](O)[C@@H]1O	4.57975	99.9	20.8359
NCGC00380284-01!N-(5-acetamidopentyl)acetamide [IIN-based: Match]	7.55785	187.144	187.144	C9H18N2O2	Acetamides	FQKKPLXFGDCBJT-UHFFFAOYSA-N	CC(=O)NCCCCCNC(C)=O	0.534348	100	24.064
NCGC00380345-01!(2S,8R)-8-hydroxy-2-[(1S)-1-hydroxyheptyl]-2,3,4,6,7,8-hexahydrochromen-5-one [IIN-based on: CCMSLIB00000846680]	19.5111	305.171	305.172	C16H26O4	Benzopyrans	INHVGPIPHZJQOP-ZNMIVQPWSA-N	CCCCCC[C@H](O)[C@@H]1CCC2=C(O1)[C@H](O)CCC2=O	5.34124	99.9	21.2646
NCGC00380375-01!6-[(4E,6E)-2,3-dihydroxy-4,6-dimethyl-7-(1,2,4-trimethyl-3,6-dioxabicyclo[3.1.0]hexan-4-yl)hepta-4,6-dien-2-yl]-4-methoxy-3,5-dimethylpyran-2-one [IIN-based on: CCMSLIB00000847677]	18.8468	399.221	399.217	C24H34O7	Fatty alcohols	UXTZIHZDUIRZDY-JASOSIDASA-N	COC1=C(C)C(=O)OC(=C1C)C(C)(O)C(O)C(\\C)=C\\C(C)=C\\C2(C)OC(C)C3(C)OC23	10.9965	99.6	54.1853
NCGC00380415-01!5,7-dihydroxy-2-(4-hydroxyphenyl)-3-[3,5,7-trihydroxy-2-(4-hydroxyphenyl)-3,4-dihydro-2H-chromen-8-yl]-2,3-dihydrochromen-4-one [IIN-based: Match]	15.6446	562.172	562.171	C30H24O10	Biflavonoids and polyflavonoids	YHJDRJVMBSUEDI-UHFFFAOYSA-N	OC1CC2=C(O)C=C(O)C(C3C(OC4=CC(O)=CC(O)=C4C3=O)C5=CC=C(O)C=C5)=C2OC1C6=CC=C(O)C=C6	2.52592	100	26.1895
NCGC00380424-01_C10H9NO4_1,5-(Epoxymethano)cyclopenta[c]pyran-3-carboxamide, 1,4a,5,7a-tetrahydro-8-oxo-	14.4625	208.061	208.06	C10H9NO4	Delta valerolactones	NBVNAFAEYGKTPJ-UHFFFAOYSA-N	O=C1OC2OC(=CC3C1C=CC23)C(=N)O	3.17216	100	21.6395
NCGC00380484-01_C22H36O12_beta-D-Glucopyranose, 6-O-beta-D-glucopyranosyl-1-O-[(2,6,6-trimethyl-1-cyclohexen-1-yl)carbonyl]-	10.7071	515.211	515.21	C22H36O12	O-glycosyl compounds	URTXXFGOVQACIC-UHFFFAOYSA-N	CC/1=C(C(=O)OC2OC(COC3OC(CO)C(O)C(O)C3O)C(O)C(O)C2O)/C(C)(C)CCC1	1.35867	100	41.4493
NCGC00380601-01!N-[1-(4-methoxy-6-oxopyran-2-yl)-2-methylpropyl]acetamide [IIN-based: Match]	9.59388	240.12	240.123	C12H17NO4	Pyranones and derivatives	WCMUUYZSUQJWRX-UHFFFAOYSA-N	COC1=CC(=O)OC(=C1)C(NC(C)=O)C(C)C	10.5363	99.9	27.657
NCGC00380698-01_C24H30O13_Cyclopenta[c]pyran-4-carboxylic acid, 1-(beta-D-glucopyranosyloxy)-1,4a,5,6,7,7a-hexahydro-4a-hydroxy-7-methyl-5-oxo-, 2-(3,4-dihydroxyphenyl)ethyl ester, (1S,4aR,7aR)-	8.4066	527.186	527.176	C24H30O13	Iridoid O-glycosides	KQBFNIVRWYGXRN-QJMXJWGSSA-N	CC1CC(=O)[C@@]\2(O)[C@@H]1[C@@H](O\C=C2C(=O)OCCC3=CC(=C(O)C=C3)O)O[C@@H]4O[C@H](CO)[C@@H](O)[C@H](O)[C@H]4O	18.3999	98.1	20.3798
NCGC00380778-01_C9H14N2O3_(3S,8aS)-3-[(1R)-1-Hydroxyethyl]hexahydropyrrolo[1,2-a]pyrazine-1,4-dione	21.8981	199.105	199.108	C9H14N2O3	Alpha amino acids and derivatives	UBLWFFBGMBRBMC-UHFFFAOYSA-N	CC(O)C1NC(=O)C2CCCN2C1=O	15.6197	99.8	62.4236
NCGC00380824-01!1-[(Z)-but-2-en-2-yl]-2,8,10-trichloro-3,9-dihydroxy-4,7-dimethylbenzo[b][1,4]benzodioxepin-6-one	21.7294	429	429.006	C19H15Cl3O5	Depsides and depsidones	XEQDVQKKHOQZEP-WAYWQWQTSA-N	C\C=C(\C)C1=C(Cl)C(O)=C(C)C2=C1OC3=C(Cl)C(O)=C(Cl)C(C)=C3C(=O)O2	12.9835	99.4	22.3096
NCGC00380828-01_C20H28O3_	3.87163	334.244	334.238	C20H28O3	Diterpene lactones	AHKUFTRUMQKIPH-VQFHSHCMSA-N	C[C@]12CCC[C@]3(C)[C@H]1[C@@H](OC3=O)[C@H](O)[C@@]45C[C@@H](CC[C@@H]24)C(=C)C5	18.9386	99.2	23.0551
NCGC00380830-01!methyl 2-[(2-hydroxy-3-methylbutanoyl)amino]-3-methylbutanoate [IIN-based on: CCMSLIB00000845070]	10.6469	254.137	254.136	C11H21NO4	N-acyl-alpha amino acids and derivatives	DYTVYDVNJBXBMW-UHFFFAOYSA-N	COC(=O)C(NC(=O)C(O)C(C)C)C(C)C	4.01359	100	23.2109
NCGC00380843-01!5,7-dihydroxy-2-(4-methoxyphenyl)-3-[3,5,7-trihydroxy-2-(4-hydroxyphenyl)-3,4-dihydro-2H-chromen-6-yl]-2,3-dihydrochromen-4-one	10.6703	559.153	559.16	C31H26O10	Pyranoisoflavonoids	BKPFUQLDJWNCIK-UHFFFAOYSA-N	COC1=CC=C(C=C1)C2OC3=CC(O)=CC(O)=C3C(=O)C2C4=C(O)C=C5OC(C(O)CC5=C4O)C6=CC=C(O)C=C6	11.5352	99.2	39.014
NCGC00380844-01_C19H25NO10_beta-D-Glucopyranoside, 1H-indol-3-yl 6-O-[(2R,3R,4R)-tetrahydro-3,4-dihydroxy-4-(hydroxymethyl)-2-furanyl]-	19.1456	450.135	450.137	C19H25NO10	O-glycosyl compounds	PCEVWHNBXIFFPJ-OTCFHACESA-N	OC[C@@]1(O)CO[C@@H](OC[C@H]2O[C@@H](OC3=C[NH]C4=CC=CC=C34)[C@H](O)[C@@H](O)[C@@H]2O)[C@@H]1O	5.44279	99.9	37.8592
NCGC00380913-01_C20H28O5_2(3H)-Furanone, 5-[4-[1-(acetyloxy)-4-oxo-5-[(2Z)-2-penten-1-yl]-2-cyclopenten-1-yl]butyl]dihydro-	4.3839	366.228	366.228	C20H28O5	Prostaglandins and related compounds	ARNKLTDIWFIVMO-PLNGDYQASA-N	CC\C=C/CC1C(=O)\C=C/C1(CCCCC2CCC(=O)O2)OC(C)=O	0.245749	100	34.8446
NCGC00381078-01!3-[4-hydroxy-5-methoxy-2-[(2S,3R,4S,5S,6R)-3,4,5-trihydroxy-6-(hydroxymethyl)oxan-2-yl]oxyphenyl]-2-(2-oxochromen-7-yl)oxypropanoic acid [IIN-based: Match]	8.60947	552.177	552.171	C25H26O13	Phenolic glycosides	JTLPHVAPUJVXEJ-AYXSYUOHSA-N	COC1=C(O)C=C(O[C@@H]2O[C@H](CO)[C@@H](O)[C@H](O)[C@H]2O)C(CC(OC3=CC=C4C=CC(=O)OC4=C3)C(O)=O)=C1	10.2504	99.4	34.1014
NCGC00381167-01!(E)-3-(4-hydroxy-3-methoxyphenyl)prop-2-enamide	11.7555	216.064	216.063	C10H11NO3	Hydroxycinnamic acids and derivatives	YYAJJKZSQWOLIP-HWKANZROSA-N	COC1=C(O)C=CC(\C=C\C(N)=O)=C1	2.26786	100	29.4779
NCGC00381255-01!8-hydroxy-3-methoxycarbonyl-2-methylidenenonanoic acid [IIN-based on: CCMSLIB00000848611]	19.8435	262.163	262.165	C12H20O5	Medium-chain hydroxy acids and derivatives	QSAIBULZNVPLAJ-UHFFFAOYSA-N	COC(=O)C(CCCCC(C)O)C(=C)C(O)=O	6.44632	99.9	22.5078
NCGC00381347-01!5-acetamido-4-oxohexanoic acid	16.4991	188.09	188.092	C8H13NO4	Medium-chain keto acids and derivatives	QSRUAKBTZTXXLM-UHFFFAOYSA-N	CC(NC(C)=O)C(=O)CCC(O)=O	8.71915	99.9	141.306
NCGC00381349-01_C11H13NO5_1H-Pyrrole-3-propanoic acid, 5-acetyl-4-(carboxymethyl)-	9.33825	222.074	222.076	C11H13NO5	Aryl alkyl ketones	PFTVGDRYNNORCU-UHFFFAOYSA-N	CC(=O)C1=C(CC(O)=O)C(=C[NH]1)CCC(O)=O	9.81646	99.9	21.839
NCGC00381405-01!7-hydroxy-3,5-dimethylisochromen-1-one	19.831	191.071	191.07	C11H10O3	Isocoumarins and derivatives	LAPUFWKKGOUUAN-UHFFFAOYSA-N	CC1=CC2=C(C)C=C(O)C=C2C(=O)O1	1.72711	100	42.2131
NCGC00381425-01!8-hydroxy-8-(3-octyloxiran-2-yl)octanoic acid [IIN-based: Match]	13.2357	356.279	356.28	C18H34O4	Lineolic acids and derivatives	GQEOLYBERRZZCE-UHFFFAOYSA-N	CCCCCCCCC1OC1C(O)CCCCCCC(O)=O	2.07702	100	56.0213
NCGC00384673-01_C28H34O5_17-(3-Furyl)-4,4,8-trimethyl-3,16-dioxoandrosta-1,14-dien-7-yl acetate	19.0555	451.248	451.248	C28H34O5	Limonoids	KWAMDQVQFVBEAU-ABTVBUHUSA-N	CC(=O)O[C@@H]1CC2C(C)(C)C(=O)\C=C/[C@]2(C)C3CC[C@@]\4(C)[C@H](C(=O)\C=C4[C@]13C)C5=COC=C5	0.686984	100	23.7523
NCGC00384865-01!5-hydroxy-7-[4-hydroxy-2-methoxy-3-(3-methylbut-2-enyl)phenyl]-2,2-dimethyl-7,8-dihydropyrano[3,2-g]chromen-6-one [IIN-based on: CCMSLIB00000846956]	9.63443	459.176	459.178	C26H28O6	3'-prenylated isoflavanones	QJFJALJGKXGWFO-UHFFFAOYSA-N	COC1=C(C=CC(O)=C1CC=C(C)C)C2COC3=CC4=C(C=CC(C)(C)O4)C(O)=C3C2=O	3.26671	100	22.6491
NCGC00384884-01_C22H36O4_	9.05578	387.25	387.251	C22H36O4	Diterpenoids	NJMFZDTYMRZXER-UHFFFAOYSA-N	CC(CCC1C(=C)CCC2C(C)(CCCC12C)COC(C)=O)CC(O)=O	0.464815	100	101.103
NCGC00385107-01_C23H32O9_Cyclohexaneacetic acid, 6-[4-(acetyloxy)-3-hydroxy-2-methylene-1-oxobutoxy]-4-ethenyl-2-hydroxy-3-[1-(hydroxymethyl)ethenyl]-4-methyl-alpha-methylene-, methyl ester	21.0544	475.194	475.194	C23H32O9	Elemane sesquiterpenoids	XTMCUUVQSGQNSI-UHFFFAOYSA-N	COC(=O)C(=C)C1C(O)C(C(=C)CO)C(C)(CC1OC(=O)C(=C)C(O)COC(C)=O)C=C	0.10522	100	32.0223
NCGC00385199-01!2-[3,4-bis[[(2S,3R,4S,5S,6R)-3,4,5-trihydroxy-6-(hydroxymethyl)oxan-2-yl]oxy]phenyl]-5,7-dihydroxychromen-4-one	3.15618	628.196	628.187	C27H30O16	Flavonoid O-glycosides	XKAYFELZCPZDEK-IPOZFMEPSA-N	OC[C@H]1O[C@@H](OC2=C(O[C@@H]3O[C@H](CO)[C@@H](O)[C@H](O)[C@H]3O)C=C(C=C2)C4=CC(=O)C5=C(O)C=C(O)C=C5O4)[C@H](O)[C@@H](O)[C@@H]1O	14.0245	98.5	50.5724
NCGC00385265-01_C20H27NO11_(2S)-{[6-O-(beta-D-Glucopyranosyl)-beta-D-glucopyranosyl]oxy}(phenyl)acetonitrile	21.0814	475.191	475.192	C20H27NO11	Cyanogenic glycosides	XUCIJNAGGSZNQT-UUGBRMIUSA-N	OC[C@H]1O[C@@H](OC[C@H]2O[C@@H](O[C@H](C#N)C3=CC=CC=C3)[C@H](O)[C@@H](O)[C@@H]2O)[C@H](O)[C@@H](O)[C@@H]1O	2.16754	100	45.4776
NCGC00385410-01!2,3-dihydroxypropyl 3-hydroxy-13-methyltetradecanoate [IIN-based: Match]	4.04962	350.284	350.29	C18H36O5	Fatty alcohols	OQLFZIMUPPRHDP-UHFFFAOYSA-N	CC(C)CCCCCCCCCC(O)CC(=O)OCC(O)CO	17.6996	99.2	41.6215
NCGC00385456-01!2-(3-hexyl-4-methyl-2,5-dioxopyrrol-1-yl)-3-hydroxybutanoic acid	18.8098	315.191	315.191	C15H23NO5	Alpha amino acids and derivatives	PDIJXNGNSUILEE-UHFFFAOYSA-N	CCCCCCC1=C(C)C(=O)N(C(C(C)O)C(O)=O)C1=O	0.444174	100	29.3213
NCGC00385817-01!(2E,4E)-N-(2-methylpropyl)deca-2,4-dienamide	3.98142	224.201	224.201	C14H25NO	N-acyl amines	MAGQQZHFHJDIRE-BNFZFUHLSA-N	CCCCC\C=C\C=C\C(=O)NCC(C)C	0.892057	100	22.3709
NCGC00385824-01!methyl 2,4,10-triacetyloxy-5,9-dihydroxy-1,4a-dimethyl-7-propan-2-yl-2,3,4,9,10,10a-hexahydrophenanthrene-1-carboxylate [IIN-based on: CCMSLIB00000847882]	3.99903	503.228	503.228	C27H36O10	1-hydroxysteroids	CDYGRHOHQUXDMN-UHFFFAOYSA-N	COC(=O)C1(C)C(CC(OC(C)=O)C2(C)C1C(OC(C)=O)C(O)C3=C2C(O)=CC(=C3)C(C)C)OC(C)=O	0.854484	100	32.9398
NCGC00385952-01_C15H26O_1,7-Dimethyl-7-(4-methyl-3-penten-1-yl)bicyclo[2.2.1]heptan-2-ol	7.60583	264.231	264.232	C15H26O	Sesquiterpenoids	SGAYOTORECIFCJ-UHFFFAOYSA-N	CC(C)=CCCC1(C)C2CCC1(C)C(O)C2	2.95195	100	23.3595
NCGC00386083-01!dimethyl (2E,6E,11Z)-19-(2-amino-2-oxoethyl)-9,13-dihydroxy-8-methoxy-10,12,14-trimethyl-15-oxohenicosa-2,6,11-trienedioate [IIN-based on: CCMSLIB00000846986]	14.4553	536.326	536.322	C29H47NO9	Fatty acid methyl esters	BJMXBTRNBWZGEQ-FKYXSWMHSA-N	COC(\\C=C\\CC\\C=C\\C(=O)OC)C(O)C(C)\\C=C(\\C)C(O)C(C)C(=O)CCCC(CC(N)=O)CC(=O)OC	6.93613	99.8	20.8071
N-coronafacoyl-L-isoleucine	4.07393	322.199	322.201	C18H27NO4	Isoleucine and derivatives	RKSQYDBORLFRPF-UHFFFAOYSA-N	CCC(C)C(NC(=O)C1=CC(CC)CC2C1CCC2=O)C(O)=O	7.41772	99.9	27.6057
N-Cyclohexylformamide	8.32368	128.106	128.107	C7H13NO	Secondary carboxylic acid amides	SWGXDLRCJNEEGZ-UHFFFAOYSA-N	OC=NC1CCCCC1	9.28911	100	60.0335
Nephrosteranic acid	14.0205	316.247	316.248	C17H30O4	Gamma butyrolactones	PKXAQFKGSXYQJX-YMAMQOFZSA-N	CCCCCCCCCCCC1[C@H](C(=O)O)C(C)C(=O)O1	2.62452	100	39.8053
N-Isovalerylglycine	15.976	160.095	160.097	C7H13NO3	N-acyl-alpha amino acids	ZRQXMKMBBMNNQC-UHFFFAOYSA-N	O=C(O)CN=C(O)CC(C)C	13.8666	99.9	60.1998
N-METHYL-L-GLUTAMATE	16.614	162.078	162.076	C6H11NO4	Glutamic acid and derivatives	XLBVNMSMFQMKEY-BYPYZUCNSA-N	CN[C@@H](CCC(=O)O)C(=O)O	9.37831	100	327.15
N-Methyl-L-proline; CE0; CWLQUGTUXBXTLF-YFKPBYRVSA-N	8.4019	130.086	130.086	C6H11NO2	Proline and derivatives	CWLQUGTUXBXTLF-YFKPBYRVSA-N	CN1CCC[C@H]1C(=O)O	3.53612	100	28.4584
N-Octyl-2-pyrrolidone	7.56048	198.185	198.185	C12H23NO	N-alkylpyrrolidines	WPPOGHDFAVQKLN-UHFFFAOYSA-N	CCCCCCCCN1CCCC1=O	2.72472	100	26.6703
N-Oleoylethanolamine	3.72175	326.309	326.305	C20H39NO2	N-acylethanolamines	BOWVQLFMWHZBEF-MDZDMXLPSA-N	CCCCCCCCC=CCCCCCCCC(=O)NCCO	9.92935	99.8	32.5902
Nortriptyline	21.0152	264.169	264.175	C19H21N	Dibenzocycloheptenes	PHVGLTMQBUFIQQ-UHFFFAOYSA-N	CNCCC=C1C2=CC=CC=C2CCC3=CC=CC=C31	19.9868	99.4	207.185
O-Acetylserine	16.298	130.048	130.05	C5H9NO4	L-alpha-amino acids	VZXPDPZARILFQX-UHFFFAOYSA-N	CC(=O)OCC(C(=O)O)N	18.2238	99.9	32.2242
Ortophosphate	3.43728	98.9827	98.9842	H3O4P	Non-metal phosphates	NBIIXXVUZAFLBC-UHFFFAOYSA-N	OP(=O)(O)O	14.7498	100	139.763
Palmatine Chloride	14.9759	410.108	410.11	C21H22ClNO4	Protoberberine alkaloids and derivatives	RLQYRXCUPVKSAW-UHFFFAOYSA-M	[Cl-].O(C=1C=CC2=CC=3C4=CC(OC)=C(OC)C=C4CC[N+]3C=C2C1OC)C	4.60852	99.9	22.5457
Palmitoleoyl Ethanolamide	3.98823	320.256	320.256	C18H35NO2	N-acylethanolamines	WFRLANWAASSSFV-FPLPWBNLSA-N	CCCCCC/C=C\CCCCCCCC(=O)NCCO	0.905526	100	27.4437
Panthenol	19.8082	206.136	206.139	C9H19NO4	N-acyl amines	SNPLKNRPJHDVJA-ZETCQYMHSA-N	OC(=NCCCO)C(O)C(C)(C)CO	11.109	99.9	25.9539
Patulin	15.1174	172.058	172.06	C7H6O4	Pyrans	ZRWPUFFVAOMMNM-UHFFFAOYSA-N	O=C1OC2=CCOC(O)C2=C1	13.5999	99.9	32.8853
paxilline	19.1678	436.255	436.25	C27H33NO4	Naphthopyrans	ACNHBCIZLNNLRS-FAWQAIAASA-N	O=C1C=C2C(OC1C(O)(C)C)CCC3(C)C2(O)CCC4CC=5C=6C=CC=CC6NC5C43C	10.5444	99.6	35.6055
PCB 28	14.1672	256.964	256.969	C12H7Cl3	Polychlorinated biphenyls	BZTYNSQSZHARAZ-UHFFFAOYSA-N	ClC1=CC=C(C=C1)C1=C(Cl)C=C(Cl)C=C1	18.2902	99.6	27.6412
peiminine	14.5513	452.309	452.31	C27H43NO3	Cerveratrum-type alkaloids	IQDIERHFZVCNRZ-YUYPDVIUSA-N	O=C1CC2C3CCC4C(CN5CC(C)CCC5C4(O)C)C3CC2C6(C)CCC(O)CC16	1.7687	100	20.654
Pesticide5_Mefenacet_C16H14N2O2S_Acetamide, 2-(2-benzothiazolyloxy)-N-methyl-N-phenyl-	19.468	321.065	321.067	C16H14N2O2S	Benzothiazoles	XIGAUIHYSDTJHW-UHFFFAOYSA-N	CN(C1=CC=CC=C1)C(=O)COC2=NC3=CC=CC=C3S2	5.69975	99.9	27.175
Pesticide6_Fuberidazole_C11H8N2O_2-(2-Furyl)-1H-benzimidazole	21.1215	185.073	185.071	C11H8N2O	Benzimidazoles	UYJUZNLFJAWNEZ-UHFFFAOYSA-N	C1=CC=C2C(=C1)NC(=N2)C3=CC=CO3	11.1309	99.9	21.3883
Phenethylacetate	7.79708	165.091	165.091	C10H12O2	Benzene and substituted derivatives	MDHYEMXUFSJLGV-UHFFFAOYSA-N	O=C(OCCC=1C=CC=CC1)C	0	100	21.1436
PHENYLETHANOLAMINE	8.14937	138.091	138.091	C8H11NO	Aralkylamines	ULSIYEODSMZIPX-UHFFFAOYSA-N	C1=CC=C(C=C1)C(CN)O	1.01382	100	32.0403
phenylethylamide 275	3.90842	276.228	276.232	C18H29NO	N-acyl amines	XDDJYYVXLXUTSA-UHFFFAOYSA-N	O=C(CCCCCCCCC)NCCC1=CC=CC=C1	13.6841	99.7	21.5772
Phosphotyrosine	21.5492	262.051	262.047	C9H12NO6P	Phenylalanine and derivatives	DCWXELXMIBXGTH-UHFFFAOYSA-N	O=C(O)C(N)CC1=CC=C(OP(=O)(O)O)C=C1	12.2497	99.8	20.5853
Phthalamic acid	14.4501	166.047	166.05	C8H7NO3	Benzoic acids	CYMRPDYINXWJFU-UHFFFAOYSA-N	NC(=O)C1=CC=CC=C1C(O)=O	19.6929	99.8	23.1756
Pinacidil	17.9073	246.171	246.171	C13H19N5	Pyridines and derivatives	IVVNZDGDKPTYHK-UHFFFAOYSA-N	N#CN=C(N=C1C=CNC=C1)NC(C)C(C)(C)C	1.74675	100	31.2268
Premycofactocinol	8.7214	236.127	236.128	C13H17NO3	1-hydroxy-2-unsubstituted benzenoids	RNRPPZYXOJFWQP-UHFFFAOYSA-N	OC1=CC=C(CC2NC(O)=C(O)C2(C)C)C=C1	5.12434	100	25.4434
Proline betaine; CE0; CMUNUTVVOOHQPW-LURJTMIESA-N	18.901	144.103	144.102	C7H13NO2	Proline and derivatives	CMUNUTVVOOHQPW-LURJTMIESA-N	C[N+]1(C)CCC[C@H]1C(=O)[O-]	6.87014	100	2171.4
Propionylcarnitine	19.0502	218.137	218.139	C10H19NO4	Acyl carnitines	UFAHZIUFPNSHSL-UHFFFAOYSA-N	O=C([O-])CC(OC(=O)CC)C[N+](C)(C)C	10.0395	99.9	22.3119
Propylthiouracil	18.7075	171.062	171.059	C7H10N2OS	Pyrimidones	KNAHARQHSZJURB-UHFFFAOYSA-N	C1=C(NC(NC1=O)=S)CCC	17.2455	99.8	23.0855
Prosulfocarb	21.2381	252.142	252.142	C14H21NOS	Benzene and substituted derivatives	NQLVQOSNDJXLKG-UHFFFAOYSA-N	CCCN(CCC)C(=O)SCc1ccccc1	1.74505	100	21.0644
protopanaxadiol	9.41183	483.377	483.38	C30H52O3	Triterpenoids	PYXFVCFISTUSOO-DUQNUXOISA-N	OC1CC2C3(C)CCC(O)C(C)(C)C3CCC2(C)C4(C)CCC(C14)C(O)(C)CCC=C(C)C	6.41317	99.8	29.7394
p-Toluenesulfonamide	14.7779	172.041	172.043	C7H9NO2S	P-toluenesulfonamides	LMYRWZFENFIFIT-UHFFFAOYSA-N	CC1=CC=C(C=C1)S(N)(=O)=O	11.5088	99.9	25.5136
PYRIDOXAL	7.39027	190.048	190.047	C8H9NO3	Pyridoxals and derivatives	RADKZDMFGJYCBB-UHFFFAOYSA-N	CC1=C(O)C(C=O)=C(CO)C=N1	5.4197	100	24.1792
PYRIDOXINE	19.7626	187.106	187.108	C8H11NO3	Pyridoxines	LXNHXLLTXMVWPM-UHFFFAOYSA-N	OC=1C(=NC=C(C1CO)CO)C	9.67357	99.9	149.51
Pyroglutamic acid (not validated, isomer of 89); PlaSMA ID-88	18.2401	130.05	130.05	C5H7NO3	Amino acids	ODHCTXKNWHHXJC-UHFFFAOYNA-N	O=C(O)C1NC(=O)CC1	1.53787	100	26.3366
Pyrrol	16.1684	68.0488	68.0495	C4H5N	Heteroaromatic compounds	KAESVJOAVNADME-UHFFFAOYSA-N	N1C=CC=C1	9.84578	100	27.352
Pyrrolidine; CE0; RWRDLPDLKQPQOW-UHFFFAOYSA-N	15.9513	72.0802	72.0808	C4H9N	Pyrrolidines	RWRDLPDLKQPQOW-UHFFFAOYSA-N	C1CCNC1	8.46273	100	25.4385
Quercetin 3-O-alpha-L-Arabinopyranoside	8.11742	435.085	435.09	C20H18O11	Flavonoid-3-O-glycosides	PZZRDJXEMZMZFD-IEGSVRCHSA-N	O=C1C(OC2OCC(O)C(O)C2O)=C(OC=3C=C(O)C=C(O)C13)C=4C=CC(O)=C(O)C4	11.262	99.5	20.794
QUINATE	20.1288	193.069	193.071	C7H12O6	Quinic acids and derivatives	AAWZDTNXLSGCEK-LNVDRNJUSA-N	C1[C@H](C([C@@H](CC1(C(=O)O)O)O)O)O	10.6697	99.9	22.2807
Raffinose	15.9108	505.175	505.176	C18H32O16	Oligosaccharides	MUPFEKGTMRGPLJ-ZQSKZDJDSA-N	OCC1OC(OCC2OC(OC3(OC(CO)C(O)C3O)CO)C(O)C(O)C2O)C(O)C(O)C1O	2.57336	100	22.7506
Rhodiolin	18.329	481.111	481.11	C25H20O10	Flavonolignans	POVCYOFRCMBMKD-LMNIDFBRSA-N	O=C1C(O)=C(OC2=C3OC(CO)C(OC3=CC(O)=C12)C4=CC=C(O)C(OC)=C4)C=5C=CC(O)=CC5	2.51502	100	25.4809
RIBOFLAVIN	9.67282	377.145	377.146	C17H20N4O6	Flavins	AUNGANRZJHBGPY-SCRDCRAPSA-N	CC1=CC2=C(C=C1C)N(C3=NC(=O)NC(=O)C3=N2)C[C@@H]([C@@H]([C@@H](CO)O)O)O	1.2462	100	20.4463
RICININE	19.186	182.089	182.092	C8H8N2O2	3-pyridinecarbonitriles	PETSAYFQSGAEQY-UHFFFAOYSA-N	N#CC1=C(OC)C=CN(C1=O)C	19.2759	99.8	26.4109
Riluzole	19.8057	235.018	235.015	C8H5F3N2OS	Benzothiazoles	FTALBRSUTCGOEG-UHFFFAOYSA-N	FC(F)(F)OC1=CC=C2NC(=N)SC2=C1	12.595	99.8	33.5946
Rosmanol	18.8468	345.199	345.2	C20H26O5	Diterpene lactones	LCAZOMIGFDQMNC-FORWCCJISA-N	O=C1OC2C(O)C3=CC(=C(O)C(O)=C3C14CCCC(C)(C)C24)C(C)C	3.50521	100	60.093
ROTENONIC ACID, METHYL ETHER	7.80907	449.131	449.136	C24H26O6	Rotenones	QADCCYSYLNTZHV-YADHBBJMSA-N	O=C1C2=CC=C(OC)C(=C2OC3COC4=CC(OC)=C(OC)C=C4C13)CC=C(C)C	12.2012	99.4	51.465
S4:17(P3:15/F1:2)	16.778	654.321	654.333	C29H48O15	Saccharolipids	AKPIJPQIDBGCGR-UHFFFAOYSA-N	CCCCC(=O)OC1C(CO)OC(OC2(CO)OC(CO)C(OC(C)=O)C2O)C(OC(=O)CCCC)C1OC(=O)CCCC	18.0795	97.2	21.4276
Salicylanilide	8.32953	214.087	214.086	C13H11NO2	Benzanilides	WKEDVNSFRWHDNR-UHFFFAOYSA-N	OC1=C(C=CC=C1)C(=O)NC1=CC=CC=C1	2.98945	100	21.9647
Sanguinarium chloride	15.892	368.066	368.069	C20H14ClNO4	Quaternary benzophenanthridine alkaloids	GIZKAXHWLRYMLE-UHFFFAOYSA-M	[Cl-].O1C=2C=CC3=C4C=CC=5C=C6OCOC6=CC5C4=[N+](C=C3C2OC1)C	8.42233	99.8	20.0977
Schinifoline	20.9547	258.179	258.18	C17H23NO	Hydroquinolones	HCUSLQJBGQJQCB-UHFFFAOYSA-N	O=C1C=C(N(C=2C=CC=CC12)C)CCCCCCC	2.67255	100	43.7098
Securinine	7.6168	256.074	256.073	C13H15NO2	Indolizidines	SWZMSZQQJRKFBP-WZRBSPASSA-N	O=C1OC23C(C=CC(N4CCCCC42)C3)=C1	1.05439	100	21.0127
SH373-1	18.5175	374.223	374.229	C17H31N3O6	Peptides	UKFUHWPKKCYCQR-UHFFFAOYSA-N	O=C(O)C(N=C(O)C(N=C(O)CCC(N)C(=O)O)C(C)CC)CC(C)C	15.1779	99.4	69.3814
Shikimic Acid	16.463	192.085	192.087	C7H10O5	Shikimic acids and derivatves	JXOHGGNKMLTUBP-HSUXUTPPSA-N	O=C(O)C1=CC(O)C(O)C(O)C1	7.54868	100	357.635
sophocarpine	21.8267	247.18	247.18	C15H22N2O	Matrine alkaloids	AAGFPTSOPGCENQ-KYEXWDHISA-N	O=C1C=CCC2N1CC3CCCN4CCCC2C43	0.849583	100	20.2041
Sorbitol	13.2113	221.045	221.042	C6H14O6	Sugar alcohols	FBPFZTCFMRRESA-JGWLITMVSA-N	OCC(O)C(O)C(O)C(O)CO	10.9029	99.9	28.4873
Soyasapogenol B	4.43233	481.36	481.36	C30H50O3	Triterpenoids	YOQAQNKGFOLRGT-UXXABWCISA-N	OCC1(C)C(O)CCC2(C)C3CC=C4C5CC(C)(C)CC(O)C5(C)CCC4(C)C3(C)CCC12	0.0207745	100	23.5426
Sphinganine (d18:0)	3.75822	324.286	324.287	C18H39NO2	1,2-aminoalcohols	OTKJDMGTUTTYMP-ZWKOTPCHSA-N	CCCCCCCCCCCCCCC[C@H]([C@H](CO)N)O	5.21143	99.9	27.5333
SPI_270.2429_14.9	3.89447	270.24	270.243	C16H31NO2	Ketals	YYICKHZBDGQJBW-UHFFFAOYSA-N	CCCNCC1COC2(CCC(CC2)C(C)(C)C)O1	12.1002	99.8	45.6481
Spiroxamine	4.3874	298.273	298.274	C18H35NO2	Ketals	PUYXTUJWRLOUCW-UHFFFAOYSA-N	CCCN(CC)CC1COC2(CCC(CC2)C(C)(C)C)O1	2.1792	100	180.773
Taurine	14.8038	126.023	126.022	C2H7NO3S	Organosulfonic acids	XOAAWQZATWQOTB-UHFFFAOYSA-N	C(CS(=O)(=O)O)N	5.23718	100	39.9705
terracinolide J	15.8427	789.328	789.33	C38H54O16	Delta valerolactones	AWVNBSKIKNPOBG-TUFUNITNSA-N	O[C@]12[C@@]([C@@H](OC(C)=O)[C@@](OC(C)=O)(C)C2)([H])[C@@H](OC3=O)[C@](CC3)(OC(C(C)C)=O)[C@H](OC(C(C)C)=O)[C@@H](OC(C)=O)[C@@H](OC(C)=O)C(C)(C)/C=C/[C@H](C)C1=O	2.63514	99.9	22.3637
tetradec-5-ynoic acid	21.8267	247.164	247.167	C14H24O2	Long-chain fatty acids	RHOQRBVFJSAQTR-UHFFFAOYSA-N	O=C(O)CCCC#CCCCCCCCC	12.3398	99.8	21.9115
Theophylline	12.5325	203.051	203.05	C7H8N4O2	Xanthines	ZFXYFBGIUFBOJW-UHFFFAOYSA-N	O=C1C=2NC=NC2N(C(=O)N1C)C	3.93992	100	92.5839
Threonylleucine (isomer of 925, 926); PlaSMA ID-926	21.8645	233.147	233.149	C10H20N2O4	Dipeptides	BQBCIBCLXBKYHW-UHFFFAOYNA-N	O=C(O)C(NC(=O)C(N)C(O)C)CC(C)C	6.00476	100	38.071
THYMIDINE-MONOPHOSPHATE	11.6801	345.05	345.046	C10H15N2O8P	Pyrimidine 2'-deoxyribonucleoside monophosphates	GYOZYWVXFNDGLU-XLPZGREQSA-N	CC1=CN([C@H]2C[C@H](O)[C@@H](COP(O)(O)=O)O2)C(=O)NC1=O	13.2156	99.6	23.2388
thymol	19.0208	173.09	173.09	C10H14O	Aromatic monoterpenoids	MGSRCZKZVOBKFT-UHFFFAOYSA-N	OC1=CC(=CC=C1C(C)C)C	1.7332	100	188.175
Tjipanazole B	8.23133	457.072	457.072	C23H18Cl2N2O4	Indolocarbazoles	JEOAJYYDZYNEAH-YJSIEXFISA-N	ClC1=CC2=C(N([C@@H]3OC[C@@H](O)[C@H](O)[C@H]3O)C4=C2C=CC5=C4NC6=C5C=C(Cl)C=C6)C=C1	1.05016	100	22.617
Tobramycin 2 -N- or 6 -N-carbamoyl	18.5175	511.271	511.272	C19H38N6O10	4,6-disubstituted 2-deoxystreptamines	BXUDMXDCTTUXLQ-PBSUHMDJSA-N	O[C@H]1[C@H](N)[C@@H](O)[C@@H](O[C@H]2[C@H](N)C[C@H](N)[C@@H](O[C@@H]3[C@H](N)C[C@H](O)[C@@H](CNC(N)=O)O3)[C@@H]2O)O[C@@H]1CO	2.58179	100	21.9669
Topiramate	18.8468	362.091	362.088	C12H21NO8S	Dioxolopyrans	KJADKKWYZYXHBB-XBWDGYHZSA-N	[C@H]12[C@H]([C@H]3[C@](OC1)(COS(N)(=O)=O)OC(O3)(C)C)OC(O2)(C)C	8.53384	99.8	102.142
triacanthine	19.165	204.131	204.13	C10H13N5	6-aminopurines	BEPGTHDUUROBHM-UHFFFAOYSA-N	N1=CN=C2C1=C(N=CN2CC=C(C)C)N	6.36849	100	437.672
Triacylglycerol 14:0-16:1-18:1	19.1394	820.749	820.739	C51H94O6	Triacylglycerols	ZZJWOZRTELCMHU-BGAWVSDISA-N	C(C=CCCC(=O)OC(COC(CCC=CCCCCCCCCCCCCC)=O)COC(=O)CCCCCCCCCCCCC)CCCCCCCCCC	12.0745	98.1	20.0434
TRIGONELLINE	16.1656	160.037	160.037	C7H7NO2	Alkaloids and derivatives	WWNNZCOKKKDOPX-UHFFFAOYSA-N	C[N+]1=CC(=CC=C1)C([O-])=O	3.74914	100	107.232
Trimethylamine?N-oxide	22.3173	76.0742	76.0757	C3H9NO	Trialkyl amine oxides	UYPYRKYUKCHHIB-UHFFFAOYSA-N	O=N(C)(C)C	19.06	100	348.656
Troxerutin	19.18	765.223	765.222	C33H42O19	Flavonoid-3-O-glycosides	IYVFNTXFRYQLRP-NWOIDTSESA-N	O=C1C(OC2OC(COC3OC(C)C(O)C(O)C3O)C(O)C(O)C2O)=C(OC4=CC(OCCO)=CC(O)=C14)C=5C=CC(OCCO)=C(OCCO)C5	1.85567	100	21.9001
Tyramine; PlaSMA ID-59	8.09155	121.064	121.064	C8H11NO	Amino acids	DZGWFCGJZKJUFP-UHFFFAOYSA-N	OC1=CC=C(C=C1)CCN	6.60805	100	32.1012
Uracil; CE0; ISAKRJDGNUQOIC-UHFFFAOYSA-N	7.70482	113.035	113.035	C4H4N2O2	Pyrimidones	ISAKRJDGNUQOIC-UHFFFAOYSA-N	c1cnc(nc1O)O	2.21171	100	25.4975
Valactamide C putative	4.43973	467.386	467.384	C27H50N2O4	Cyclic depsipeptides	LONBSPWPPNYRFU-UHFFFAOYSA-N	CC(C(NC1=O)C(NC(C(OC(CCC(C)CC(C)CC(C)CC1C)C)=O)C(C)CC)=O)C	3.55168	99.9	31.2996
Valine conjugated cholic acid	12.4531	472.343	472.342	C29H49NO6	Glycinated bile acids and derivatives	WVFDPCYTNIXGHI-YDGIAAFJSA-N	C[C@H](CCC(N[C@@H](C(C)C)C(O)=O)=O)[C@H]1CC[C@@]2([H])[C@]3([H])[C@H](O)C[C@]4([H])C[C@H](O)CC[C@]4(C)[C@H]3C[C@H](O)[C@@]21C	2.26531	100	21.4135
Vanillin	10.0765	153.058	153.06	C8H8O3	Methoxyphenols	MWOOGOJBHIARFG-UHFFFAOYSA-N	O=CC1=CC=C(O)C(OC)=C1	15.6801	99.9	21.1014
Verrucarin A-16-oic acid (9CI)_120089	8.4066	533.209	533.202	C27H32O11	Trichothecenes	UKQUNUSSEKGBDS-CSRHXWDSSA-N	OC(C1=CC2C(C3(C)C4(CO4)C(CC3OC(/C=C\C=C\5)=O)O2)(COC(C(C(C)CCOC5=O)O)=O)CC1)=O	13.0907	99	43.6286
Vinyl Carbamate	16.5148	88.0397	88.0393	C3H5NO2	Carbamate esters	LVLANIHJQRZTPY-UHFFFAOYSA-N	N=C(O)OC=C	4.54342	100	23.5398
Yersiniabactin	11.6801	482.122	482.124	C21H27N3O4S3	Alpha amino acids and derivatives	JHYVWAMMAMCUIR-VQNLDRKJSA-N	CC1(CSC(=N1)C(C)(C)C(C2CSC(N2)C3CSC(=N3)C4=CC=CC=C4O)O)C(=O)O	2.61344	100	41.1985
Zingerone	16.8491	217.081	217.08	C11H14O3	Methoxyphenols	OJYLAHXKWMRDGS-UHFFFAOYSA-N	O=C(C)CCC1=CC=C(O)C(OC)=C1	2.3033	100	21.5113
