# Supplementary material for: Untargeted mass spectrometry to investigate ocean acidification in Cancer borealis using optimized metabolite extraction methods
Source: Royal Society of Chemistry journal article supplement (doi:10.1039/d5an00788g), 2026-01-01
Supplement: d5an00788g6.xlsx [file d5an00788g6.xlsx]

## Sheet: IPA OA
Table S5. The complete list of detected metabolites in IPA OA 4 hours group.
Title	RT (min)	Precursor m/z	Reference m/z	Formula	Ontology	InChIKey	SMILES	mass error	Total score	S/N
(2R,3R)-3,5,7-trihydroxy-2-(3,4,5-trihydroxyphenyl)chroman-4-one	9.05183	321.059	321.06	C15H12O8	Epigallocatechins	KJXSIXMJHKAJOD-LSDHHAIUSA-N	O=C1C=2C(O)=CC(O)=CC2OC(C3=CC(O)=C(O)C(O)=C3)C1O	4.36056	69.4	15.2818
(2R,3R,4S,5S,6R)-2-(((6aS,7aR,9aR)-12-ethoxy-3,3,9a,11,14a-pentamethyl-4-(((2S,3R,4S,5R)-3,4,5-trihydroxytetrahydro-2H-pyran-2-yl)oxy)octadecahydro-1H-cyclopropa[1',8a']naphtho[2',1':4,5]indeno[2,1-b]pyran-1-yl)oxy)-6-(hydroxymethyl)tetrahydro-2H-pyra...	16.6679	763.418	763.42	C39H64O13	Terpene glycosides	RDRPORVAKXEYRR-YQTNOESZSA-N	OCC1OC(OC2CC3C(C)(C)C(OC4OCC(O)C(O)C4O)CCC53CC65CCC7(C)C8CC(C)C(OCC)OC8CC7(C)C26)C(O)C(O)C1O	2.33161	61.8	6.90764
(2S,4aS,6aS,6bR,12aS,14bR)-2,4a,6a,6b,9,9,12a-heptamethyl-10,13-dioxo-1,2,3,4,4a,5,6,6a,6b,7,8,8a,9,10,11,12,12a,12b,13,14b-icosahydropicene-2-carboxylic acid	18.4134	491.306	491.31	C30H44O4	Triterpenoids	QGWDYPREORDRIT-OHHDNCQJSA-N	O=C(O)C1(C)CCC2(C)CCC3(C(=CC(=O)C4C5(C)CCC(=O)C(C)(C)C5CCC43C)C2C1)C	8.54857	54.3	82.508
(3R,5S,17R)-17-hydroxy-10,13-dimethylhexadecahydro-1H-cyclopenta[a]phenanthren-3-aminium chloride	13.8986	328.244	328.24	C19H34ClNO	Androstane steroids	GYQZNNAZXVKYOR-YHGFUEDJSA-N	[Cl-].OC1CCC2C3CCC4CC([NH3+])CCC4(C)C3CCC12C	13.4353	56.2	26.6161
(4R,4aS,6R)-6-isopropenyl-4,4a-dimethyl-4,4a,5,6,7,8-hexahydro-2(3H)-naphthalenone	16.3984	241.156	241.16	C15H22O	Eremophilane, 8,9-secoeremophilane and furoeremophilane sesquiterpenoids	WTOYNNBCKUYIKC-JMSVASOKSA-N	O=C1C=C2CCC(C(=C)C)CC2(C)C(C)C1	15.7572	68.6	6.94924
(S)-3-(4-(2-(2-(hydroxymethyl)pyrrolidin-1-yl)-2-oxoethoxy)phenyl)-8-methoxy-2H-chromen-2-one	8.67393	432.147	432.14	C23H23NO6	Isoflav-3-enones	MWAHYWGUPMVQHH-KRWDZBQOSA-N	O=C1OC=2C(OC)=CC=CC2C=C1C=3C=CC(OCC(=O)N4CCCC4CO)=CC3	16.8695	63.5	21.7975
?-Gentiobiose	15.2289	360.146	360.15	C12H22O11	O-glycosyl compounds	DLRVVLDZNNYCBX-CQUJWQHSSA-N	OCC1OC(OCC2OC(O)C(O)C(O)C2O)C(O)C(O)C1O	11.995	81.8	16.0084
?-linolenic acid	4.08993	279.231	279.232	C18H30O2	Lineolic acids and derivatives	DTOSIQBPPRVQHS-PDBXOOCHSA-N	CC/C=C\C/C=C\C/C=C\CCCCCCCC(=O)O	4.44075	67.2	7.04175
[6]-Gingerol	17.9753	317.168	317.17	C17H26O4	Gingerols	NLDDIKRKFXEWBK-AWEZNQCLSA-N	O=C(CCC1=CC=C(O)C(OC)=C1)CC(O)CCCCC	7.91374	50.3	144.595
1,1'-Disulfanediyldiazepan-2-one	15.6374	289.104	289.104	C12H20N2O2S2	Caprolactams	LGBYJXBCVZKJBL-UHFFFAOYSA-N	O=C1CCCCCN1SSN1CCCCCC1=O	0.0691793	50.1	38.8505
1,2-DIDECANOYL-SN-GLYCERO-3-PHOSPHOCHOLINE	13.3494	566.379	566.382	C28H56NO8P	Phosphatidylcholines	MLKLDGSYMHFAOC-AREMUKBSSA-N	CCCCCCCCCC(=O)OC[C@H](COP(=O)([O-])OCC[N+](C)(C)C)OC(=O)CCCCCCCCC	4.50226	85.1	31.5452
1,7,7-trimethylbicyclo[2.2.1]hept-2-yl acetate	22.3751	219.143	219.14	C12H20O2	Bicyclic monoterpenoids	KGEKLUUHTZCSIP-HOSYDEDBSA-N	O=C(OC1CC2CCC1(C)C2(C)C)C	14.6025	73.4	25.8904
1-heptadecanoyl-2-hydroxy-sn-glycero-3-phosphocholine	14.7449	510.353	510.355	C25H52NO7P	1-acyl-sn-glycero-3-phosphocholines	SRRQPVVYXBTRQK-XMMPIXPASA-N	[H][C@@](O)(COC(=O)CCCCCCCCCCCCCCCC)COP([O-])(=O)OCC[N+](C)(C)C	5.50597	66.1	16.7703
1-Monostearin	2.8025	359.315	359.316	C21H42O4	1-monoacylglycerols	VBICKXHEKHSIBG-UHFFFAOYSA-N	O=C(OCC(O)CO)CCCCCCCCCCCCCCCCC	0.222646	52.1	7.37117
1-Oleoyl-sn-glycero-3-phosphocholine	13.4048	522.351	522.355	C26H52NO7P	1-acyl-sn-glycero-3-phosphocholines	YAMUFBLWGFFICM-PTGWMXDISA-N	O=C(OCC(O)COP(=O)([O-])OCC[N+](C)(C)C)CCCCCCCC=CCCCCCCCC	7.67677	68	31.8997
1-Palmitoyl-sn-glycero-3-phosphocholine	13.9179	496.339	496.34	C24H50NO7P	1-acyl-sn-glycero-3-phosphocholines	ASWBNKHCZGQVJV-HSZRJFAPSA-N	O=C(OCC(O)COP(=O)([O-])OCC[N+](C)(C)C)CCCCCCCCCCCCCCC	1.10811	74.5	13.5504
2`-O-Methylguanosine	14.1857	298.11	298.115	C11H15N5O5	Purine nucleosides	OVYNGSFVYRPRCG-KQYNXXCUSA-N	CO[C@@H]1[C@@H]([C@H](O[C@H]1n2cnc3c2nc([nH]c3=O)N)CO)O	15.3968	55.2	12.7187
2-Acetylacteoside	17.611	689.207	689.2	C31H38O16	Coumaric acids and derivatives	ALERZNQPBWWLMW-YVMONPNESA-N	O=C(OC1C(OC(OCCC2=CC=C(O)C(O)=C2)C(OC(=O)C)C1OC3OC(C)C(O)C(O)C3O)CO)C=CC4=CC=C(O)C(O)=C4	10.4324	81.7	73.9571
2-hydroxy-4-(3-(methylthio)propyl)-1-(2-(pyridin-4-yl)-2,3-dihydrobenzo[d]oxazol-6-yl)-1H-imidazol-5(4H)-one	14.6244	385.136	385.13	C19H20N4O3S	Hydantoins	VXGFERCTVPQXGZ-UHFFFAOYSA-N	O=C1N(C(O)=NC1CCCSC)C2=CC=C3NC(OC3=C2)C=4C=CN=CC4	15.8388	69.5	7.47757
2-O-Methyladenosine	10.4132	282.117	282.12	C11H15N5O4	Purine nucleosides	FPUGCISOLXNPPC-UHFFFAOYSA-N	COC1C(O)C(CO)OC1N1C=NC2=C(N)N=CN=C12	8.11712	67.5	21.2769
2'-O-Methylcytidine	10.5585	258.109	258.108	C10H15N3O5	Pyrimidine nucleosides	RFCQJGFZUQFYRF-ZOQUXTDFSA-N	N=C1N=C(O)N(C=C1)C2OC(CO)C(O)C2OC	1.70471	78.2	20.9129
3-(1H-indol-3-ylmethyl)-6,18-dimethyl-12-(1-phenylethyl)-9,15-di(propan-2-yl)-1,4,7,10,13,16,19-heptazacyclotricosane-2,5,8,11,14,17,20-heptone	15.375	773.433	773.434	C41H56N8O7	Hybrid peptides	NZNSTOHSZZLSNP-UHFFFAOYSA-N	OC1=NC(C(O)=NC(C(O)=NC(C(O)=NC(C(O)=NC(C(O)=NC(C(O)=NCCC1)CC2=CNC=3C=CC=CC32)C)C(C)C)C(C=4C=CC=CC4)C)C(C)C)C	1.22829	67.5	6.87479
3',5'-CYCLIC AMP	10.8323	330.06	330.06	C10H12N5O6P	3',5'-cyclic purine nucleotides	IVOMOUWHDPKRLL-KQYNXXCUSA-N	C1[C@@H]2[C@H]([C@H]([C@@H](O2)N3C=NC4=C(N=CN=C43)N)O)OP(=O)(O1)O	0.848331	75.2	32.0495
3-Hydroxy-4-butyrophenetidide	12.6	224.129	224.128	C12H17NO3	Anilides	LIAWQASKBFCRNR-UHFFFAOYSA-N	CCOC1=CC=C(NC(=O)CC(C)O)C=C1	3.0786	60.9	16.712
3-hydroxy-C14 homoserine lactone	3.92505	328.244	328.248	C18H33NO4	N-acyl-alpha amino acids and derivatives	IKQUESGRCDRZTI-UHFFFAOYSA-N	CCCCCCCCCCCC(O)CC(=O)NC1CCOC1=O	11.668	62	84.2602
4-Cholesten-3-one	3.44842	385.347	385.346	C27H44O	Cholesterols and derivatives	NYOXRYYXRWJDKP-GYKMGIIDSA-N	C[C@H](CCCC(C)C)[C@H]1CC[C@@H]2[C@@]1(CC[C@H]3[C@H]2CCC4=CC(=O)CC[C@]34C)C	2.33556	65.4	227.127
4-methyl-8-((2-methylpiperidin-1-ium-1-yl)methyl)-2-oxo-2H-chromen-7-olate	17.9947	310.135	310.14	C17H21NO3	7-hydroxycoumarins	SHCNCWNJFICBJU-UHFFFAOYSA-N	O=C1OC2=C(C=CC([O-])=C2C[NH+]3CCCCC3C)C(=C1)C	15.1867	54.3	38.102
5Alpha-Cholestan-3Beta-Ol-6-One	3.4495	385.347	385.346	C27H46O2	Cholesterols and derivatives	JQMQKOQOLPGBBE-JJMJUPCVSA-N	O=C1CC2C3CCC(C(C)CCCC(C)C)C3(C)CCC2C4(C)CCC(O)CC14	2.33556	61.2	46.2999
7,8-dimethoxy-benzo[d][1,2]oxazin-1-one	14.3469	230.044	230.04	C10H9NO4	Benzoxazines	KPEBLJUVHUTNCC-UHFFFAOYSA-N	O=C1ON=CC=2C=CC(OC)=C(OC)C12	19.1706	61.8	10.8247
7-O-Ethylmorroniside	9.38138	457.176	457.169	C19H30O11	O-glycosyl compounds	IRKFOLIBBQDADK-LEYKIWRXSA-N	O=C(OC)C1=COC(OC2OC(CO)C(O)C(O)C2O)C3C(OC(OCC)CC13)C	16.3834	77.7	29.9292
7-Oxocholesterol	3.48195	401.338	401.341	C27H44O2	Cholesterols and derivatives	YIKKMWSQVKJCOP-ABXCMAEBSA-N	O=C1C=C2CC(O)CCC2(C)C3CCC4(C)C(CCC4C13)C(C)CCCC(C)C	7.97326	61.8	23.92
8-(azepan-1-ium-1-ylmethyl)-3-(4-chlorophenyl)-4-oxo-4H-chromen-7-olate	15.6856	406.127	406.12	C22H22ClNO3	Isoflavones	LUXRPLCOGZWQEC-UHFFFAOYSA-N	O=C1C(=COC=2C1=CC=C([O-])C2C[NH+]3CCCCCC3)C=4C=CC(Cl)=CC4	16.2514	64.7	67.3148
8-acetamido-2-methyl-7-oxononanoic acid	10.6562	266.135	266.136	C12H21NO4	Medium-chain fatty acids	UALLEVOGEQZKSX-UHFFFAOYSA-N	O=C(O)C(C)CCCCC(=O)C(N=C(O)C)C	5.97438	63.6	13.6324
8-Gingerol	17.0768	345.2	345.2	C19H30O4	Gingerols	BCIWKKMTBRYQJU-INIZCTEOSA-N	O=C(CCC1=CC=C(O)C(OC)=C1)CC(O)CCCCCCC	0.0289687	64.7	8.73847
Acetochlor-OXA	10.6523	266.135	266.139	C14H19NO4	Alpha amino acids and derivatives	OTKTUNJJKYTOFF-UHFFFAOYSA-N	CCOCN(C(=O)C(O)=O)C1=C(C)C=CC=C1CC	14.917	57.9	16.255
Adenosine	9.53543	268.105	268.104	C10H13N5O4	Purine nucleosides	OIRDTQYFTABQOQ-KQYNXXCUSA-N	C1=NC(=C2C(=N1)N(C=N2)[C@H]3[C@@H]([C@@H]([C@H](O3)CO)O)O)N	3.24501	84.5	64.1124
Adenosine	9.57308	268.105	268.104	C10H13N5O4	Purine nucleosides	OIRDTQYFTABQOQ-UHFFFAOYSA-N	OCC1OC(N2C=NC=3C(=NC=NC32)N)C(O)C1O	3.24501	75.6	9.63799
Adenosine Monophosphate	17.6355	348.065	348.07	C10H14N5O7P	Purine ribonucleoside monophosphates	UDMBCSSLTHHNCD-KQYNXXCUSA-N	O=P(O)(O)OCC1OC(N2C=NC=3C(=NC=NC32)N)C(O)C1O	14.8533	80.9	12.0081
Alloimperatorin	12.1741	271.088	271.09	C16H14O4	8-hydroxypsoralens	KDXVVZMYSLWJMA-UHFFFAOYSA-N	O=C1OC=2C(O)=C3OC=CC3=C(C2C=C1)CC=C(C)C	6.63986	52.2	25.4103
Alpha Cyperone	17.6897	241.151	241.15	C15H22O	Eudesmane, isoeudesmane or cycloeudesmane sesquiterpenoids	KUFXJZXMWHNCEH-DOMZBBRYSA-N	O=C1C(=C2CC(C(=C)C)CCC2(C)CC1)C	3.35891	62.2	24.4507
alpha-Cyclopiazonic acid	21.8197	337.16	337.155	C20H20N2O3	3-alkylindoles	SZINUGQCTHLQAZ-DQYPLSBCSA-N	CC(=O)C1=C([C@@H]2[C@@H]3[C@@H](CC4=C5C3=CNC5=CC=C4)C(N2C1=O)(C)C)O	15.2452	60.5	6.03095
Arctigenin	18.9498	373.157	373.16	C21H24O6	Dibenzylbutyrolactone lignans	NQWVSMVXKMHKTF-JKSUJKDBSA-N	O=C1OCC(CC2=CC=C(OC)C(OC)=C2)C1CC3=CC=C(O)C(OC)=C3	9.11137	56.5	22.5006
Benzalkonium chloride (C12)	11.9864	304.296	304.3	[C21H38N]+	Phenylmethylamines	CYDRXTMLKJDRQH-UHFFFAOYSA-N	C[N+](CCCCCCCCCCCC)(Cc1ccccc1)C	13.0463	61.3	33.7013
Bisphenol A bis(3-chloro-2-hydroxypropyl) ether	3.31532	430.156	430.155	C21H26Cl2O4	Diphenylmethanes	PTCFDJRJOGPUFE-UHFFFAOYSA-N	CC(C)(C1=CC=C(C=C1)OCC(CCl)O)C2=CC=C(C=C2)OCC(CCl)O	4.1148	67.2	8.75715
Butyryl carnitine (isomer of 920)	18.7886	232.152	232.154	C11H21NO4	Acyl carnitines	LRCNOZRCYBNMEP-UHFFFAOYSA-N	O=C([O-])CC(OC(=O)C(C)C)C[N+](C)(C)C	11.7594	75.1	50.893
Calycanthine	17.2975	369.201	369.2	C22H26N4	Aminoquinolines and derivatives	XSYCDVWYEVUDKQ-LIKPIUCQSA-N	C=1C=CC2=C(C1)NC3N(C)CCC24C5NC=6C=CC=CC6C34CCN5C	2.68147	61.1	78.3226
Cephaeline	10.46	489.275	489.27	C28H38N2O4	Emetine alkaloids	DTGZHCFJNDAHEN-UHFFFAOYSA-N	OC=1C=C2C(=CC1OC)C(NCC2)CC3CC4C5=CC(OC)=C(OC)C=C5CCN4CC3CC	10.4441	61.9	26.1818
Cholesterol	3.08607	369.348	369.352	C27H46O	Cholesterols and derivatives	HVYWMOMLDIMFJA-LBHVWCRMSA-N	CC(C4)(C(CC(O)C4)=3)C(C2)C(CC3)C(C1)C(C)(C2)C(C(C)CCCC(C)C)C1	9.90926	67	43.3964
Citicoline	19.0398	489.114	489.115	C14H26N4O11P2	Pyrimidine ribonucleoside diphosphates	RZZPDXZPRHQOCG-UHFFFAOYSA-N	C[N+](C)(C)CCOP([O-])(=O)OP(O)(=O)OCC1OC(C(O)C1O)N1C=CC(N)=NC1=O	1.81961	85.3	31.9469
Clozapine	11.9766	327.137	327.137	C18H19ClN4	Dibenzodiazepines	QZUDBNBUXVUHMW-UHFFFAOYSA-N	C1(=Nc2c(Nc3c1cccc3)ccc(c2)Cl)N1CCN(CC1)C	1.16159	55	21.8187
cordycepin	10.1524	252.105	252.109	C10H13N5O3	Purine 3'-deoxyribonucleosides	OFEZSBMBBKLLBJ-BAJZRUMYSA-N	OCC1OC(N2C=NC=3C(=NC=NC32)N)C(O)C1	15.1522	65.5	11.0296
Cytidine	13.2612	244.089	244.093	C9H13N3O5	Pyrimidine nucleosides	UHDGCWIWMRVCDJ-UHFFFAOYSA-N	C1=CN(C(=O)N=C1N)C2C(C(C(O2)CO)O)O	15.1582	61.2	18.593
Cytidine-5'-diphosphocholine sodium salt dihydrate, from yeast, solid	19.0572	489.114	489.115	C14H26N4O11P2	Pyrimidine ribonucleoside diphosphates	RZZPDXZPRHQOCG-OJAKKHQRSA-N	C[N+](C)(C)CCOP(=O)([O-])OP(=O)(O)OCC1C(C(C(O1)N2C=CC(=NC2=O)N)O)O	1.81961	77.4	18.3017
Decanoyl-L-Carnitine	14.0636	316.246	316.248	C17H33NO4	Acyl carnitines	LZOSYCMHQXPBFU-UHFFFAOYSA-N	CCCCCCCCCC(=O)OC(CC(=O)[O-])C[N+](C)(C)C	6.1028	70.9	27.7487
deltamine	16.581	488.261	488.26	C25H39NO7	Aconitane-type diterpenoid alkaloids	GLMFFCVWRKKBJB-YVAUPFRZSA-N	OC1C2C3(C)CN(CC)C4C51OCOC65CC(OC)C7CC(O)(C6C7OC)C42C(OC)CC3	2.64203	66.4	7.31824
Denatonium_TP222	13.9012	222.147	222.149	[C13H20NO2]+	Alpha amino acids	FCPJMWRSLGIKTQ-UHFFFAOYSA-O	CC[N+](CC)(CC(O)=O)CC1=CC=CC=C1	10.5785	54	9.71554
Dethiobiotin	19.8467	215.14	215.139	C10H18N2O3	Medium-chain fatty acids	AUTOLBMXDDTRRT-JGVFFNPUSA-N	OC(=O)CCCCCC(N1)C(C)NC(=O)1	4.55519	55.7	5.90028
Dibucaine	7.71767	344.239	344.233	C20H29N3O2	Quinolones and derivatives	PUFQVTATUTYEAL-UHFFFAOYSA-N	CCCCOC1=NC2=CC=CC=C2C(=C1)C(=O)NCCN(CC)CC	16.4133	61.1	10.208
dioctylamine	12.179	242.285	242.284	C16H35N	Dialkylamines	LAWOZCWGWDVVSG-UHFFFAOYSA-N	N(CCCCCCCC)CCCCCCCC	3.59082	57.4	367.682
Etomidate	13.669	245.132	245.128	C14H16N2O2	Carbonylimidazoles	NPUKDXXFDDZOKR-LLVKDONJSA-N	O=C(OCC)C1=CN=CN1C(C=2C=CC=CC2)C	15.7061	63.2	18.733
Gallocatechin	18.991	329.057	329.06	C15H14O7	Epigallocatechins	XMOCLSLCDHWDHP-SWLSCSKDSA-N	OC=1C=C(O)C2=C(OC(C3=CC(O)=C(O)C(O)=C3)C(O)C2)C1	9.72467	53.1	186.754
Ganciclovir	10.9239	256.103	256.104	C9H13N5O4	Hypoxanthines	IRSCQMHQWWYFCW-UHFFFAOYSA-N	OCC(CO)OCn(c2)c(N=1)c(n2)C(=O)NC(N)1	2.06947	59.2	7.4151
Glu-Gln	16.8348	276.116	276.119	C10H17N3O6	Dipeptides	MGHKSHCBDXNTHX-UHFFFAOYSA-N	O=C(O)CCC(N)C(O)=NC(C(=O)O)CCC(=N)O	10.213	59.4	17.8488
Glycerophosphocholine	21.0744	258.109	258.11	C8H20NO6P	Glycerophosphocholines	SUHOQUVVVLNYQR-MRVPVSSYSA-N	C[N+](C)(C)CCOP(=O)([O-])OC[C@@H](CO)O	4.68792	87.3	42.3746
GUANOSINE	11.3293	284.099	284.099	C10H13N5O5	Purine nucleosides	NYHBQMYGNKIUIF-UUOKFMHZSA-N	C1=NC2=C(N1[C@H]3[C@@H]([C@@H]([C@H](O3)CO)O)O)NC(=NC2=O)N	0.140796	92.4	62.7878
Helenine	18.4176	255.131	255.13	C15H20O2	Eudesmanolides, secoeudesmanolides, and derivatives	PXOYOCNNSUAQNS-AGNJHWRGSA-N	O=C1OC2CC3(C(=CC2C1=C)C(C)CCC3)C	5.87936	56.2	12.9792
Hexanoyl-L-Carnitine	16.6264	260.184	260.186	C13H25NO4	Acyl carnitines	VVPRQWTYSNDTEA-LLVKDONJSA-N	CCCCCC(=O)O[C@H](CC(=O)[O-])C[N+](C)(C)C	7.45621	67.8	9.97791
hydroquinidine	7.41617	344.239	344.233	C20H26N2O2	Cinchona alkaloids	LJOQGZACKSYWCH-LHHVKLHASA-N	OC(C=1C=CN=C2C=CC(OC)=CC21)C3N4CCC(C3)C(C4)CC	16.4133	54	49.9682
Inosine	10.6065	269.084	269.088	C10H12N4O5	Purine nucleosides	UGQMRVRMYYASKQ-KQYNXXCUSA-N	OC[C@@H](O1)[C@@H](O)[C@@H](O)[C@@H]1n(c3)c(N=2)c(n3)C(=O)NC2	14.2704	88.6	5.28624
Ipecoside	14.6178	588.188	588.2	C27H35NO12	Terpene glycosides	QISXROCIXKXUPS-MBXIADDMSA-N	O=C(OC)C1=COC(OC2OC(CO)C(O)C(O)C2O)C(C=C)C1CC3C4=CC(O)=C(O)C=C4CCN3C(=O)C	19.5682	63.5	7.18532
Koninginin E	7.43675	283.186	283.19	C16H26O4	Benzopyrans	INHVGPIPHZJQOP-ZNMIVQPWSA-N	CCCCCC[C@@H]([C@@H]1CCC2=C(O1)[C@@H](CCC2=O)O)O	14.831	64	13.8403
Lauramidopropyl betaine	12.2215	343.292	343.296	[C19H39N2O3]+	Alpha amino acids	MRUAUOIMASANKQ-UHFFFAOYSA-O	CCCCCCCCCCCC(=O)NCCC[N+](C)(C)CC(O)=O	9.99139	91.6	26.6203
Laurocapram	3.64395	282.281	282.279	C18H35NO	Caprolactams	AXTGDCSMTYGJND-UHFFFAOYSA-N	CCCCCCCCCCCCN1CCCCCC1=O	5.8807	55.2	1061.68
Linoleic acid	7.19248	281.243	281.248	C18H32O2	Lineolic acids and derivatives	OYHQOLUKZRVURQ-HZJYTTRNSA-N	CCCCC/C=C\C/C=C\CCCCCCCC(=O)O	16.7113	73.3	71.395
Melezitose	16.4169	527.158	527.158	C18H32O16	Oligosaccharides	QWIZNVHXZXRPDR-WSCXOGSTSA-N	OCC1OC(OC2C(O)C(OC2(OC3OC(CO)C(O)C(O)C3O)CO)CO)C(O)C(O)C1O	0.303514	83.3	83.4895
Methylophiopogonanone A	15.2289	365.101	365.1	C19H18O6	Homoisoflavanones	BXTNNJIQILYHJB-GFCCVEGCSA-N	O=C1C=2C(O)=C(C(O)=C(C2OCC1CC3=CC=C4OCOC4=C3)C)C	1.616	56.1	11.1588
mollugin	11.3488	307.096	307.1	C17H16O4	Naphthopyrans	VLGATXOTCNBWIT-UHFFFAOYSA-N	O=C(OC)C=1C(O)=C2C=CC=CC2=C3OC(C=CC31)(C)C	13.0576	67.1	64.6293
Mulberroside C	9.49937	459.154	459.16	C24H26O9	2-arylbenzofuran flavonoids	OHVJCFZJKPEJRL-BOWLQXBNSA-N	OC=1C=C(OC2OCC(O)C(O)C2O)C=C(C1)C=3OC=4C=C5OC(C)(C)C(O)CC5=CC4C3	12.1962	70.5	29.3089
N-(3,4-dimethoxyphenethyl)-1H-indole-3-carboxamide	10.1479	325.161	325.16	C19H20N2O3	Dimethoxybenzenes	ODKYLYWWBHXMRV-UHFFFAOYSA-N	O=C(NCCC1=CC=C(OC)C(OC)=C1)C2=CNC=3C=CC=CC32	3.99803	56.3	9.39583
N-(6-methoxypyridin-3-yl)-1-methyl-1H-indole-6-carboxamide	17.2023	282.117	282.12	C16H15N3O2	Indolecarboxamides and derivatives	IEYPTSQYHVVDAC-UHFFFAOYSA-N	O=C(NC1=CN=C(OC)C=C1)C=2C=CC=3C=CN(C3C2)C	9.21594	67.7	6.98844
N-Benzyladenine	13.2442	226.104	226.109	C12H11N5	6-alkylaminopurines	NWBJYWHLCVSVIJ-UHFFFAOYSA-N	C(NC1=C2N=CN=C2N=CN1)C1=CC=CC=C1	19.5481	74.3	12.919
N-Carbobenzyloxyleucine	10.7914	266.135	266.139	C14H19NO4	Leucine and derivatives	USPFMEKVPDBMCG-LBPRGKRZSA-N	O=C(O)C(N=C(O)OCC=1C=CC=CC1)CC(C)C	14.917	56.1	19.9233
NCGC00347704-02_C24H32O7_2H-Oxireno[1,10a]phenanthro[3,2-b]furan-10(11bH)-one, 5,7-bis(acetyloxy)-3,3a,4,5,6,7,7a,7b,8,8a-decahydro-4,4,7a,11-tetramethyl-, (1aS,3aR,5S,7S,7aR,7bS,8aR,11bR)-	2.4138	415.208	415.212	C24H32O7	Naphthofurans	YOELDOOOBJSHSZ-SRFZOMHBSA-N	CC(=O)O[C@H]1C[C@H](OC(C)=O)[C@]2(C)[C@H](CC[C@@]34O[C@@H]3C/5=C(C)/C(=O)O[C@@H]5C[C@@H]24)C1(C)C	7.99592	70.2	11.7142
NCGC00380138-01!	13.669	210.11	210.112	C11H15NO3	Oxazolidinones	UZQNZIRCZJBHKR-UHFFFAOYSA-N	CCC1C(O)C2OC(=O)N3CCC=C1C23	12.2315	64.1	7.27795
NCGC00385962-01_C16H24O3_	19.6595	247.165	247.169	C16H24O3	Macrolides and analogues	IKJZVOVTPXBUBG-QVWJMUBJSA-N	CC1C\C=C\C=C/CCCCC(O)C\C=C\C(=O)O1	15.981	79.5	10.6404
Octanoyl-L-Carnitine	15.0469	288.213	288.217	C15H29NO4	Acyl carnitines	CXTATJFJDMJMIY-CYBMUJFWSA-N	CCCCCCCC(=O)O[C@H](CC(=O)[O-])C[N+](C)(C)C	15.0928	70.3	8.38805
Oleoyl-L-Carnitine	12.6342	426.353	426.358	C25H47NO4	Acyl carnitines	IPOLTUVFXFHAHI-WHIOSMTNSA-N	CCCCCCCC/C=C\CCCCCCCC(=O)O[C@H](CC(=O)[O-])C[N+](C)(C)C	10.5311	66.2	64.2094
Ovalitenin B	15.1779	311.127	311.128	C19H18O4	Butyrophenones	AADNEQWIZKTMBL-UHFFFAOYSA-N	O=C(C1=CC=C2OC=CC2=C1OC)CC(OC)C=3C=CC=CC3	1.86419	55.7	5.17474
Palmitoylcarnitine	12.3394	400.337	400.342	C23H45NO4	Acyl carnitines	XOMRRQXKHMYMOC-NRFANRHFSA-N	O=C([O-])CC(OC(=O)CCCCCCCCCCCCCCC)C[N+](C)(C)C	13.8132	56.2	43.684
Palmitoyl-L-Carnitine	12.3438	400.344	400.342	C23H45NO4	Acyl carnitines	XOMRRQXKHMYMOC-OAQYLSRUSA-N	CCCCCCCCCCCCCCCC(=O)O[C@H](CC(=O)[O-])C[N+](C)(C)C	3.67186	55.9	86.6528
PC(16:0/0:0)	13.9829	496.339	496.34	C24H50NO7P	1-acyl-sn-glycero-3-phosphocholines	ASWBNKHCZGQVJV-UHFFFAOYSA-N	CCCCCCCCCCCCCCCC(=O)OCC(O)COP([O-])(=O)OCC[N+](C)(C)C	1.10811	79.3	70.3868
Peimine	14.5872	454.329	454.33	C27H45NO3	Cerveratrum-type alkaloids	IUKLSMSEHKDIIP-BZMYINFQSA-N	OC1CCC2(C)C(C1)C(O)CC3C4CCC5C(CN6CC(C)CCC6C5(O)C)C4CC32	3.05945	56.7	25.0699
Pentaethylene glycol	9.78403	239.148	239.149	C10H22O6	Polyethylene glycols	JLFNLZLINWHATN-UHFFFAOYSA-N	OCCOCCOCCOCCOCCO	3.38701	55.6	13.2644
Pesticide2_Aldicarb sulfone_C7H14N2O4S_Propanal, 2-methyl-2-(methylsulfonyl)-, O-[(methylamino)carbonyl]oxime, (1E)-	19.6498	240.1	240.101	C7H14N2O4S	Sulfones	YRRKLBAKDXSTNC-WEVVVXLNSA-N	CC(C)(C=NOC(=O)NC)S(=O)(=O)C	5.24779	58.5	6.70149
Phenmedipham	9.8549	301.117	301.118	C16H16N2O4	Phenylcarbamic acid esters	IDOWTHOLJBTAFI-UHFFFAOYSA-N	c1c(OC(Nc2cc(ccc2)C)=O)cccc1NC(OC)=O	5.61241	61.9	126.563
Phenylalanylisoleucine (isomer of 1329)	13.5376	279.167	279.17	C15H22N2O3	Dipeptides	JWBLQDDHSDGEGR-UHFFFAOYSA-N	O=C(O)C(NC(=O)C(N)CC1=CC=CC=C1)C(C)CC	12.967	53.7	37.5323
Propionylcarnitine	19.5754	218.136	218.139	C10H19NO4	Acyl carnitines	UFAHZIUFPNSHSL-UHFFFAOYSA-N	O=C([O-])CC(OC(=O)CC)C[N+](C)(C)C	10.4979	75.7	90.3889
Rehmannioside A	2.32732	547.157	547.16	C21H32O15	O-glycosyl compounds	DTNSOISBYQKHCS-PHLAQERCSA-N	OCC1OC(OCC2OC(OC3OC=CC4C(O)C5OC5(CO)C34)C(O)C(O)C2O)C(O)C(O)C1O	4.87974	55.4	5.50927
Riboflavin	9.44863	377.147	377.146	C17H20N4O6	Flavins	AUNGANRZJHBGPY-UHFFFAOYSA-N	CC1=CC2=C(C=C1C)N(C3=NC(=O)NC(=O)C3=N2)CC(C(C(CO)O)O)O	2.99619	77.1	50.1943
Seconeokadsuranic acid A	18.3754	491.306	491.31	C30H44O4	Diterpenoids	GXLUGCOZQDLXAJ-KEBDBYFISA-N	O=C(O)C(=CCCC(C)C1C(=C)C2C=C3C(CCC(C(=C)C)C3(C)CCC(=O)O)C2(C)CC1)C	8.54857	55.9	155.124
sodium (2R)-2-((2R,5S,6R)-6-((3E,5E)-6-((3aR,4S,7aS)-4-(1H-pyrrole-2-carbonyl)-2,3,3a,4,5,7a-hexahydro-1H-inden-5-yl)hexa-3,5-dien-3-yl)-5-methyltetrahydro-2H-pyran-2-yl)butanoate	11.8002	502.293	502.29	C30H40NNaO4	Aryl alkyl ketones	BPPSGNVGAIGXQI-AREVZEEPSA-M	[Na+].O=C([O-])C(CC)C1OC(C(=CC=CC2C=CC3CCCC3C2C(=O)C4=CC=CN4)CC)C(C)CC1	6.35091	53.7	108.646
TREHALOSE	15.3017	365.101	365.105	C12H22O11	O-glycosyl compounds	HDTRYLNUVZCQOY-LIZSDCNHSA-N	OC[C@H]1O[C@H](O[C@H]2O[C@H](CO)[C@@H](O)[C@H](O)[C@H]2O)[C@H](O)[C@@H](O)[C@@H]1O	13.2564	90.5	66.5775
Triacylglycerol 16:0-16:0-18:0	22.8002	852.798	852.801	C53H102O6	Triacylglycerols	DQKMNCLZNGAXNX-UHFFFAOYSA-N	O=C(CCCCCCCCCCCCCCCCC)OCC(COC(=O)CCCCCCCCCCCCCCC)OC(=O)CCCCCCCCCCCCCCC	3.92823	72	6.82285
Tripalmitin	22.7422	824.768	824.77	C51H98O6	Triacylglycerols	PVNIQBQSYATKKL-UHFFFAOYSA-N	CCCCCCCCCCCCCCCC(=O)OCC(COC(=O)CCCCCCCCCCCCCCC)OC(=O)CCCCCCCCCCCCCCC	2.35217	76.5	16.6184
Triptolide	8.11683	383.141	383.14	C20H24O6	Oxepanes	DFBIRQPKNDILPW-CIVMWXNOSA-N	O=C1OCC2=C1CCC3(C)C2CC4OC45C(O)C6(OC6C7OC753)C(C)C	2.84491	69.2	14.5051
(3R,5S,7R,9S,10S,12S,13R,14S,17R)-17-((2R)-7-hydroxy-6-methylheptan-2-yl)-10,13-dimethylhexadecahydro-1H-cyclopenta[a]phenanthrene-3,7,12-triol	3.22368	419.353	419.352	C27H48O4	Tetrahydroxy bile acids, alcohols and derivatives	XJZGNVBLVFOSKJ-XZULNKEGSA-N	C[C@H](CCCC(C)CO)[C@H]1CC[C@H]2[C@]3([H])[C@H](O)C[C@@H]4C[C@H](O)CC[C@]4(C)[C@H]3C[C@H](O)[C@@]21C	1.2877	100	22.2592
(R)-4-((3S,5S,7R,8R,9S,10S,13R,14S,17R)-3,7-dihydroxy-10,13-dimethylhexadecahydro-1H-cyclopenta[a]phenanthren-17-yl)pentanoic acid	11.5811	785.587	785.593	C24H40O4	Dihydroxy bile acids, alcohols and derivatives	RUDATBOHQWOJDD-JGFDLHJZSA-N	[H][C@@]12[C@H](O)C[C@]3([H])C[C@@H](O)CC[C@]3(C)[C@H]1CC[C@@]4(C)[C@H]2CC[C@@H]4[C@@H](CCC(O)=O)C	7.62482	99.3	147.096
(R)-4-((3S,5S,8R,9S,10S,13R,14S,17R)-3-hydroxy-10,13-dimethylhexadecahydro-1H-cyclopenta[a]phenanthren-17-yl)pentanoic acid	11.6191	775.599	775.585	C24H40O3	Monohydroxy bile acids, alcohols and derivatives	SMEROWZSTRWXGI-XBESLWPFSA-N	C[C@@H]([C@H]1CC[C@]2([H])[C@]1(C)CC[C@@]3([H])[C@@]2([H])CC[C@]4([H])[C@]3(C)CC[C@H](O)C4)CCC(O)=O	18.5409	95.9	174.511
(R)-4-((8S,9S,10R,13R,14S,17R)-10,13-dimethyl-3-oxo-2,3,6,7,8,9,10,11,12,13,14,15,16,17-tetradecahydro-1H-cyclopenta[a]phenanthren-17-yl)pentanoic acid	10.485	395.258	395.256	C24H36O3	Bile acids, alcohols and derivatives	WCFIGQHNBJXROP-IHMUCKAYSA-N	C[C@@H]([C@H]1CC[C@]2([H])[C@]1(C)CC[C@@]3([H])[C@@]2([H])CCC([C@]3(C)CC4)=CC4=O)CCC(O)=O	5.36362	99.9	20.0325
1,2-Dioleoyl-rac-glycerol	3.11062	638.571	638.572	C39H72O5	1,2-diacylglycerols	AFSHUZFNMVJNKX-LLWMBOQKSA-N	O=C(OCC(OC(=O)CCCCCCCC=CCCCCCCCC)CO)CCCCCCCC=CCCCCCCCC	1.37808	100	37.5758
CYTIDINE 2',3'-CYCLIC PHOSPHATE	7.35503	328.03	328.031	C9H12N3O7P	2',3'-cyclic pyrimidine nucleotides	NMPZCCZXCOMSDQ-ZRTZXPPTSA-N	NC1=NC(=O)N(C=C1)C1O[C@H](CO)[C@H]2OP(O)(=O)O[C@@H]12	0.36582	100	27.8102
methyl (4R)-4-((5R,9S,10S,12S,13R,17R)-12-hydroxy-10,13-dimethyl-2,5,6,7,8,9,10,11,12,13,14,15,16,17-tetradecahydro-1H-cyclopenta[a]phenanthren-17-yl)pentanoate	11.5414	799.592	799.585	C25H40O3	Monohydroxy bile acids, alcohols and derivatives	HDXFKPPIKDSQGU-HFCBJCDPSA-N	[H][C@@]12CC[C@]3([H])C=CCC[C@]3(C)[C@H]1C[C@H](O)[C@@]4(C)[C@]2(CC[C@@H]4[C@@H](CCC(OC)=O)C)[H]	9.10473	99	35.7483
methyl (4R,E)-4-((3R,5S,7S,9S,10S,13R,14S,17R)-3,7-dihydroxy-10,13-dimethylhexadecahydro-1H-cyclopenta[a]phenanthren-17-yl)pent-2-enoate	11.4255	809.584	809.593	C25H40O4	7-alpha-hydroxysteroids	AJOPHDUNANPFKQ-VEEBWJHKSA-N	C[C@H](/C=C/C(OC)=O)[C@H]1CC[C@H]2[C@]([C@@H]3CC[C@@]21C)([H])[C@@H](O)C[C@H]4[C@]3(C)CC[C@@H](O)C4	10.6103	98.5	455.647
N-((4R)-4-((3R,5S,9S,10S,13R,14S,17R)-3-hydroxy-10,13-dimethylhexadecahydro-1H-cyclopenta[a]phenanthren-17-yl)pentanoyl)-N-methylglycine	12.5205	448.343	448.342	C27H45NO4	Glycinated bile acids and derivatives	PPDYNVKBDBQLEM-RMXYKXGFSA-N	[H][C@@]12CC[C@@]3(C[C@H](O)CC[C@]3(C)[C@H]1CC[C@@]4(C)[C@H]2CC[C@@H]4[C@@H](CCC(N(C)CC(O)=O)=O)C)[H]	2.16353	100	25.1254
(1R,2R,4aS,8aS)-1-((S)-3-hydroxy-3-methylpentyl)-2,5,5,8a-tetramethyldecahydronaphthalen-2-ol	7.43327	311.293	311.29	C20H38O2	Diterpenoids	VWPNQCLIQCRCCG-HHUCQEJWSA-N	OC(C)(CC)CCC1C(O)(C)CCC2C(C)(C)CCCC12C	8.32022	99.9	35.3239
(1R,3aR,5aR,5bR,9S,11aR)-3a,5a,5b,8,8,11a-hexamethyl-1-prop-1-en-2-yl-1,2,3,4,5,6,7,7a,9,10,11,11b,12,13,13a,13b-hexadecahydrocyclopenta[a]chrysen-9-ol	4.38538	449.373	449.375	C30H50O	Triterpenoids	MQYXUWHLBZFQQO-KIIHVYTKSA-N	OC1CCC2(C)C(CCC3(C)C2CCC4C5C(C(=C)C)CCC5(C)CCC43C)C1(C)C	4.22809	99.9	21.2308
(1S,2R,5R,6R,10R,13S,15S)-5-[(2R,3E,5R)-5,6-dimethylhept-3-en-2-yl]-6,10-dimethyl-16,17-dioxapentacyclo[13.2.2.0?,?.0?,?.0??,??]nonadec-18-en-13-ol_major	3.18008	446.366	446.363	C28H44O3	Ergostane steroids	VXOZCESVZIRHCJ-LNSUSAKYSA-N	CC(C)C(C)C=CC(C)C1CCC2C1(C)CCC1C23C=CC2(CC(O)CCC12C)OO3	8.10999	99.7	743.961
(2-{[2,3-di(octadecanoyloxy)propyl phosphonato]oxy}ethyl)trimethylazanium	11.7366	790.619	790.632	C44H88NO8P	Phosphatidylcholines	NRJAVPSFFCBXDT-UHFFFAOYSA-N	CCCCCCCCCCCCCCCCCC(=O)OCC(COP(=O)([O-])OCC[N+](C)(C)C)OC(=O)CCCCCCCCCCCCCCCCC	16.4678	96.6	57.974
(2aS,6aS,8aS)-10-(4-acetamido-3-methylbutyl)-6a,8a,9-trimethyl-2,2a,3,4,5,6,6a,6b,7,8,8a,8b,11a,12,12a,12b-hexadecahydro-1H-naphtho[2',1':4,5]indeno[2,1-b]furan-4-yl acetate	13.7263	522.351	522.35	C31H49NO4	Furostanes and derivatives	NNRLQJLRICHBII-FWVIVEMUSA-N	O=C(OC1CCC2(C)C(CCC3C2CCC4(C)C5C(=C(OC5CC34)CCC(C)CNC(=O)C)C)C1)C	2.71848	100	39.9433
(2E)-3-(4-{[(2S,3R,4S,5S,6R)-3-{[(2S,3R,4R)-3,4-dihydroxy-4-(hydroxymethyl)oxolan-2-yl]oxy}-4,5-dihydroxy-6-(hydroxymethyl)oxan-2-yl]oxy}phenyl)-1-(2,4-dihydroxyphenyl)prop-2-en-1-one	8.41072	551.179	551.18	C26H30O13	Flavonoid O-glycosides	VMMVZVPAYFZNBM-KVFWHIKKSA-N	O=C(C=CC1=CC=C(OC2OC(CO)C(O)C(O)C2OC3OCC(O)(CO)C3O)C=C1)C4=CC=C(O)C=C4O	1.79615	100	195.189
(2E,4E)-N-(2-methylpropyl)-6-thiophen-2-ylhexa-2,4-dienamide	7.7176	272.107	272.108	C14H19NOS	N-acyl amines	KNGBXFMEGLRFHV-PRKJJMSOSA-N	OC(=NCC(C)C)C=CC=CCC=1SC=CC1	2.35201	100	36.2868
(2E,4E,8E)-7,13-dihydroxy-4,8,12-trimethyltetradeca-2,4,8-trienoic acid	14.2078	314.229	314.233	C17H28O4	Sesquiterpenoids	RCKDDMWGRIYLCN-WRHFRISWSA-N	O=C(O)C=CC(=CCC(O)C(=CCCC(C)C(O)C)C)C	10.0881	99.8	41.7205
(2R)-6-methylpiperidine-2-carboxylic acid	21.368	144.099	144.1	C7H13NO2	L-alpha-amino acids	IHLDCUQUFBWSJU-PRJDIBJQSA-N	O=C(O)C1NC(C)CCC1	5.6211	100	131.681
(2R,3R,4S,5R,6R)-2-(acetoxymethyl)-6-((3-(benzo[d][1,3]dioxol-5-yl)-6-ethyl-4-oxo-4H-chromen-7-yl)oxy)tetrahydro-2H-pyran-3,4,5-triyl triacetate	7.51868	641.181	641.18	C32H32O14	Isoflavonoid O-glycosides	NDEVARCRJOYXJL-ICLVLUFYSA-N	O=C(OCC1OC(OC2=CC=3OC=C(C(=O)C3C=C2CC)C=4C=CC=5OCOC5C4)C(OC(=O)C)C(OC(=O)C)C1OC(=O)C)C	1.2633	100	20.648
(2R,3R,6R,8R,9S,12S,13R,14R,15R,16R)-6,8,14,15-tetrahydroxy-2,6,13,16-tetramethyl-3-{[(2R,3R,4S,5S,6R)-3,4,5-trihydroxy-6-(hydroxymethyl)oxan-2-yl]oxy}-10-oxatetracyclo[7.6.1.0?,?.0??,??]hexadec-4-en-11-one_major	11.7569	548.271	548.27	C25H38O12	Eudesmanolides, secoeudesmanolides, and derivatives	TYXFVKGQQWDJKA-YFXVJPQZSA-N	CC1C(O)C(O)C2C3(C)C(OC(=O)C13)C(O)C1C(C)(O)C=CC(OC3OC(CO)C(O)C(O)C3O)C12C	1.93335	100	28.4945
(2S,3S,4S,5R,6R)-6-[[(3S,6aR,6bS,8aS,14bR)-8a-carboxy-4,4,6a,6b,11,11,14b-heptamethyl-1,2,3,4a,5,6,7,8,9,10,12,12a,14,14a-tetradecahydropicen-3-yl]oxy]-3,4,5-trihydroxyoxane-2-carboxylic acid_major	12.4588	650.433	650.426	C36H56O9	Triterpene saponins	IUCHKMAZAWJNBJ-DKAZIEIMSA-N	CC1(C)CCC2(C(=O)O)CCC3(C)C(=CCC4C5(C)CCC(OC6OC(C(=O)O)C(O)C(O)C6O)C(C)(C)C5CCC43C)C2C1	10.1933	99.1	22.2417
(3E,7E,11E,15E)-5,9,13,17,18-pentahydroxy-4,6,8,10-tetramethyl-2-[(E)-2-methylbut-2-enyl]nonadeca-3,7,11,15-tetraenedioic acid_major	13.4299	542.325	542.332	C28H44O9	Very long-chain fatty acids	YKAQENKKQWMYFZ-SLELSECNSA-N	CC=C(C)CC(C=C(C)C(O)C(C)C=C(C)C(O)C(C)C=CC(O)CC=CC(O)C(O)C(=O)O)C(=O)O	13.9029	99	71.8273
(3S,10R,13R,17R)-10,13-dimethyl-17-((R)-6-methylheptan-2-yl)-2,3,4,7,8,9,10,11,12,13,14,15,16,17-tetradecahydro-1H-cyclopenta[a]phenanthren-3-yl 2-((4-methyl-6-oxo-7,8,9,10-tetrahydro-6H-benzo[c]chromen-3-yl)oxy)acetate	3.64328	679.438	679.43	C43H60O5	Cholesteryl esters	CGDPLLODVFIMRR-SWPIHIBISA-N	O=C1OC2=C(C=CC(OCC(=O)OC3CC4=CCC5C(CCC6(C)C(CCC56)C(C)CCCC(C)C)C4(C)CC3)=C2C)C7=C1CCCC7	11.3477	98.8	53.4406
(4-oxido-2,3,5,6,7,8-hexahydro-1H-pyrrolizin-4-ium-1-yl)methyl 2,3-dihydroxy-3-methylpentanoate	18.7495	305.206	305.207	C14H25NO5	Pyrrolizidines	QWYNXLBAFAPSKQ-UHFFFAOYSA-N	O=C(OCC1CCN2(=O)CCCC12)C(O)C(O)(C)CC	4.88193	100	38.2872
(5-benzoyloxy-3-chloro-4,6-dihydroxycyclohexen-1-yl)methyl benzoate	10.4024	441.054	441.05	C21H19ClO6	Benzoic acid esters	QUOOWFYEPMIYFF-UHFFFAOYSA-N	O=C(OCC1=CC(Cl)C(O)C(OC(=O)C=2C=CC=CC2)C1O)C=3C=CC=CC3	8.45709	99.7	23.4041
(9S,14S)-10,13-dimethyl-17-(6-methylheptan-2-yl)-2,3,4,7,8,9,10,11,12,13,14,15,16,17-tetradecahydro-1H-cyclopenta[a]phenanthren-3-ol	7.2527	409.332	409.34	C27H46O	Cholesterols and derivatives	HVYWMOMLDIMFJA-GONJIEHTSA-N	OC1CC2=CCC3C(CCC4(C)C(CCC34)C(C)CCCC(C)C)C2(C)CC1	18.5665	98.9	28.1111
(dehydrohexadecanoyl)glycine - Commendamide analogue	4.20193	312.25	312.253	C18H33NO3	N-acyl-alpha amino acids	XPLOWAHHERZGRC-CCEZHUSRSA-N	O=C(C=CCCCCCCCCCCCCC)NCC(=O)O	12.2657	99.7	53.2365
(NAG)(anNAM)-AqKAA[3-NH2-GGGG]	14.9015	588.77	588.773	C47H77N13O22	Polypeptides	NKPYYNVJGCWBCQ-UHFFFAOYSA-N	CC(=O)NC1C(OC2C3COC(O3)C(NC(C)=O)C2OC(C)C(=O)NC(C)C(=O)NC(CCC(=O)NC(CCCCNC(=O)CNC(=O)CNC(=O)CNC(=O)CN)C(=O)NC(C)C(=O)NC(C)C(=O)O)C(N)=O)OC(CO)C(O)C1O	4.382	99.9	41.2069
(NAG)(anNAM)-AqOAG[3-NH2-SD]	20.2884	561.742	561.743	C44H71N11O23	Polypeptides	YUSLJFRGMGOZGO-UHFFFAOYSA-N	CC(=O)NC1C(OC2C3COC(O3)C(NC(C)=O)C2OC(C)C(=O)NC(C)C(=O)NC(CCC(=O)NC(CCCNC(=O)C(CO)NC(=O)C(N)CC(=O)O)C(=O)NC(C)C(=O)NCC(=O)O)C(N)=O)OC(CO)C(O)C1O	2.26082	100	54.4849
(NAG)(DAM)-AelAG	8.43333	529.194	529.198	C40H64N8O23S	Polypeptides	KRBOJXZSNWQLAN-UHFFFAOYSA-N	CC(=O)NC1C(OC2C(COC(C)=O)OC(O)C(NC(C)=O)C2OC(C)C(=O)NC(C)C(=O)NC(CCC(=O)NC(CSCC(N)C(=O)O)C(=O)NC(C)C(=O)NCC(=O)O)C(=O)O)OC(CO)C(O)C1O	6.63268	99.7	33.6559
(NAG)(NAM)-AeKA[3-NH2-GGGG]	19.9683	562.747	562.751	C44H73N11O23	Saccharolipids	CBVBUPRDNNQAES-UHFFFAOYSA-N	CC(=O)NC1C(OC2C(CO)OC(O)C(NC(C)=O)C2OC(C)C(=O)NC(C)C(=O)NC(CCC(=O)NC(CCCCNC(=O)CNC(=O)CNC(=O)CNC(=O)CN)C(=O)NC(C)C(=O)O)C(=O)O)OC(CO)C(O)C1O	7.53441	99.6	45.0476
(NAG)(NAM)-AqKA[3-NH2-GGSGG]	14.7255	605.784	605.775	C47H79N13O24	Polypeptides	VCYLOYMVPCIDQK-UHFFFAOYSA-N	CC(=O)NC1C(OC2C(CO)OC(O)C(NC(C)=O)C2OC(C)C(=O)NC(C)C(=O)NC(CCC(=O)NC(CCCCNC(=O)CNC(=O)CNC(=O)C(CO)NC(=O)CNC(=O)CN)C(=O)NC(C)C(=O)O)C(N)=O)OC(CO)C(O)C1O	14.1472	98.5	20.4049
(R)-4-isopropyl-1,5-dioxo-N-(thiazol-2-yl)-1,2,3,3a,4,5-hexahydropyrrolo[1,2-a]quinazoline-3a-carboxamide	14.6034	371.119	371.12	C18H18N4O3S	Alpha amino acid amides	KZWKYXLDADOEHV-GOSISDBHSA-N	O=C1C=2C=CC=CC2N3C(=O)CCC3(C(=O)NC4=NC=CS4)N1C(C)C	1.88618	100	125.31
(S)-1-carbamoylpyrrolidine-2-carboxylic acid	17.973	159.078	159.08	C6H10N2O3	Proline and derivatives	RTNFBJXLYMERBB-BYPYZUCNSA-N	O=C(N)N1CCCC1C(=O)O	13.8295	99.9	855.59
(S)-4-(((1R,2S,3S,4R,5S)-5-amino-2-(((2S,3R,4S,5S,6R)-4-amino-3,5-dihydroxy-6-(hydroxymethyl)tetrahydro-2H-pyran-2-yl)oxy)-4-(((2R,3R,4S,5S,6R)-6-(ammoniomethyl)-3,4,5-trihydroxytetrahydro-2H-pyran-2-yl)oxy)-3-hydroxycyclohexyl)amino)-3-hydroxy-4-oxob...	12.1272	618.28	618.27	C22H47N5O21S2	4,6-disubstituted 2-deoxystreptamines	FXKSEJFHKVNEFI-FSAGMDOUSA-N	O=C(NC1CC(N)C(OC2OC(C[NH3+])C(O)C(O)C2O)C(O)C1OC3OC(CO)C(O)C(N)C3O)C(O)CC[NH3+].O=S(=O)([O-])O.O=S(=O)([O-])O	16.3036	98	27.0127
(S)-MALATE	10.5328	152.054	152.055	C4H6O5	Beta hydroxy acids and derivatives	BJEPYKJPYRNKOW-REOHCLBHSA-N	C([C@@H](C(=O)O)O)C(=O)O	6.18196	100	51.2285
(Z)-pregna-4,17(20)-diene-3,16-dione	13.9584	335.204	335.2	C21H28O2	Androgens and derivatives	WDXRGPWQVHZTQJ-RHIZAWHPSA-N	O=C1C=C2CCC3C4CC(=O)C(=CC)C4(C)CCC3C2(C)CC1	12.7983	99.6	20.5148
[(1R)-1-[(2S,4aR,4bS,7S,8aS)-7-hydroxy-2,4b,8,8-tetramethyl-4,4a,5,6,7,8a,9,10-octahydro-3H-phenanthren-2-yl]-2-[(2R,3R,4S,5R,6R)-3,4,5-trihydroxy-6-(hydroxymethyl)oxan-2-yl]oxyethyl] acetate_major	13.3148	544.341	544.348	C28H46O9	Diterpene glycosides	ARNXUXYPWUWNPP-RXENORMESA-N	CC(=O)OC(COC1OC(CO)C(O)C(O)C1O)C1(C)C=C2CCC3C(C)(C)C(O)CCC3(C)C2CC1	12.7125	99.2	34.6896
[(2R,4S,5R)-5-ethenyl-1-azabicyclo[2.2.2]octan-2-yl]-(6-methoxyquinolin-4-yl)methanol	7.58642	342.224	342.218	C20H24N2O2	Cinchona alkaloids	LOUPRKONTZGTKE-USWSZDBUSA-N	OC(C=1C=CN=C2C=CC(OC)=CC21)C3N4CCC(C3)C(C=C)C4	19.8996	99.1	27.3705
[(3R,4S,8S,8aS)-3-hydroxy-6,8a-dimethyl-8-[(Z)-2-methylbut-2-enoyl]oxy-3-propan-2-yl-1,2,3a,4,5,8-hexahydroazulen-4-yl] 4-hydroxybenzoate	9.4089	457.258	457.258	C27H36O6	Sesquiterpenoids	NUXKLJINNAOFAH-GLKIMFHVSA-N	O=C(OC1CC(=CC(OC(=O)C(=CC)C)C2(C)CCC(O)(C(C)C)C12)C)C3=CC=C(O)C=C3	0.546737	100	26.7455
[2,3-di(heptadecanoyloxy)propyl] 2-(trimethylazaniumyl)ethyl phosphate	11.6558	762.593	762.601	C42H84NO8P	Phosphatidylcholines	RTWAYAIMWLNAJW-UHFFFAOYSA-N	CCCCCCCCCCCCCCCCC(=O)OCC(COP(=O)([O-])OCC[N+](C)(C)C)OC(=O)CCCCCCCCCCCCCCCC	10.1101	98.8	434.702
[3,4,5-trihydroxy-6-(3,4,5-trihydroxybenzoyl)oxyoxan-2-yl]methyl 3,4,5-trihydroxybenzoate	14.4086	523.042	523.048	C20H20O14	Tannins	LYGRISUQIZNHGM-UHFFFAOYSA-N	O=C(OCC1OC(OC(=O)C2=CC(O)=C(O)C(O)=C2)C(O)C(O)C1O)C3=CC(O)=C(O)C(O)=C3	11.5859	99.3	118.927
[4,5-dihydroxy-3,4-bis(hydroxymethyl)-4a,8,8-trimethyl-5,6,7,8a-tetrahydro-1H-naphthalen-1-yl] hexanoate_84.2%	7.21147	385.259	385.258	C21H36O6	Fatty acid esters	PBKUOHTZGOWWBK-UHFFFAOYSA-N	CCCCCC(=O)OC1C=C(CO)C(O)(CO)C2(C)C(O)CCC(C)(C)C12	0.908481	100	25.5945
[5-chloro-3-[(1E,3E)-3,5-dimethylhepta-1,3-dienyl]-7-methyl-6,8-dioxo-2H-isoquinolin-7-yl] acetate	10.753	412.12	412.129	C21H24ClNO4	Azaphilones	DOUKEKLEUAGITQ-NJHPPEEMSA-N	O=C(OC1(C(=O)C(Cl)=C2C=C(C=CC(=CC(C)CC)C)NC=C2C1=O)C)C	19.6541	98.7	20.27
1-(4-chlorophenyl)isoquinoline	12.3309	240.057	240.057	C15H10ClN	Phenylpyridines	HGJNRQMRLNGOJH-UHFFFAOYSA-N	ClC(C=C1)=CC=C1C2=NC=CC3=CC=CC=C32	2.29112	100	27.218
1-(4-fluorophenyl)isoquinoline	11.1151	224.087	224.087	C15H10FN	Phenylpyridines	JGQQLQAYZXPOJS-UHFFFAOYSA-N	FC(C=C1)=CC=C1C2=NC=CC3=CC=CC=C32	0.847885	100	49.4896
1-(hexadecanoyloxy)-3-hydroxypropan-2-yl-octadec-9-enoate	3.11062	612.549	612.556	C37H70O5	1,2-diacylglycerols	YEJYLHKQOBOSCP-ISLYRVAYSA-N	CCCCCCCCCCCCCCCC(=O)OCC(CO)OC(=O)CCCCCCCC=CCCCCCCCC	11.6724	99.3	36.3967
1,2-Diphenylethanone	12.7271	197.094	197.096	C14H12O	Stilbenes	OTKCEEWUXHVZQI-UHFFFAOYSA-N	O=C(CC1=CC=CC=C1)C1=CC=CC=C1	8.52376	99.9	37.8635
1,4a-dimethyl-9-oxo-7-propan-2-yl-3,4,10,10a-tetrahydro-2H-phenanthrene-1-carboxylic acid	3.97612	332.222	332.222	C20H26O3	Diterpenoids	MSWJSDLNPCSSNW-UHFFFAOYSA-N	O=C(O)C1(C)CCCC2(C3=CC=C(C=C3C(=O)CC12)C(C)C)C	1.26421	100	36.8729
10'-(3-methoxy-4-((1-methyl-1H-imidazol-2-yl)methoxy)phenyl)-9',10'-dihydro-3'H-spiro[cyclohexane-1,2'-pyrano[2,3-f]chromene]-4',8'-dione	11.3488	525.198	525.2	C29H30N2O6	Prenylated neoflavonoids	VTNHVQOONVRIJY-UHFFFAOYSA-N	O=C1OC2=CC=C3C(=O)CC4(OC3=C2C(C5=CC=C(OCC6=NC=CN6C)C(OC)=C5)C1)CCCCC4	4.20792	99.9	21.1877
10-Gingerol	9.89895	373.23	373.23	C21H34O4	Gingerols	AIULWNKTYPZYAN-SFHVURJKSA-N	O=C(CCC1=CC=C(O)C(OC)=C1)CC(O)CCCCCCCCC	1.04493	100	24.0971
10-HYDROXYDECANOATE	7.37568	153.127	153.127	C10H20O3	Medium-chain hydroxy acids and derivatives	YJCJVMMDTBEITC-UHFFFAOYSA-N	C(CCCCC(=O)O)CCCCO	0.653051	100	20.4701
13-(acetyloxy)-1,6-dihydroxy-8-(hydroxymethyl)-4,12,12,15-tetramethyl-5-oxotetracyclo[8.5.0.0?,?.0??,??]pentadeca-3,8-dien-14-yl (2E)-2-methylbut-2-enoate	8.41072	527.198	527.204	C27H36O8	Phorbol esters	PCASZNXKLGTEGB-MDWZMJQESA-N	O=C(OC1C(C)C2(O)C(C=C(CO)CC3(O)C(=O)C(=CC32)C)C4C1(OC(=O)C)C4(C)C)C(=CC)C	11.874	99.3	33.1508
1COOH-2But-A7EO1	20.1983	205.144	205.143	C10H20O4	Medium-chain fatty acids	CEHZMLXJTDNURC-UHFFFAOYSA-N	OCCOCC(CCCC)CC(=O)O	3.75347	100	21.6002
1-Dodecyl-2-pyrrolidinone	4.06803	254.244	254.248	C16H31NO	N-alkylpyrrolidines	NJPQAIBZIHNJDO-UHFFFAOYSA-N	CCCCCCCCCCCCN1CCCC1=O	13.5694	99.8	32.4058
1-Pentanone, 3-hydroxy-1,5-diphenyl-	18.4213	277.116	277.12	C17H18O2	Alkyl-phenylketones	QJUWGGININGVSC-UHFFFAOYSA-N	O=C(C=1C=CC=CC1)CC(O)CCC=2C=CC=CC2	14.795	99.7	57.7438
1-PHENYLETHANOL	2.38715	123.079	123.08	C8H10O	Benzene and substituted derivatives	WAPNOHKVXSQRPX-UHFFFAOYSA-N	CC(O)C1=CC=CC=C1	8.44976	100	22.7273
2-(2,4-dioxo-3,4-dihydropyrimidin-1(2H)-yl)acetic acid	7.11307	171.037	171.04	C6H6N2O4	Alpha amino acids and derivatives	ZFNQFXDDQAEAFI-UHFFFAOYSA-N	O=C1C=CN(C(=O)N1)CC(=O)O	16.312	99.8	20.2876
2-(3-(8-hydroxyoctyl)phenoxy)-2-methylpropanoic acid	18.0433	331.184	331.188	C18H28O4	Phenoxyacetic acid derivatives	NYFMYHQFRBQXEY-UHFFFAOYSA-N	OCCCCCCCCC1=CC=CC(OC(C(O)=O)(C)C)=C1	12.3495	99.7	31.1187
2-(4-aminotetrahydro-2H-pyran-4-yl)acetic acid	17.0147	182.077	182.08	C7H13NO3	Pyranoid amino acids and derivatives	QRIAWCUEIMQLGG-UHFFFAOYSA-N	O=C(O)CC1(N)CCOCC1	13.7302	99.9	61.0329
2-(furan-3-yl)-7,8-dihydroxy-6a,7,10b-trimethyl-octahydro-1H-naphtho[2,1-c]pyran-4-one	17.303	371.18	371.18	C20H28O5	Diterpene lactones	RBEATXBLUJTDQZ-UHFFFAOYSA-N	O=C1OC(C2=COC=C2)CC3(C)C1CCC4(C)C3CCC(O)C4(O)C	1.32011	100	29.9663
2-(N-butylpropionamido)-N-cyclohexylbutanamide	3.87102	297.259	297.254	C17H32N2O2	Tertiary carboxylic acid amides	QMXGNDITXNMQEK-UHFFFAOYSA-N	CCCCN(C(=O)CC)C(CC)C(=O)NC1CCCCC1	17.628	99.5	160.091
2,2,6,6-Tetramethyl-4 piperidone	3.77927	156.138	156.138	C9H17NO	Piperidinones	JWUXJYZVKZKLTJ-UHFFFAOYSA-N	CC1(C)CC(=O)CC(C)(C)N1	0.0640458	100	28.5931
2,2-dimethyl-5-oxotetrahydrofuran-3-carboxylic acid	17.9608	181.057	181.06	C7H10O4	Gamma butyrolactones	UZBOWOQARWWIER-UHFFFAOYSA-N	O=C(O)C1CC(=O)OC1(C)C	16.0168	99.8	38.2845
2,3-dihydro-1H-carbazol-4(9H)-one	10.8173	208.09	208.09	C12H11NO	Carbazoles	DSXKDTZEIWTHRO-UHFFFAOYSA-N	O=C1C=2C=3C=CC=CC3NC2CCC1	1.92225	100	25.3001
2,3-Diphosphoglycerate	12.1985	266.963	266.967	C3H8O10P2	Sugar acids and derivatives	XOHUEYCVLUUEJJ-UWTATZPHSA-N	OC(=O)[C@@H](COP(O)(O)=O)OP(O)(O)=O	14.0467	99.7	20.5984
2,6-diaminopimelic acid; CE0; GMKMEZVLHJARHF-UHFFFAOYSA-N	18.0573	191.103	191.103	C7H14N2O4	Alpha amino acids	GMKMEZVLHJARHF-UHFFFAOYSA-N	C(CC(C(=O)O)N)CC(C(=O)O)N	0.261639	100	91.0417
2,6-dihydroxy-3-mesityl-5-(1,2,3,4-tetrahydroisoquinolin-1-yl)pyrimidin-4(3H)-one	3.66948	378.18	378.18	C22H23N3O3	Tetrahydroisoquinolines	IOIBVYOJSLAKRI-UHFFFAOYSA-N	O=C1C(=C(O)N=C(O)N1C=2C(=CC(=CC2C)C)C)C3NCCC=4C=CC=CC43	0.766831	100	53.4012
2-[1-[1-hydroxy-10,13-dimethyl-3-[3,4,5-trihydroxy-6-[[3,4,5-trihydroxy-6-(hydroxymethyl)oxan-2-yl]oxymethyl]oxan-2-yl]oxy-2,3,4,7,8,9,11,12,14,15,16,17-dodecahydro-1H-cyclopenta[a]phenanthren-17-yl]ethyl]-4,5-dimethyl-2,3-dihydropyran-6-one	12.3886	805.369	805.377	C40H62O14	Withanolide glycosides and derivatives	ZBLWKSUMHLVXAM-UHFFFAOYSA-N	O=C1OC(CC(=C1C)C)C(C)C2CCC3C4CC=C5CC(OC6OC(COC7OC(CO)C(O)C(O)C7O)C(O)C(O)C6O)CC(O)C5(C)C4CCC23C	10.4796	98.6	36.6116
2-[5-(2-hydroxypropyl)oxolan-2-yl]propanoic acid_major	12.1545	220.157	220.154	C10H18O4	Oxolanes	IVOODSRSVJPWLY-UHFFFAOYSA-N	CC(O)CC1CCC(C(C)C(=O)O)O1	14.399	99.8	26.7914
2-amino-4-hydroxypyrimidine-5-carboxylic acid	20.0501	156.038	156.04	C5H5N3O3	Pyrimidinecarboxylic acids	GBADBFAXAWZGHM-UHFFFAOYSA-N	O=C(O)C1=CN=C(N=C1O)N	10.1897	100	36.2734
2-Aminoethylphosphonic acid	19.9689	126.03	126.031	C2H8NO3P	Organic phosphonic acids	QQVDJLLNRSOCEL-UHFFFAOYSA-N	O=P(O)(O)CCN	13.1713	99.9	29.2829
2-Aminophenol; CE0; CDAWCLOXVUBKRW-UHFFFAOYSA-N	6.19225	110.058	110.06	C6H7NO	Aniline and substituted anilines	CDAWCLOXVUBKRW-UHFFFAOYSA-N	c1ccc(c(c1)N)O	18.5353	99.9	104.192
2-Benzoxazolinone; CE0; ASSKVPFEZFQQNQ-UHFFFAOYSA-N	9.6599	136.037	136.039	C7H5NO2	Benzoxazolones	ASSKVPFEZFQQNQ-UHFFFAOYSA-N	c1ccc2c(c1)nc(O)o2	14.7751	99.9	55.8146
2-chloro-4-fluoro-N-[(E)-2-phenylethenyl]sulfonylbenzamide	21.8646	340.024	340.021	C15H11ClFNO3S	4-halobenzoic acids and derivatives	AUMLVMKWJGCERZ-CMDGGOBGSA-N	O=C(NS(=O)(=O)/C=C/c1ccccc1)c1ccc(F)cc1Cl	9.08769	99.8	116.77
2-Guanidinobenzimidazole	19.0398	176.09	176.093	C8H9N5	Benzimidazoles	JJWCTKUQWXYIIU-UHFFFAOYSA-N	C1=CC=C2C(=C1)NC(=N2)N=C(N)N	18.0586	99.8	45.307
2-hydroxy-4-methyl-3H-benzo[e][1,4]diazepin-5(4H)-one	20.0274	191.074	191.072	C10H10N2O2	1,4-benzodiazepines	ZVHUQIMPAVOVTR-UHFFFAOYSA-N	O=C1C=2C=CC=CC2N=C(O)CN1C	9.89156	99.9	52.005
2-Methyl-1,2,3,4-tetrahydro-beta-carboline	15.9725	187.123	187.123	C12H14N2	Beta carbolines	JOFKCNJIUXPJAC-UHFFFAOYSA-N	CN1CCC2=C(C1)NC3=CC=CC=C23	1.22914	100	100.942
2-methyl-4-(pyridin-2-yl)but-3-yn-2-ol	21.2344	184.071	184.07	C10H11NO	Pyridines and derivatives	YBUWIVMOMHEALF-UHFFFAOYSA-N	OC(C#CC1=NC=CC=C1)(C)C	3.2053	100	467.188
2-methylsulfanyl-1,3-benzothiazole	13.3331	182.007	182.009	C8H7NS2	Benzothiazoles	UTBVIMLZIRIFFR-UHFFFAOYSA-N	CSC1=NC2=CC=CC=C2S1	11.3181	99.9	62.724
3-(2-amino-2-oxoethyl)-5-methyl-hexanoic acid	11.1224	210.11	210.11	C9H17NO3	Medium-chain fatty acids	NPDKTSLVWGFPQG-UHFFFAOYSA-N	NC(CC(CC(C)C)CC(O)=O)=O	0.761506	100	275.962
3-(benzo[d][1,3]dioxol-5-yl)-8-((dimethylamino)methyl)-7-hydroxy-2-methyl-6-propyl-4H-chromen-4-one hydrochloride	8.6948	432.147	432.15	C23H26ClNO5	Isoflavones	KUXVSNWZIYUEDJ-UHFFFAOYSA-N	Cl.O=C1C=2C=C(C(O)=C(C2OC(=C1C=3C=CC=4OCOC4C3)C)CN(C)C)CCC	6.22469	99.9	23.0596
3-[(4-chlorobenzoyl)amino]propanoic acid	10.3209	228.041	228.042	C10H10ClNO3	Beta amino acids and derivatives	ZCGLNFAUVVHTQO-UHFFFAOYSA-N	C1=CC(=CC=C1C(=O)NCCC(=O)O)Cl	4.3413	100	47.2797
3`-Aminoacetophenone	13.1421	136.074	136.076	C8H9NO	Alkyl-phenylketones	CKQHAYFOPRIUOM-UHFFFAOYSA-N	CC(=O)C1=CC(N)=CC=C1	13.8158	99.9	31.8517
3Beta-Hydroxy-23,24-Bisnorchol-5-Enic Acid	7.2527	385.218	385.214	C22H34O3	Monohydroxy bile acids, alcohols and derivatives	NPBNRBWMDNZEBN-YTEKVJICSA-N	O=C(O)C(C)C1CCC2C3CC=C4CC(O)CCC4(C)C3CCC12C	10.2281	99.7	23.0191
3-Chlorotyrosine	15.1481	216.043	216.042	C9H10ClNO3	Tyrosine and derivatives	ACWBBAGYTKWBCD-ZETCQYMHSA-N	O=C(O)C(N)CC1=CC=C(O)C(Cl)=C1	3.2864	100	22.8223
3-Deoxo-3Beta-Acetoxydeoxydihydrogedunin	11.6965	530.321	530.311	C30H40O7	Naphthopyrans	HNFPPWVGLWDXQQ-UDYWQXAESA-N	O=C1OC(C2=COC=C2)C3(C(=C1)C4(C)C(OC(=O)C)CC5C(C)(C)C(OC(=O)C)CCC5(C)C4CC3)C	19.1963	97.9	20.3341
3-METHOXYTYRAMINE	14.9892	168.101	168.102	C9H13NO2	Methoxyphenols	DIVQKHQLANKJQO-UHFFFAOYSA-N	COC1=C(C=CC(=C1)CCN)O	3.56926	100	22.3773
3-METHOXYTYROSINE	14.8536	212.089	212.092	C10H13NO4	Tyrosine and derivatives	PFDUUKDQEHURQC-UHFFFAOYSA-N	COC1=CC(CC(N)C(O)=O)=CC=C1O	15.2764	99.8	55.6337
3-Methylpyrazole	18.647	83.0606	83.0604	C4H6N2	Pyrazoles	XKVUYEYANWFIJX-UHFFFAOYSA-N	CC1=NNC=C1	2.88946	100	43.1053
3-Methylxanthine; CE0; GMSNIKWWOQHZGF-UHFFFAOYSA-N	14.6127	167.058	167.056	C6H6N4O2	Xanthines	GMSNIKWWOQHZGF-UHFFFAOYSA-N	Cn1c2c(c(nc1=O)O)nc[nH]2	9.87691	99.9	39.3788
3-octadecanoyloxy-4-(trimethylazaniumyl)butanoate	12.2465	428.371	428.373	C25H49NO4	Acyl carnitines	FNPHNLNTJNMAEE-UHFFFAOYSA-N	CCCCCCCCCCCCCCCCCC(=O)OC(CC(=O)[O-])C[N+](C)(C)C	4.99564	99.9	76.4302
3-Phenylallyl alcohol	11.1224	135.079	135.08	C9H10O	Cinnamyl alcohols	OOCCDEMITAIZTP-QPJJXVBHSA-N	C1=CC=C(C=C1)C=CCO	12.8812	99.9	20.3823
4-({5-[5-hydroxy-3-({[(2Z)-2-methylbut-2-enoyl]oxy}methyl)pentyl]-8a-(hydroxymethyl)-5,6-dimethyl-3,4,4a,5,6,7,8,8a-octahydronaphthalen-1-yl}methoxy)-4-oxobutanoic acid	9.8762	561.281	561.282	C29H46O8	Colensane and clerodane diterpenoids	OVBBFGXDDIFFMB-SDPNRITHSA-N	O=C(OCC(CCO)CCC1(C)C(C)CCC2(C(=CCCC21)COC(=O)CCC(=O)O)CO)C(=CC)C	2.15578	100	20.4933
4-(2-hydroxy-7-methylquinolin-3-yl)-6,7-dimethyl-3,4-dihydro-2H-pyrano[3,2-c]pyridine-2,5(6H)-dione	10.3006	351.131	351.13	C20H18N2O4	Hydroquinolones	OIGDMRGUWODKAI-UHFFFAOYSA-N	O=C1OC=2C=C(N(C(=O)C2C(C=3C=C4C=CC(=CC4=NC3O)C)C1)C)C	3.13274	100	24.7212
4-(3,14-dihydroxy-10,13-dimethylhexadecahydro-1H-cyclopenta[a]phenanthren-17-yl)furan-2(5H)-one	9.87597	397.229	397.23	C23H34O4	Cardenolides and derivatives	XZTUSOXSLKTKJQ-UHFFFAOYSA-N	O=C1OCC(=C1)C2CCC3(O)C4CCC5CC(O)CCC5(C)C4CCC23C	3.29784	100	25.407
4-(3-Phenylpropyl)pyridine	21.4323	198.125	198.128	C14H15N	Pyridines and derivatives	AQIIVEISJBBUCR-UHFFFAOYSA-N	C(CC1=CC=CC=C1)CC1=CC=NC=C1	14.7884	99.8	64.5561
4,4'-Methylenebis(2,6-diethylaniline)	3.93817	311.244	311.248	C21H30N2	Diphenylmethanes	NWIVYGKSHSJHEF-UHFFFAOYSA-N	CCC1=CC(CC2=CC(CC)=C(N)C(CC)=C2)=CC(CC)=C1N	14.6828	99.6	79.1469
4,9-dimethoxy-7-(perfluorobutyl)-5H-furo[3,2-g]chromen-5-one	21.8318	465.039	465.04	C17H9F9O5	Furanochromones	BVUOXVSHTGNMRR-UHFFFAOYSA-N	O=C1C=C(OC=2C(OC)=C3OC=CC3=C(OC)C12)C(F)(F)C(F)(F)C(F)(F)C(F)(F)F	1.95682	100	39.8265
4.4-DDE	14.4546	315.938	315.937	C14H8Cl4	Diphenylmethanes	UCNVFOCBFJOQAL-UHFFFAOYSA-N	ClC(Cl)=C(C1=CC=C(Cl)C=C1)C1=CC=C(Cl)C=C1	0.0949555	100	47.1701
4-[(E)-2-[(1R,4aS,5R,6R,8aR)-6-hydroxy-5-(hydroxymethyl)-5,8a-dimethyl-2-methylidene-3,4,4a,6,7,8-hexahydro-1H-naphthalen-1-yl]ethenyl]-2H-furan-5-one	3.97612	350.227	350.233	C20H28O4	Diterpene lactones	XMJAJFVLHDIEHF-CRBRZBHVSA-N	O=C1OCC=C1C=CC2C(=C)CCC3C(C)(CO)C(O)CCC23C	16.4748	99.3	152.091
4-ACETAMIDOBUTANOATE	17.6355	146.078	146.081	C6H11NO3	Gamma amino acids and derivatives	UZTFMUBKZQVKLK-UHFFFAOYSA-N	CC(=O)NCCCC(=O)O	19.0305	99.9	44.454
4-ACETOXYPHENOL	4.08993	191.011	191.011	C8H8O3	Phenol esters	HBMCQTHGYMTCOF-UHFFFAOYSA-N	O=C(OC1=CC=C(O)C=C1)C	4.71178	100	24.1025
4-amino-1-((2R,3R,4S,5R)-3,4-dihydroxy-5-(hydroxymethyl)tetrahydrofuran-2-yl)pyrimidin-2(1H)-one	9.33018	266.078	266.08	C9H13N3O5	Pyrimidine nucleosides	UHDGCWIWMRVCDJ-XVFCMESISA-N	O=C1N=C(N)C=CN1C2OC(CO)C(O)C2O	7.10313	99.9	21.0956
4-AMINOBUTANOATE	17.9259	104.07	104.071	C4H9NO2	Gamma amino acids and derivatives	BTCSSZJGUNDROE-UHFFFAOYSA-N	C(CC(=O)O)CN	5.76532	100	52.9865
4-Aminohippurate	20.6423	195.076	195.076	C9H10N2O3	Hippuric acids	HSMNQINEKMPTIC-UHFFFAOYSA-N	C1=CC(=CC=C1C(=O)NCC(=O)O)N	4.7161	100	104.499
4-Aminomethylcyclohexanecarboxylic acid	18.7992	158.115	158.118	C8H15NO2	Amino acids	GYDJEQRTZSCIOI-LJGSYFOKSA-N	O=C(O)C1CCC(CN)CC1	14.2299	99.9	21.7319
4-aminovaleric acid betaine; CE0; RXHVPPWXTMHWGY-UHFFFAOYSA-N	20.5455	160.131	160.133	C8H17NO2	NA	RXHVPPWXTMHWGY-UHFFFAOYSA-N	CC(CCC(=O)[O-])[N+](C)(C)C	13.1765	99.9	437.858
4-Chloro-6-O-methylnorlichexanthone	10.629	307.041	307.037	C15H11ClO5	Xanthones	UBUNKICAVVWKMH-UHFFFAOYSA-N	CC1=CC(OC)=CC2=C1C(C3=C(C(Cl)=C(O)C=C3O)O2)=O	14.4282	99.6	36.6879
4'-Demethylepipodophyllotoxin	15.404	401.129	401.124	C21H20O8	Podophyllotoxins	YVCVYCSAAZQOJI-JHQYFNNDSA-N	O=C1OCC2C(O)C3=CC=4OCOC4C=C3C(C5=CC(OC)=C(O)C(OC)=C5)C12	13.4871	99.4	26.3079
4-Guanidinobutanoic acid; CE0; TUHVEAJXIMEOSA-UHFFFAOYSA-N	18.5768	146.091	146.092	C5H11N3O2	Gamma amino acids and derivatives	TUHVEAJXIMEOSA-UHFFFAOYSA-N	C(CC(=O)O)CNC(=N)N	9.51453	100	182.89
4-Hydroxymethylimidazole	10.0514	99.0534	99.0553	C4H6N2O	Imidazoles	QDYTUZCWBJRHKK-UHFFFAOYSA-N	C1=C(NC=N1)CO	19.0803	99.9	56.7465
4-Hydroxyproline; CE0; PMMYEEVYMWASQN-DMTCNVIQSA-N	15.5676	132.064	132.066	C5H9NO3	Proline and derivatives	PMMYEEVYMWASQN-DMTCNVIQSA-N	C1[C@H](CN[C@@H]1C(=O)O)O	15.2954	99.9	32.5886
4-IMIDAZOLEACETIC ACID	12.9306	127.05	127.05	C5H6N2O2	Imidazolyl carboxylic acids and derivatives	PRJKNHOMHKJCEJ-UHFFFAOYSA-N	C1=C(NC=N1)CC(=O)O	3.14836	100	31.6926
4-PYRIDOXATE	9.6599	206.041	206.042	C8H9NO4	Pyridinecarboxylic acids	HXACOUQIXZGNBF-UHFFFAOYSA-N	CC1=NC=C(C(=C1O)C(=O)O)CO	7.61979	100	24.4189
5,6-Dihydro-5-methyluracil	18.991	129.066	129.066	C5H8N2O2	Hydropyrimidines	NBAKTGXDIBVZOO-UHFFFAOYSA-N	OC=1N=C(O)C(C)CN1	4.95871	100	39.3621
5,8-dimethoxyquinoline-2-carbaldehyde	13.9168	218.08	218.08	C12H11NO3	Quinolines and derivatives	JTUCCIJVUMWRPQ-UHFFFAOYSA-N	O=CC1=NC2=C(OC)C=CC(OC)=C2C=C1	0.458547	100	57.9145
5-AMINOLEVULINIC ACID	10.8141	154.049	154.047	C5H9NO3	Delta amino acids and derivatives	ZGXJTSGNIOSYLO-UHFFFAOYSA-N	C(CC(=O)O)C(=O)CN	7.3354	100	40.0736
5-Chlorobenzotriazole	7.1315	154.014	154.017	C6H4ClN3	Benzotriazoles	PZBQVZFITSVHAW-UHFFFAOYSA-N	ClC1=CC2=C(NN=N2)C=C1	16.5567	99.9	21.4477
5-Hydroxy-1,2,3-triazole	7.5938	86.0344	86.0349	C2H3N3O	Triazolones	QEASJVYPHMYPJM-UHFFFAOYSA-N	OC1=CN=NN1	5.4629	100	113.54
5-methanesulfinylpentanenitrile; PlaSMA ID-182	7.5938	146.066	146.064	C6H11NOS	Glucosinolate breakdown metabolites	FGYQUFZANKOISC-UHFFFAOYNA-N	N#CCCCCS(=O)C	13.6926	99.9	83.988
5-Methylcytidine	16.8348	258.109	258.108	C10H15N3O5	Pyrimidine nucleosides	ZAYHVCMSTBRABG-JXOAFFINSA-N	N=C1N=C(O)N(C=C1C)C2OC(CO)C(O)C2O	1.70471	100	180.015
5-METHYLCYTOSINE HYDROCLORIDE	11.5724	126.065	126.066	C5H7N3O	Hydroxypyrimidines	LRSASMSXMSNRBT-UHFFFAOYSA-N	CC1=C(NC(=O)N=C1)N	10.1534	100	121.618
6,8-di-O-methylnidurufin	11.3673	413.123	413.123	C22H20O8	Anthraquinones	GJWLHYZAPSMRLW-LFYVKHLCSA-N	O=C1C2=C(C=C(O[C@]3(C)O[C@H]4[C@@H](O)CC3)C4=C2O)C(C5=CC(OC)=CC(OC)=C51)=O	1.47656	100	21.9074
6-chloro-4,5,7-trihydroxy-9,10-dioxoanthracene-2-carboxylic acid	14.4546	356.975	356.977	C15H7ClO7	Anthracenecarboxylic acids	JGHTWRZCNLXYPF-UHFFFAOYSA-N	O=C(O)C1=CC(O)=C2C(=O)C3=C(O)C(Cl)=C(O)C=C3C(=O)C2=C1	6.61107	99.9	103.287
6-isopropoxynicotinic acid	14.6178	204.061	204.06	C9H11NO3	Pyridinecarboxylic acids	OOIMOWCIYNEWCF-UHFFFAOYSA-N	O=C(O)C1=CN=C(OC(C)C)C=C1	4.41047	100	882.481
7-alpha-hydroxy cholesterol	3.44842	367.334	367.336	C27H46O2	Cholesterols and derivatives	OYXZMSRRJOYLLO-RVOWOUOISA-N	C[C@H](CCCC(C)C)[C@H]1CC[C@@H]2[C@@]1(CC[C@H]3[C@H]2[C@@H](C=C4[C@@]3(CC[C@@H](C4)O)C)O)C	4.19235	99.9	23.8531
7-alpha-hydroxy-4-cholesten-3-one	3.44842	401.338	401.341	C27H44O2	Cholesterols and derivatives	IOIZWEJGGCZDOL-RQDYSCIWSA-N	C[C@H](CCCC(C)C)[C@H]1CC[C@@H]2[C@@]1(CC[C@H]3[C@H]2[C@@H](CC4=CC(=O)CC[C@]34C)O)C	7.97326	99.8	66.9922
7-benzyl-11,14-dimethyl-16-(2-methylpropyl)-10,13-di(propan-2-yl)-17-oxa-1,5,8,11,14-pentazabicyclo[17.3.0]docosane-2,6,9,12,15,18-hexone	12.2179	694.351	694.358	C35H53N5O7	Cyclic depsipeptides	RPJBXUNEXVNBIF-UHFFFAOYSA-N	O=C1OC(C(=O)N(C)C(C(=O)N(C)C(C(O)=NC(C(O)=NCCC(=O)N2CCCC12)CC=3C=CC=CC3)C(C)C)C(C)C)CC(C)C	9.02993	99.2	36.7558
7-Methylguanine	10.3874	166.072	166.072	C6H7N5O	Hypoxanthines	FZWGECJQACGGTI-UHFFFAOYSA-N	NC(N1)=Nc(n2)c(n(C)c2)C(=O)1	4.45589	100	75.2838
9,13-epoxy-3,15,16,18-labdanetetrol	7.253	357.257	357.26	C20H36O5	Diterpenoids	XYPPDQHBNJURHU-PDEMJFSWSA-N	OCCC1(OC2(CC1)C(C)CCC3C(C)(CO)C(O)CCC32C)CO	7.86542	99.8	42.533
9-Ethyl-3-nitro-9H-carbazole	11.3999	241.097	241.097	C14H12N2O2	Carbazoles	WONHLSYSHMRRGO-UHFFFAOYSA-N	CCN1C2=C(C=CC=C2)C2=C1C=CC(=C2)[N+]([O-])=O	1.03693	100	38.335
Abiraterone (CB-7598)	11.3064	350.253	350.248	C24H31NO	Androgens and derivatives	GZOSMCIZMLWJML-APXSMTNNSA-N	C1[C@@H](CC2[C@](C1)([C@]3([C@@](CC=2)([C@]4([C@](CC3)(C(=CC4)C5=CN=CC=C5)C)[H])[H])[H])C)O	14.19	99.5	61.3615
ACETOACETATE	20.6863	103.038	103.039	C4H6O3	Short-chain keto acids and derivatives	WDJHALXBUFZDSR-UHFFFAOYSA-N	CC(=O)CC(=O)O	12.3254	100	37.8598
Acetylcarnitine; CE0; RDHQFKQIGNGIED-UHFFFAOYSA-N	17.5546	204.12	204.123	C9H18NO4	Acyl carnitines	RDHQFKQIGNGIED-UHFFFAOYSA-N	CC(=O)OC(CC(=O)[O-])C[N+](C)(C)C	12.3945	99.9	33.3444
Acetylcholine; CE0; OIPILFWXSMYKGL-UHFFFAOYSA-N	20.6625	146.116	146.118	C7H16NO2	Acyl cholines	OIPILFWXSMYKGL-UHFFFAOYSA-N	CC(=O)OCC[N+](C)(C)C	9.23914	100	174.817
Aconine	12.1487	500.279	500.28	C25H41NO9	Aconitane-type diterpenoid alkaloids	SQMGCPHFHQGPIF-YIGCTVLISA-N	OC1CC(OC)C23C4N(CC)CC1(COC)C3C(OC)C4C5(O)C(O)C(OC)C6(O)CC2C5C6O	2.59854	100	48.3705
Adenine; CE0; GFFGJBXGBJISGV-UHFFFAOYSA-N	9.73182	136.062	136.062	C5H5N5	6-aminopurines	GFFGJBXGBJISGV-UHFFFAOYSA-N	c1nc2c(N)nc[nH]c2n1	0.514472	100	1155.23
Ala-Leu	19.3187	203.139	203.139	C9H18N2O3	Peptides	RDIKFPRVLJLMER-UHFFFAOYSA-N	O=C(O)C(N=C(O)C(N)C)CC(C)C	0.590728	100	29.2735
Alanine conjugated chenodeoxycholic acid	12.6342	446.322	446.326	C27H45NO5	Glycinated bile acids and derivatives	HHGKPVQSNIVPPF-STVJXAOYSA-N	C[C@H](CCC(N[C@@H](C)C(O)=O)=O)[C@H]1CC[C@@]2([H])[C@]3([H])[C@H](O)C[C@]4([H])C[C@H](O)CC[C@]4(C)[C@H]3CC[C@@]21C	8.91724	99.7	45.4713
Alanylleucine (isomer of 675); PlaSMA ID-674	19.3187	203.144	203.14	C9H18N2O3	Dipeptides	RDIKFPRVLJLMER-UHFFFAOYNA-N	O=C(O)C(NC(=O)C(N)C)CC(C)C	18.6571	99.7	77.4357
Alibendol	9.30942	252.122	252.123	C13H17NO4	Salicylamides	UMJHTFHIQDEGKB-UHFFFAOYSA-N	C1=C(C(=C(C=C1CC=C)C(=O)NCCO)O)OC	4.87857	100	43.2571
AM-251	3.41173	555.027	555.021	C22H21Cl2IN4O	Phenylpyrazoles	BUZAJRPLUGXRAB-UHFFFAOYSA-N	ClC1=CC=C(C(Cl)=C1)N2N=C(C(O)=NN3CCCCC3)C(=C2C=4C=CC(I)=CC4)C	11.1707	99.2	23.564
Amantadine	8.93508	152.144	152.143	C10H17N	Monoalkylamines	DKNWSYNQZKUICI-UHFFFAOYSA-N	NC12CC3CC(CC(C3)C1)C2	6.76993	100	20.6454
Aminoadipic Acid	14.3363	144.066	144.066	C6H11NO4	L-alpha-amino acids	OYIFNHCXNCRBQI-BYPYZUCNSA-N	C(C[C@@H](C(=O)O)N)CC(=O)O	1.94356	100	58.22
Ampiroxicam	8.6948	448.122	448.117	C20H21N3O7S	Benzothiazines	LSNWBKACGXCGAJ-UHFFFAOYSA-N	O=C(OCC)OC(OC=1C=2C=CC=CC2S(=O)(=O)N(C1C(O)=NC3=NC=CC=C3)C)C	11.3586	99.5	23.6962
Aniline	15.9551	94.0664	94.0651	C6H7N	Aniline and substituted anilines	PAYRUJLWNCNPSJ-UHFFFAOYSA-N	NC1=CC=CC=C1	13.1824	100	4392.19
ANILINE-2-SULFONATE	11.7433	196.003	196.004	C6H7NO3S	Benzenesulfonic acids and derivatives	ZMCHBSMFKQYNKA-UHFFFAOYSA-N	C1=CC=C(C(=C1)N)S(=O)(=O)O	2.49995	100	21.6285
ANISOMYCIN	18.7892	283.163	283.165	C14H19NO4	Anisoles	YKJYKKNCCRKFSL-BFHYXJOUSA-N	O=C(OC1C(O)CNC1CC2=CC=C(OC)C=C2)C	8.54625	99.9	29.1839
Arachidonic acid	8.62197	327.226	327.229	C20H32O2	Long-chain fatty acids	YZXBAPSDXZZRGB-DOFZRALJSA-N	CCCCC/C=C\C/C=C\C/C=C\C/C=C\CCCC(=O)O	12.1016	99.7	30.2179
Aspicilin	7.45708	346.259	346.259	C18H32O5	Macrolides and analogues	KECCBFYFEOTIBV-KHDHUXSVSA-N	C[C@@H]1OC(=O)/C=C/[C@H]([C@H]([C@@H](CCCCCCCCCC1)O)O)O	1.47289	100	22.3038
Asymmetric dimethylarginine; CE0; YDGMGEXADBMOMJ-LURJTMIESA-N	12.1705	203.154	203.15	C8H18N4O2	Arginine and derivatives	YDGMGEXADBMOMJ-LURJTMIESA-N	CN(C)C(=N)NCCC[C@@H](C(=O)O)N	17.4748	99.7	31.6799
Bakuchiol	9.62483	279.167	279.17	C18H24O	Aromatic monoterpenoids	LFYJSSARVMHQJB-QIXNEVBVSA-N	OC1=CC=C(C=C1)C=CC(C=C)(C)CCC=C(C)C	11.8566	99.8	21.8641
b-Ala-Lys	10.8383	218.147	218.15	C9H19N3O3	Hybrid peptides	PLDCWKCPEXNWJH-ZETCQYMHSA-N	NCCCC[C@@H](C(O)=O)NC(=O)CCN	15.2189	99.8	32.2192
Baquiloprim	13.5376	309.182	309.182	C17H20N6	Aminoquinolines and derivatives	AIOWJIMWVFWROP-UHFFFAOYSA-N	CC1=CC(=C2C=CC=NC2=C1N(C)C)CC3=CN=C(N=C3N)N	2.00529	100	25.1759
BE-43547C	13.2442	592.392	592.396	C32H53N3O7	Macrolide lactams	KVYJAWXEQAHJFZ-FMQUCBEESA-N	O=C(CNC(C(O)(C)C1=O)=O)NC(/C=C/C(N(C)CC(OC(CCCCCCCCCCCCC(C)C)C1C)=O)=O)=C	6.46527	99.7	21.0651
bergenin	11.3681	329.082	329.08	C14H16O9	Gallic acid and derivatives	YWJXCIXBAKGUKZ-HJJNZUOJSA-N	O=C1OC2C(O)C(O)C(OC2C3=C(O)C(OC)=C(O)C=C13)CO	6.10794	99.9	150.398
Betaine; CE30; CE0; KWIUHFFTVRNATP-UHFFFAOYSA-N	21.4758	118.086	118.086	C5H11NO2	Alpha amino acids	KWIUHFFTVRNATP-UHFFFAOYSA-N	C[N+](C)(C)CC(=O)[O-]	1.35494	100	24.2234
Bilirubin	12.3886	602.3	602.297	C33H36N4O6	Bilirubins	BPYKTIZUTYGOLE-IFADSCNNSA-N	O=C(O)CCC1=C(NC(C=C2N=C(O)C(=C2C=C)C)=C1C)CC=3NC(C=C4N=C(O)C(C=C)=C4C)=C(C3CCC(=O)O)C	5.14696	99.9	21.159
BiseokeaniamideA	1.96805	818.465	818.461	C42H65N7O6S	Hybrid peptides	XNASEKUWNLNRSN-LMUGUXCZSA-N	CCCC(N(C)[C@@H](C(C)C)C(N1[C@@H](CCC1)C(N([C@@H](CC2=CC=CC=C2)C(N[C@@H](CC(C)C)C(N(C)[C@H](C(N(CC3=NC=CS3)C)=O)C(C)C)=O)=O)C)=O)=O)=O	4.71617	99.7	20.3833
Bisoprolol	7.37568	326.233	326.233	C18H31NO4	Benzylethers	VHYCDWMUTMEGQY-UHFFFAOYSA-N	CC(C)NCC(O)COc1ccc(COCCOC(C)C)cc1	2.5442	100	25.2421
Bromazepam	7.35503	316.012	316.008	C14H10BrN3O	1,4-benzodiazepines	VMIYHDSEFNYJSL-UHFFFAOYSA-N	BrC=1C=CC=2N=C(O)CN=C(C=3N=CC=CC3)C2C1	11.3921	99.7	28.7519
Bufalin	9.31012	387.246	387.25	C24H34O4	Bufanolides and derivatives	QEEBRPGZBVVINN-BMPKRDENSA-N	O=C1OC=C(C=C1)C2CCC3(O)C4CCC5CC(O)CCC5(C)C4CCC23C	11.3622	99.6	42.0026
Bulleyaconitine A	12.0573	650.327	650.33	C35H49NO9	Aconitane-type diterpenoid alkaloids	YRECILNLFWZVRM-JNQVLWDESA-N	O=C(OC12CC(OC)C3(O)CC(C1C3C(=O)C4=CC=C(OC)C=C4)C56C(OC)CCC7(COC)CN(CC)C6C2C(OC)C75)C	5.25887	99.8	34.018
Bupropion	12.0301	240.116	240.115	C13H18ClNO	Alkyl-phenylketones	SNPPWIUOZRMYNY-UHFFFAOYSA-N	CC(NC(C)(C)C)C(=O)c1cccc(Cl)c1	4.70608	100	25.7263
Butylamine	18.3984	74.0967	74.0964	C4H11N	Monoalkylamines	HQABUPZFAYXKJW-UHFFFAOYSA-N	CCCCN	3.6439	100	20.031
C4-homoserine lactone	7.98702	172.097	172.097	C8H13NO3	N-acyl-alpha amino acids and derivatives	VFFNZZXXTGXBOG-UHFFFAOYSA-N	CCCC(=O)NC1CCOC1=O	3.95126	100	29.6176
Calcimycin	11.8002	524.275	524.276	C29H37N3O6	Benzoxazoles	HIYAVKIYRIFSCZ-CVXKHCKVSA-N	CC1CCC2(C(CC(C(O2)C(C)C(=O)C3=CC=CN3)C)C)OC1CC4=NC5=C(O4)C=CC(=C5C(=O)O)NC	1.73573	100	20.3214
Capsaicin	18.7486	328.181	328.18	C18H27NO3	Methoxyphenols	YKPUWZUDDOIDPM-SOFGYWHQSA-N	O=C(NCC1=CC=C(O)C(OC)=C1)CCCCC=CC(C)C	4.29642	100	22.103
Carbazole	22.2419	168.079	168.081	C12H9N	Carbazoles	UJOBWOGCFQCDNV-UHFFFAOYSA-N	c1ccc2c(c1)c1ccccc1[nH]2	11.7801	99.9	70.7531
Carboline base + 4H, carboxylic acid; PlaSMA ID-805	8.62432	217.101	217.101	C12H12N2O2	Carbolines	FSNCEEGOMTYXKY-UHFFFAOYNA-N	O=C(O)C3NCC=2NC1=CC=CC=C1C=2C3	2.34914	100	29.3502
Carminic Acid	3.44112	515.072	515.08	C22H20O13	Anthracenecarboxylic acids	DGQLVPJVXFOQEV-NGOCYOHBSA-N	O=C(O)C1=C(O)C=C2C(=O)C3=C(O)C(O)=C(C(O)=C3C(=O)C2=C1C)C4OC(CO)C(O)C(O)C4O	14.1532	99	21.4866
Carminomycin I	12.1292	514.166	514.171	C26H27NO10	Anthracyclines	XREUEWVEMYWFFA-CSKJXFQVSA-N	CC(=O)[C@]1(O)Cc2c(O)c3c(c(O)c2[C@@H](O[C@H]2C[C@H](N)[C@H](O)[C@H](C)O2)C1)C(=O)c1c(O)cccc1C3=O	9.29652	99.5	20.7871
Caryophyllene [T(-)]	7.19245	191.179	191.179	C14H22	Branched unsaturated hydrocarbons	INOSMXBKABLUIL-CHWSQXEVSA-N	C=C1CC=C(C)CCC2C1CC2(C)C	0.366148	100	31.9244
Castanospermine	16.9072	190.105	190.107	C8H15NO4	Indolizidines	JDVVGAQPNNXQDW-TVNFTVLESA-N	O[C@@H](C1)[C@@H](O)[C@H](O)[C@@H]([C@@H](O)2)N(CC2)1	12.0458	99.9	177.407
Cefazolin	10.3758	455.032	455.037	C14H14N8O4S3	Cephalosporins	MLYYVTUWGNIJIB-UHFFFAOYSA-N	CC1=NN=C(S1)SCC2=C(N3C(C(C3=O)NC(=O)CN4C=NN=N4)SC2)C(=O)O	10.9661	99.5	24.2093
Ceftiofur	14.4086	524.044	524.036	C19H17N5O7S3	Cephalosporins	ZBHXIWJRIFEVQY-IHMPYVIRSA-N	CO/N=C(/c1csc(n1)N)\C(=O)N[C@H]2[C@@H]3N(C2=O)C(=C(CS3)CSC(=O)c4ccco4)C(=O)O	14.4646	98.8	27.0608
Chloroquine	18.2814	320.194	320.189	C18H26ClN3	4-aminoquinolines	WHTVZRBIWZFKQO-UHFFFAOYSA-N	CC(CCCN(CC)CC)NC1=CC=NC2=CC(Cl)=CC=C12	15.8969	99.5	126.74
Chlorothalonil R611965	10.8348	267.934	267.933	C8H4Cl3NO3	Halobenzoic acids	XKFUETYLBPYNKF-UHFFFAOYSA-N	NC(=O)C1=C(Cl)C(Cl)=CC(C(O)=O)=C1Cl	5.03857	100	23.7111
Cholic Acid, Methyl Ester	7.47895	440.332	440.337	C25H42O5	Trihydroxy bile acids, alcohols and derivatives	DLYVTEULDNMQAR-WRELVWFXSA-N	O=C(OC)CCC(C)C1CCC2C3C(O)CC4CC(O)CCC4(C)C3CC(O)C12C	11.6729	99.5	23.4701
Choline [M]+	20.7451	104.105	104.107	C5H14NO+	Cholines	OEYIOHPDSNJKLS-UHFFFAOYSA-N	OCC[N+](C)(C)C	15.2727	100	237.72
Chromafenozide	10.3506	395.237	395.233	C24H30N2O3	1-benzopyrans	HPNSNYBUADCFDR-UHFFFAOYSA-N	Cc(c3)cc(cc(C)3)C(=O)N(NC(=O)c(c1)c(C)c(C2)c(OCC2)c1)C(C)(C)C	10.6013	99.7	23.8779
Chrysanthemic Acid	3.74273	186.145	186.149	C10H16O2	Monocyclic monoterpenoids	XLOPRKKSAJMMEW-UHFFFAOYSA-N	O=C(O)C1C(C=C(C)C)C1(C)C	17.9964	99.8	20.7259
CI-1044	3.64328	398.164	398.161	C23H19N5O2	N-acyl-alpha amino acids and derivatives	XGXOSJSGDNPEEF-NRFANRHFSA-N	NC1=CC2=C3N(CCC3=C1)C(=O)[C@H](NC(=O)C1=CC=CN=C1)N=C2C1=CC=CC=C1	6.88164	99.8	37.35
Cinanserin	17.8719	341.165	341.168	C20H24N2OS	Cinnamic acid amides	RSUVYMGADVXGOU-BUHFOSPRSA-N	OC(=NC=1C=CC=CC1SCCCN(C)C)C=CC=2C=CC=CC2	9.99507	99.8	20.176
Cinnamamide	7.47895	148.075	148.076	C9H9NO	Cinnamic acid amides	APEJMQOBVMLION-VOTSOKGWSA-N	NC(=O)\C=C\C1=CC=CC=C1	1.89092	100	76.9988
cis-9,10-methylene-hexadecanoic acid	7.43327	269.25	269.248	C17H32O2	Medium-chain fatty acids	MUZYOAHCGSIXJH-JKSUJKDBSA-N	CCCCCCC1CC1CCCCCCCC(=O)O	7.42811	99.9	20.5171
Citrazinc acid	7.15273	156.03	156.029	C6H5NO4	Pyridinecarboxylic acids	CSGQJHQYWJLPKY-UHFFFAOYSA-N	O=C(O)C=1C=C(O)N=C(O)C1	4.29407	100	20.9312
CITRULLINE	20.363	198.086	198.085	C6H13N3O3	L-alpha-amino acids	RHGKLRLOHDJJDR-BYPYZUCNSA-N	C(C[C@@H](C(=O)O)N)CNC(=O)N	3.93771	100	41.5213
Clopyralid	8.0617	191.958	191.961	C6H3Cl2NO2	Pyridinecarboxylic acids	HUBANNPOLNYSAD-UHFFFAOYSA-N	OC(=O)c1nc(Cl)ccc1Cl	14.8988	99.8	47.806
Clozapine	11.9819	327.137	327.137	C18H19ClN4	Dibenzodiazepines	ZUXABONWMNSFBN-UHFFFAOYSA-N	CN1CCN(CC1)C1=C2C=CC=CC2=Nc2ccc(Cl)cc2N1	1.16159	100	37.177
Coprostanone	2.04665	369.355	369.352	C27H46O	Cholesterols and derivatives	PESKGJQREUXSRR-JAGYRSRJSA-N	C(C)(C1)(C(C(C)CCCC(C)C)4)C(CC4)C(C2)C(C(C)(C3)C([H])(CC(C3)=O)C2)C1	8.23064	99.8	33.5865
CREATINE	18.1368	132.076	132.077	C4H9N3O2	Alpha amino acids and derivatives	CVSVTCORWBXHQV-UHFFFAOYSA-N	CN(CC(=O)O)C(=N)N	9.46419	100	374.74
Crotamiton	19.1354	204.135	204.138	C13H17NO	Anilides	DNTGGZPQPQTDQF-XBXARRHUSA-N	CCN(C(=O)\C=C\C)c1ccccc1C	14.1571	99.8	134.524
Crotonoside	11.2425	306.08	306.08	C10H13N5O5	Purine nucleosides	MIKUYHXYGGJMLM-UUOKFMHZSA-N	O=C1N=C(N)C=2N=CN(C2N1)C3OC(CO)C(O)C3O	0.686095	100	31.1475
Curcumin	19.1592	386.166	386.16	C21H20O6	Curcuminoids	VFLDPWHFBUODDF-FCXRPNKRSA-N	O=C(C=CC1=CC=C(O)C(OC)=C1)CC(=O)C=CC2=CC=C(O)C(OC)=C2	16.5217	99.2	83.7628
cyclopenin	9.8536	317.087	317.09	C17H14N2O3	1,4-benzodiazepines	APLKWZASYUZSBL-PBHICJAKSA-N	O=C1C=2C=CC=CC2N=C(O)C3(OC3C=4C=CC=CC4)N1C	8.07343	99.9	85.5865
CYCLOPENTANONE	20.6919	102.091	102.091	C5H8O	Cyclic ketones	BGTOWKSIORTVQH-UHFFFAOYSA-N	C1CCC(=O)C1	0.391806	100	45.4815
Cyclo-prolylglycine; PlaSMA ID-262	20.8153	155.081	155.082	C7H10N2O2	Amino acids	OWOHLURDBZHNGG-UHFFFAOYNA-N	O=C1CNC(=O)C2CCCN12	3.86893	100	1439.32
CYCLOSERINE	15.7056	103.052	103.05	C3H6N2O2	Alpha amino acids and derivatives	DYDCUQKUCUHJBH-UWTATZPHSA-N	OC1=NOCC1N	15.5264	99.9	24.0102
CYS-GLY	7.15163	179.048	179.048	C5H10N2O3S	Dipeptides	ZUKPVRWZDMRIEO-VKHMYHEASA-N	C([C@@H](C(=O)NCC(=O)O)N)S	3.2952	100	31.4306
Cysteine conjugated chenodeoxycholic acid	12.4202	518.286	518.291	C27H45NO5S	Glycinated bile acids and derivatives	RIGHMQLKMHLMQD-DYUDRYMLSA-N	C[C@H](CCC(N[C@@H](CS)C(O)=O)=O)[C@H]1CC[C@@]2([H])[C@]3([H])[C@H](O)C[C@]4([H])C[C@H](O)CC[C@]4(C)[C@H]3CC[C@@]21C	9.41556	99.5	22.435
Cysteine conjugated cholic acid	7.253	534.281	534.286	C27H45NO6S	Glycinated bile acids and derivatives	OYWYHAQWNNRFLI-FXNHETLCSA-N	C[C@H](CCC(N[C@@H](CS)C(O)=O)=O)[C@H]1CC[C@@]2([H])[C@]3([H])[C@H](O)C[C@]4([H])C[C@H](O)CC[C@]4(C)[C@H]3C[C@H](O)[C@@]21C	9.63903	99.5	24.516
Cytosine; CE0; OPTASPLRGRRNAP-UHFFFAOYSA-N	8.10613	112.05	112.051	C4H5N3O	Pyrimidones	OPTASPLRGRRNAP-UHFFFAOYSA-N	c1cnc([nH]c1=N)O	8.38907	100	52.4196
D-(+)-GALACTOSAMINE	9.3325	180.086	180.087	C6H13NO5	Hexoses	MSWZFWKMSRAUBD-GASJEMHNSA-N	C([C@@H]1[C@@H]([C@@H]([C@H](C(O1)O)N)O)O)O	3.05409	100	31.7959
dehydroabietic acid	9.61163	339.172	339.172	C20H28O2	Diterpenoids	NFWKVWVWBFBAOV-IPNZSQQUSA-N	O=C(O)C1(C)CCCC2(C3=CC=C(C=C3CCC12)C(C)C)C	0.0294836	100	71.4487
Dehydrophytosphingosine (not validated) - 2H	4.2351	314.266	314.269	C18H35NO3	1,3-aminoalcohols	WWXZQFWOWANITM-AQASXUMVSA-N	CCCCCCCCC\C=C\C=C\CC(O)C(O)C(N)CO	8.52773	99.9	29.9191
DEOXYCORTICOSTERONE ACETATE	9.89895	395.216	395.219	C23H32O4	Gluco/mineralocorticoids, progestogins and derivatives	VPGRYOFKCNULNK-UHFFFAOYSA-N	CC(=O)OCC(=O)C1CCC2C1(CCC3C2CCC4=CC(=O)CCC34C)C	7.26179	99.8	23.9423
DEOXYCYTIDINE	21.9219	228.099	228.098	C9H13N3O4	Pyrimidine 2'-deoxyribonucleosides	CKTSBUTUHBMZGZ-SHYZEUOFSA-N	C1[C@@H]([C@H](O[C@H]1N2C=CC(=NC2=O)N)CO)O	4.86633	100	30.7171
DEOXYGUANOSINE	11.6179	290.085	290.086	C10H13N5O4	Purine 2'-deoxyribonucleosides	YKBGVTZYEHREMT-KVQBGUIXSA-N	NC1=NC2=C(N=CN2[C@H]2C[C@H](O)[C@@H](CO)O2)C(=O)N1	2.65439	100	50.5553
desethyl-desisopropyl-atrazine	10.8811	146.024	146.023	C3H4ClN5	Chloro-s-triazines	FVFVNNKYKYZTJU-UHFFFAOYSA-N	c1(nc(nc(n1)Cl)N)N	7.53307	100	22.506
Desphenyl chloridazon	8.1636	146.011	146.012	C4H4ClN3O	Aminopyridazines	FEWPCPCEGBPTAL-UHFFFAOYSA-N	NC1=C(Cl)C(=O)NN=C1	1.84917	100	26.0613
DG(20:5/0:0/20:5) (d5)	8.01107	688.496	688.496	C43H59D5O5	Other hydroxyeicosapolyenoic acids	TXYVJIXIUGRAFF-VSBNSUKNSA-N	[2H]C(OC(=O)CCC/C=C\C/C=C\C/C=C\C/C=C\C/C=C\CC)(C(O)(C(OC(=O)CCC/C=C\C/C=C\C/C=C\C/C=C\C/C=C\CC)([2H])[2H])[2H])[2H]	0.101671	100	30.3816
DIACETYL	18.5783	87.0427	87.044	C4H6O2	Alpha-diketones	QSJXEFYPDANLFS-UHFFFAOYSA-N	CC(=O)C(=O)C	15.2796	100	26.7436
Diallyl Trisulfide	18.7743	179.001	179.002	C6H10S3	Organic trisulfides	UBAXRAHSPKWNCX-UHFFFAOYSA-N	S(SCC=C)SCC=C	1.34077	100	780.2
DIBOA	9.66007	182.045	182.045	C8H7NO4	Benzoxazinones	COVOPZQGJGUPEY-UHFFFAOYSA-N	O=C1N(O)C2=CC=CC=C2(OC1(O))	0.439452	100	29.7636
Dicarboxyl-2Et-A4EO3	9.87597	295.136	295.139	C12H22O8	Polyethylene glycols	HRIGDWRZOSHVQG-UHFFFAOYSA-N	OCCOCCOCCOCC(CC(=O)O)CC(=O)O	7.89459	99.9	28.8611
Dichlormid	7.1717	208.025	208.029	C8H11Cl2NO	Tertiary carboxylic acid amides	YRMLFORXOOIJDR-UHFFFAOYSA-N	C=CCN(CC=C)C(=O)C(Cl)Cl	18.0263	99.7	99.374
Dihydrocapsaicin	3.92505	308.217	308.22	C18H29NO3	Methoxyphenols	XJQPQKLURWNAAH-UHFFFAOYSA-N	O=C(NCC1=CC=C(O)C(OC)=C1)CCCCCCC(C)C	9.08442	99.8	39.1501
Dihydrochalcone	11.1224	211.113	211.112	C15H14O	Retro-dihydrochalcones	QGGZBXOADPVUPN-UHFFFAOYSA-N	C1=CC=C(C=C1)CCC(=O)C2=CC=CC=C2	6.91577	100	92.732
Dihydrochelerythrine	8.1185	350.142	350.14	C21H19NO4	Dihydrobenzophenanthridine alkaloids	ALZAZMCIBRHMFF-UHFFFAOYSA-N	O(C=1C=CC=2C3=CC=C4C=C5OCOC5=CC4=C3N(C)CC2C1OC)C	6.54024	99.9	20.3663
Dihydrojasmone	7.19245	167.143	167.143	C11H18O	Cyclic ketones	YCIXWYOBMVNGTB-UHFFFAOYSA-N	CCCCCC(=C(C)1)C(=O)CC1	1.55555	100	62.0618
Dihydroxy (3Alpha,12Alpha)Pregnan-20-One_major	9.3325	357.238	357.24	C21H34O3	Gluco/mineralocorticoids, progestogins and derivatives	QIVOTMOKECOCJC-OKUZHXNBSA-N	CC(=O)C1CCC2C3CCC4CC(O)CCC4(C)C3CC(O)C12C	7.05408	99.9	26.4219
Dimethyl?sulfoxide	8.19315	79.0203	79.0212	C2H6OS	Sulfoxides	IAZDPXIOMUYVGZ-UHFFFAOYSA-N	O=S(C)C	11.0097	100	20.6541
Dodecylamine	12.4657	186.221	186.222	C12H27N	Monoalkylamines	JRBPAEWTRLWTQC-UHFFFAOYSA-N	CCCCCCCCCCCCN	1.77208	100	39.3868
Dodemorph	3.64353	282.281	282.279	C18H35NO	Morpholines	JMXKCYUTURMERF-UHFFFAOYSA-N	CC1CN(CC(C)O1)C1CCCCCCCCCCC1	5.8807	99.9	885.824
Drofenine	3.86607	318.239	318.243	C20H31NO2	Benzene and substituted derivatives	AGJBLWCLQCKRJP-UHFFFAOYSA-N	[H]c(c([H])2)c([H])c([H])c(c([H])2)C([H])(C(=O)OC([H])([H])C([H])([H])N(C([H])([H])C([H])([H])[H])C([H])([H])C([H])([H])[H])C([H])(C([H])([H])1)C([H])([H])C([H])([H])C([H])([H])C([H])([H])1	12.789	99.7	29.3746
D-sorbosonic acid	17.9259	195.046	195.05	C6H10O7	Sugar acids and derivatives	VBUYCZFBVCCYFD-FLRLBIABSA-N	O=C(O)C(=O)C(O)C(O)C(O)CO	18.0979	99.8	33.7826
Ecgonine	7.69502	186.112	186.112	C9H15NO3	Tropane alkaloids	PHMBVCPLDPDESM-FKSUSPILSA-N	O=C(O)C1C(O)CC2N(C)C1CC2	0.913426	100	656.996
Ectoine	20.5128	143.079	143.082	C6H10N2O2	Alpha amino acids and derivatives	WQXNXVUDBPYKBA-YFKPBYRVSA-N	CC1=NCCC(N1)C(=O)O	15.3759	99.9	29.0231
Eicosanoids_11-HEPE_C20H30O3	3.76367	336.248	336.253	C20H30O3	Hydroxyeicosapentaenoic acids	IDEHSDHMEMMYIR-WSAGHCNZSA-N	CC\C(=C(/C\C(=C(/C(=C(/C(C\C(=C(/C\C(=C(/CCCC(=O)O)\[H])\[H])\[H])\[H])O)\[H])/[H])\[H])\[H])\[H])\[H]	15.2564	99.5	35.5558
Eicosanoids_PGF1?_C20H36O5	7.2527	339.255	339.253	C20H36O5	Prostaglandins and related compounds	DZUXGQBLFALXCR-BMPPNWMBSA-N	CCCCC[C@@](\C(=C(\C1([C@@](CCCCCCC(=O)O)([C@](C[C@]1(O)[H])(O)[H])[H])[H])/[H])\[H])(O)[H]	6.80908	99.9	22.6775
Eleutheroside B	17.5121	373.15	373.15	C17H24O9	Phenolic glycosides	QJVXKWHHAMZTBY-GCPOEHJPSA-N	OCC=CC1=CC(OC)=C(OC2OC(CO)C(O)C(O)C2O)C(OC)=C1	0.24119	100	20.5441
Epalrestat	9.96902	320.045	320.041	C15H13NO3S2	Alpha amino acids and derivatives	CHNUOJQWGUIOLD-NFZZJPOKSA-N	C1=CC=CC(=C1)/C=C(/C=C2\SC(N(C2=O)CC(O)=O)=S)C	11.7173	99.7	24.2169
Epoxiconazole	11.3488	330.085	330.08	C17H13ClFN3O	Stilbenes	ZMYFCFLJBGAQRS-UHFFFAOYSA-N	FC1=CC=C(C=C1)C1(CN2C=NC=N2)OC1C1=CC=CC=C1Cl	13.3907	99.6	30.6624
Erucamide	3.56805	338.341	338.342	C22H43NO	Fatty amides	UAUDZVJPLUQNMU-KTKRTIGZSA-N	N=C(O)CCCCCCCCCCCC=CCCCCCCCC	2.4827	100	78.2656
ERYTHRITOL	20.1928	145.047	145.047	C4H10O4	Sugar alcohols	UNXHWFMMPAWVPI-ZXZARUISSA-N	OC[C@H](O)[C@H](O)CO	1.86146	100	32.5129
Ethion	12.1082	385	384.995	C9H22O4P2S4	Dithiophosphate O-esters	RIZMRRKBZQXFOY-UHFFFAOYSA-N	CCOP(=S)(OCC)SCSP(=S)(OCC)OCC	12.4677	99.5	30.432
Ethyl-4-dimethylaminobenzoate	11.6965	194.116	194.118	C11H15NO2	Benzoic acid esters	FZUGPQWGEGAKET-UHFFFAOYSA-N	CCOC(=O)C1=CC=C(C=C1)N(C)C	7.98485	100	83.061
Fenfluramine	19.8892	232.13	232.131	C12H16F3N	Amphetamines and derivatives	DBGIVFWFUFKIQN-UHFFFAOYSA-N	FC(F)(F)C=1C=CC=C(C1)CC(NCC)C	1.59393	100	26.3641
Fenuron	7.74022	165.101	165.102	C9H12N2O	Benzene and substituted derivatives	XXOYNJXVWVNOOJ-UHFFFAOYSA-N	CN(C)C(=O)Nc1ccccc1	4.4215	100	20.7796
Fexofenadine	12.0813	502.293	502.295	C32H39NO4	Diphenylmethanes	RWTNPBWLLIMQHL-UHFFFAOYSA-N	CC(C)(C1=CC=C(C=C1)C(CCCN2CCC(CC2)C(C3=CC=CC=C3)(C4=CC=CC=C4)O)O)C(=O)O	3.98172	99.9	21.2554
Flurazepam	3.72507	410.141	410.141	C21H23ClFN3O	1,4-benzodiazepines	SAADBVWGJQAEFS-UHFFFAOYSA-N	CCN(CC)CCN1c2ccc(cc2C(=NCC1=O)c3ccccc3F)Cl	1.24348	100	23.1775
Fucosterol	7.19248	413.363	413.37	C29H48O	Stigmastanes and derivatives	OSELKOCHBMDKEJ-QPSGOUHRSA-N	OC1CC2=CCC3C(CCC4(C)C(CCC34)C(C)CCC(=CC)C(C)C)C2(C)CC1	17.9016	98.9	24.7294
Furanodienon	19.1667	231.131	231.13	C15H18O2	Germacrane sesquiterpenoids	XVOHELPNOXGRBQ-NXAIOARDSA-N	O=C1C=C(C)CCC=C(C)CC=2OC=C(C12)C	4.75923	100	69.2299
Gabapentin (Neurontin)	3.74082	172.134	172.133	C9H17NO2	Gamma amino acids and derivatives	UGJMXCAKCUNAIE-UHFFFAOYSA-N	C1CCCC(C1)(CC(O)=O)CN	4.00852	100	46.2467
Geranic acid	3.75938	169.121	169.122	C10H16O2	Acyclic monoterpenoids	ZHYZQXUYZJNEHD-VQHVLOKHSA-N	O=C(O)C=C(C)CCC=C(C)C	8.86932	100	21.4042
geraniol	16.4897	177.129	177.13	C10H18O	Acyclic monoterpenoids	GLZPCOQZEFWAFX-JXMROGBWSA-N	OCC=C(C)CCC=C(C)C	7.9038	100	38.3109
Geranyl acetone	7.37568	195.173	195.174	C13H22O	Acyclic monoterpenoids	HNZUNIKWNYHEJJ-FMIVXFBMSA-N	CC(=CCCC(=CCCC(=O)C)C)C	8.96634	99.9	27.1227
GLUCOSAMINATE	7.59637	218.059	218.064	C6H13NO6	D-alpha-amino acids	UFYKDFXCZBTLOO-UHFFFAOYSA-N	C(C(C(C(C(C(=O)O)N)O)O)O)O	18.8477	99.7	27.4716
GLUCOSAMINE 6-SULFATE	9.59577	242.031	242.033	C6H13NO8S	Hexoses	MTDHILKWIRSIHB-QZABAPFNSA-N	N[C@H]1[C@H](O)O[C@H](COS(O)(=O)=O)[C@@H](O)[C@@H]1O	7.85017	99.9	38.9583
Glucose	8.10613	181.071	181.071	C6H12O6	Hexoses	GZCGUPFRVQAUEE-SLPGGIOYSA-N	O=CC(O)C(O)C(O)C(O)CO	2.42999	100	32.8795
Glutamate conjugated chenodeoxycholic acid	13.738	544.333	544.324	C29H47NO7	Glycinated bile acids and derivatives	MHOZNCAVRHAOKT-VVJLALRJSA-N	C[C@H](CCC(N[C@@H](CCC(O)=O)C(O)=O)=O)[C@H]1CC[C@@]2([H])[C@]3([H])[C@H](O)C[C@]4([H])C[C@H](O)CC[C@]4(C)[C@H]3CC[C@@]21C	15.8729	98.8	21.4903
Glyceryl linolenate	13.0922	370.297	370.295	C21H36O4	Lineolic acids and derivatives	GGJRAQULURVTAJ-PDBXOOCHSA-N	O=C(OCC(O)CO)CCCCCCCC=CCC=CCC=CCC	3.78077	100	46.5183
Glycine	19.3972	76.0381	76.0393	C2H5NO2	Alpha amino acids	DHMQDGOQFOQNFH-UHFFFAOYSA-N	C(C(=O)O)N	16.3074	100	29.4759
Glycyl-L-proline	17.2642	173.092	173.092	C7H12N2O3	Dipeptides	KZNQNBZMBZJQJO-YFKPBYRVSA-N	NCC(=O)N(C1)C(CC1)C(O)=O	1.9065	100	73.5683
Glyphosat [M+Na+]	11.3681	192.007	192.003	C3H8NO5P	Alpha amino acids and derivatives	XDDAORKBJWWYJS-UHFFFAOYSA-N	C(C(=O)O)NCP(=O)(O)O	17.5518	99.8	60.8027
Grayanotoxin I	7.25972	413.25	413.253	C22H36O7	Leucothol and grayanotoxane diterpenoids	NXCYBYJXCJWMRY-VGBBEZPXSA-N	O=C(OC1C2CCC3C(O)(C)C4CC(O)C(C)(C)C4(O)C(O)CC13CC2(O)C)C	9.17113	99.7	25.5486
GUANINE	7.17272	174.04	174.039	C5H5N5O	Purines and purine derivatives	UYTPUPDQBNUYGX-UHFFFAOYSA-N	NC1=NC(=O)C2=C(N1)N=CN2	6.66519	100	20.6016
Gyrophoric acid	3.44112	491.09	491.095	C24H20O10	Depsides and depsidones	ATQPZSQVWCPVGV-UHFFFAOYSA-N	Cc1cc(OC(=O)c2c(C)cc(OC(=O)c3c(C)cc(O)cc3O)cc2O)cc(O)c1C(=O)O	9.52973	99.6	26.0448
h_48_dehydrochlormethyltestosterone	17.9608	317.168	317.167	C20H27ClO2	Androgens and derivatives	AGUNEISBPXQOPA-XMUHMHRVSA-N	O=C1C=C[C@@]2(C)C(CC[C@@H]3[C@@H]2CC[C@@]4(C)[C@H]3CC[C@]4(C)O)=C1Cl	2.64845	100	52.3822
Hexaethylene glycol; CE0; IIRDTKBZINWQAW-UHFFFAOYSA-N	10.6634	283.175	283.175	C12H26O7	Polyethylene glycols	IIRDTKBZINWQAW-UHFFFAOYSA-N	C(COCCOCCOCCOCCOCCO)O	2.15414	100	37.0972
hexylphenazolone	18.3754	258.148	258.149	C16H19NO2	Alpha amino acids and derivatives	WNHWMFLENIGCEV-OWBHPGMISA-N	O=C1/C(N=C(CCCCCC)O1)=C/C2=CC=CC=C2	3.71878	100	36.6911
HISTIDINOL	9.28592	124.087	124.087	C6H11N3O	Aralkylamines	ZQISRDCJNBUVMM-YFKPBYRVSA-N	N[C@H](CO)CC1=CN=CN1	3.86826	100	27.4709
HMBOA + O-HexA; PlaSMA ID-2082	21.9661	374.11	374.109	C15H19NO10	Benzoxazinoids	UJMUKMDTAKPTHE-UHFFFAOYNA-N	COC1=CC2=C(NC(O)C(OC3OC(C(O)C(O)C3O)C(O)=O)O2)C=C1	3.23435	100	25.01
HYDRASTINE (1R, 9S)	10.7295	406.134	406.126	C21H21NO6	Phthalide isoquinolines	JZUTXVTYJDCMDU-MOPGFXCFSA-N	O=C1OC(C2=CC=C(OC)C(OC)=C12)C3C4=CC=5OCOC5C=C4CCN3C	18.7134	98.9	31.8617
Hydrocotarnine; PlaSMA ID-839	9.875	222.11	222.112	C12H15NO3	Others	XXANNZJIZQTCBP-UHFFFAOYSA-N	COC1=C2CN(C)CCC2=CC2=C1OCO2	10.22	99.9	47.7594
hydroquinidine	11.4483	327.2	327.2	C20H26N2O2	Cinchona alkaloids	LJOQGZACKSYWCH-NIHZBZNOSA-N	OC(C=1C=CN=C2C=CC(OC)=CC21)C3N4CCC(C3)C(C4)CC	1.19193	100	28.9495
Hydroxypyridin + C5H10NO or 6-Hydroxypseudooxynicotine (not validated)	8.08132	195.109	195.113	C10H14N2O2	Aryl alkyl ketones	UMLOUOBDBGOHHR-UHFFFAOYSA-N	O=C(C=1C=NC(O)=CC=1)CCCNC	16.9645	99.8	38.0836
Hydroxyurea	7.4628	77.0349	77.0345	CH4N2O2	Carboximidic acids and derivatives	VSNHCAURESNICA-UHFFFAOYSA-N	NC(=O)NO	4.93285	100	29.3913
Hypoxanthine; CE0; FDGQSTZJBFJUBT-UHFFFAOYSA-N	9.01735	137.044	137.046	C5H4N4O	Hypoxanthines	FDGQSTZJBFJUBT-UHFFFAOYSA-N	c1nc2c([nH]1)ncnc2O	12.3316	99.9	104.897
icos-19-ene-1,2,4-triol	3.97612	367.268	367.261	C20H40O3	Long-chain fatty alcohols	QVLYXPULBWQTJW-UHFFFAOYSA-N	OCC(O)CC(O)CCCCCCCCCCCCCCC=C	18.815	99.1	25.9458
Indatraline	10.7738	292.071	292.065	C16H15Cl2N	Indanes	SVFXPTLYMIXFRX-XJKSGUPXSA-N	ClC1=CC=C(C=C1Cl)C2C=3C=CC=CC3C(NC)C2	18.3863	99.4	24.1158
Indazole	18.0228	119.058	119.06	C7H6N2	Indazoles	BAXOFTOLAUCFNW-UHFFFAOYSA-N	c1n[nH]c2ccccc12	17.3861	99.9	62.3588
Indole-3-carboxylic acid; CE0; KMAKOBLIOCQGJP-UHFFFAOYSA-N	7.1717	162.054	162.055	C9H7NO2	Indolecarboxylic acids and derivatives	KMAKOBLIOCQGJP-UHFFFAOYSA-N	c1ccc2c(c1)c(c[nH]2)C(=O)O	8.94758	100	20.3733
INDOLEACETALDEHYDE	9.92132	182.054	182.058	C10H9NO	3-alkylindoles	WHOOUMGHGSPMGR-UHFFFAOYSA-N	O=CCC1=CNC2=CC=CC=C12	19.3895	99.8	115.236
Indoline	15.4375	120.08	120.081	C8H9N	Indolines	LPAGFVYQRIESJQ-UHFFFAOYSA-N	C1CC2=CC=CC=C2N1	5.57958	100	73.1665
Isoleucine	18.399	132.099	132.102	C6H13NO2	Isoleucine and derivatives	AGPKZVBTJJNPAG-WHFBIAKZSA-N	CC[C@H](C)[C@@H](C(=O)O)N	18.9248	99.9	100.075
ISOPALMITIC ACID	10.9464	274.272	274.274	C16H32O2	Long-chain fatty acids	ZONJATNKKGGVSU-UHFFFAOYSA-N	O=C(O)CCCCCCCCCCCCC(C)C	7.47428	99.9	89.3308
Isosafrole	7.59637	201.03	201.031	C10H10O2	Benzodioxoles	VHVOLFRBFDOUSH-NSCUHMNNSA-N	O1C2=CC=C(C=CC)C=C2OC1	5.12358	100	36.216
Isoxaflutole	15.1187	360.047	360.051	C15H12F3NO4S	Aryl-phenylketones	OYIKARCXOQLFHF-UHFFFAOYSA-N	FC(F)(F)c(c3)cc(S(C)(=O)=O)c(c3)C(=O)c(c2)c(on2)C(C1)C1	12.1649	99.6	24.5719
Kainic Acid	2.16198	252.067	252.063	C10H15NO4	Kainoids	VLSMHEGGTFMBBZ-OOZYFLPDSA-N	O=C(O)CC1C(NCC1C(=C)C)C(=O)O	13.2506	99.8	67.677
Karacoline	3.5107	378.261	378.26	C22H35NO4	Aconitane-type diterpenoid alkaloids	HKQZUYOVMYOFIT-JEJCSOMWSA-N	OC1CCC2(C)CN(CC)C3C4CC2C13C5CC6C(O)C5C4(O)CC6OC	1.82414	100	22.7977
Ketamine	10.1975	238.102	238.099	C13H16ClNO	Chlorobenzenes	YQEZLKZALYSWHR-UHFFFAOYSA-N	CNC1(CCCCC1=O)C2=CC=CC=C2Cl	9.99583	99.9	44.972
Ketoisovaleric acid	21.8856	117.054	117.055	C5H8O3	Short-chain keto acids and derivatives	QHKABHOOEWYVLI-UHFFFAOYSA-N	O=C(O)C(=O)C(C)C	5.29667	100	42.0129
Koumine	17.9122	329.164	329.16	C20H22N2O	3-alkylindoles	VTLYEMHGPMGUOT-SQMWYMQWSA-N	N=1C=2C=CC=CC2C34C1C5OCC6C(N(C)CC3(C=C)C6C5)C4	11.8483	99.7	26.9621
L-694,247	3.69432	412.142	412.144	C20H21N5O3S	Tryptamines and derivatives	HKXMQLISPYELRD-UHFFFAOYSA-N	O=S(=O)(NC1=CC=C(C=C1)CC2=NOC(=N2)C3=CC=C4NC=C(C4=C3)CCN)C	5.33794	99.9	65.9126
Lactosyl (?) C12 Ceramide	11.4324	806.562	806.562	C42H79NO13	Glycosyl-N-acylsphingosines	KNWHKVBHCLQVFX-VCIDKZPKSA-N	CCCCCCCCCCCCC/C=C/[C@H]([C@H](CO[C@H]1C(C([C@@H]([C@H](O1)CO)O[C@H]2C(C([C@H]([C@H](O2)CO)O)O)O)O)O)NC(=O)CCCCCCCCCCC)O	0.421542	100	75.6162
Lagochilin	7.21147	357.264	357.264	C20H36O5	Diterpenoids	XYPPDQHBNJURHU-SSLRCSEFSA-N	C[C@@H]1CCC2[C@](C)(CC[C@H](O)[C@@]2(C)CO)[C@]12CCC(CO)(CCO)O2	0.699764	100	39.209
Lagochilin_major	7.19887	374.285	374.29	C20H36O5	Diterpenoids	XYPPDQHBNJURHU-RHFXQVJCSA-N	CC1CCC2C(C)(CO)C(O)CCC2(C)C12CCC(CO)(CCO)O2	13.893	99.5	29.5106
L-ALANINE	18.1368	90.0534	90.055	C3H7NO2	Alanine and derivatives	QNAYBMKLOCPYGJ-REOHCLBHSA-N	C[C@@H](C(=O)O)N	17.3228	100	35.4384
LAUROYLCARNITINE	13.4315	344.278	344.28	C19H37NO4	Acyl carnitines	FUJLYHJROOYKRA-QGZVFWFLSA-N	CCCCCCCCCCCC(=O)O[C@H](CC(=O)[O-])C[N+](C)(C)C	5.63496	99.9	32.1457
L-Carnitine; CE0; PHIQHXFUZVPYII-ZCFIWIBFSA-N	18.0573	162.111	162.112	C7H15NO3	Carnitines	PHIQHXFUZVPYII-ZCFIWIBFSA-N	C[N+](C)(C)C[C@@H](CC(=O)[O-])O	9.06778	100	1204.25
Leucylglycine; PlaSMA ID-548	18.991	189.12	189.123	C8H16N2O3	Dipeptides	LESXFEZIFXFIQR-UHFFFAOYNA-N	O=C(O)CNC(=O)C(N)CC(C)C	15.8627	99.8	35.1926
LEVODOPA	12.3455	236.032	236.032	C9H11NO4	Tyrosine and derivatives	WTDRDQBEARUVNC-LURJTMIESA-N	O=C(O)C(N)CC1=CC=C(O)C(O)=C1	1.05918	100	21.6637
L-Glutamic acid; CE0; WHUUTDBJXJRKMK-VKHMYHEASA-N	17.0887	148.059	148.06	C5H9NO4	Glutamic acid and derivatives	WHUUTDBJXJRKMK-VKHMYHEASA-N	C(CC(=O)O)[C@@H](C(=O)O)N	13.1028	99.9	32.8953
Lichesterinic acid	13.5085	342.263	342.264	C19H32O4	Butenolides	SLQVVNFTCYVCPB-INIZCTEOSA-N	CCCCCCCCCCCCC[C@H]1C(=C(C(=O)O1)C)C(=O)O	2.60033	100	39.1448
Linoleoyl Ethanolamide	3.747	324.291	324.29	C20H37NO2	N-acylethanolamines	KQXDGUVSAAQARU-HZJYTTRNSA-N	CCCCC/C=C\C/C=C\CCCCCCCC(=O)NCCO	4.31713	100	44.7905
Linopirdine	3.69432	392.176	392.176	C26H21N3O	Indoles and derivatives	YEJCDKJIEMIWRQ-UHFFFAOYSA-N	O=C1N(C=2C=CC=CC2)C=3C=CC=CC3C1(CC=4C=CN=CC4)CC=5C=CN=CC5	1.91241	100	30.949
L-Kynurenine; CE0; YGPSJZOEDVAXAB-QMMMGPOBSA-N	19.6755	209.089	209.092	C10H12N2O3	Alkyl-phenylketones	YGPSJZOEDVAXAB-QMMMGPOBSA-N	c1ccc(c(c1)C(=O)C[C@@H](C(=O)O)N)N	15.1608	99.8	21.3113
L-methionine sulfone; CE0; UCUNFLYVYCGDHP-UHFFFAOYSA-N	9.64642	182.049	182.048	C5H11NO4S	L-alpha-amino acids	UCUNFLYVYCGDHP-UHFFFAOYSA-N	CS(=O)(=O)CCC(C(=O)O)N	6.75645	100	25.556
Lotusine	7.2928	315.178	315.18	C19H24NO3+	Benzylisoquinolines	ZKTMLINFIQCERN-QGZVFWFLSA-O	OC1=CC=C(C=C1)CC2C3=CC(OC)=C(O)C=C3CC[N+]2(C)C	5.04474	100	20.4341
L-Prolyl-L-isoleucine	19.5754	229.155	229.155	C11H20N2O3	Dipeptides	OCYROESYHWUPBP-CIUDSAMLSA-N	CC[C@H](C)[C@@H](C(=O)O)NC(=O)[C@@H]1CCCN1	0.610941	100	655.911
Lupinine	3.98513	170.152	170.154	C10H19NO	Lupinine-type alkaloids	HDVAWXXJVMJBAR-VHSXEESVSA-N	OCC1CCCN2CCCCC21	9.1094	100	34.6967
Luteolin 7-glucuronide	7.50037	463.071	463.08	C21H18O12	Flavonoid-7-O-glucuronides	VSUOKLTVXQRUSG-ZFORQUDYSA-N	O=C(O)C1OC(OC2=CC(O)=C3C(=O)C=C(OC3=C2)C=4C=CC(O)=C(O)C4)C(O)C(O)C1O	19.6294	98.4	223.607
LysoPC(0:0/18:0)	9.8993	546.353	546.353	C26H54NO7P	2-acyl-sn-glycero-3-phosphocholines	IQGPMZRCLCCXAG-RUZDIDTESA-N	CCCCCCCCCCCCCCCCCC(=O)O[C@H](CO)COP(=O)([O-])OCC[N+](C)(C)C	0.128122	100	23.4859
Malic acid	11.2666	135.03	135.03	C4H6O5	Beta hydroxy acids and derivatives	BJEPYKJPYRNKOW-UHFFFAOYSA-N	O=C(O)CC(O)C(=O)O	2.22173	100	31.4402
Melophlin B/C/G/K/L/N/O	7.406	324.254	324.253	C19H33NO3	N-alkylpyrrolidines	WBPPODSRZVXVJK-MSUUIHNZSA-N	CCCCCCCCCCCC/C(O)=C(C1=O)\C(C(N1C)C)=O	0.832682	100	22.2954
Memantine	7.6081	180.175	180.175	C12H21N	Monoalkylamines	BUGYDGFZZOZRHP-UHFFFAOYSA-N	CC12CC3CC(C)(C1)CC(N)(C3)C2	0.111003	100	22.2903
MENTHOL(-)	13.0346	174.186	174.185	C10H20O	Menthane monoterpenoids	NOOLISFMXDJSKH-UHFFFAOYSA-N	OC1CC(C)CCC1C(C)C	7.23368	100	27.3915
Metazachlor OXA	21.3277	274.123	274.119	C14H15N3O3	Alpha amino acids and derivatives	PHMHHVKFXZNTKU-UHFFFAOYSA-N	Cc1cccc(c1N(Cn2cccn2)C(=O)C(=O)O)C	14.1545	99.7	25.1665
Methacrylamide	18.192	86.0602	86.06	C4H7NO	Primary carboxylic acid amides	FQPSGWSUVKBHSU-UHFFFAOYSA-N	CC(=C)C(N)=O	1.85917	100	21.2275
Methionine conjugated chenodeoxycholic acid	12.8803	546.321	546.322	C29H49NO5S	Glycinated bile acids and derivatives	CDNGTOVFEUSMMG-AVINCHNBSA-N	C[C@H](CCC(N[C@@H](CCSC)C(O)=O)=O)[C@H]1CC[C@@]2([H])[C@]3([H])[C@H](O)C[C@]4([H])C[C@H](O)CC[C@]4(C)[C@H]3CC[C@@]21C	3.27645	99.9	47.1615
Methionine conjugated cholic acid	7.2527	562.31	562.317	C29H49NO6S	Glycinated bile acids and derivatives	VNBNDOGLQFEJKP-OPZMEAEDSA-N	C[C@H](CCC(N[C@@H](CCSC)C(O)=O)=O)[C@H]1CC[C@@]2([H])[C@]3([H])[C@H](O)C[C@]4([H])C[C@H](O)CC[C@]4(C)[C@H]3C[C@H](O)[C@@]21C	12.1995	99.1	22.1454
Methocarbamol (Robaxin)	14.6127	242.107	242.102	C11H15NO5	Anisoles	GNXFOGHNGIVQEH-UHFFFAOYSA-N	C1=CC=CC(=C1OC)OCC(O)COC(N)=O	18.2154	99.6	27.0243
Methyl cinnamate; PlaSMA ID-317	10.1975	163.072	163.074	C10H10O2	Cinnamic acid and derivatives	CCRCUPLGCSFEDV-UHFFFAOYSA-N	O=C(OC)C=CC1=CC=CC=C1	13.4294	99.9	21.8471
Methyltyrosinate	13.9012	196.096	196.097	C10H13NO3	Tyrosine and derivatives	MWZPENIJLUWBSY-VIFPVBQESA-N	O=C(OC)C(N)CC1=CC=C(O)C=C1	5.20151	100	183.286
Metolachlor morpholinone	18.5408	234.146	234.149	C14H19NO2	Phenylmorpholines	DVBDYPDVNRJKNJ-UHFFFAOYSA-N	O=C2N(c1c(cccc1C)CC)C(C)COC2	11.7447	99.8	46.7265
Metolachlor-NOA 413173	10.4171	330.104	330.101	C14H19NO6S	N-acyl-alpha amino acids	WOXWIWNBIJDJHI-JTQLQIEISA-N	CCC1=CC=CC(C)=C1N([C@@H](C)C(O)=O)C(=O)CS(O)(=O)=O	9.42137	99.8	29.248
Metoxuron	16.3446	229.076	229.074	C10H13ClN2O2	N-phenylureas	DSRNRYQBBJQVCW-UHFFFAOYSA-N	Clc1cc(ccc1OC)NC(=O)N(C)C	8.99273	99.9	28.1318
Mevalonic Acid Lactone	17.9315	148.097	148.097	C6H10O3	Delta valerolactones	JYVXNLLUYHCIIH-UHFFFAOYSA-N	O=C1OCCC(O)(C)C1	1.48551	100	5870.42
Mimosine	19.3032	216.094	216.098	C8H10N2O4	Alpha amino acids	WZNJWVWKTVETCG-UHFFFAOYSA-N	O=C(O)C(N)CN1C=CC(=O)C(O)=C1	18.4639	99.7	46.7214
Mitragynine; PlaSMA ID-2187	7.21788	399.232	399.228	C23H30N2O4	Alkaloids	LELBFTMXCIIKKX-UHFFFAOYNA-N	CCC1CN2CCC3=C(NC4=C3C(OC)=CC=C4)C2CC1C(=COC)C(=O)OC	10.9211	99.6	32.4304
MLS001332637-01!Tiamulin	8.087	494.329	494.33	C28H47NO4S	Pleuromutilin and derivatives	UURAUHCOJAIIRQ-OTIUGTKVSA-N	CCN(CC)CCSCC(=O)O[C@@H]1C[C@@](C)(C=C)[C@@H](O)[C@H](C)[C@@]2(CCC(=O)[C@H]23)CCC(C)[C@]31C	1.94202	100	73.0981
MMV007625	11.389	410.204	410.201	C22H27N5OS	Phenylpyrazoles	KOYQCCHBZCHHPZ-UHFFFAOYSA-N	O=C(NC1=CC=C(C=C1)N2N=C(C=C2C)C)C3CCN(CC=4SC(=NC4)C)CC3	8.5324	99.7	20.6342
MMV007920	8.27695	330.123	330.124	C20H15N3O2	Benzanilides	RLRSHTJBIQRNDX-UHFFFAOYSA-N	OC(=NC1=CC=C(C=C1)C2=NC=3C=CC=CC3O2)C4=CC=C(N)C=C4	3.08975	100	23.3007
MMV019993	11.3293	363.152	363.154	C17H17F3N6	Trifluoromethylbenzenes	LNPHKHANJCYWMS-JTQLQIEISA-N	FC(F)(F)C=1C=CC(=CC1)C2=CN=NC(=NC(C3=CN(N=C3C)C)C)N2	6.49862	99.9	39.0731
MMV090930	14.4326	376.048	376.042	C16H13N3O4S2	Benzothiazoles	ISNBJLXHBBZKSL-UHFFFAOYSA-N	O=C(N=C(O)C=1C=CSC1N=C(O)C2=NC=3C=CC=CC3S2)OCC	15.3706	99.3	91.975
MMV1029203	14.7823	376.122	376.123	C20H17N5OS	Pyridinylpyrimidines	RBKVRSJNDSUKEM-UHFFFAOYSA-N	OC(=NC)CNC=1N=C(N=C2SC=C(C=3C=CC=CC3)C21)C=4N=CC=CC4	1.99403	100	20.0828
MMV553002	9.59577	240.035	240.032	C10H9NO4S	Benzoxazines	DWVQVQMJQGSFRM-UHFFFAOYSA-N	O=C1OC=2C=CC=CC2N=C1CS(=O)(=O)C	12.0817	99.8	36.3755
MMV676383	10.5097	320.051	320.052	C14H13N3O2S2	Benzoxazoles	JESHPVVTRWFMBW-NSHDSACASA-N	OC(=NC1=NC=CS1)C(SC2=NC=3C=CC=CC3O2)CC	3.71814	100	25.1054
MMV676401	18.8166	309.175	309.171	C18H20N4O	Quinazolinamines	SRTQBUDNFLRBKO-UHFFFAOYSA-N	N=1C=2C=CC=CC2C(=NCC=3OC=CC3)NC1N4CCCCC4	14.5874	99.6	134.293
MMV687243	10.5265	336.025	336.023	C15H14BrNO3	3-halobenzoic acids and derivatives	SSVQZTAKKRVHAK-UHFFFAOYSA-N	BrC1=CC=C(OCCOC=2C=CC=CC2)C(=C1)C(=N)O	6.90429	99.9	20.5552
MMV687730	14.6178	385.266	385.26	C22H32N4O2	Benzimidazoles	MMGPENLTZQKVBO-UHFFFAOYSA-N	OC(=NC1=CC=2N=C(NC2C=C1N3CCCC3)C4CCCCC4)OCCCC	15.0548	99.3	134.888
MMV688703	8.30152	336.191	336.187	C21H22FN3	Phenylpyrroles	RBWNFHXBUDPAIO-UHFFFAOYSA-N	FC=1C=CC(=CC1)C=2NC(=CC2C=3C=CN=CC3)C4CCN(C)CC4	11.4817	99.7	25.3578
MMV688762	18.7886	354.197	354.196	C24H23N3	2-phenylindoles	ARLOHHNBCXKXDE-XMMPIXPASA-N	N=1C=CC=CC1C(C=2C=3C=CC=CC3NC2C=4C=CC=CC4)N5CCCC5	2.62566	100	22.2042
MMV688891	14.4546	441.995	441.99	C18H11BrF3NO4	Aromatic anilides	IGCULZQONBAMRE-UHFFFAOYSA-N	O=C1OC=2C(OC)=CC(Br)=CC2C=C1C(O)=NC3=CC=CC(=C3)C(F)(F)F	13.3035	99.3	22.1769
MMV688941	11.3064	350.168	350.175	C22H23NO3	Benzodioxoles	CQSNAAHALWCZHT-UHFFFAOYSA-N	O(C=1C=C(C=C2OCOC12)CN3CCC4(C=CC=5C=CC=CC54)CC3)C	19.3617	99.1	664.934
MMV689244	11.3681	460.138	460.14	C24H21ClF3N3O	Phenylpiperazines	OJFZYAQGMWSUID-QFIPXVFZSA-N	O=C(N1CCN(C2=CC=C(C=C2)C(F)(F)F)CC1)C(C=3C=NC=CC3)C4=CC=C(Cl)C=C4	4.78116	99.9	34.1763
myricitrin	14.4326	503.057	503.059	C21H20O12	Flavonoid-3-O-glycosides	DCYOADKBABEMIQ-OWMUPTOHSA-N	O=C1C(OC2OC(C)C(O)C(O)C2O)=C(OC=3C=C(O)C=C(O)C13)C=4C=C(O)C(O)=C(O)C4	4.21422	99.9	63.0607
Myristoyl Ethanolamide	10.5746	272.256	272.258	C16H33NO2	N-acylethanolamines	JHIXEZNTXMFXEK-UHFFFAOYSA-N	O=C(CCCCCCCCCCCCC)NCCO	7.67653	99.9	20.1423
Myxovirescin A	12.4265	624.437	624.447	C35H61NO8	Macrolides and analogues	VQWNGCSUNKJFLW-CLEPEUEQSA-N	O=C1OC(C(O)=NCC(O)CC(O)C(O)CCC(=CC=CC(CC)CCCC(=O)CCCCC(C)CC1C)COC)CCC	15.8861	98	30.4173
N-((2S,3R,4R,5S,6R)-4,5-dihydroxy-6-(hydroxymethyl)-2-((2-methyl-4-oxo-3-phenyl-4H-chromen-7-yl)oxy)tetrahydro-2H-pyran-3-yl)acetamide	3.40728	456.167	456.16	C24H25NO8	Isoflavonoid O-glycosides	NTSAVLDATFYUQZ-YFBZVTLSSA-N	O=C1C2=CC=C(OC3OC(CO)C(O)C(O)C3NC(=O)C)C=C2OC(=C1C=4C=CC=CC4)C	14.9071	99.1	40.1497
N(PAI)-METHYL-L-HISTIDINE	21.2828	170.094	170.092	C7H11N3O2	Histidine and derivatives	JDHILDINMRGULE-LURJTMIESA-N	CN1C=NC=C1C[C@@H](C(=O)O)N	6.40828	100	20.3998
N,N'-Dibutylthiourea	18.7585	189.143	189.142	C9H20N2S	Thioureas	KFFQABQEJATQAT-UHFFFAOYSA-N	CCCCNC(=S)NCCCC	7.93055	100	22.5829
N,N-Diethyl-2,4-dimethoxybenzamide	10.9941	238.145	238.144	C13H19NO3	Dimethoxybenzenes	FUTVQQSUNQOZSN-UHFFFAOYSA-N	CCN(CC)C(=O)c(c1)c(OC)cc(OC)c1	3.48529	100	47.9479
N,N-Dimethyldodecylamine N-oxide	12.5069	230.245	230.248	C14H31NO	Long-chain alkyl amine oxides	SYELZBGXAIXKHU-UHFFFAOYSA-N	CCCCCCCCCCCC[N+](C)(C)[O-]	13.6809	99.8	44.4568
N-[3-[5,17-bis[3-[acetyl(hydroxy)amino]propyl]-14-benzyl-8-(hydroxymethyl)-11-(2-methylpropyl)-3,6,9,12,15,18-hexaoxo-1,4,7,10,13,16-hexazacyclooctadec-2-yl]propyl]-N-hydroxyacetamide	3.1558	902.388	902.402	C39H61N9O13	Cyclic peptides	ZWTDABBYXDAIOL-UHFFFAOYSA-N	O=C(N(O)CCCC1N=C(O)C(N=C(O)C(N=C(O)C(N=C(O)C(N=C(O)C(N=C1O)CCCN(O)C(=O)C)CCCN(O)C(=O)C)CO)CC(C)C)CC=2C=CC=CC2)C	15.7801	98.8	41.3702
N6-Acetyl-L-lysine; CE0; DTERQYGMUDWYAZ-ZETCQYMHSA-N	18.7495	189.124	189.123	C8H16N2O3	D-alpha-amino acids	DTERQYGMUDWYAZ-ZETCQYMHSA-N	CC(=NCCCC[C@@H](C(=O)O)N)O	5.44618	100	155.499
Na,Na-Dimethylhistidine	11.0273	184.108	184.108	C8H13N3O2	Histidine and derivatives	IMOBSLOLPCWZKQ-ZETCQYMHSA-N	CN(C)[C@@H](CC1=CN=CN1)C(=O)O	1.3579	100	25.24
N-Acetylalanine	14.8536	114.055	114.055	C5H9NO3	N-acyl-alpha amino acids	KTHDTJVBEPMMGL-UHFFFAOYSA-N	CC(C(=O)O)NC(=O)C	3.0687	100	20.7638
N-Acetylarginine; CE0; SNEIUMQYRCDYCH-LURJTMIESA-N	18.642	217.127	217.13	C8H16N4O3	N-acyl-L-alpha-amino acids	SNEIUMQYRCDYCH-LURJTMIESA-N	CC(=N[C@@H](CCCNC(=N)N)C(=O)O)O	12.5271	99.8	25.5149
N-Acetylcytidine	15.069	286.099	286.103	C11H15N3O6	Pyrimidine nucleosides	NIDVTARKFBZMOT-PEBGCTIMSA-N	O=C1N=C(N=C(O)C)C=CN1C2OC(CO)C(O)C2O	14.5402	99.7	20.5559
N-ACETYL-DL-GLUTAMIC ACID	15.3096	190.071	190.071	C7H11NO5	Glutamic acid and derivatives	RFMMMVDNIPUKGG-UHFFFAOYSA-N	CC(=O)NC(CCC(=O)O)C(=O)O	2.6306	100	137.572
N-ACETYL-D-MANNOSAMINE	12.1292	244.078	244.079	C8H15NO6	N-acyl-alpha-hexosamines	OVRNDRQMDRJTHS-ZTVVOAFPSA-N	CC(=O)N[C@H]1[C@H]([C@@H]([C@H](OC1O)CO)O)O	3.52345	100	40.3003
N-Acetylgalactosamine	2.11418	260.055	260.053	C8H15NO6	N-acyl-alpha-hexosamines	OVRNDRQMDRJTHS-CBQIKETKSA-N	CC(=O)N[C@@H]1[C@H]([C@H]([C@H](O[C@@H]1O)CO)O)O	6.53713	99.9	22.509
N-Acetylglutamine	14.0635	211.068	211.069	C7H12N2O4	Glutamine and derivatives	KSMRODHGGIIXDV-YFKPBYRVSA-N	CC(=O)N[C@@H](CCC(=O)N)C(=O)O	5.7801	100	79.1871
N-ACETYL-L-LEUCINE	20.4168	174.113	174.112	C8H15NO3	Leucine and derivatives	WXNXCEHXYPACJF-ZETCQYMHSA-N	CC(C)C[C@@H](C(=O)O)NC(=O)C	3.61835	100	22.8548
N-Acetylornithine	19.2698	175.105	175.108	C7H14N2O3	N-acyl-L-alpha-amino acids	JRLGPAXAGHMNOL-LURJTMIESA-N	C/C(=N/[C@@H](CCCN)C(=O)O)/O	17.1894	99.8	27.3312
N-ACETYLPROLINE	13.1471	180.063	180.063	C7H11NO3	Proline and derivatives	GNMSLDIYJOSUSW-UHFFFAOYSA-N	CC(=O)N1CCCC1C(=O)O	1.72162	100	34.7856
Nakijiquinone P/Q	7.19887	448.284	448.285	C29H37NO3	Prenylquinones	XPBBMGKNBSHXLB-SECCUNFJSA-N	O=C1C=C(NCCC=2C=CC=CC2)C(=O)C(=C1O)CC3(C)C4C(=CCC3C)C(C)(C)CCC4	0.914598	100	62.1283
N-alpha-(tert-Butoxycarbonyl)-L-histidine	18.5408	256.126	256.129	C11H17N3O4	Histidine and derivatives	AYMLQYFMYHISQO-UHFFFAOYSA-N	CC(C)(C)OC(=O)NC(CC1=CN=CN1)C(=O)O	13.1965	99.8	36.5045
N-ALPHA-ACETYL-L-ASPARAGINE	14.2328	197.05	197.053	C6H10N2O4	Asparagine and derivatives	HXFOXFJUNFFYMO-BYPYZUCNSA-N	CC(=O)N[C@@H](CC(=O)N)C(=O)O	14.1079	99.8	64.7202
N-ALPHA-ACETYLLYSINE	18.7412	211.103	211.105	C8H16N2O3	N-acyl-alpha amino acids	VEYYWZRYIYDQJM-UHFFFAOYSA-N	CC(=O)NC(CCCCN)C(O)=O	10.5161	99.9	20.9501
N-butyl-N-(1-(cyclohexylamino)-1-oxobutan-2-yl)-4-methylpentanamide	3.82863	339.3	339.301	C20H38N2O2	N-acyl amines	SKTZFCRNZMJIPZ-UHFFFAOYSA-N	CCCCN(C(=O)CCC(C)C)C(CC)C(=O)NC1CCCCC1	1.47362	100	22.2731
NCGC00160256-01!Sparteine-15-carboxylic acid	12.626	279.207	279.207	C16H26N2O2	Sparteine, lupanine, and related alkaloids	FNCNQQDYISRCJG-GVLTWOEFSA-N	OC(=O)C1CCC[C@@H]2[C@@H]3C[C@@H](C[N@@]12)[C@@H]4CCCCN4C3	2.5071	100	20.4381
NCGC00161931-02!4-hydroxy-9-(4-hydroxy-3,5-dimethoxyphenyl)-5a,6,8a,9-tetrahydro-5H-[2]benzofuro[5,6-f][1,3]benzodioxol-8-one [IIN-based: Match]	22.4998	401.122	401.123	C21H20O8	Lignan lactones	JGGWNGRBXJWAOC-UHFFFAOYSA-N	COC1=CC(=CC(OC)=C1O)C2C3C(COC3=O)CC4=C2C=C5OCOC5=C4O	1.77003	100	71.4825
NCGC00168836-03_C20H30O4_6,18,19-Trihydroxytrachyloban-2-one	4.0766	352.245	352.248	C20H30O4	Kaurane diterpenoids	WTOYNGQRGOLPNU-UHFFFAOYSA-N	CC12CC34CC(O)C5C(C)(CC(=O)CC5(CO)CO)C3CC1C2C4	8.60189	99.8	44.0547
NCGC00169169-02![3,4,5-trihydroxy-6-(hydroxymethyl)oxan-2-yl] 3,4,5-trimethoxybenzoate	8.6948	392.156	392.155	C16H22O10	Hydrolyzable tannins	QRWNMJBTANFMHA-UHFFFAOYSA-N	COC1=CC(=CC(OC)=C1OC)C(=O)OC2OC(CO)C(O)C(O)C2O	1.98901	100	22.4051
NCGC00169833-02_C15H22O9_(1S,4aR,5S,7aS)-5-Hydroxy-7-(hydroxymethyl)-1,4a,5,7a-tetrahydrocyclopenta[c]pyran-1-yl beta-D-glucopyranoside	8.1351	329.126	329.123	C15H22O9	Iridoid O-glycosides	RJWJHRPNHPHBRN-FKVJWERZSA-N	OC[C@H]1O[C@@H](O[C@@H]2O\C=C/[C@H]3[C@H](O)\C=C(\CO)[C@@H]23)[C@H](O)[C@@H](O)[C@@H]1O	9.08475	99.8	38.7875
NCGC00169946-02!2-(1,2-dihydroxypentyl)-4-methoxy-2,3-dihydropyran-6-one [IIN-based: Match]	20.0582	248.149	248.149	C11H18O5	Dihydropyranones	YLHOHANRUSKHKO-UHFFFAOYSA-N	CCCC(O)C(O)C1CC(OC)=CC(=O)O1	0.604475	100	74.3729
NCGC00178646-02!2,4-dihydroxyheptadecyl acetate [IIN-based: Match]	3.11755	313.269	313.274	C19H38O4	Long-chain fatty alcohols	ZBVKFVTUHVIICH-UHFFFAOYSA-N	CCCCCCCCCCCCCC(O)CC(O)COC(C)=O	13.7579	99.6	24.4805
NCGC00179796-02!5-[(E)-3-hydroxy-3-methylbut-1-enyl]-2-methylcyclohex-5-ene-1,2,4-triol [IIN-based: Match]	17.9441	246.167	246.17	C12H20O4	Cyclitols and derivatives	KLZSJMCXTDLPSF-SNAWJCMRSA-N	CC(C)(O)\\C=C\\C1=CC(O)C(C)(O)CC1O	12.5117	99.8	44.0278
NCGC00179809-02_C15H22O3_2H-Cyclohepta[b]furan-2-one, 3,3a,4,7,8,8a-hexahydro-6-(3-hydroxybutyl)-7-methyl-3-methylene-	19.1335	273.146	273.146	C15H22O3	Xanthanolides	KQEADOUDJYBGFC-UHFFFAOYSA-N	CC(O)CC\C1=C\CC2C(CC1C)OC(=O)C2=C	2.26985	100	25.7198
NCGC00180137-02!(3S)-8-hydroxy-3-methyl-3,4-dihydro-2H-benzo[a]anthracene-1,7,12-trione [IIN-based on: CCMSLIB00000848009]	11.3488	635.169	635.168	C19H14O4	Angucyclines	ZAWXOCUFQSQDJS-VIFPVBQESA-N	C[C@@H]1CC(=O)C2=C3C(=O)C4=C(C(O)=CC=C4)C(=O)C3=CC=C2C1	2.582	99.9	20.3617
NCGC00180639-02!2-[[4-[4-(2,4-dimethoxy-6-methylbenzoyl)oxy-2-methyl-6-[(2S,3R,4S,5S,6R)-3,4,5-trihydroxy-6-(hydroxymethyl)oxan-2-yl]oxybenzoyl]oxy-2-hydroxy-6-methylbenzoyl]amino]propanoic acid	18.0834	730.23	730.234	C35H39NO16	Hydrolyzable tannins	URBFANMWRODMRT-QQBJTHHXSA-N	COC1=CC(OC)=C(C(=O)OC2=CC(O[C@@H]3O[C@H](CO)[C@@H](O)[C@H](O)[C@H]3O)=C(C(=O)OC4=CC(O)=C(C(=O)NC(C)C(O)=O)C(C)=C4)C(C)=C2)C(C)=C1	5.65572	99.8	29.0061
NCGC00180676-03_C20H36O3_1-Naphthalenepentanoic acid, decahydro-2-hydroxy-beta,2,5,5,8a-pentamethyl-, (betaS,1R,2R,8aS)-	7.19887	325.274	325.274	C20H36O3	Diterpenoids	KHCCSRVJJDOANA-ZOSGAXDSSA-N	C[C@@H](CC[C@H]1[C@](C)(O)CCC2C(C)(C)CCC[C@]12C)CC(O)=O	0.891557	100	28.8432
NCGC00180698-03!(2S)-2-[(1S)-1-carboxyundecyl]-5-oxooxolane-2-carboxylic acid	7.2527	329.195	329.196	C17H28O6	Tricarboxylic acids and derivatives	TUXHHVJPGQUPCF-DYVFJYSZSA-N	CCCCCCCCCC[C@H](C(O)=O)[C@@]1(CCC(=O)O1)C(O)=O	1.39734	100	51.4051
NCGC00180738-02!(E)-3-[2-[(2S,3R,4S,5S,6R)-3,4,5-trihydroxy-6-(hydroxymethyl)oxan-2-yl]oxyphenyl]prop-2-enoic acid	8.66903	344.136	344.134	C15H18O8	Phenolic glycosides	GVRIYIMNJGULCZ-ZMKUSUEASA-N	OC[C@H]1O[C@@H](OC2=C(\C=C\C(O)=O)C=CC=C2)[C@H](O)[C@@H](O)[C@@H]1O	5.23052	99.9	22.7564
NCGC00180747-02!5-[(1S,2R,4aR)-1,2,4a,5-tetramethyl-7-oxo-3,4,8,8a-tetrahydro-2H-naphthalen-1-yl]-3-methylpentanoic acid [IIN-based on: CCMSLIB00000848900]	7.69502	658.503	658.504	C20H32O3	Colensane and clerodane diterpenoids	RNWHJFUXZQBBLK-VWJHISDNSA-N	CC(CC[C@@]1(C)[C@H](C)CC[C@]2(C)C1CC(=O)C=C2C)CC(O)=O	2.2627	100	21.039
NCGC00180806-02!9-[[3-methyl-3-[(4-methyl-5-oxo-2H-furan-2-yl)methyl]oxiran-2-yl]methoxy]furo[3,2-g]chromen-7-one [IIN-based: Match]	12.1082	383.114	383.113	C21H18O7	Psoralens	CISFAPDYRQPRCZ-UHFFFAOYSA-N	CC1=CC(CC2(C)OC2COC3=C4OC(=O)C=CC4=CC5=C3OC=C5)OC1=O	3.60207	100	34.6289
NCGC00180837-02!3,8-dihydroxy-3-methyl-2,4-dihydrobenzo[a]anthracene-1,7,12-trione [IIN-based on: CCMSLIB00000847997]	9.05183	305.084	305.081	C19H14O5	Angucyclines	UGEKKXLEYACFTD-UHFFFAOYSA-N	CC1(O)CC(=O)C2=C3C(=O)C4=C(C(O)=CC=C4)C(=O)C3=CC=C2C1	11.0135	99.8	41.2305
NCGC00246242-02!4-(3-hydroxybutyl)phenol	9.31012	149.096	149.096	C10H14O2	1-hydroxy-2-unsubstituted benzenoids	SFUCGABQOMYVJW-UHFFFAOYSA-N	CC(O)CCC1=CC=C(O)C=C1	0.536567	100	27.3453
NCGC00247500-02!(2E,4E,12E)-13-(1,3-benzodioxol-5-yl)-N-(2-methylpropyl)trideca-2,4,12-trienamide	7.2527	406.239	406.235	C24H33NO3	Benzodioxoles	FPMPOFBEYSSYDQ-AUVZEZIHSA-N	CC(C)CNC(=O)\C=C\C=C\CCCCCC\C=C\C1=CC2=C(OCO2)C=C1	8.468	99.8	58.0505
NCGC00347503-02!8-[2-(3,4-dihydroxy-2,5-dimethoxyoxolan-3-yl)ethyl]-4a,7,8-trimethylspiro[2,3,5,6,7,8a-hexahydro-1H-naphthalene-4,2'-oxirane]-2,3-diol	7.19248	448.292	448.291	C22H38O8	O-glycosyl compounds	RLYPFWBODVDUHT-UHFFFAOYSA-N	COC1OC(OC)C(O)(CCC2(C)C(C)CCC3(C)C2CC(O)C(O)C34CO4)C1O	2.45377	100	46.8962
NCGC00347515-02_C20H32O4_2-Furanacetic acid, 5-ethenyltetrahydro-alpha,5-dimethyl-, (2Z)-6-hydroxy-2,6-dimethyl-2,7-octadien-1-yl ester	4.09373	354.263	354.264	C20H32O4	Fatty alcohol esters	KQTYDMMVMJEHAN-GDNBJRDFSA-N	CC(C1CCC(C)(O1)C=C)C(=O)OC\C(C)=C/CCC(C)(O)C=C	3.0768	100	29.766
NCGC00347635-02![5-acetyloxy-3-(hydroxymethyl)-2-oxo-6-propan-2-ylcyclohex-3-en-1-yl] 3-methylpentanoate	7.27303	358.223	358.222	C18H28O6	Menthane monoterpenoids	MPXXSICHRNCHHK-UHFFFAOYSA-N	CCC(C)CC(=O)OC1C(C(C)C)C(OC(C)=O)C=C(CO)C1=O	1.92618	100	22.831
NCGC00347722-02!(2Z)-2-[(E)-6-(hydroxymethyl)-2,4,8,10-tetramethyldodec-2-enylidene]-4-methylpentanedioic acid [IIN-based on: CCMSLIB00000847318]	11.8211	361.274	361.274	C23H40O5	Acyclic diterpenoids	NNPPLRJHBQPBAQ-UKRBZAIKSA-N	CCC(C)CC(C)CC(CO)CC(C)\\C=C(C)\\C=C(\\CC(C)C(O)=O)C(O)=O	0.525917	100	21.1585
NCGC00347740-02_C30H40O8_Androstan-16-one, 1,7-bis(acetyloxy)-14,15-epoxy-17-(3-furanyl)-3-hydroxy-4,4,8-trimethyl-	12.907	546.312	546.306	C30H40O8	Limonoids	LZMUZSFHEIXIJR-UHFFFAOYSA-N	CC(=O)OC1CC(O)C(C)(C)C2CC(OC(C)=O)C3(C)C(CCC4(C)C(C(=O)C5OC345)C6=COC=C6)C12C	11.6235	99.3	26.6331
NCGC00347805-02!(2E,6E)-3,7,11,15,19,23,27,31,35-nonamethylhexatriaconta-2,6,34-triene-1,10,11,15,19,23,27,31-octol [IIN-based on: CCMSLIB00000847513]	11.4437	793.591	793.595	C45H86O8	Polyprenols	MFQDKOXWQXOOAO-YAHSWYSTSA-N	CC(C)=CCCC(C)(O)CCCC(C)(O)CCCC(C)(O)CCCC(C)(O)CCCC(C)(O)CCCC(C)(O)C(O)CC\\C(C)=C\\CC\\C(C)=C\\CO	5.16636	99.7	518.912
NCGC00347853-02_C22H32O4_12-Acetoxypimara-7,15-dien-18-oic acid	10.5203	383.216	383.219	C22H32O4	Diterpenoids	TUKYTUMQZQFKNX-UHFFFAOYSA-N	CC(=O)OC1CC2\C(=C/CC3C2(C)CCCC3(C)C(O)=O)CC1(C)C=C	8.79392	99.8	21.8525
NCGC00347878-02_C24H28O13_beta-D-Glucopyranoside, 4-hydroxyphenyl 2-O-[(2S,3R,4S)-tetrahydro-3,4-dihydroxy-4-[[(4-hydroxybenzoyl)oxy]methyl]-2-furanyl]-	2.33683	547.133	547.142	C24H28O13	Phenolic glycosides	GDCHGVOUTCXBSI-JALRXJJFSA-N	OC[C@H]1O[C@@H](OC2=CC=C(O)C=C2)[C@H](O[C@@H]3OC[C@](O)(COC(=O)C4=CC=C(O)C=C4)[C@H]3O)[C@@H](O)[C@@H]1O	17.0157	98.6	24.6763
NCGC00380102-01!3-hexadecyl-4-methoxy-5-methyloxolan-2-one [IIN-based: Match]	12.5069	372.345	372.347	C22H42O3	Gamma butyrolactones	DJNFXUFERDZHCD-UHFFFAOYSA-N	CCCCCCCCCCCCCCCCC1C(OC)C(C)OC1=O	5.98903	99.9	28.955
NCGC00380162-01_C16H28O12_alpha-D-Glucopyranoside, alpha-D-glucopyranosyl, 3-(2-methylpropanoate)	13.9168	413.165	413.165	C16H28O12	O-glycosyl compounds	QVYMNCVNZVHQEC-HPBJJQKWSA-N	CC(C)C(=O)O[C@H]1[C@H](O)[C@@H](CO)O[C@H](O[C@H]2O[C@H](CO)[C@@H](O)[C@H](O)[C@H]2O)[C@@H]1O	1.06495	100	21.0397
NCGC00380191-01![(2R,3S,4S,5R,6R)-3,4,5-trihydroxy-6-[(2R,3R,4S,5S,6R)-3,4,5-trihydroxy-6-(hydroxymethyl)oxan-2-yl]oxyoxan-2-yl]methyl 7-methyloctanoate	11.887	500.271	500.27	C21H38O12	Saccharolipids	MGQMHWZXSBFPMH-PEQRZCQJSA-N	CC(C)CCCCCC(=O)OC[C@H]1O[C@H](O[C@H]2O[C@H](CO)[C@@H](O)[C@H](O)[C@H]2O)[C@H](O)[C@@H](O)[C@@H]1O	1.71907	100	173.128
NCGC00380213-01_C19H32O8_2-Butanone, 4-[3-(beta-D-glucopyranosyloxy)-4-hydroxy-2,6,6-trimethyl-1-cyclohexen-1-yl]-	7.2527	371.206	371.206	C19H32O8	Terpene glycosides	JVIDANAJZDBKRL-FJUMDGKUSA-N	CC(=O)CCC/1=C(C)/C(O[C@@H]2O[C@H](CO)[C@@H](O)[C@H](O)[C@H]2O)C(O)CC1(C)C	0.32327	100	39.5621
NCGC00380284-01!N-(5-acetamidopentyl)acetamide [IIN-based: Match]	16.5513	187.147	187.144	C9H18N2O2	Acetamides	FQKKPLXFGDCBJT-UHFFFAOYSA-N	CC(=O)NCCCCCNC(C)=O	14.9617	99.8	66.7328
NCGC00380372-01!N-[1-(4-methoxy-6-oxopyran-2-yl)-2-methylbutyl]acetamide	18.6644	271.163	271.165	C13H19NO4	Pyranones and derivatives	LFXMHSJWYXKODM-UHFFFAOYSA-N	CCC(C)C(NC(C)=O)C1=CC(OC)=CC(=O)O1	9.66201	99.9	69.2494
NCGC00380415-01!5,7-dihydroxy-2-(4-hydroxyphenyl)-3-[3,5,7-trihydroxy-2-(4-hydroxyphenyl)-3,4-dihydro-2H-chromen-8-yl]-2,3-dihydrochromen-4-one [IIN-based: Match]	15.259	562.17	562.171	C30H24O10	Biflavonoids and polyflavonoids	YHJDRJVMBSUEDI-UHFFFAOYSA-N	OC1CC2=C(O)C=C(O)C(C3C(OC4=CC(O)=CC(O)=C4C3=O)C5=CC=C(O)C=C5)=C2OC1C6=CC=C(O)C=C6	0.675951	100	25.9935
NCGC00380424-01_C10H9NO4_1,5-(Epoxymethano)cyclopenta[c]pyran-3-carboxamide, 1,4a,5,7a-tetrahydro-8-oxo-	14.3086	230.044	230.042	C10H9NO4	Delta valerolactones	NBVNAFAEYGKTPJ-UHFFFAOYSA-N	NC(=O)C/1=C/C2C3\C=C/C2C(=O)OC3O1	8.82446	99.9	99.2767
NCGC00380425-01!1-(3,5-dihydroxyphenyl)-12-hydroxytridecan-2-one	7.39475	340.254	340.248	C19H30O4	Long-chain fatty alcohols	LPIOEJKQFMDVFS-UHFFFAOYSA-N	CC(O)CCCCCCCCCC(=O)CC1=CC(O)=CC(O)=C1	17.546	99.3	20.6848
NCGC00380458-01_C30H42O10_Butanoic acid, (1R,3aR,3bS,4aR,6S,7S,7aR,8R,8aR,9aR)-1,4a,8-tris(acetyloxy)tetradecahydro-2,2,3b,6,8a-pentamethyl-4,9-dioxo-1H-cyclopent[a]-s-indacen-7-yl ester	12.1274	580.32	580.312	C30H42O10	Diterpenoids	JQCBBCVOQHOGTI-HROOPKDASA-N	CCCC(=O)O[C@H]1[C@@H](C)C[C@@]2(OC(C)=O)[C@H]1[C@@H](OC(C)=O)[C@]3(C)C(=O)[C@@H]4[C@@H](CC(C)(C)[C@@H]4OC(C)=O)[C@]3(C)C2=O	15.0781	98.9	85.8482
NCGC00380472-01!4,7,8-trimethoxy-3,5-dimethylchromen-2-one	10.4642	282.129	282.134	C14H16O5	Coumarins and derivatives	PKKTXAMCHLIVDS-UHFFFAOYSA-N	COC1=C(OC)C2=C(C(C)=C1)C(OC)=C(C)C(=O)O2	15.9853	99.6	30.5043
NCGC00380593-01_C18H26O6_2,4-Hexadienoic acid, (6E)-3,4,5,8,9,10-hexahydro-8,9-dihydroxy-2-oxo-10-propyl-2H-oxecin-3-yl ester, (2E,4E)-	10.2566	339.178	339.18	C18H26O6	Oxocins	TXPRZPDVUZCNLB-YECGNMMBSA-N	CCCC1OC(=O)C(CC\C=C\C(O)C1O)OC(=O)/C=C/C=C/C	5.04157	99.9	57.3459
NCGC00380601-01!N-[1-(4-methoxy-6-oxopyran-2-yl)-2-methylpropyl]acetamide [IIN-based: Match]	11.9864	240.121	240.123	C12H17NO4	Pyranones and derivatives	WCMUUYZSUQJWRX-UHFFFAOYSA-N	COC1=CC(=O)OC(=C1)C(NC(C)=O)C(C)C	6.37173	100	23.4526
NCGC00380619-01_C27H37NO7_Spiro[2H-furo[2,3-e]isoindole-2,1'(2'H)-naphthalene]-7(3H)-butanoic acid, 3',4',4'a,5',6,6',7',8,8',8'a-decahydro-4,6',7'-trihydroxy-2',5',5',8'a-tetramethyl-6-oxo-, (2R,2'R,6'S,7'R,8'aS)-	13.3231	510.243	510.246	C27H37NO7	Isoindolones	WENVIACWNHYPLR-KUNUJKOTSA-N	C[C@@H]1CCC2C(C)(C)[C@H](O)[C@H](O)C[C@]2(C)[C@@]13CC4=C(O3)C5=C(C=C4O)C(=O)N(CCCC(O)=O)C5	6.89863	99.8	22.4465
NCGC00380661-01_C23H36O12_	12.1487	522.256	522.255	C23H36O12	Saccharolipids	LVOGPECZHVNNHD-MDWZMJQESA-N	COC(=O)\C(C)=C\CCC(C)(OC1OC(COC(=O)CC(C)(O)CC(O)=O)C(O)C(O)C1O)C=C	3.02534	99.9	20.4478
NCGC00380669-01!2-(2,6-dimethoxy-4-prop-2-enylphenoxy)-1-(3,4,5-trimethoxyphenyl)propan-1-ol [IIN-based: Match]	11.2516	436.23	436.233	C23H30O7	Lignans, neolignans and related compounds	KKEKLEUWEJUCRA-UHFFFAOYSA-N	COC1=CC(CC=C)=CC(OC)=C1OC(C)C(O)C2=CC(OC)=C(OC)C(OC)=C2	6.80829	99.8	34.1939
NCGC00380799-01!5-[5-[5-(3,5-dihydroxydecanoyloxy)-3-hydroxydecanoyl]oxy-3-hydroxydecanoyl]oxy-3-hydroxydecanoic acid	11.527	780.551	780.547	C40H74O13	Tetracarboxylic acids and derivatives	PBYPZVMETKFGQR-UHFFFAOYSA-N	CCCCCC(O)CC(O)CC(=O)OC(CCCCC)CC(O)CC(=O)OC(CCCCC)CC(O)CC(=O)OC(CCCCC)CC(O)CC(O)=O	5.31679	99.7	24.9017
NCGC00380828-01_C20H28O3_	4.17257	334.232	334.238	C20H28O3	Diterpene lactones	AHKUFTRUMQKIPH-VQFHSHCMSA-N	C[C@]12CCC[C@]3(C)[C@H]1[C@@H](OC3=O)[C@H](O)[C@@]45C[C@@H](CC[C@@H]24)C(=C)C5	17.2632	99.3	38.5732
NCGC00380830-01!methyl 2-[(2-hydroxy-3-methylbutanoyl)amino]-3-methylbutanoate [IIN-based on: CCMSLIB00000845070]	10.8141	254.134	254.136	C11H21NO4	N-acyl-alpha amino acids and derivatives	DYTVYDVNJBXBMW-UHFFFAOYSA-N	COC(=O)C(NC(=O)C(O)C(C)C)C(C)C	10.152	99.9	23.3134
NCGC00380832-01_C18H21N3O3_2H-Pyrazino[2,1-b]quinazoline-3,6(1H,4H)-dione, 10-hydroxy-4-(1-methylethyl)-1-(2-methylpropylidene)-, (1Z,4S)-	11.3293	328.163	328.166	C18H21N3O3	Quinazolines	UVGDCLGJXMBOBD-WQLSENKSSA-N	CC(C)C=C1NC(=O)C(C(C)C)N\2C(=O)C3=CC=CC(=C3\N=C12)O	9.32456	99.8	24.8184
NCGC00380843-01!5,7-dihydroxy-2-(4-methoxyphenyl)-3-[3,5,7-trihydroxy-2-(4-hydroxyphenyl)-3,4-dihydro-2H-chromen-6-yl]-2,3-dihydrochromen-4-one	10.7078	559.152	559.16	C31H26O10	Pyranoisoflavonoids	BKPFUQLDJWNCIK-UHFFFAOYSA-N	COC1=CC=C(C=C1)C2OC3=CC(O)=CC(O)=C3C(=O)C2C4=C(O)C=C5OC(C(O)CC5=C4O)C6=CC=C(O)C=C6	14.7543	98.6	23.7025
NCGC00380916-01_C16H27NO10_	3.69432	394.174	394.171	C16H27NO10	Cyanogenic glycosides	PMWFORPJUWEXBG-BHQATCKTSA-N	CC(C)C(O[C@@H]1O[C@H](CO[C@@H]2OC[C@](O)(CO)[C@H]2O)[C@@H](O)[C@H](O)[C@H]1O)C#N	8.67644	99.8	31.7535
NCGC00380949-01_C28H42O5_3,5,9,23-Tetrahydroxy-18,22-cycloergosta-6,8(14)-dien-11-one	8.37322	441.295	441.3	C28H42O5	11-oxosteroids	MUYUFHKTKLPWIW-UHFFFAOYSA-N	CC(C)C(C)C(O)C1CC\23CC(=O)C4(O)C(=C2CCC3C1C)\C=C/C5(O)CC(O)CCC45C	12.078	99.4	27.81
NCGC00380981-01_C28H40O5_	12.3191	457.288	457.295	C28H40O5	Naphthopyrans	ASOIHOGDYISNRH-GPTGPEQGSA-N	CC(=O)O[C@H]1CC[C@@]2(C)[C@@H](CC[C@]3(C)[C@@H]2CC[C@]4(C)O\C5=C(/C[C@@H]34)C(=O)\C=C(C)/O5)C1(C)C	15.2199	99	24.0366
NCGC00381028-01!7-(1,2-dihydroxyethyl)-4,8-dihydroxy-6-methoxy-3,4-dihydro-2H-naphthalen-1-one [IIN-based: Match]	21.43	269.101	269.102	C13H16O6	Tetralins	YWEIWRDWTNXMJK-UHFFFAOYSA-N	COC1=C(C(O)CO)C(O)=C2C(=O)CCC(O)C2=C1	2.4526	100	62.2097
NCGC00381110-01!13-hydroxy-6-(1-hydroxyethyl)-3-(hydroxymethyl)-12,14-dimethyl-15-nonyl-9-propan-2-yl-1-oxa-4,7,10-triazacyclopentadecane-2,5,8,11-tetrone [IIN-based on: CCMSLIB00000846388]	13.2752	580.354	580.357	C28H51N3O8	Cyclic depsipeptides	CBEIHVWVTGRGDR-UHFFFAOYSA-N	CCCCCCCCCC1OC(=O)C(CO)NC(=O)C(NC(=O)C(NC(=O)C(C)C(O)C1C)C(C)C)C(C)O	5.01416	99.9	37.9026
NCGC00381146-01!2-[5-[2-[2-[5-(2-oxopropyl)oxolan-2-yl]propanoyloxy]butyl]oxolan-2-yl]propanoic acid [IIN-based on: CCMSLIB00000845801]	7.253	399.239	399.238	C21H34O7	Dicarboxylic acids and derivatives	XFNIQDLOQLIJTQ-UHFFFAOYSA-N	CCC(CC1CCC(O1)C(C)C(O)=O)OC(=O)C(C)C2CCC(CC(C)=O)O2	3.43154	100	24.3259
NCGC00381167-01!(E)-3-(4-hydroxy-3-methoxyphenyl)prop-2-enamide	11.6754	216.063	216.063	C10H11NO3	Hydroxycinnamic acids and derivatives	YYAJJKZSQWOLIP-HWKANZROSA-N	COC1=C(O)C=CC(\C=C\C(N)=O)=C1	0.879373	100	44.7361
NCGC00381190-01_C27H29N5O5_	17.0147	504.226	504.224	C27H29N5O5	Quinazolines	ZCTHXQVUJKDGDA-UHFFFAOYSA-N	CC(C)C1(O)NC(=O)C(CC2(O)C3NC(C)(C)C(=O)N3C4=C2C=CC=C4)N\5C(=O)C6=CC=CC=C6\N=C15	3.669	99.9	31.3615
NCGC00381199-01_C25H38O4_(3aR,5E,7S,10E,14E,16aS)-2,7-Dihydroxy-3-[(2S)-1-hydroxy-2-propanyl]-6,10,14,16a-tetramethyl-4,7,8,9,12,13,16,16a-octahydrocyclopenta[15]annulen-1(3aH)-one	7.19887	385.272	385.274	C25H38O4	Secondary alcohols	UTGBBPSEQPITLF-YBDHUMTRSA-N	C[C@H](CO)C/1=C(O)/C(=O)[C@@]2(C)C/C=C(C)/CC/C=C(C)/CC[C@H](O)/C(=C/C[C@H]12)C	3.40018	100	46.0919
NCGC00381205-01_C27H38O6_(5xi,8alpha,9xi,10alpha)-14-Acetoxy-15-{[(2Z)-2-methyl-2-butenoyl]oxy}kaur-16-en-18-oic acid	13.1463	476.307	476.301	C27H38O6	Kaurane diterpenoids	ALSZHZPQTCVXIR-DFCLNXQMSA-N	C\C=C(C)/C(=O)OC1C(=C)[C@H]2CCC3[C@]4(C)CCC[C@](C)(C4CC[C@]13C2OC(C)=O)C(O)=O	12.2612	99.3	20.22
NCGC00381255-01!8-hydroxy-3-methoxycarbonyl-2-methylidenenonanoic acid [IIN-based on: CCMSLIB00000848611]	19.8221	262.166	262.165	C12H20O5	Medium-chain hydroxy acids and derivatives	QSAIBULZNVPLAJ-UHFFFAOYSA-N	COC(=O)C(CCCCC(C)O)C(=C)C(O)=O	2.32678	100	41.0695
NCGC00381331-01_C16H26O5_Pentanoic acid, 3-methyl-, 5-hydroxy-3-(hydroxymethyl)-6-(1-methylethyl)-2-oxo-3-cyclohexen-1-yl ester	7.45355	299.185	299.185	C16H26O5	Menthane monoterpenoids	BUOADWXGPJXKRM-UHFFFAOYSA-N	CCC(C)CC(=O)OC1C(C(C)C)C(O)\C=C(CO)/C1=O	2.00545	100	28.1204
NCGC00381346-01!3-(2,4-dihydroxypentyl)-8-hydroxy-6-methoxyisochromen-1-one [IIN-based on: CCMSLIB00000847387]	10.424	317.099	317.1	C15H18O6	Isocoumarins and derivatives	CXVPYCSNJZJTRF-UHFFFAOYSA-N	COC1=CC(O)=C2C(=O)OC(CC(O)CC(C)O)=CC2=C1	0.157679	100	20.4939
NCGC00381416-01![3-methyl-1-[3-methyl-1-oxo-1-(2,3,4,5,6-pentahydroxyhexoxy)pentan-2-yl]oxy-1-oxobutan-2-yl] 2-hydroxy-3-methylpentanoate [IIN-based on: CCMSLIB00000847843]	11.7569	528.307	528.301	C23H42O12	Depsipeptides	NJYYDRBRLSOFNG-UHFFFAOYSA-N	CCC(C)C(O)C(=O)OC(C(C)C)C(=O)OC(C(C)CC)C(=O)OCC(O)C(O)C(O)C(O)CO	11.0732	99.3	35.0783
NCGC00384561-01![1,3-dihydroxy-1-(7-methoxy-2-oxochromen-6-yl)-3-methylbutan-2-yl] 3-methylbutanoate [IIN-based on: CCMSLIB00000848725]	22.5219	401.157	401.157	C20H26O7	Coumarins and derivatives	GMMHQFAVUZIMEL-UHFFFAOYSA-N	COC1=C(C=C2C=CC(=O)OC2=C1)C(O)C(OC(=O)CC(C)C)C(C)(C)O	0.324063	100	22.8846
NCGC00384607-01_C20H22O6_11-Methyl-2,7-bis(methylene)-6,12-dioxo-5,14-dioxatricyclo[9.2.1.0~4,8~]tetradec-1(13)-en-9-yl (2Z)-2-methyl-2-butenoate	3.66948	376.183	376.175	C20H22O6	Fatty acid esters	BITFKDUCQOBZDL-POHAHGRESA-N	C\C=C(C)/C(=O)OC1CC2(C)OC(=C/C2=O)/C(=C)CC3OC(=O)C(=C)C13	18.9273	99	50.1513
NCGC00384633-01_C21H24O10_(2S,3R)-3,5-Dihydroxy-2-(4-hydroxyphenyl)-3,4-dihydro-2H-chromen-7-yl beta-D-threo-hexopyranoside	11.389	459.125	459.126	C21H24O10	Flavonoid-7-O-glycosides	BUZPALUBBJZNNV-ZZIZYRMTSA-N	OC[C@H]1O[C@@H](OC2=CC(=C3C[C@@H](O)[C@@H](OC3=C2)C4=CC=C(O)C=C4)O)[C@H](O)[C@@H](O)[C@@H]1O	3.17995	100	35.4309
NCGC00384718-01_C17H18O9_2-Propenoic acid, 3-[4-(beta-D-glucopyranosyloxy)-5-benzofuranyl]-, (2E)-	10.45	384.128	384.129	C17H18O9	Phenolic glycosides	CAMYXILYLXYDFE-PJDHSCROSA-N	OC[C@H]1O[C@@H](OC2=C3C=COC3=CC=C2\C=C\C(O)=O)[C@H](O)[C@@H](O)[C@@H]1O	3.14998	100	28.3749
NCGC00384746-01!6-(2,3-dihydroxy-3-methylbutyl)-7-methoxy-3-(2-methylbut-3-en-2-yl)chromen-2-one	15.38	385.136	385.141	C20H26O5	Coumarins and derivatives	JMIHHZJRBXJKLS-UHFFFAOYSA-N	COC1=C(CC(O)C(C)(C)O)C=C2C=C(C(=O)OC2=C1)C(C)(C)C=C	13.164	99.5	21.9705
NCGC00384803-01!2,4-dihydroxy-3-[(E)-4-hydroxy-3-methyl-5-(1,2,6-trimethyl-3-oxocyclohexyl)pent-2-enyl]-6-methylbenzaldehyde	7.79525	406.26	406.259	C23H32O5	Hydroxybenzaldehydes	BQAWIDAQBDWCGH-AWNIVKPZSA-N	CC1CCC(=O)C(C)C1(C)CC(O)C(\C)=C\CC2=C(O)C(C=O)=C(C)C=C2O	2.23995	100	32.655
NCGC00384865-01!5-hydroxy-7-[4-hydroxy-2-methoxy-3-(3-methylbut-2-enyl)phenyl]-2,2-dimethyl-7,8-dihydropyrano[3,2-g]chromen-6-one [IIN-based on: CCMSLIB00000846956]	9.4089	459.177	459.178	C26H28O6	3'-prenylated isoflavanones	QJFJALJGKXGWFO-UHFFFAOYSA-N	COC1=C(C=CC(O)=C1CC=C(C)C)C2COC3=CC4=C(C=CC(C)(C)O4)C(O)=C3C2=O	2.17781	100	320.046
NCGC00384897-01_C16H20O10_3-(Benzoyloxy)-2-hydroxypropyl beta-D-glucopyranosiduronic acid	10.292	373.11	373.113	C16H20O10	O-glucuronides	DLZMKPZOEYKXHQ-MQCRQNCBSA-N	OC(CO[C@@H]1O[C@@H]([C@@H](O)[C@H](O)[C@H]1O)C(O)=O)COC(=O)C2=CC=CC=C2	8.89811	99.8	30.7959
NCGC00385023-01_C36H58O9_(1S,7S,9beta,23E)-9-Formyl-1,25-dihydroxy-10,14-dimethyl-4,9-cyclo-9,10-secocholesta-5,23-dien-7-yl beta-D-glucopyranoside	12.2591	652.455	652.442	C36H58O9	Cucurbitacins	BOHOBTRHAFBJOW-GXLHQHSHSA-N	C[C@H](C\C=C\C(C)(C)O)[C@H]1CC[C@@]2(C)[C@@H]3[C@@H](O[C@@H]4O[C@H](CO)[C@@H](O)[C@H](O)[C@H]4O)/C=C/5C(CC[C@H](O)C5(C)C)[C@@]3(CC[C@]12C)C=O	19.3274	96.9	26.6587
NCGC00385110-01_C20H38O2_(2R)-1-(5-Hydroxy-3-methylpentyl)-2,5,5,8a-tetramethyldecahydro-2-naphthalenol	7.21147	293.283	293.284	C20H38O2	Diterpenoids	MCHQEVJMCLOQAZ-AKMRJOLWSA-N	CC(CCO)CCC1[C@](C)(O)CCC2C(C)(C)CCCC12C	2.42086	100	25.8939
NCGC00385227-01_C16H24O8_beta-D-Glucopyranoside, 4-(3-hydroxypropyl)-2-methoxyphenyl	21.7745	367.135	367.136	C16H24O8	Phenolic glycosides	QFYFLJZBZITPGX-IBEHDNSVSA-N	COC1=C(O[C@@H]2O[C@H](CO)[C@@H](O)[C@H](O)[C@H]2O)C=CC(=C1)CCCO	4.76662	99.9	68.2261
NCGC00385245-01!(2E,4E,14E)-15-(1,3-benzodioxol-5-yl)-N-(2-methylpropyl)pentadeca-2,4,14-trienamide [IIN-based on: CCMSLIB00000848860]	7.23163	434.273	434.267	C26H37NO3	Benzodioxoles	DRMOIHOBUYFDKF-HMZUNPFJSA-N	CC(C)CNC(=O)\\C=C\\C=C\\CCCCCCCC\\C=C\\C1=CC2=C(OCO2)C=C1	15.0368	99.2	33.9214
NCGC00385265-01_C20H27NO11_(2S)-{[6-O-(beta-D-Glucopyranosyl)-beta-D-glucopyranosyl]oxy}(phenyl)acetonitrile	21.2057	475.193	475.192	C20H27NO11	Cyanogenic glycosides	XUCIJNAGGSZNQT-UUGBRMIUSA-N	OC[C@H]1O[C@@H](OC[C@H]2O[C@@H](O[C@H](C#N)C3=CC=CC=C3)[C@H](O)[C@@H](O)[C@@H]2O)[C@H](O)[C@@H](O)[C@@H]1O	0.778632	100	23.5115
NCGC00385336-01!(6aR,12aR)-12a-hydroxy-2,3,9-trimethoxy-6,6a-dihydrochromeno[3,4-b]chromen-12-one	15.4334	341.107	341.102	C19H18O7	Rotenones	APAWOEBSLLGWDF-IEBWSBKVSA-N	COC1=CC=C2C(=O)[C@]3(O)[C@@H](COC4=C3C=C(OC)C(OC)=C4)OC2=C1	15.0688	99.5	41.5032
NCGC00385384-01![(6R)-6-hydroxy-2-methyl-5-oxo-6-[(2S,3S,9R,13R,14S,16R)-2,3,16-trihydroxy-4,4,9,13,14-pentamethyl-11-oxo-1,2,3,7,8,10,12,15,16,17-decahydrocyclopenta[a]phenanthren-17-yl]heptan-2-yl] acetate [IIN-based: Match]	13.222	580.396	580.384	C32H50O8	Cucurbitacins	LKYNAQSYQLFTCM-KGCOOEROSA-N	CC(=O)OC(C)(C)CCC(=O)[C@](C)(O)C1[C@H](O)C[C@@]2(C)C3CC=C4C(C[C@H](O)[C@@H](O)C4(C)C)[C@]3(C)C(=O)C[C@]12C	19.6422	98.1	57.1722
NCGC00385399-01!3-hydroxy-5-methoxy-3-methoxycarbonyl-5-oxopentanoic acid	10.7076	238.091	238.092	C8H12O7	Tricarboxylic acids and derivatives	OMIHCBSQSYMFDP-UHFFFAOYSA-N	COC(=O)CC(O)(CC(O)=O)C(=O)OC	4.74606	100	37.7515
NCGC00385502-01!1-[2,4-dihydroxy-3-[(2S,3R,4R,5S,6R)-3,4,5-trihydroxy-6-(hydroxymethyl)oxan-2-yl]phenyl]-2-hydroxy-3-(4-hydroxyphenyl)propan-1-one [IIN-based: Match]	11.3488	437.145	437.144	C21H24O10	2'-Hydroxy-dihydrochalcones	CSATWRZOLKGPRW-KXIDKYMXSA-N	OC[C@H]1O[C@H]([C@H](O)[C@@H](O)[C@@H]1O)C2=C(O)C=CC(C(=O)C(O)CC3=CC=C(O)C=C3)=C2O	1.07516	100	36.5448
NCGC00385642-01!1,4-dihydroxyheptadec-16-en-2-yl acetate [IIN-based: Match]	3.13397	311.256	311.258	C19H36O4	Long-chain fatty alcohols	LUIGTZGBXWZJAX-UHFFFAOYSA-N	CC(=O)OC(CO)CC(O)CCCCCCCCCCCC=C	6.93958	99.9	25.7298
NCGC00385653-01_C36H40O8_	12.3699	618.297	618.306	C36H40O8	Jatrophane and cyclojatrophane diterpenoids	IBMKFRJIFFORNR-LAZXBOAMSA-N	CC1CC2(OC(C)=O)C(\C=C(C)/C(CC(=O)C(C)(C)/C=C/C(C)C2=O)OC(=O)C3=CC=CC=C3)C1OC(=O)C4=CC=CC=C4	14.1516	98.5	30.6377
NCGC00385659-01_C20H36O2_1-Naphthalenepentanol, decahydro-6-hydroxy-gamma,5,5,8a-tetramethyl-2-methylene-	7.43327	309.279	309.279	C20H36O2	Diterpenoids	ZORMCMFEBIUIRM-UHFFFAOYSA-N	CC(CCO)CCC1C(=C)CCC2C(C)(C)C(O)CCC12C	1.90766	100	20.4109
NCGC00385777-01_C19H32O8_(2R)-4-[(1S)-1-Hydroxy-2,6,6-trimethyl-4-oxo-2-cyclohexen-1-yl]-2-butanyl beta-D-glucopyranoside	7.2722	389.217	389.217	C19H32O8	Fatty acyl glycosides of mono- and disaccharides	CZYPGTRKJFYXLT-SUHXYMONSA-N	C[C@H](CC[C@@]1(O)\C(=C/C(=O)CC1(C)C)C)O[C@@H]2O[C@H](CO)[C@@H](O)[C@H](O)[C@H]2O	0.0513852	100	20.7943
NCGC00385844-01_C15H28O2_7-(2-Hydroxy-2-propanyl)-1,4a-dimethyldecahydro-1-naphthalenol	7.19248	223.204	223.206	C15H28O2	Eudesmane, isoeudesmane or cycloeudesmane sesquiterpenoids	LKKDASYGWYYFIK-UHFFFAOYSA-N	CC(C)(O)C1CCC2(C)CCCC(C)(O)C2C1	7.34748	99.9	22.007
NCGC00386083-01!dimethyl (2E,6E,11Z)-19-(2-amino-2-oxoethyl)-9,13-dihydroxy-8-methoxy-10,12,14-trimethyl-15-oxohenicosa-2,6,11-trienedioate [IIN-based on: CCMSLIB00000846986]	14.3086	554.34	554.332	C29H47NO9	Fatty acid methyl esters	BJMXBTRNBWZGEQ-FKYXSWMHSA-N	COC(\\C=C\\CC\\C=C\\C(=O)OC)C(O)C(C)\\C=C(\\C)C(O)C(C)C(=O)CCCC(CC(N)=O)CC(=O)OC	13.638	99.1	69.1445
N-Cyclohexylformamide	12.7371	128.105	128.107	C7H13NO	Secondary carboxylic acid amides	SWGXDLRCJNEEGZ-UHFFFAOYSA-N	OC=NC1CCCCC1	13.1921	99.9	22.1572
Nefiracetam (Translon)	11.2313	247.143	247.144	C14H18N2O2	Alpha amino acids and derivatives	NGHTXZCKLWZPGK-UHFFFAOYSA-N	C(N1C(CCC1)=O)C(NC2=C(C=CC=C2C)C)=O	2.42773	100	20.9463
NEPSILON,NEPSILON,NEPSILON-TRIMETHYLLYSINE	7.25972	189.163	189.16	C9H20N2O2	L-alpha-amino acids	MXNRLFUSFKVQSK-QMMMGPOBSA-N	C[N+](C)(C)CCCC[C@@H](C(=O)[O-])N	15.0138	99.8	20.3659
Nervonic Acid	2.02248	367.354	367.35	C24H46O2	Very long-chain fatty acids	GWHCXVQVJPWHRF-KTKRTIGZSA-N	O=C(O)CCCCCCCCCCCCCC=CCCCCCCCC	11.6782	99.6	46.2498
N-Fructosyl isoleucine	7.87003	294.152	294.155	C12H23NO7	Isoleucine and derivatives	VYGRYVGDPYFVCA-UHFFFAOYSA-N	O=C(O)C(NCC1(O)(OC(CO)C(O)C1(O)))C(C)CC	7.88701	99.9	26.0718
N-Fructosyl isoleucine; PlaSMA ID-1287	19.0002	276.145	276.144	C12H23NO7	N-Fructosyl amino acids	VYGRYVGDPYFVCA-UHFFFAOYNA-N	O=C(O)C(NCC1(O)(OC(CO)C(O)C1(O)))C(C)CC	2.17278	100	52.3667
N-Glycoloyl-neuraminate	10.6381	326.108	326.108	C11H19NO10	Neuraminic acids	FDJKUWYYUZCUJX-AJKRCSPLSA-N	OCC(=O)N[C@H]([C@@H](O)1)[C@H]([C@H](O)[C@H](O)CO)O[C@@](O)(C(O)=O)C1	0.858611	100	22.6701
NIACINAMIDE	11.5724	140.082	140.082	C6H6N2O	Nicotinamides	DFPAKSUCGFBDDF-UHFFFAOYSA-N	N=C(O)C=1C=NC=CC1	4.06905	100	74.8806
Nicotinic acid; CE0; PVNIIMVLHYAWGP-UHFFFAOYSA-N	10.9016	124.037	124.039	C6H5NO2	Pyridinecarboxylic acids	PVNIIMVLHYAWGP-UHFFFAOYSA-N	c1cc(cnc1)C(=O)O	17.8169	99.9	22.4413
N-Isovalerylglycine	19.9457	160.096	160.097	C7H13NO3	N-acyl-alpha amino acids	ZRQXMKMBBMNNQC-UHFFFAOYSA-N	O=C(O)CN=C(O)CC(C)C	5.74652	100	74.0779
N-Methyldodecylamine	12.5556	200.238	200.237	C13H29N	Dialkylamines	OMEMQVZNTDHENJ-UHFFFAOYSA-N	CCCCCCCCCCCCNC	3.64567	100	20.1545
N-Methyl-L-proline; CE0; CWLQUGTUXBXTLF-YFKPBYRVSA-N	8.40155	130.087	130.086	C6H11NO2	Proline and derivatives	CWLQUGTUXBXTLF-YFKPBYRVSA-N	CN1CCC[C@H]1C(=O)O	4.15109	100	20.6229
N-Methylthreonine	19.0398	134.079	134.081	C5H11NO3	L-alpha-amino acids	CCAIIPMIAFGKSI-DMTCNVIQSA-N	O=C(O)C(NC)C(O)C	14.0214	99.9	71.5972
NNEI 2'-naphthyl isomer 30 NCE	7.2722	357.192	357.196	C24H24N2O	Indolecarboxamides and derivatives	LKGPFICOQRIBQC-UHFFFAOYSA-N	O=C(NC1=CC(C=CC=C2)=C2C=C1)C3=CN(CCCCC)C4=C3C=CC=C4	12.7101	99.6	36.2673
N-Nitrosodibutylamine (NDBA)	17.973	159.148	159.149	C8H18N2O	Organic N-nitroso compounds	YGJHZCLPZAZIHH-UHFFFAOYSA-N	O=NN(CCCC)CCCC	8.1056	100	338.842
N-Nitrosodiethylamine (NDEA)	21.0283	103.087	103.087	C4H10N2O	Organic N-nitroso compounds	WBNQDOYYEUMPFS-UHFFFAOYSA-N	O=NN(CC)CC	4.9473	100	23.5005
N-Nitrosomorpholine	17.7454	117.065	117.066	C4H8N2O2	Morpholines	ZKXDGKXYMTYWTB-UHFFFAOYSA-N	O=NN1CCOCC1	5.63785	100	25.8743
N-Nitrosopiperazine (NPAZ)	17.796	116.082	116.082	C4H9N3O	Piperazines	CVTIZMOISGMZRJ-UHFFFAOYSA-N	O=NN1CCNCC1	5.68564	100	29.7276
N-Nitrosopiperidine (NPIP)	10.424	115.085	115.087	C5H10N2O	Nitrosopiperidines	UWSDONTXWQOZFN-UHFFFAOYSA-N	O=NN1CCCCC1	11.209	100	25.8651
N-Octyl-2-pyrrolidone	3.76645	198.184	198.185	C12H23NO	N-alkylpyrrolidines	WPPOGHDFAVQKLN-UHFFFAOYSA-N	CCCCCCCCN1CCCC1=O	8.77966	99.9	20.6759
None-AelA	13.023	480.181	480.176	C17H29N5O9S	Oligopeptides	FVOOJOUHCOIGKP-UHFFFAOYSA-N	CC(N)C(=O)NC(CCC(=O)NC(CSCC(N)C(=O)O)C(=O)NC(C)C(=O)O)C(=O)O	10.6836	99.5	21.2128
norambreinolide	8.17428	251.196	251.2	C16H26O2	Naphthofurans	IMKJGXCIJJXALX-SHUKQUCYSA-N	O=C1OC2(C)CCC3C(C)(C)CCCC3(C)C2C1	16.3217	99.7	21.8886
Nortriptyline	20.5369	264.172	264.175	C19H21N	Dibenzocycloheptenes	PHVGLTMQBUFIQQ-UHFFFAOYSA-N	CNCCC=C1C2=CC=CC=C2CCC3=CC=CC=C31	10.9019	99.8	1244.8
Noscapine	3.75938	414.154	414.155	C22H23NO7	Phthalide isoquinolines	AKNNEGZIBPJZJG-MSOLQXFVSA-N	O=C1OC(C2=CC=C(OC)C(OC)=C12)C3C4=C(OC)C=5OCOC5C=C4CCN3C	1.49703	100	22.2344
Obtucarbamate A	19.2937	239.1	239.1	C11H14N2O4	Phenylcarbamic acid esters	CNPWIVIIZHULCN-UHFFFAOYSA-N	O=C(OC)NC1=CC=C(C(=C1)NC(=O)OC)C	0.878294	100	45.4975
OCP_186.0317_15.9	12.4957	186.032	186.032	C8H8ClNO2	Alpha amino acids	NSDVLRONTCKCPY-UHFFFAOYSA-N	OC(=O)CNc1ccccc1Cl	0.913823	100	23.2686
Octopamine, N-feruloyl-	10.8821	352.121	352.12	C18H19NO5	Hydroxycinnamic acids and derivatives	VJSCHQMOTSXAKB-YCRREMRBSA-N	O=C(C=CC1=CC=C(O)C(OC)=C1)NCC(O)C2=CC=C(O)C=C2	3.69192	100	25.1731
Octylamine	13.2442	130.158	130.159	C8H19N	Monoalkylamines	IOQPZZOEVPZRBK-UHFFFAOYSA-N	CCCCCCCCN	7.14511	100	30.9126
OLEATE	7.19245	283.262	283.263	C18H34O2	Long-chain fatty acids	ZQPPMHVWECSIRJ-KTKRTIGZSA-N	CCCCCCCC/C=C\CCCCCCCC(=O)O	3.35377	100	78.8135
O-PHOSPHO-DL-SERINE	8.7862	186.018	186.016	C3H8NO6P	L-alpha-amino acids	BZQFBWGGLXLEPQ-UHFFFAOYSA-N	C(C(C(=O)O)N)OP(=O)(O)O	6.98864	100	20.5634
ORLISTAT	7.49545	518.373	518.382	C29H53NO5	Leucine and derivatives	AHLBNYSZXLDEJQ-FWEHEUNISA-N	CCCCCCCCCCC[C@@H](C[C@@H]1OC(=O)[C@H]1CCCCCC)OC(=O)[C@H](CC(C)C)NC=O	16.185	98.6	22.7373
Oseltamivir acid	18.692	285.177	285.181	C14H24N2O4	Gamma amino acids and derivatives	NENPYTRHICXVCS-YNEHKIRRSA-N	CCC(CC)OC(C=1)C(NC(C)=O)C(N)CC(C(O)=O)1	12.2028	99.8	41.9779
Oxazol	7.68452	70.0274	70.0287	C3H3NO	Oxazoles	ZCQWOFVYLHDMMC-UHFFFAOYSA-N	O1C=CN=C1	18.9922	100	23.1803
OXOPROLINE	14.1621	152.033	152.032	C5H7NO3	Alpha amino acids and derivatives	ODHCTXKNWHHXJC-UHFFFAOYSA-N	OC(=O)C1CCC(=O)N1	7.82731	100	24.3614
Oxysophocarpine	18.5572	263.168	263.17	C15H22N2O2	Matrine alkaloids	QMGGMESMCJCABO-LHDUFFHYSA-N	O=C1C=CCC2N1CC3CCC[N+]4([O-])CCCC2C34	8.7776	99.9	348.034
Paleatin A	3.40728	473.195	473.196	C29H28O6	Stilbenes	UPLFZIGBQDCELE-UHFFFAOYSA-N	COC1=CC(=CC(=C1O)O)CCC2=CC(=CC=C2)OC3=C(C=CC=C3O)CCC4=CC=C(C=C4)O	0.972113	100	40.9415
Palmitoleoyl Ethanolamide	3.82863	320.256	320.256	C18H35NO2	N-acylethanolamines	WFRLANWAASSSFV-FPLPWBNLSA-N	CCCCCC/C=C\CCCCCCCC(=O)NCCO	0.281025	100	20.577
Palmitoylcarnitine cation	12.8136	400.344	400.342	C23H45NO4	Acyl carnitines	XOMRRQXKHMYMOC-UHFFFAOYSA-N	O=C([O-])CC(OC(=O)CCCCCCCCCCCCCCC)C[N+](C)(C)C	3.67186	100	25.7345
Panthenol	18.2863	206.136	206.139	C9H19NO4	N-acyl amines	SNPLKNRPJHDVJA-ZETCQYMHSA-N	OC(=NCCCO)C(O)C(C)(C)CO	14.9899	99.8	27.7635
Pantothenic acid; CE0; GHOKWGTUZJEAQD-UHFFFAOYSA-N	17.6868	220.116	220.118	C9H17NO5	Secondary alcohols	GHOKWGTUZJEAQD-UHFFFAOYSA-N	CC(C)(CO)C(C(=NCCC(=O)O)O)O	7.95028	99.9	21.7425
Parathion-methyl	9.66567	264.008	264.009	C8H10NO5PS	Phenyl thiophosphates	RLBIQVVOMOPOHC-UHFFFAOYSA-N	COP(=S)(OC)Oc1ccc(cc1)[N+]([O-])=O	3.40897	100	24.6384
PC 16:0/24:4(5Z,8Z,11Z,14Z)	11.5026	782.571	782.569	C44H80NO8P	Phosphatidylcholines	IIZPXYDJLKNOIY-JXPKJXOSSA-N	CCCCCCCCCCCCCCCC(=O)OC[C@H](COP(=O)([O-])OCC[N+](C)(C)C)OC(=O)CCC/C=C\C/C=C\C/C=C\C/C=C\CCCCC	1.96788	100	370.137
PC(16:0/18:1(9Z))	11.6558	798.541	798.541	C42H82NO8P	Phosphatidylcholines	WTJKGGKOPKCXLL-VYOBOKEXSA-N	CCCCCCCCCCCCCCCC(=O)OC[C@H](COP(=O)([O-])OCC[N+](C)(C)C)OC(=O)CCCCCCC/C=C\CCCCCCCC	0.313071	100	25.7622
perfamine	8.26147	314.143	314.14	C18H19NO4	Furopyridines	AOCCRKXUBBAOQI-GOSISDBHSA-N	O=C1C=CC=2C(OC)=C3C=COC3=NC2C1(OC)CC=C(C)C	10.1547	99.8	63.0508
Pergolide	18.7252	315.185	315.189	C19H26N2S	Indoloquinolines	YEHCICAEULNIGD-MZMPZRCHSA-N	S(C)CC1CN(CCC)C2CC3=CNC4=CC=CC(=C43)C2C1	13.7378	99.6	20.9793
Pesticide1_Monocrotophos_C7H14NO5P_Dimethyl (2E)-4-(methylamino)-4-oxo-2-buten-2-yl phosphate	22.2419	246.052	246.05	C7H14NO5P	Dialkyl phosphates	KRTSDMXIXPKRQR-AATRIKPKSA-N	CC(=CC(=O)NC)OP(=O)(OC)OC	8.98191	99.9	20.9152
Pesticide3_Forchlorfenuron_C12H10ClN3O_Urea, N-(2-chloro-4-pyridinyl)-N'-phenyl-	14.205	248.056	248.059	C12H10ClN3O	2-halopyridines	GPXLRLUVLMHHIK-UHFFFAOYSA-N	C1=CC=C(C=C1)NC(=O)NC2=CC(=NC=C2)Cl	8.54637	99.9	39.723
Pesticide3_Pirimicarb_C11H18N4O2_2-(Dimethylamino)-5,6-dimethyl-4-pyrimidinyl dimethylcarbamate	9.78292	261.132	261.132	C11H18N4O2	Dialkylarylamines	YFGYUFNIOHWBOB-UHFFFAOYSA-N	CC1=C(N=C(N=C1OC(=O)N(C)C)N(C)C)C	2.68063	100	28.668
Pesticide4_Chlorantraniliprole_C18H14BrCl2N5O2_3-Bromo-N-[4-chloro-2-methyl-6-(methylcarbamoyl)phenyl]-1-(3-chloropyridin-2-yl)-1H-pyrazole-5-carboxamide	14.4546	503.969	503.96	C18H14BrCl2N5O2	Pyrazolylpyridines	PSOVNZZNOMJUBI-UHFFFAOYSA-N	CC1=C(C(=CC(=C1)Cl)C(=O)NC)NC(=O)C2=CC(=NN2C3=C(C=CC=N3)Cl)Br	17.0252	98.6	76.9976
Pesticide4_Cyromazine_C6H10N6_Vetrazin	10.7681	208.131	208.131	C6H10N6	N-aliphatic s-triazines	LVQDKIWDGQRHTE-UHFFFAOYSA-N	C1CC1NC2=NC(=NC(=N2)N)N	0.0960935	100	36.9977
Pesticide4_Dinotefuran_C7H14N4O3_Guanidine, N-methyl-N''-nitro-N'-[(tetrahydro-3-furanyl)methyl]-	18.8236	203.114	203.114	C7H14N4O3	Nitroguanidines	YKBZOVFACRVRJN-UHFFFAOYSA-N	O=N(=O)NC(=NC)NCC1COCC1	1.67394	100	23.3089
Pesticide4_Oxadixyl_C14H18N2O4_	9.8549	279.132	279.134	C14H18N2O4	Anilides	UWVQIROCRJWDKL-UHFFFAOYSA-N	CC1=C(C(=CC=C1)C)N(C(=O)COC)N2CCOC2=O	7.30832	99.9	81.3266
Pesticide7_Spiromesifen_C23H30O4_2-Oxo-3-(2,4,6-trimethylphenyl)-1-oxaspiro[4.4]non-3-en-4-yl 3,3-dimethylbutanoate	12.0564	388.251	388.248	C23H30O4	Fatty acid esters	GOLXNESZZPUPJE-UHFFFAOYSA-N	CC1=CC(=C(C(=C1)C)C2=C(C3(CCCC3)OC2=O)OC(=O)CC(C)(C)C)C	7.64975	99.8	20.501
Phenethylacetate	8.02542	165.088	165.091	C10H12O2	Benzene and substituted derivatives	MDHYEMXUFSJLGV-UHFFFAOYSA-N	O=C(OCCC=1C=CC=CC1)C	17.5661	99.8	20.4852
Phenylalanine conjugated chenodeoxycholic acid	13.3736	522.359	522.358	C33H49NO5	Glycinated bile acids and derivatives	CEMZGPKUKMFNNF-ZPZFIVIXSA-N	C[C@H](CCC(N[C@@H](CC1=CC=CC=C1)C(O)=O)=O)[C@H]2CC[C@@]3([H])[C@]4([H])[C@H](O)C[C@]5([H])C[C@H](O)CC[C@]5(C)[C@H]4CC[C@@]32C	2.89074	100	22.9766
PHENYLETHANOLAMINE	14.5872	138.091	138.091	C8H11NO	Aralkylamines	ULSIYEODSMZIPX-UHFFFAOYSA-N	C1=CC=C(C=C1)C(CN)O	1.01382	100	81.8517
phenylethylamide 275	3.88582	276.232	276.232	C18H29NO	N-acyl amines	XDDJYYVXLXUTSA-UHFFFAOYSA-N	O=C(CCCCCCCCC)NCCC1=CC=CC=C1	1.73767	100	21.4426
Phenylglycine; PlaSMA ID-237	21.2795	152.072	152.071	C8H9NO2	Amino acids	ZGUNAGUHMKGQNY-UHFFFAOYNA-N	O=C(O)C(N)C1=CC=CC=C1	2.63035	100	79.7527
Phosphatidylethanolamine (16:0/18:2) Abbr: PLPE	21.9066	738.514	738.504	C39H74NO8P	Phosphatidylethanolamines	HBZNVZIRJWODIB-NHCUFCNUSA-N	O=C(OCC(OC(=O)CCCCCCCC=CCC=CCCCCC)COP(=O)(O)OCCN)CCCCCCCCCCCCCCC	13.595	98	25.6562
Phosphatidylethanolamine (18:0/18:1) Abbr: SOPE	11.6971	768.553	768.551	C41H80NO8P	Phosphatidylethanolamines	JQKOHRZNEOQNJE-DJEJVYNPSA-N	O=C(OCC(OC(=O)CCCCCCCC=CCCCCCCCC)COP(=O)(O)OCCN)CCCCCCCCCCCCCCCCC	1.44428	100	22.0335
Phosphatidylethanolamine (20:1/16:1) Abbr: GPoPE	9.94285	766.531	766.536	C41H78NO8P	Phosphatidylethanolamines	VOHAPZCYHVKGHA-ZSIBMOKUSA-N	O=C(OCC(OC(=O)CCCCCCCC=CCCCCCC)COP(=O)(O)OCCN)CCCCCCCC=CCCCCCCCCCC	5.75316	99.6	59.5842
Phosphatidylethanolamine (20:3/16:0) Abbr: hLPPE	9.94285	764.523	764.52	C41H76NO8P	Phosphatidylethanolamines	CHHLANXNIQPKBE-HFZVATKISA-N	O=C(OCC(OC(=O)CCCCCCCCCCCCCCC)COP(=O)(O)OCCN)CCCCCCCCCC=CCC=CCC=CCC	3.16538	100	54.7844
Phosphatidylethanolamine (22:0/16:1) Abbr: BPoPE	11.7366	796.579	796.583	C43H84NO8P	Phosphatidylethanolamines	ZNMZYHOEYPCVMP-MITQYPHISA-N	O=C(OCC(OC(=O)CCCCCCCC=CCCCCCC)COP(=O)(O)OCCN)CCCCCCCCCCCCCCCCCCCCC	4.64484	99.9	100.186
Phosphotyrosine	21.7745	262.047	262.047	C9H12NO6P	Phenylalanine and derivatives	DCWXELXMIBXGTH-UHFFFAOYSA-N	O=C(O)C(N)CC1=CC=C(OP(=O)(O)O)C=C1	0.343449	100	228.988
Phytosphingosine-1-P	7.2722	420.249	420.249	C18H40NO6P	Phosphosphingolipids	AYGOSKULTISFCW-KZNAEPCWSA-N	CCCCCCCCCCCCCC[C@H]([C@@H]([C@@H](COP(=O)(O)O)N)O)O	2.04641	100	24.103
PIPECOLATE	18.5783	152.067	152.068	C6H11NO2	Alpha amino acids	HXEACLLIILLPRG-YFKPBYRVSA-N	OC(=O)[C@@H]1CCCCN1	5.98416	100	21.366
piperazine-2,5-dione	9.05183	137.032	137.03	C4H6N2O2	Alpha amino acids and derivatives	BXRNXXXXHLBUKK-UHFFFAOYSA-N	O=C1NCC(=O)NC1	13.8656	99.9	136.923
Pirenperone	3.68503	394.195	394.193	C23H24FN3O2	Alkyl-phenylketones	HXCNRYXBZNHDNE-UHFFFAOYSA-N	O=C1C(=C(N=C2C=CC=CN12)C)CCN3CCC(C(=O)C4=CC=C(F)C=C4)CC3	5.98692	99.9	58.9196
p-methoxycinnamic acid ethyl ester	7.38505	207.099	207.1	C12H14O3	Cinnamic acid esters	DHNGCHLFKUPGPX-RMKNXTFCSA-N	O=C(OCC)C=CC1=CC=C(OC)C=C1	2.94544	100	55.8982
Pomalidomide	9.89808	274.082	274.082	C13H11N3O4	Phthalimides	UVSMNLNDYGZFPF-UHFFFAOYSA-N	C1=CC=C2C(=C1N)C(N(C2=O)C3C(NC(CC3)=O)=O)=O	0.145942	100	26.096
Pregabalin	13.3898	182.115	182.115	C8H17NO2	Gamma amino acids and derivatives	AYXYPKUFHZROOJ-ZETCQYMHSA-N	CC(C)C[C@H](CN)CC(O)=O	0.219641	100	936.408
Prenyletin	7.38505	264.121	264.123	C14H14O4	Hydroxycoumarins	AWEFUQDNSBBNCR-UHFFFAOYSA-N	O=C1OC=2C=C(OCC=C(C)C)C(O)=CC2C=C1	7.76153	99.9	27.3772
Prespatane	7.19248	205.194	205.195	C15H24	Sesquiterpenoids	KZVOHANKAKKFOK-MTWVNVMRSA-N	C[C@H]1CC[C@@]([C@@]21[H])([H])[C@@]3(C)[C@]2([H])[C@@H](C(C)=C)CC3	5.26328	100	27.9078
Proline betaine; CE0; CMUNUTVVOOHQPW-LURJTMIESA-N	18.7992	144.103	144.102	C7H13NO2	Proline and derivatives	CMUNUTVVOOHQPW-LURJTMIESA-N	C[N+]1(C)CCC[C@H]1C(=O)[O-]	9.64595	100	9336.1
Prosulfocarb	20.9501	252.144	252.142	C14H21NOS	Benzene and substituted derivatives	NQLVQOSNDJXLKG-UHFFFAOYSA-N	CCCN(CCC)C(=O)SCc1ccccc1	8.88389	99.9	72.6498
Prulaurasin	9.42595	334.067	334.069	C14H17NO6	Cyanogenic glycosides	ZKSZEJFBGODIJW-MXNNCRBYSA-N	N#CC(OC1OC(CO)C(O)C(O)C1O)C=2C=CC=CC2	6.07659	99.9	37.8439
Purine riboside	15.5943	253.094	253.093	C10H12N4O4	Purine nucleosides	MRWXACSTFXYYMV-FDDDBJFASA-N	OC[C@@H](O1)[C@@H](O)[C@@H](O)[C@@H]1n(c2)c(n3)c(cnc3)n2	1.89654	100	50.0499
Pymetrozine-TP CGA294849	7.4852	143.054	143.056	C4H6N4O2	1,2,4-triazines	OBVMWVBNOLJKBG-UHFFFAOYSA-N	CC1=NNC(=O)N(N)C1=O	14.33	99.9	20.6897
Pyrantel; CE0; YSAUAVHXTIETRK-AATRIKPKSA-N	16.3337	207.094	207.095	C11H14N2S	Hydropyrimidines	YSAUAVHXTIETRK-AATRIKPKSA-N	CN1CCCN=C1/C=C/c1cccs1	3.18694	100	45.0462
Pyrazol	6.25117	69.0454	69.0447	C3H4N2	Pyrazoles	WTKZEGDFNFYCGP-UHFFFAOYSA-N	N1C=CC=N1	9.26935	100	33.0724
PYRIDOXAL	7.41617	190.048	190.047	C8H9NO3	Pyridoxals and derivatives	RADKZDMFGJYCBB-UHFFFAOYSA-N	CC1=C(O)C(C=O)=C(CO)C=N1	0.68404	100	65.4566
PYRIDOXINE	19.1187	187.104	187.108	C8H11NO3	Pyridoxines	LXNHXLLTXMVWPM-UHFFFAOYSA-N	OC=1C(=NC=C(C1CO)CO)C	18.7592	99.7	28.2099
Pyrimidine	7.2527	81.0435	81.0447	C4H4N2	Pyrimidines and pyrimidine derivatives	CZPWVGJYEJSRLH-UHFFFAOYSA-N	C1=CN=CN=C1	14.8066	100	52.8293
PyroglutamylIsoleucine (isomer of 1005); PlaSMA ID-1006	19.6646	243.135	243.134	C11H18N2O4	Dipeptides	MKCVLTRITQNGQI-UHFFFAOYNA-N	O=C(O)C(NC(=O)C1NC(=O)CC1)C(C)CC	1.64518	100	22.9069
Pyrrol	14.8241	68.0502	68.0495	C4H5N	Heteroaromatic compounds	KAESVJOAVNADME-UHFFFAOYSA-N	N1C=CC=C1	10.4336	100	105.327
Pyrrolidine; CE0; RWRDLPDLKQPQOW-UHFFFAOYSA-N	17.1468	72.0801	72.0808	C4H9N	Pyrrolidines	RWRDLPDLKQPQOW-UHFFFAOYSA-N	C1CCNC1	9.01766	100	33.7455
quercetin 3-O-glucuronide	2.27605	501.064	501.064	C21H18O13	Flavonoid-3-O-glucuronides	DUBCCGAQYVUYEU-ZUGPOPFOSA-N	O=C(O)C1OC(OC=2C(=O)C=3C(O)=CC(O)=CC3OC2C=4C=CC(O)=C(O)C4)C(O)C(O)C1O	0.319321	100	31.0329
Quinolinic acid	2.66022	168.029	168.029	C7H5NO4	Pyridinecarboxylic acids	GJAWHXHKYYXBSV-UHFFFAOYSA-N	O=C(O)C1=NC=CC=C1C(=O)O	1.01173	100	25.9776
Rangiformic acid	11.7176	790.56	790.567	C21H38O6	Tricarboxylic acids and derivatives	LGCPAGYPUFWEBQ-ROUUACIJSA-N	CCCCCCCCCCCCCC[C@H](C(=O)OC)[C@@H](C(=O)O)CC(=O)O	8.98089	99.6	62.5956
Ranitidine	18.6086	315.148	315.149	C13H22N4O3S	Aralkylamines	VMXUWOKSQNHOCA-UKTHLTGXSA-N	O=N(=O)C=C(NC)NCCSCC=1OC(=CC1)CN(C)C	2.95099	100	21.8257
Rhapontin	11.5955	443.128	443.13	C21H24O9	Stilbene glycosides	GKAJCVFOJGXVIA-DXKBKAGUSA-N	OC=1C=C(OC2OC(CO)C(O)C(O)C2O)C=C(C=CC3=CC=C(OC)C(O)=C3)C1	3.83635	99.9	21.573
Rhodocladonic Acid	9.8982	336.07	336.071	C15H10O8	Naphthofurans	XKWWCTISHMFHJB-UHFFFAOYSA-N	O=C1C(=O)C=2C(O)=C3C(O)=C(OC3=CC2C(O)=C1OC)C(=O)C	4.40383	100	27.0231
Riboflavol	11.8239	393.147	393.14	C17H20N4O7	Flavins	MYIDQVAFCBPUQH-UHFFFAOYSA-N	CC1=CC2=C(C=C1C)N(C3=NC(=O)N(C(=O)C3=N2)O)CC(C(C(CO)O)O)O	17.1186	99.1	30.7502
roemerine	20.5618	302.124	302.12	C18H17NO2	Aporphines	JCTYWRARKVGOBK-CQSZACIVSA-N	O1C=2C=C3C4=C(C2OC1)C5=CC=CC=C5CC4N(C)CC3	13.9018	99.6	255.315
Rosmanol	18.105	345.2	345.2	C20H26O5	Diterpene lactones	LCAZOMIGFDQMNC-FORWCCJISA-N	O=C1OC2C(O)C3=CC(=C(O)C(O)=C3C14CCCC(C)(C)C24)C(C)C	0.0289687	100	20.1069
S-((3S,10R,13R)-10,13-dimethyl-17-octyl-2,3,4,7,8,9,10,11,12,13,14,15,16,17-tetradecahydro-1H-cyclopenta[a]phenanthren-3-yl) O-(4-nitrophenyl) carbonothioate	13.2539	568.34	568.34	C34H49NO4S	Androstane steroids	DFUXHMHWOWANRY-ZNBDOVCMSA-N	O=C(OC1=CC=C(C=C1)[N+](=O)[O-])SC2CC3=CCC4C(CCC5(C)C(CCCCCCCC)CCC45)C3(C)CC2	0.299117	100	64.4489
S4:17(P3:15/F1:2)	3.15572	654.328	654.333	C29H48O15	Saccharolipids	AKPIJPQIDBGCGR-UHFFFAOYSA-N	CCCCC(=O)OC1C(CO)OC(OC2(CO)OC(CO)C(OC(C)=O)C2O)C(OC(=O)CCCC)C1OC(=O)CCCC	7.53439	99.7	87.572
S-CARBOXYMETHYL-L-CYSTEINE	7.94565	180.03	180.032	C5H9NO4S	L-cysteine-S-conjugates	GBFLZEXEOZUWRN-VKHMYHEASA-N	C([C@@H](C(=O)O)N)SCC(=O)O	13.3309	99.9	27.3518
Scopularide E	12.3549	638.439	638.449	C33H59N5O7	Cyclic depsipeptides	BVIZHARSPLOVRS-UHFFFAOYSA-N	CC(CC(CCCCCC)C)C1CC(NCC(NC(C(NC(C(NC(C(NC(C(O1)=O)C)=O)C)=O)CC(C)C)=O)C(C)C)=O)=O	15.0834	98.2	29.373
Seneciphylline	19.5005	356.142	356.14	C18H23NO5	Alkaloids and derivatives	FCEVNJIUIMLVML-QPSVUOIXSA-N	O=C1OC2CCN3CC=C(COC(=O)C(O)(C(=C)CC1=CC)C)C32	5.02611	99.9	66.1622
Serine conjugated chenodeoxycholic acid	14.3582	480.341	480.332	C27H45NO6	Glycinated bile acids and derivatives	MIGXYHMLYVAUQT-DYUDRYMLSA-N	C[C@H](CCC(N[C@@H](CO)C(O)=O)=O)[C@H]1CC[C@@]2([H])[C@]3([H])[C@H](O)C[C@]4([H])C[C@H](O)CC[C@]4(C)[C@H]3CC[C@@]21C	18.5913	98.4	20.8713
SH373-1	18.3754	374.224	374.229	C17H31N3O6	Peptides	UKFUHWPKKCYCQR-UHFFFAOYSA-N	O=C(O)C(N=C(O)C(N=C(O)CCC(N)C(=O)O)C(C)CC)CC(C)C	11.1696	99.6	50.9984
Shearinine D_130028	13.409	600.332	600.332	C37H45NO6	Naphthopyrans	DFVYLDHDFLHIAA-ROIQTPFMSA-N	CC1(C)OC(C)(C)[C@]([C@H](O)C2=C3C=C4C(C(C[C@@]5([H])[C@@]6(C)[C@]7(C)[C@@](C([C@]8(O9)CC7)=CC([C@H]9C(C)(C)O8)=O)(O)CC5)=C6N4)=C2)([H])C3=C1	0.882845	100	20.1511
Shikimic Acid	17.1764	192.084	192.087	C7H10O5	Shikimic acids and derivatves	JXOHGGNKMLTUBP-HSUXUTPPSA-N	O=C(O)C1=CC(O)C(O)C(O)C1	15.8783	99.8	25.2438
Sinomenine hydrochloride	11.3064	388.128	388.13	C19H24ClNO4	Morphinans	YMEVIMJAUHZFMW-VUIDNZEBSA-N	Cl.O=C1C(OC)=CC2C3N(C)CCC2(C4=C(O)C(OC)=CC=C4C3)C1	5.15291	99.9	31.528
SPI_270.2429_14.9	3.88582	270.242	270.243	C16H31NO2	Ketals	YYICKHZBDGQJBW-UHFFFAOYSA-N	CCCNCC1COC2(CCC(CC2)C(C)(C)C)O1	1.73918	100	41.9938
Spiroxamine	4.35383	298.272	298.274	C18H35NO2	Ketals	PUYXTUJWRLOUCW-UHFFFAOYSA-N	CCCN(CC)CC1COC2(CCC(CC2)C(C)(C)C)O1	6.87287	99.9	38.7479
stearic acid	7.21147	307.26	307.26	C18H36O2	Long-chain fatty acids	QIQXTHQIDYTFRH-UHFFFAOYSA-N	O=C(O)CCCCCCCCCCCCCCCCC	1.26928	100	21.6857
Styrene	7.47895	105.068	105.07	C8H8	Styrenes	PPBRXRYQALVLMV-UHFFFAOYSA-N	C=CC=1C=CC=CC1	15.9894	99.9	22.9277
Succinic acid	9.5252	119.035	119.034	C4H6O4	Dicarboxylic acids and derivatives	KDYFGRWQOYBRFD-UHFFFAOYSA-N	O=C(O)CCC(=O)O	13.6096	99.9	33.9353
Sucralose	21.9906	419.004	419.004	C12H19Cl3O8	C-glycosyl compounds	BAQAVOSOZGMPRM-QBMZZYIRSA-N	C([C@@H]1[C@@H]([C@@H]([C@H]([C@H](O1)O[C@]2([C@H]([C@@H]([C@H](O2)CCl)O)O)CCl)O)O)Cl)O	0.525055	100	20.384
Tanshinone IIA	7.1717	295.13	295.13	C19H18O3	Tanshinones, isotanshinones, and derivatives	HYXITZLLTYIPOF-UHFFFAOYSA-N	O=C1C(=O)C2=C(C=CC3=C2CCCC3(C)C)C=4OC=C(C14)C	1.35533	100	30.9945
Taurine	7.1315	126.022	126.022	C2H7NO3S	Organosulfonic acids	XOAAWQZATWQOTB-UHFFFAOYSA-N	C(CS(=O)(=O)O)N	0.476108	100	39.1148
TEB_M388	11.3222	388.121	388.119	C16H23ClN3O4P	Phenylbutylamines	NMJXDYGJGLTLDI-UHFFFAOYSA-N	CC(C)(C)C(CCC1=CC=C(Cl)C=C1)(CN1C=NC=N1)OP(O)(O)=O	6.33827	99.9	40.0815
Terbuthylazine-TP MT24 (LM1)	8.75028	129.039	129.041	C3H4N4O2	Triazinones	YSKUZVBSHIWEFK-UHFFFAOYSA-N	NC1=NC(O)=NC(O)=N1	13.9491	99.9	23.6875
Tetradecanoyl-L-Carnitine	13.0659	372.312	372.311	C21H41NO4	Acyl carnitines	PSHXNVGSVNEJBD-LJQANCHMSA-N	CCCCCCCCCCCCCC(=O)O[C@H](CC(=O)[O-])C[N+](C)(C)C	1.82643	100	21.477
Theophylline	12.1082	203.05	203.05	C7H8N4O2	Xanthines	ZFXYFBGIUFBOJW-UHFFFAOYSA-N	O=C1C=2NC=NC2N(C(=O)N1C)C	0.984979	100	505.197
Thiabendazole	11.7235	202.041	202.043	C10H7N3S	Benzimidazoles	WJCNZQLZVWNLKY-UHFFFAOYSA-N	N1C2=CC=CC=C2N=C1C1=CSC=N1	10.6413	99.9	22.5717
Thiacloprid	14.4326	253.033	253.031	C10H9ClN4S	2-halopyridines	HOKKPVIRMVDYPB-UHFFFAOYSA-N	Clc1ccc(CN2CCSC2=NC#N)cn1	7.46944	99.9	25.3137
Threonylleucine (isomer of 925, 926); PlaSMA ID-926	21.9075	233.148	233.149	C10H20N2O4	Dipeptides	BQBCIBCLXBKYHW-UHFFFAOYNA-N	O=C(O)C(NC(=O)C(N)C(O)C)CC(C)C	3.00238	100	72.7686
thymol	3.747	151.109	151.11	C10H14O	Aromatic monoterpenoids	MGSRCZKZVOBKFT-UHFFFAOYSA-N	OC1=CC(=CC=C1C(C)C)C	5.29416	100	20.279
THYMOQUINONE	16.5513	187.071	187.073	C10H12O2	P-benzoquinones	KEQHJBNSCLWCAE-UHFFFAOYSA-N	O=C1C=C(C(=O)C=C1C)C(C)C	10.9583	99.9	628.933
Ticlopidine	3.69432	264.059	264.061	C14H14ClNS	Thienopyridines	PHWBOXQYWZNQIN-UHFFFAOYSA-N	ClC=1C=CC=CC1CN2CC=3C=CSC3CC2	7.27105	99.9	21.8597
trans-piceid; PlaSMA ID-2144	11.3293	391.138	391.139	C20H22O8	Stilbene glycosides	HSTZMXCBWJGKHG-UHFFFAOYNA-N	OCC1OC(OC2=CC(C=CC3=CC=C(O)C=C3)=CC(O)=C2)C(O)C(O)C1O	0.84369	100	20.8157
triacanthine	19.1667	204.13	204.13	C10H13N5	6-aminopurines	BEPGTHDUUROBHM-UHFFFAOYSA-N	N1=CN=C2C1=C(N=CN2CC=C(C)C)N	1.95954	100	91.0126
Triclopyr	7.69482	255.931	255.933	C7H4Cl3NO3	Polyhalopyridines	REEQLXCGVXDJSQ-UHFFFAOYSA-N	ClC1=C(OCC(O)=O)N=C(Cl)C(Cl)=C1	6.83773	99.9	24.8504
Triethyl phosphate	8.15855	205.06	205.06	C6H15O4P	Trialkyl phosphates	DQWPFSLDHJDLRL-UHFFFAOYSA-N	CCOP(=O)(OCC)OCC	1.99941	100	37.2428
TRIGONELLINE	15.92	297.085	297.085	C7H7NO2	Alkaloids and derivatives	WWNNZCOKKKDOPX-UHFFFAOYSA-N	C[N+]1=CC(=CC=C1)C([O-])=O	2.15427	100	55.8222
trimethyl(2-{[3-[octadeca-9,12-dienoyloxy]-2-(octadecanoyloxy)propyl phosphonato]oxy}ethyl)azanium	11.4255	808.586	808.583	C44H84NO8P	Phosphatidylcholines	DZPKSVTWWIZUMS-XEYFSEMKSA-N	CCCCCCCCCCCCCCCCCC(=O)OC(COC(=O)CCCCCCCC=CCC=CCCCCC)COP(=O)([O-])OCC[N+](C)(C)C	3.95754	99.9	858.992
Trimethylamine?N-oxide	22.378	76.0744	76.0757	C3H9NO	Trialkyl amine oxides	UYPYRKYUKCHHIB-UHFFFAOYSA-N	O=N(C)(C)C	16.6939	100	280.911
Trospium	7.2722	392.225	392.222	[C25H30NO3]+	Diphenylmethanes	OYYDSUSKLWTMMQ-UHFFFAOYSA-N	OC(C(=O)OC1CC2CCC(C1)[N+]21CCCC1)(C1=CC=CC=C1)C1=CC=CC=C1	6.83286	99.9	27.2278
TRYPTOPHAN	14.1375	227.077	227.079	C11H12N2O2	Indolyl carboxylic acids and derivatives	QIVBCDIJIAJPQS-SECBINFHSA-N	N[C@H](CC1=CNC2=CC=CC=C12)C(O)=O	9.24788	99.9	31.4006
Tyramine; PlaSMA ID-59	7.98457	121.064	121.064	C8H11NO	Amino acids	DZGWFCGJZKJUFP-UHFFFAOYSA-N	OC1=CC=C(C=C1)CCN	1.65201	100	21.4014
Uracil; CE0; ISAKRJDGNUQOIC-UHFFFAOYSA-N	8.10613	113.034	113.035	C4H4N2O2	Pyrimidones	ISAKRJDGNUQOIC-UHFFFAOYSA-N	c1cnc(nc1O)O	8.40451	100	37.7028
Ursocholanic Acid	3.64328	378.335	378.337	C24H40O2	Bile acids, alcohols and derivatives	RPKLZQLYODPWTM-LVVAJZGHSA-N	O=C(O)CCC(C)C1CCC2C3CCC4CCCCC4(C)C3CCC12C	4.14974	99.9	24.7002
ursodeoxycholic acid	7.19887	431.26	431.256	C24H40O4	Dihydroxy bile acids, alcohols and derivatives	RUDATBOHQWOJDD-GDLHFPCISA-N	C[C@H](CCC(=O)O)[C@H]1CC[C@@H]2[C@@]1(CC[C@H]3[C@H]2[C@H](C[C@H]4[C@@]3(CC[C@H](C4)O)C)O)C	8.57959	99.7	22.7215
Uvarigrin	3.75938	609.518	609.51	C37H68O6	Annonaceous acetogenins	ADPAPZVYVYEBGS-UHFFFAOYSA-N	O=C1OC(C=C1CCCCCCCCCCCCC(O)CC(O)C2OC(CC2)C(O)CCCCCCCCCCCC)C	12.6167	98.8	37.7529
Valaciclovir	10.1552	325.161	325.162	C13H20N6O4	Alpha amino acid esters	HDOVUKNUBWVHOX-QMMMGPOBSA-N	O=C(OCCOCN1C=NC=2C(O)=NC(=N)NC21)C(N)C(C)C	1.75297	100	20.8193
veratramine	12.6223	432.277	432.28	C27H39NO2	Fluorenes	MALFODICFSIXPO-AZAJSESZSA-N	OC1CC2=CCC3C4=CC=C(C(=C4CC3C2(C)CC1)C)C(C)C5NCC(C)CC5O	6.24595	99.9	20.798
Xefoampeptide D	14.3841	468.341	468.343	C25H45N3O5	Cyclic depsipeptides	VYFBCKJPZMCFAW-LSNYBQGISA-N	O=C1NC(C(C)(C)C)C(OC(CCCC)CC(N[C@H](CC(C)C)C(N[C@H]1CC(C)C)=O)=O)=O	4.27037	99.9	23.6494
Yersiniabactin	11.3488	482.124	482.124	C21H27N3O4S3	Alpha amino acids and derivatives	JHYVWAMMAMCUIR-VQNLDRKJSA-N	CC1(CSC(=N1)C(C)(C)C(C2CSC(N2)C3CSC(=N3)C4=CC=CC=C4O)O)C(=O)O	1.12004	100	118.229
Zacopride	18.0172	310.135	310.132	C15H20ClN3O2	Aminophenyl ethers	FEROPKNOYKURCJ-UHFFFAOYSA-N	ClC1=CC(C(O)=NC2CN3CCC2CC3)=C(OC)C=C1N	11.6725	99.7	120.337
Zeatin	12.8058	242.101	242.101	C10H13N5O	6-alkylaminopurines	UZKQTCBAMSWPJD-FARCUNLSSA-N	OCC(=CCNC=1N=CNC2=NC=NC21)C	0.289135	100	31.2806
