# Supplementary material for: Untargeted mass spectrometry to investigate ocean acidification in Cancer borealis using optimized metabolite extraction methods
Source: Royal Society of Chemistry journal article supplement (doi:10.1039/d5an00788g), 2026-01-01
Supplement: d5an00788g7.xlsx [file d5an00788g7.xlsx]

## Sheet: AcMeOH OA
Table S6. The complete list of detected metabolites in AcMeOH OA 4 hours group.
Title	RT (min)	Precursor m/z	Reference m/z	Formula	Ontology	InChIKey	SMILES	mass error	Total score	S/N
(1S,3R,6S,6aR,6bR,8S,9S,11R,11aR,12R,12aR,14R)-1-ethyl-6,8,11-trihydroxy-3-methyl-10-methylenetetradecahydro-3,6a,12-(epiethane[1,1,2]triyl)-9,11a-methanoazuleno[2,1-b]azocine 1-oxide	3.42057	376.257	376.25	C22H33NO4	Kaurane diterpenoids	DEMQJEXKIJFBRD-HQOPBMQXSA-N	[O-][N+]1(CC)CC2(C)CCC(O)C34C2CC(C31)C56CC(C(=C)C5O)C(O)CC64	17.8073	67.2	137.544
(9Z,12Z)-9,12-octadecadienoic acid	7.23247	281.249	281.25	C18H32O2	Lineolic acids and derivatives	OYHQOLUKZRVURQ-HZJYTTRNSA-N	O=C(O)CCCCCCCC=CCC=CCCCCC	4.97778	64.3	33.9101
?-linolenic acid	3.86593	279.231	279.232	C18H30O2	Lineolic acids and derivatives	DTOSIQBPPRVQHS-PDBXOOCHSA-N	CC/C=C\C/C=C\C/C=C\CCCCCCCC(=O)O	4.44075	56.4	71.917
1,3-Diphenylguanidine	12.4778	212.119	212.118	C13H13N3	Benzene and substituted derivatives	OWRCNXZUPFZXOS-UHFFFAOYSA-N	N=C(NC1=CC=CC=C1)NC1=CC=CC=C1	3.15862	72.1	6.1461
10-Shogaol	7.87377	333.242	333.24	C21H32O3	Shogaols	FADFGCOCHHNRHF-VAWYXSNFSA-N	O=C(C=CCCCCCCCCC)CCC1=CC=C(O)C(OC)=C1	5.43152	52.9	62.7405
17-Hydroxyisolathyrol	18.556	373.204	373.2	C20H30O5	Diterpenoids	XKXYJTIBKZGIPR-GLPNUTAPSA-N	O=C1C(=CC2C(CC=C(CO)C(O)C3C(O)C(C)CC13O)C2(C)C)C	9.61951	62.3	16.2946
1-Methylguanosine	9.91288	298.11	298.115	C11H15N5O5	Purine nucleosides	UTAIYTHAJQNQDW-KQYNXXCUSA-N	O=C1C=2N=CN(C2NC(=N)N1C)C3OC(CO)C(O)C3O	15.3968	63.2	18.7323
2-(4-oxoquinazolin-3(4H)-yl)ethyl isobutyrate	9.84275	261.132	261.13	C14H16N2O3	Quinazolines	DXZNCVRUZDRWLR-UHFFFAOYSA-N	O=C(OCCN1C=NC=2C=CC=CC2C1=O)C(C)C	5.74427	65.6	17.7014
2`-O-Methylguanosine	9.93407	298.11	298.115	C11H15N5O5	Purine nucleosides	OVYNGSFVYRPRCG-KQYNXXCUSA-N	CO[C@@H]1[C@@H]([C@H](O[C@H]1n2cnc3c2nc([nH]c3=O)N)CO)O	15.3968	80.6	50.07
2'-Deoxycytidine	22.0626	228.099	228.098	C9H13N3O4	Pyrimidine 2'-deoxyribonucleosides	CKTSBUTUHBMZGZ-SHYZEUOFSA-N	OC[C@@H](O1)[C@@H](O)C[C@@H]1N(C=2)C(=O)N=C(N)C2	4.86633	57.4	26.0785
2'-O-Methylcytidine	10.5987	258.109	258.108	C10H15N3O5	Pyrimidine nucleosides	RFCQJGFZUQFYRF-ZOQUXTDFSA-N	N=C1N=C(O)N(C=C1)C2OC(CO)C(O)C2OC	1.70471	77.3	23.3785
3-hydroxy-C14 homoserine lactone	7.56088	328.244	328.248	C18H33NO4	N-acyl-alpha amino acids and derivatives	IKQUESGRCDRZTI-UHFFFAOYSA-N	CCCCCCCCCCCC(O)CC(=O)NC1CCOC1=O	11.668	51.8	12.7147
4-((9S)-3,5,14-trihydroxy-10-((E)-((1-hydroxybutan-2-yl)imino)methyl)-13-methylhexadecahydro-1H-cyclopenta[a]phenanthren-17-yl)furan-2(5H)-one	13.1112	476.307	476.3	C27H41NO6	Cardenolides and derivatives	ASLHXRONSASUAK-FNNAZMBNSA-N	O=C1OCC(=C1)C2CCC3(O)C4CCC5(O)CC(O)CCC5(C=NC(CO)CC)C4CCC23C	13.6679	55.4	28.5173
4'-Demethylepipodophyllotoxin	21.757	401.122	401.124	C21H20O8	Podophyllotoxins	YVCVYCSAAZQOJI-JHQYFNNDSA-N	O=C1OCC2C(O)C3=CC=4OCOC4C=C3C(C5=CC(OC)=C(O)C(OC)=C5)C12	3.96386	53.1	143.548
4'-Demethylpodophyllotoxin	21.7377	401.122	401.124	C21H20O8	Podophyllotoxins	YVCVYCSAAZQOJI-BTINSWFASA-N	O=C1OCC2C(O)C3=CC=4OCOC4C=C3C(C5=CC(OC)=C(O)C(OC)=C5)C12	3.96386	50.2	161.989
9,13-epoxy-3,15,16,18-labdanetetrol	7.88393	379.255	379.25	C20H36O5	Diterpenoids	XYPPDQHBNJURHU-PDEMJFSWSA-N	OCCC1(OC2(CC1)C(C)CCC3C(C)(CO)C(O)CCC32C)CO	12.1292	62.3	7.85534
Alpha Cyperone	19.8819	241.151	241.15	C15H22O	Eudesmane, isoeudesmane or cycloeudesmane sesquiterpenoids	KUFXJZXMWHNCEH-DOMZBBRYSA-N	O=C1C(=C2CC(C(=C)C)CCC2(C)CC1)C	3.35891	68.8	519.328
Angelol A	10.209	399.142	399.142	C20H24O7	Coumarins and derivatives	GFMYIOGFYYHKLA-PWZGUCPHSA-N	O=C1OC=2C=C(OC)C(=CC2C=C1)C(O)C(OC(=O)C(=CC)C)C(O)(C)C	0.250537	73	8.23978
Benzalkonium chloride (C12)	12.0184	304.296	304.3	[C21H38N]+	Phenylmethylamines	CYDRXTMLKJDRQH-UHFFFAOYSA-N	C[N+](CCCCCCCCCCCC)(Cc1ccccc1)C	13.0463	63.6	45.57
brucine	9.3255	395.189	395.19	C23H26N2O4	Strychnos alkaloids	RRKTZKIUPZVBMF-IBTVXLQLSA-N	O=C1N2C3=CC(OC)=C(OC)C=C3C45CCN6CC7=CCOC(C1)C(C7CC64)C25	3.28956	68.5	10.1641
Bufalin	9.2647	409.227	409.23	C24H34O4	Bufanolides and derivatives	QEEBRPGZBVVINN-BMPKRDENSA-N	O=C1OC=C(C=C1)C2CCC3(O)C4CCC5CC(O)CCC5(C)C4CCC23C	7.35528	62	11.8356
Bufexamac	7.3912	224.129	224.128	C12H17NO3	Phenylacetamides	MXJWRABVEGLYDG-UHFFFAOYSA-N	CCCCOC1=CC=C(C=C1)CC(=O)NO	3.0786	53	79.2818
Butylphthalyl butylglycolate	22.3019	337.16	337.165	C18H24O6	Benzoic acid esters	GOJCZVPJCKEBQV-UHFFFAOYSA-N	CCCCOC(=O)COC(=O)C1=CC=CC=C1C(=O)OCCCC	14.0881	54.9	13.9825
C14-homoserine lactone	4.20357	312.25	312.253	C18H33NO3	N-acyl-alpha amino acids and derivatives	ZQAYHOXXVBVXPZ-UHFFFAOYSA-N	CCCCCCCCCCCCCC(=O)NC1CCOC1=O	12.2657	50.2	64.1906
Citicoline	19.1001	489.114	489.115	C14H26N4O11P2	Pyrimidine ribonucleoside diphosphates	RZZPDXZPRHQOCG-UHFFFAOYSA-N	C[N+](C)(C)CCOP([O-])(=O)OP(O)(=O)OCC1OC(C(O)C1O)N1C=CC(N)=NC1=O	1.81961	87.3	109.696
Cucurbitacin D	1.81498	539.295	539.29	C30H44O7	Cucurbitacins	SRPHMISUTWFFKJ-QJNWWGCFSA-N	O=C(C=CC(O)(C)C)C(O)(C)C1C(O)CC2(C)C3CC=C4C(CC(O)C(=O)C4(C)C)C3(C(=O)CC12C)C	9.67939	61.9	14.7714
Cytidine-5'-diphosphocholine sodium salt dihydrate, from yeast, solid	19.1116	489.114	489.115	C14H26N4O11P2	Pyrimidine ribonucleoside diphosphates	RZZPDXZPRHQOCG-OJAKKHQRSA-N	C[N+](C)(C)CCOP(=O)([O-])OP(=O)(O)OCC1C(C(C(O1)N2C=CC(=NC2=O)N)O)O	1.81961	84	45.5504
Dauricine	13.984	625.314	625.32	C38H44N2O6	Benzylisoquinolines	AQASRZOCERRGBL-ROJLCIKYSA-N	OC1=CC=C(C=C1OC2=CC=C(C=C2)CC3C4=CC(OC)=C(OC)C=C4CCN3C)CC5C6=CC(OC)=C(OC)C=C6CCN5C	9.45116	70.2	10.1203
Decanoyl-L-Carnitine	13.9918	316.246	316.248	C17H33NO4	Acyl carnitines	LZOSYCMHQXPBFU-UHFFFAOYSA-N	CCCCCCCCCC(=O)OC(CC(=O)[O-])C[N+](C)(C)C	6.1028	74.9	36.1046
Denatonium_TP222	13.8338	222.147	222.149	[C13H20NO2]+	Alpha amino acids	FCPJMWRSLGIKTQ-UHFFFAOYSA-O	CC[N+](CC)(CC(O)=O)CC1=CC=CC=C1	10.5785	54.5	23.3229
Dihydrocapsaicin	4.36053	308.217	308.222	C18H29NO3	Methoxyphenols	XJQPQKLURWNAAH-UHFFFAOYSA-N	CC(C)CCCCCCC(=O)NCC1=CC(=C(C=C1)O)OC	15.6381	55.8	27.6493
Dodemorph	3.62325	282.275	282.279	C18H35NO	Morpholines	JMXKCYUTURMERF-UHFFFAOYSA-N	CC1CN(CC(C)O1)C1CCCCCCCCCCC1	14.6663	52.3	400.129
Drofenine	3.86593	318.239	318.243	C20H31NO2	Benzene and substituted derivatives	AGJBLWCLQCKRJP-UHFFFAOYSA-N	[H]c(c([H])2)c([H])c([H])c(c([H])2)C([H])(C(=O)OC([H])([H])C([H])([H])N(C([H])([H])C([H])([H])[H])C([H])([H])C([H])([H])[H])C([H])(C([H])([H])1)C([H])([H])C([H])([H])C([H])([H])C([H])([H])1	12.789	69.8	84.1671
Erucamide	3.59227	338.341	338.342	C22H43NO	Fatty amides	UAUDZVJPLUQNMU-KTKRTIGZSA-N	NC(=O)CCCCCCCCCCC/C=C\CCCCCCCC	2.4827	54.9	45.902
FLU_310.1415_14.5	18.0498	310.135	310.141	C17H18F3NO	Trifluoromethylbenzenes	RTHCYVBBDHJXIQ-UHFFFAOYSA-N	CNCCC(OC1=CC=C(C=C1)C(F)(F)F)C1=CC=CC=C1	19.4427	55.2	48.1808
Gallocatechin	18.9929	329.057	329.06	C15H14O7	Epigallocatechins	XMOCLSLCDHWDHP-SWLSCSKDSA-N	OC=1C=C(O)C2=C(OC(C3=CC(O)=C(O)C(O)=C3)C(O)C2)C1	9.72467	61.9	230.033
Glycerophosphocholine	20.7805	258.109	258.11	C8H20NO6P	Glycerophosphocholines	SUHOQUVVVLNYQR-MRVPVSSYSA-N	C[N+](C)(C)CCOP(=O)([O-])OC[C@@H](CO)O	4.68792	81.9	310.332
GUANOSINE	11.478	306.08	306.081	C10H13N5O5	Purine nucleosides	NYHBQMYGNKIUIF-UUOKFMHZSA-N	NC1=NC2=C(N=CN2[C@@H]2O[C@H](CO)[C@@H](O)[C@H]2O)C(=O)N1	2.28698	66.8	110.478
Helenine	18.4489	255.131	255.13	C15H20O2	Eudesmanolides, secoeudesmanolides, and derivatives	PXOYOCNNSUAQNS-AGNJHWRGSA-N	O=C1OC2CC3(C(=CC2C1=C)C(C)CCC3)C	5.87936	54.7	16.0766
Hexanoyl-L-Carnitine	17.1307	260.184	260.186	C13H25NO4	Acyl carnitines	VVPRQWTYSNDTEA-LLVKDONJSA-N	CCCCCC(=O)O[C@H](CC(=O)[O-])C[N+](C)(C)C	7.45621	65.7	9.66209
Hoshinolactam	4.37742	308.223	308.222	C18H29NO3	Carbocyclic fatty acids	BBMBCHAXOBFQPC-IBGZMIKNSA-N	CCC[C@@H]1[C@@H](/C=C/C(O[C@@H]2[C@@H](C)C(N[C@H]2CC(C)C)=O)=O)C1	4.15285	55.3	53.7677
hypocrellin A	1.99295	547.157	547.16	C30H26O10	Perylenequinones	BQJKVFXDDMQLBE-RNAHPLFWSA-N	O=C1C(OC)=C2C=3C=4C1=C(O)C=C(OC)C4C=5C(OC)=CC(O)=C6C(=O)C(OC)=C(C3C65)C(C(=O)C)C(O)(C)C2	4.87974	54.8	7.09312
Isoshaftoside	19.0522	565.148	565.15	C26H28O14	Flavonoid 8-C-glycosides	OVMFOVNOXASTPA-SDSMHRFWSA-N	O=C1C=C(OC2=C1C(O)=C(C(O)=C2C3OC(CO)C(O)C(O)C3O)C4OCC(O)C(O)C4O)C=5C=CC(O)=CC5	3.75122	53.9	53.3743
Lauramidopropyl betaine	12.2195	343.292	343.296	[C19H39N2O3]+	Alpha amino acids	MRUAUOIMASANKQ-UHFFFAOYSA-O	CCCCCCCCCCCC(=O)NCCC[N+](C)(C)CC(O)=O	9.99139	89.3	565.824
Laurocapram	3.6337	282.275	282.279	C18H35NO	Caprolactams	AXTGDCSMTYGJND-UHFFFAOYSA-N	CCCCCCCCCCCCN1CCCCCC1=O	14.6663	68.3	483.606
Macamide B	12.1832	346.311	346.31	C23H39NO	N-acyl amines	MLGPKWUKOQAAGI-UHFFFAOYSA-N	O=C(NCC=1C=CC=CC1)CCCCCCCCCCCCCCC	2.88759	65.7	14.7179
Methylophiopogonanone A	15.3895	365.101	365.1	C19H18O6	Homoisoflavanones	BXTNNJIQILYHJB-GFCCVEGCSA-N	O=C1C=2C(O)=C(C(O)=C(C2OCC1CC3=CC=C4OCOC4=C3)C)C	1.616	82.7	29.9593
Myristamidopropyl betaine	11.9246	371.327	371.327	[C21H43N2O3]+	Alpha amino acids	QGCUAFIULMNFPJ-UHFFFAOYSA-O	CCCCCCCCCCCCCC(=O)NCCC[N+](C)(C)CC(O)=O	0.0269305	87.4	200.481
N,N-Dimethyltetradecylamine-N-oxide	12.0471	258.276	258.279	C16H35NO	Long-chain alkyl amine oxides	ONHFWHCMZAJCFB-UHFFFAOYSA-N	CCCCCCCCCCCCCC[N+](C)(C)[O-]	10.9959	52.5	18.3611
N,O-Didesmethylvenlafaxine	9.5361	250.178	250.18	C15H23NO2	Cyclohexanols	MMSWXJSQCAEDLK-UHFFFAOYSA-N	OC2(C(c1ccc(O)cc1)CNC)CCCCC2	7.03493	52.2	6.80158
N-Benzyladenine	12.3315	226.104	226.109	C12H11N5	6-alkylaminopurines	NWBJYWHLCVSVIJ-UHFFFAOYSA-N	C(NC1=C2N=CN=C2N=CN1)C1=CC=CC=C1	19.5481	59.5	30.6031
N-Carbobenzyloxyleucine	10.6488	266.135	266.139	C14H19NO4	Leucine and derivatives	USPFMEKVPDBMCG-LBPRGKRZSA-N	O=C(O)C(N=C(O)OCC=1C=CC=CC1)CC(C)C	14.917	57.2	8.53049
NCGC00385962-01_C16H24O3_	19.5502	247.165	247.169	C16H24O3	Macrolides and analogues	IKJZVOVTPXBUBG-QVWJMUBJSA-N	CC1C\C=C\C=C/CCCCC(O)C\C=C\C(=O)O1	15.981	74.7	11.9506
Octanoyl-L-Carnitine	15.0238	288.213	288.217	C15H29NO4	Acyl carnitines	CXTATJFJDMJMIY-CYBMUJFWSA-N	CCCCCCCC(=O)O[C@H](CC(=O)[O-])C[N+](C)(C)C	15.0928	64.9	8.34522
Oroxylin A	10.9147	307.053	307.05	C16H12O5	6-O-methylated flavonoids	LKOJGSWUMISDOF-UHFFFAOYSA-N	O=C1C=C(OC2=CC(O)=C(OC)C(O)=C12)C=3C=CC=CC3	11.1057	51.9	13.4742
Palmitoleoyl Ethanolamide	4.36053	298.272	298.274	C18H35NO2	N-acylethanolamines	WFRLANWAASSSFV-FPLPWBNLSA-N	CCCCCC/C=C\CCCCCCCC(NCCO)=O	6.87287	65.5	70.6198
Palmitoyl-L-Carnitine	12.3861	400.344	400.342	C23H45NO4	Acyl carnitines	XOMRRQXKHMYMOC-OAQYLSRUSA-N	CCCCCCCCCCCCCCCC(=O)O[C@H](CC(=O)[O-])C[N+](C)(C)C	3.67186	56.5	59.7912
Propionylcarnitine	19.5955	218.136	218.139	C10H19NO4	Acyl carnitines	UFAHZIUFPNSHSL-UHFFFAOYSA-N	O=C([O-])CC(OC(=O)CC)C[N+](C)(C)C	10.4979	75.6	376.622
Putative (3-hydroxyhexadecanoyl)glycine (aka Commendamide)	4.3835	330.262	330.264	C18H35NO4	N-acyl-alpha amino acids	MZUHHHSFDVDBCZ-UHFFFAOYSA-N	OC(CNC(CC(O)CCCCCCCCCCCCC)=O)=O	7.23664	51.2	29.0211
Rehmannioside A	1.99773	547.157	547.16	C21H32O15	O-glycosyl compounds	DTNSOISBYQKHCS-PHLAQERCSA-N	OCC1OC(OCC2OC(OC3OC=CC4C(O)C5OC5(CO)C34)C(O)C(O)C2O)C(O)C(O)C1O	4.87974	56.9	5.75685
Seconeokadsuranic acid A	18.4415	491.306	491.31	C30H44O4	Diterpenoids	GXLUGCOZQDLXAJ-KEBDBYFISA-N	O=C(O)C(=CCCC(C)C1C(=C)C2C=C3C(CCC(C(=C)C)C3(C)CCC(=O)O)C2(C)CC1)C	8.54857	55.9	152.379
Shanzhiside methylester	21.7582	429.134	429.13	C17H26O11	Iridoid O-glycosides	KKSYAZCUYVRKML-IRDZEPHTSA-N	O=C(OC)C1=COC(OC2OC(CO)C(O)C(O)C2O)C3C1C(O)CC3(O)C	9.08816	58.8	54.0987
TAG(50:1)	3.10728	850.78	850.786	C53H100O6	Triacylglycerols	FDCOHGHEADZEGF-QPLCGJKRSA-N	CCCCCCCCCCCCCCCC(=O)OCC(COC(=O)CCCCCCCCCCCCCCC)OC(=O)CCCCCCC/C=C\CCCCCCCC	6.38233	86.9	108.471
Thalsimine	3.15907	637.299	637.291	C38H40N2O7	Tannins	YWNUNVSMOKMJMG-LJAQVGFWSA-N	COC1=C2OC3=CC=C(CC4=NCCC5=CC(OC)=C(OC6=C(OC)C(OC)=C(OC)C7=C6[C@H](CC(C=C1)=C2)N(C)CC7)C=C45)C=C3	12.1922	61.8	108.555
TREHALOSE	15.3834	365.101	365.105	C12H22O11	O-glycosyl compounds	HDTRYLNUVZCQOY-LIZSDCNHSA-N	OC[C@H]1O[C@H](O[C@H]2O[C@H](CO)[C@@H](O)[C@H](O)[C@H]2O)[C@H](O)[C@@H](O)[C@@H]1O	13.2564	80.3	25.2214
Triacylglycerol 16:0-18:1-18:1	3.10728	876.795	876.801	C55H102O6	Triacylglycerols	GVEDTRDLMYCMDC-QEEMTAIZSA-N	C(=CCCCCCCCCCCCCC)CCC(=O)OC(COC(CCC=CCCCCCCCCCCCCC)=O)COC(=O)CCCCCCCCCCCCCCC	7.01413	82.6	53.5974
(3R,5R,7R,8S,9S,10S,12S,13R,14S,17R)-17-((R)-7-hydroxy-6-(hydroxymethyl)heptan-2-yl)-10,13-dimethylhexadecahydro-1H-cyclopenta[a]phenanthrene-3,7,12-triol	4.44222	435.353	435.347	C27H48O5	Tetrahydroxy bile acids, alcohols and derivatives	JNMALBXXJSWZQY-JOICSPLZSA-N	C[C@@H]([C@H]1CC[C@]2([H])[C@]1(C)[C@@H](O)C[C@@]3([H])[C@]2([H])[C@H](O)C[C@]4([H])[C@]3(C)CC[C@@H](O)C4)CCCC(CO)CO	12.8863	99.4	20.7116
(R)-4-((8S,9S,10R,13R,14S,17R)-10,13-dimethyl-3-oxo-2,3,6,7,8,9,10,11,12,13,14,15,16,17-tetradecahydro-1H-cyclopenta[a]phenanthren-17-yl)pentanoic acid	4.3777	337.255	337.253	C24H36O3	Bile acids, alcohols and derivatives	WCFIGQHNBJXROP-IHMUCKAYSA-N	C[C@@H]([C@H]1CC[C@]2([H])[C@]1(C)CC[C@@]3([H])[C@@]2([H])CCC([C@]3(C)CC4)=CC4=O)CCC(O)=O	8.62855	99.8	25.3983
2-((4R)-4-((3R,5R,9S,10S,12S,13R,14S,17R)-12-hydroxy-10,13-dimethyl-3-(sulfooxy)hexadecahydro-1H-cyclopenta[a]phenanthren-17-yl)pentanamido)ethane-1-sulfonic acid	8.40228	562.245	562.25	C26H45NO9S2	Taurinated bile acids and derivatives	UCVGCHGIKFWAGH-FCAUSNKHSA-N	[H][C@@]12CC[C@@H]3C[C@H](OS(=O)(O)=O)CC[C@]3(C)[C@H]1C[C@H](O)[C@@]4(C)[C@H]2CC[C@@H]4[C@@H](CCC(NCCS(=O)(O)=O)=O)C	10.1556	99.3	30.7128
2-((4R)-4-((3R,5R,9S,10S,13R,14S,17R)-3-hydroxy-10,13-dimethylhexadecahydro-1H-cyclopenta[a]phenanthren-17-yl)-N-methylpentanamido)ethane-1-sulfonic acid	16.6536	520.305	520.307	C27H47NO5S	Taurinated bile acids and derivatives	MFDHSRQWKNAICJ-JSZKKBQESA-N	[H][C@@]12CC[C@]3([H])C[C@H](O)CC[C@]3(C)[C@H]1CC[C@@]4(C)[C@H]2CC[C@@H]4[C@@H](CCC(N(C)CCS(=O)(O)=O)=O)C	3.4595	99.9	63.718
(-)-Nuciferine	10.5861	296.17	296.165	C19H21NO2	Aporphines	ORJVQPIHKOARKV-OAHLLOKOSA-N	CN1CCc2cc(c(c-3c2[C@H]1Cc4c3cccc4)OC)OC	17.8279	99.5	32.3238
(1R,2R,4aS,8aS)-1-((S)-3-hydroxy-3-methylpentyl)-2,5,5,8a-tetramethyldecahydronaphthalen-2-ol	6.9272	311.293	311.29	C20H38O2	Diterpenoids	VWPNQCLIQCRCCG-HHUCQEJWSA-N	OC(C)(CC)CCC1C(O)(C)CCC2C(C)(C)CCCC12C	8.32022	99.9	24.3389
(1R,3aR,5aR,5bR,9S,11aR)-3a,5a,5b,8,8,11a-hexamethyl-1-prop-1-en-2-yl-1,2,3,4,5,6,7,7a,9,10,11,11b,12,13,13a,13b-hexadecahydrocyclopenta[a]chrysen-9-ol	4.398	449.373	449.375	C30H50O	Triterpenoids	MQYXUWHLBZFQQO-KIIHVYTKSA-N	OC1CCC2(C)C(CCC3(C)C2CCC4C5C(C(=C)C)CCC5(C)CCC43C)C1(C)C	4.22809	99.9	43.9152
(2E,4E)-N-(2-methylpropyl)-6-thiophen-2-ylhexa-2,4-dienamide	7.71528	272.107	272.108	C14H19NOS	N-acyl amines	KNGBXFMEGLRFHV-PRKJJMSOSA-N	OC(=NCC(C)C)C=CC=CCC=1SC=CC1	2.35201	100	33.5673
(2E,4E)-N-(2-methylpropyl)dodeca-2,4-dienamide	3.99375	274.214	274.214	C16H29NO	N-acyl amines	BBRMJCAPNGJKEM-AQASXUMVSA-N	OC(=NCC(C)C)C=CC=CCCCCCCC	1.31284	100	23.2811
(2E,4E,8E)-7,13-dihydroxy-4,8,12-trimethyltetradeca-2,4,8-trienoic acid	14.0926	314.229	314.233	C17H28O4	Sesquiterpenoids	RCKDDMWGRIYLCN-WRHFRISWSA-N	O=C(O)C=CC(=CCC(O)C(=CCCC(C)C(O)C)C)C	10.0881	99.8	64.9036
(2R)-6-methylpiperidine-2-carboxylic acid	20.8938	144.099	144.1	C7H13NO2	L-alpha-amino acids	IHLDCUQUFBWSJU-PRJDIBJQSA-N	O=C(O)C1NC(C)CCC1	5.6211	100	459.158
(2R,3R)-3,5,7-trihydroxy-2-(3,4,5-trihydroxyphenyl)chroman-4-one	9.07392	321.059	321.06	C15H12O8	Epigallocatechins	KJXSIXMJHKAJOD-LSDHHAIUSA-N	O=C1C=2C(O)=CC(O)=CC2OC(C3=CC(O)=C(O)C(O)=C3)C1O	4.36056	100	31.6162
(2S,4aS,6aS,6bR,12aS,14bR)-2,4a,6a,6b,9,9,12a-heptamethyl-10,13-dioxo-1,2,3,4,4a,5,6,6a,6b,7,8,8a,9,10,11,12,12a,12b,13,14b-icosahydropicene-2-carboxylic acid	18.4264	491.306	491.31	C30H44O4	Triterpenoids	QGWDYPREORDRIT-OHHDNCQJSA-N	O=C(O)C1(C)CCC2(C)CCC3(C(=CC(=O)C4C5(C)CCC(=O)C(C)(C)C5CCC43C)C2C1)C	8.54857	99.7	327.533
(2Z)-2-[(E)-6-(hydroxymethyl)-2,4,8,10-tetramethyldodec-2-enylidene]-4-methylpentanedioic acid	21.1271	435.251	435.251	C23H40O5	Acyclic diterpenoids	NNPPLRJHBQPBAQ-UKRBZAIKSA-N	O=C(O)C(=CC(=CC(C)CC(CO)CC(C)CC(C)CC)C)CC(C(=O)O)C	0.620332	100	84.1423
(4-methylcyclohex-3-ene-1,1-diyl)dimethanol	7.20948	157.121	157.12	C9H16O2	Primary alcohols	JTRLVVUONAUOHI-UHFFFAOYSA-N	OCC1(CO)CC=C(C)CC1	5.09165	100	22.6877
(4-oxido-2,3,5,6,7,8-hexahydro-1H-pyrrolizin-4-ium-1-yl)methyl 2,3-dihydroxy-3-methylpentanoate	18.7674	305.206	305.207	C14H25NO5	Pyrrolizidines	QWYNXLBAFAPSKQ-UHFFFAOYSA-N	O=C(OCC1CCN2(=O)CCCC12)C(O)C(O)(C)CC	4.88193	100	78.9049
(dehydrohexadecanoyl)glycine - Commendamide analogue	3.86593	312.25	312.253	C18H33NO3	N-acyl-alpha amino acids	XPLOWAHHERZGRC-CCEZHUSRSA-N	O=C(C=CCCCCCCCCCCCCC)NCC(=O)O	12.2657	99.7	56.4908
(E)-4-(4-methoxybenzylidene)-3-phenylisoxazol-5(4H)-one	17.5582	302.076	302.08	C17H13NO3	Anisoles	HGIIHVJCDPYWBJ-RVDMUPIBSA-N	O=C1ON=C(C=2C=CC=CC2)C1=CC3=CC=C(OC)C=C3	13.5395	99.7	21.6747
(E)-5-(1,2,4a,5-tetramethyl-7-oxo-3,4,8,8a-tetrahydro-2H-naphthalen-1-yl)-3-methylpent-2-enoic acid	14.0743	357.185	357.183	C20H30O3	Colensane and clerodane diterpenoids	SLMFLTPPPXRYHP-JLHYYAGUSA-N	O=C(O)C=C(C)CCC1(C)C(C)CCC2(C(=CC(=O)CC21)C)C	6.57927	99.9	136.346
(E)-N-butyl-N-(1-(cyclohexylamino)-1-oxobutan-2-yl)but-2-enamide	18.8233	309.249	309.254	C18H32N2O2	N-acyl amines	CMQOSWNHMUHIJJ-VZUCSPMQSA-N	C/C=C/C(=O)N(CCCC)C(CC)C(=O)NC1CCCCC1	15.7153	99.5	32.5877
(NAG)(anNAM)-AqKAA[3-NH2-GGGG]	15.2097	588.77	588.773	C47H77N13O22	Polypeptides	NKPYYNVJGCWBCQ-UHFFFAOYSA-N	CC(=O)NC1C(OC2C3COC(O3)C(NC(C)=O)C2OC(C)C(=O)NC(C)C(=O)NC(CCC(=O)NC(CCCCNC(=O)CNC(=O)CNC(=O)CNC(=O)CN)C(=O)NC(C)C(=O)NC(C)C(=O)O)C(N)=O)OC(CO)C(O)C1O	4.382	99.9	50.2107
(NAG)(NAM)-AqKA[3-NH2-GGSGG]	15.8727	605.784	605.775	C47H79N13O24	Polypeptides	VCYLOYMVPCIDQK-UHFFFAOYSA-N	CC(=O)NC1C(OC2C(CO)OC(O)C(NC(C)=O)C2OC(C)C(=O)NC(C)C(=O)NC(CCC(=O)NC(CCCCNC(=O)CNC(=O)CNC(=O)C(CO)NC(=O)CNC(=O)CN)C(=O)NC(C)C(=O)O)C(N)=O)OC(CO)C(O)C1O	14.1472	98.5	21.4039
(NAG)(NAM)-AqO[3-NH2-SATA]	15.1397	570.769	570.767	C45H77N11O23	Polypeptides	RJEWWYYIWMKCHB-UHFFFAOYSA-N	CC(=O)NC1C(OC2C(CO)OC(O)C(NC(C)=O)C2OC(C)C(=O)NC(C)C(=O)NC(CCC(=O)NC(CCCNC(=O)C(CO)NC(=O)C(C)NC(=O)C(NC(=O)C(C)N)C(C)O)C(=O)O)C(N)=O)OC(CO)C(O)C1O	4.25743	99.9	23.8525
(S)-MALATE	9.9374	152.054	152.055	C4H6O5	Beta hydroxy acids and derivatives	BJEPYKJPYRNKOW-REOHCLBHSA-N	C([C@@H](C(=O)O)O)C(=O)O	6.18196	100	81.052
(Z)-pregna-4,17(20)-diene-3,16-dione	13.9978	335.204	335.2	C21H28O2	Androgens and derivatives	WDXRGPWQVHZTQJ-RHIZAWHPSA-N	O=C1C=C2CCC3C4CC(=O)C(=CC)C4(C)CCC3C2(C)CC1	12.7983	99.6	68.0575
[(2R,3R,4R,5R)-2-(2,4-dioxopyrimidin-1-yl)-4-hydroxy-5-(hydroxymethyl)oxolan-3-yl] 4-hydroxy-2-methoxy-6-methylbenzoate	1.78167	426.152	426.151	C18H20N2O9	Pyrimidine nucleosides	RARUJUZFKGDIOM-RAEVTNRLSA-N	O=C(OC1C(O)C(OC1N2C=CC(O)=NC2=O)CO)C=3C(OC)=CC(O)=CC3C	4.22386	99.9	20.6572
[(2R,3S,4S,5R,6R)-6-[(2S,3S,4S,5R)-3,4-dihydroxy-2,5-bis(hydroxymethyl)oxolan-2-yl]oxy-3,4,5-trihydroxyoxan-2-yl]methyl (E)-3-(4-hydroxy-3,5-dimethoxyphenyl)prop-2-enoate	8.281	549.183	549.181	C23H32O15	Coumaric acids and derivatives	DJBWDHVUJCXYBH-IBVGEFGBSA-N	O=C(OCC1OC(OC2(OC(CO)C(O)C2O)CO)C(O)C(O)C1O)C=CC3=CC(OC)=C(O)C(OC)=C3	2.18507	100	26.1255
[(2R,4S,5R)-5-ethenyl-1-azabicyclo[2.2.2]octan-2-yl]-(6-methoxyquinolin-4-yl)methanol	7.44643	342.224	342.218	C20H24N2O2	Cinchona alkaloids	LOUPRKONTZGTKE-USWSZDBUSA-N	OC(C=1C=CN=C2C=CC(OC)=CC21)C3N4CCC(C3)C(C=C)C4	19.8996	99.1	21.4842
[3,4,5-trihydroxy-6-(3,4,5-trihydroxybenzoyl)oxyoxan-2-yl]methyl 3,4,5-trihydroxybenzoate	14.5714	523.042	523.048	C20H20O14	Tannins	LYGRISUQIZNHGM-UHFFFAOYSA-N	O=C(OCC1OC(OC(=O)C2=CC(O)=C(O)C(O)=C2)C(O)C(O)C1O)C3=CC(O)=C(O)C(O)=C3	11.5859	99.3	440.067
1-(3-(Trifluoromethyl)phenyl)piperazine	16.0855	231.11	231.11	C11H13F3N2	Phenylpiperazines	KKIMDKMETPPURN-UHFFFAOYSA-N	c1c(C(F)(F)F)cccc1N1CCNCC1	1.60097	100	44.8884
1-(4-fluorophenyl)isoquinoline	13.8407	224.087	224.087	C15H10FN	Phenylpyridines	JGQQLQAYZXPOJS-UHFFFAOYSA-N	FC(C=C1)=CC=C1C2=NC=CC3=CC=CC=C32	0.847885	100	22.3497
1-(hexadecanoyloxy)-3-hydroxypropan-2-yl-octadec-9-enoate	11.6623	612.558	612.556	C37H70O5	1,2-diacylglycerols	YEJYLHKQOBOSCP-ISLYRVAYSA-N	CCCCCCCCCCCCCCCC(=O)OCC(CO)OC(=O)CCCCCCCC=CCCCCCCCC	2.36713	100	22.94
1COOH-2But-A7EO1	19.1272	205.144	205.143	C10H20O4	Medium-chain fatty acids	CEHZMLXJTDNURC-UHFFFAOYSA-N	OCCOCC(CCCC)CC(=O)O	3.75347	100	81.2713
1-Cyclohexylpyrrolidin-2-one	8.97462	168.137	168.138	C10H17NO	N-alkylpyrrolidines	PZYDAVFRVJXFHS-UHFFFAOYSA-N	O=C1CCCN1C1CCCCC1	5.88801	100	22.2955
1-Dodecyl-2-pyrrolidinone	7.27713	254.25	254.248	C16H31NO	N-alkylpyrrolidines	NJPQAIBZIHNJDO-UHFFFAOYSA-N	CCCCCCCCCCCCN1CCCC1=O	8.45632	99.9	51.1686
1-Pentanone, 3-hydroxy-1,5-diphenyl-	18.4489	277.116	277.12	C17H18O2	Alkyl-phenylketones	QJUWGGININGVSC-UHFFFAOYSA-N	O=C(C=1C=CC=CC1)CC(O)CCC=2C=CC=CC2	14.795	99.7	50.765
1-PHENYLETHANOL	1.94382	123.079	123.08	C8H10O	Benzene and substituted derivatives	WAPNOHKVXSQRPX-UHFFFAOYSA-N	CC(O)C1=CC=CC=C1	8.44976	100	26.1889
2-(2,4-dioxo-3,4-dihydropyrimidin-1(2H)-yl)acetic acid	20.366	193.019	193.02	C6H6N2O4	Alpha amino acids and derivatives	ZFNQFXDDQAEAFI-UHFFFAOYSA-N	O=C1C=CN(C(=O)N1)CC(=O)O	6.21697	100	28.7564
2-(4-aminotetrahydro-2H-pyran-4-yl)acetic acid	14.6622	182.077	182.08	C7H13NO3	Pyranoid amino acids and derivatives	QRIAWCUEIMQLGG-UHFFFAOYSA-N	O=C(O)CC1(N)CCOCC1	13.7302	99.9	29.4352
2-(N-butylpropionamido)-N-cyclohexylbutanamide	3.86593	297.259	297.254	C17H32N2O2	Tertiary carboxylic acid amides	QMXGNDITXNMQEK-UHFFFAOYSA-N	CCCCN(C(=O)CC)C(CC)C(=O)NC1CCCCC1	17.628	99.5	349.405
2,2'-(3-Chlorophenylimino)diethanol	19.9565	216.079	216.079	C10H14ClNO2	Dialkylarylamines	MVQUJEUCFOGFJU-UHFFFAOYSA-N	OCCN(CCO)C1=CC(Cl)=CC=C1	0.0925589	100	22.9796
2,2,6,6-Tetramethyl-4 piperidone	9.97357	156.138	156.138	C9H17NO	Piperidinones	JWUXJYZVKZKLTJ-UHFFFAOYSA-N	CC1(C)CC(=O)CC(C)(C)N1	0.0640458	100	22.8651
2,2-dimethyl-5-oxotetrahydrofuran-3-carboxylic acid	18.038	181.057	181.06	C7H10O4	Gamma butyrolactones	UZBOWOQARWWIER-UHFFFAOYSA-N	O=C(O)C1CC(=O)OC1(C)C	16.0168	99.8	63.4622
2,3-Dihydroxypyridine; CE0; GGOZGYRTNQBSSA-UHFFFAOYSA-N	14.764	112.038	112.039	C5H5NO2	Pyridinones	GGOZGYRTNQBSSA-UHFFFAOYSA-N	c1cc(c(nc1)O)O	7.22961	100	24.8513
2,3-Diphosphoglycerate	12.2574	266.963	266.967	C3H8O10P2	Sugar acids and derivatives	XOHUEYCVLUUEJJ-UWTATZPHSA-N	OC(=O)[C@@H](COP(O)(O)=O)OP(O)(O)=O	14.0467	99.7	22.7846
2,5-Dimethoxy-4-chloroaniline	12.3299	188.051	188.047	C8H10ClNO2	Dimethoxybenzenes	YGUFQYGSBVXPMC-UHFFFAOYSA-N	COC1=CC(N)=C(OC)C=C1Cl	19.7291	99.7	24.3716
2,6-diaminopimelic acid; CE0; GMKMEZVLHJARHF-UHFFFAOYSA-N	17.8254	191.103	191.103	C7H14N2O4	Alpha amino acids	GMKMEZVLHJARHF-UHFFFAOYSA-N	C(CC(C(=O)O)N)CC(C(=O)O)N	0.261639	100	751.402
2,6-Xylidine	4.45173	122.095	122.096	C8H11N	m-Xylenes	UFFBMTHBGFGIHF-UHFFFAOYSA-N	CC1=CC=CC(C)=C1N	14.1691	99.9	31.6291
2-[5-(2-hydroxypropyl)oxolan-2-yl]propanoic acid_major	17.8254	220.152	220.154	C10H18O4	Oxolanes	IVOODSRSVJPWLY-UHFFFAOYSA-N	CC(O)CC1CCC(C(C)C(=O)O)O1	9.2208	99.9	27.5279
2-amino-4-hydroxypyrimidine-5-carboxylic acid	20.0386	156.038	156.04	C5H5N3O3	Pyrimidinecarboxylic acids	GBADBFAXAWZGHM-UHFFFAOYSA-N	O=C(O)C1=CN=C(N=C1O)N	10.1897	100	66.1428
2-Amino-5-methylbenzenesulfonic acid	16.5783	188.037	188.038	C7H9NO3S	Benzenesulfonic acids and derivatives	LTPSRQRIPCVMKQ-UHFFFAOYSA-N	CC1=CC=C(N)C(=C1)S(O)(=O)=O	4.78628	100	28.5292
2-Aminoethylphosphonic acid	20.0146	126.03	126.031	C2H8NO3P	Organic phosphonic acids	QQVDJLLNRSOCEL-UHFFFAOYSA-N	O=P(O)(O)CCN	13.1713	99.9	36.8171
2-chloro-4-fluoro-N-[(E)-2-phenylethenyl]sulfonylbenzamide	21.2569	340.024	340.021	C15H11ClFNO3S	4-halobenzoic acids and derivatives	AUMLVMKWJGCERZ-CMDGGOBGSA-N	O=C(NS(=O)(=O)/C=C/c1ccccc1)c1ccc(F)cc1Cl	9.08769	99.8	135.155
2'-Deoxyinosine-5'-monophosphate	19.5955	333.058	333.059	C10H13N4O7P	Purine 2'-deoxyribonucleoside monophosphates	PHNGFPPXDJJADG-RRKCRQDMSA-N	OC(C1)C(COP(O)(O)=O)OC1n(c3)c(N2)c(n3)C(=O)N=C2	4.65382	100	23.7009
2-Guanidinobenzimidazole	17.4687	176.09	176.093	C8H9N5	Benzimidazoles	JJWCTKUQWXYIIU-UHFFFAOYSA-N	C1=CC=C2C(=C1)NC(=N2)N=C(N)N	18.0586	99.8	97.076
2-hydroxy-1,2,3-propanetricarboxylic acid	20.8347	193.038	193.04	C6H8O7	Tricarboxylic acids and derivatives	KRKNYBCHXYNGOX-UHFFFAOYSA-N	O=C(O)CC(O)(C(=O)O)CC(=O)O	9.79072	99.9	33.4824
2-hydroxy-4-methyl-3H-benzo[e][1,4]diazepin-5(4H)-one	20.0699	191.074	191.072	C10H10N2O2	1,4-benzodiazepines	ZVHUQIMPAVOVTR-UHFFFAOYSA-N	O=C1C=2C=CC=CC2N=C(O)CN1C	9.89156	99.9	91.2265
2-Hydroxy-4-methylpentanoic acid	9.84853	133.083	133.086	C6H12O3	Hydroxy fatty acids	LVRFTAZAXQPQHI-UHFFFAOYSA-N	O=C(O)C(O)CC(C)C	18.1837	99.9	25.762
2-Methyl-1,2,3,4-tetrahydro-beta-carboline	16.0538	187.123	187.123	C12H14N2	Beta carbolines	JOFKCNJIUXPJAC-UHFFFAOYSA-N	CN1CCC2=C(C1)NC3=CC=CC=C23	1.22914	100	119.756
2-methyl-4-(pyridin-2-yl)but-3-yn-2-ol	21.2323	184.071	184.07	C10H11NO	Pyridines and derivatives	YBUWIVMOMHEALF-UHFFFAOYSA-N	OC(C#CC1=NC=CC=C1)(C)C	3.2053	100	358.563
2'-N-denrthyl-N-3'-methylaplysinopsin	20.8742	228.078	228.077	C12H9N3O2	Hydantoins	WJZHVBZSCOLDKV-YHYXMXQVSA-N	OC1=N/C(=C\c2c[nH]c3ccccc23)C(O)=N1	5.48061	100	20.7665
3-(2-amino-2-oxoethyl)-5-methyl-hexanoic acid	11.0843	210.11	210.11	C9H17NO3	Medium-chain fatty acids	NPDKTSLVWGFPQG-UHFFFAOYSA-N	NC(CC(CC(C)C)CC(O)=O)=O	0.761506	100	414.582
3-(3,5-dimethyl-7-oxo-7H-furo[3,2-g]chromen-6-yl)-N-(2-fluorophenyl)propanamide	22.2198	402.104	402.11	C22H18FNO4	Psoralens	WGJRLHFGQWIIHP-UHFFFAOYSA-N	O=C1OC=2C=C3OC=C(C3=CC2C(=C1CCC(=O)NC=4C=CC=CC4F)C)C	14.6477	99.3	64.9127
3,4-di-O-galloylquinic acid	3.42805	535.044	535.048	C21H20O14	Quinic acids and derivatives	SKUCQDOSGKINGP-YQMRLJPGSA-N	O=C(O)C1(O)CC(O)C(OC(=O)C2=CC(O)=C(O)C(O)=C2)C(OC(=O)C3=CC(O)=C(O)C(O)=C3)C1	8.52259	99.6	39.653
3`-Aminoacetophenone	15.2386	136.074	136.076	C8H9NO	Alkyl-phenylketones	CKQHAYFOPRIUOM-UHFFFAOYSA-N	CC(=O)C1=CC(N)=CC=C1	13.8158	99.9	28.5405
3Beta-Hydroxy-23,24-Bisnorchol-5-Enic Acid	7.2416	385.218	385.214	C22H34O3	Monohydroxy bile acids, alcohols and derivatives	NPBNRBWMDNZEBN-YTEKVJICSA-N	O=C(O)C(C)C1CCC2C3CC=C4CC(O)CCC4(C)C3CCC12C	10.2281	99.7	24.4224
3-Chlorotyrosine	15.2698	216.043	216.042	C9H10ClNO3	Tyrosine and derivatives	ACWBBAGYTKWBCD-ZETCQYMHSA-N	O=C(O)C(N)CC1=CC=C(O)C(Cl)=C1	3.2864	100	64.7257
3-METHOXYTYROSINE	14.9156	212.089	212.092	C10H13NO4	Tyrosine and derivatives	PFDUUKDQEHURQC-UHFFFAOYSA-N	COC1=CC(CC(N)C(O)=O)=CC=C1O	15.2764	99.8	74.2997
3-Methylpyrazole	18.6661	83.0606	83.0604	C4H6N2	Pyrazoles	XKVUYEYANWFIJX-UHFFFAOYSA-N	CC1=NNC=C1	2.88946	100	50.7196
3-octadecanoyloxy-4-(trimethylazaniumyl)butanoate	12.3124	428.371	428.373	C25H49NO4	Acyl carnitines	FNPHNLNTJNMAEE-UHFFFAOYSA-N	CCCCCCCCCCCCCCCCCC(=O)OC(CC(=O)[O-])C[N+](C)(C)C	4.99564	99.9	116.071
4-(3-Phenylpropyl)pyridine	21.4656	198.125	198.128	C14H15N	Pyridines and derivatives	AQIIVEISJBBUCR-UHFFFAOYSA-N	C(CC1=CC=CC=C1)CC1=CC=NC=C1	14.7884	99.8	448.893
4,9-dimethoxy-7-(perfluorobutyl)-5H-furo[3,2-g]chromen-5-one	21.7377	465.039	465.04	C17H9F9O5	Furanochromones	BVUOXVSHTGNMRR-UHFFFAOYSA-N	O=C1C=C(OC=2C(OC)=C3OC=CC3=C(OC)C12)C(F)(F)C(F)(F)C(F)(F)C(F)(F)F	1.95682	100	48.9193
4.4-DDE	14.5983	315.938	315.937	C14H8Cl4	Diphenylmethanes	UCNVFOCBFJOQAL-UHFFFAOYSA-N	ClC(Cl)=C(C1=CC=C(Cl)C=C1)C1=CC=C(Cl)C=C1	0.0949555	100	48.722
4-[(E)-2-[(1R,4aS,5R,6R,8aR)-6-hydroxy-5-(hydroxymethyl)-5,8a-dimethyl-2-methylidene-3,4,4a,6,7,8-hexahydro-1H-naphthalen-1-yl]ethenyl]-2H-furan-5-one	18.7674	350.227	350.233	C20H28O4	Diterpene lactones	XMJAJFVLHDIEHF-CRBRZBHVSA-N	O=C1OCC=C1C=CC2C(=C)CCC3C(C)(CO)C(O)CCC23C	16.4748	99.3	25.479
4-ACETAMIDOBUTANOATE	17.6175	146.078	146.081	C6H11NO3	Gamma amino acids and derivatives	UZTFMUBKZQVKLK-UHFFFAOYSA-N	CC(=O)NCCCC(=O)O	19.0305	99.9	136.595
4-amino-2-hydroxy-5-[[1-hydroxy-1-(5-oxo-6-bicyclo[4.1.0]hept-3-enyl)propan-2-yl]amino]-5-oxopentanoic acid	18.556	344.181	344.182	C15H22N2O6	Glutamic acid and derivatives	SYGQXRLXOOXDRP-UHFFFAOYSA-N	O=C(O)C(O)CC(N)C(O)=NC(C)C(O)C12C(=O)C=CCC2C1	2.06286	100	38.4896
4-Aminohippurate	20.6801	195.076	195.076	C9H10N2O3	Hippuric acids	HSMNQINEKMPTIC-UHFFFAOYSA-N	C1=CC(=CC=C1C(=O)NCC(=O)O)N	4.7161	100	95.5542
4-Aminomethylcyclohexanecarboxylic acid	21.4181	158.115	158.118	C8H15NO2	Amino acids	GYDJEQRTZSCIOI-LJGSYFOKSA-N	O=C(O)C1CCC(CN)CC1	14.2299	99.9	67.4978
4-aminovaleric acid betaine; CE0; RXHVPPWXTMHWGY-UHFFFAOYSA-N	20.9055	160.131	160.133	C8H17NO2	NA	RXHVPPWXTMHWGY-UHFFFAOYSA-N	CC(CCC(=O)[O-])[N+](C)(C)C	13.1765	99.9	47.9029
4-Chloro-6-O-methylnorlichexanthone	10.8293	307.041	307.037	C15H11ClO5	Xanthones	UBUNKICAVVWKMH-UHFFFAOYSA-N	CC1=CC(OC)=CC2=C1C(C3=C(C(Cl)=C(O)C=C3O)O2)=O	14.4282	99.6	238.342
4-hydroxy-4-(pyridin-2-yl)butan-2-one	13.8874	188.07	188.07	C9H11NO2	Pyridines and derivatives	NYKHQRHPWDLZTL-UHFFFAOYSA-N	O=C(C)CC(O)C1=NC=CC=C1	0.478545	100	24.7534
4-Methyl-5-thiazoleethanol	8.11873	144.045	144.048	C6H9NOS	4,5-disubstituted thiazoles	BKAWJIRCKVUVED-UHFFFAOYSA-N	OCCC=1SC=NC1C	19.1603	99.8	794.396
4-Methylpyrimidine	21.4656	95.0596	95.0604	C5H6N2	Pyrimidines and pyrimidine derivatives	LVILGAOSPDLNRM-UHFFFAOYSA-N	CC1=CC=NC=N1	8.5209	100	49.5148
4-PYRIDOXATE	20.1791	148.037	148.039	C8H9NO4	Pyridinecarboxylic acids	HXACOUQIXZGNBF-UHFFFAOYSA-N	CC1=NC=C(CO)C(C(O)=O)=C1O	12.902	99.9	139.167
5,6-Dihydro-5-methyluracil	18.9695	129.066	129.066	C5H8N2O2	Hydropyrimidines	NBAKTGXDIBVZOO-UHFFFAOYSA-N	OC=1N=C(O)C(C)CN1	4.95871	100	66.3662
5-Hydroxy-1,2,3-triazole	7.66447	86.0344	86.0349	C2H3N3O	Triazolones	QEASJVYPHMYPJM-UHFFFAOYSA-N	OC1=CN=NN1	5.4629	100	21.0105
5-HYDROXY-L-TRYPTOPHAN	14.9406	221.091	221.092	C11H12N2O3	Serotonins	LDCYZAJDBXYCGN-UHFFFAOYSA-N	C1=CC2=C(C=C1O)C(=CN2)CC(C(=O)O)N	2.57811	100	21.7126
5-HYDROXYLYSINE	7.74573	145.098	145.097	C6H14N2O3	Alpha amino acids	YSMODUONRAFBET-UHNVWZDZSA-N	NC[C@H](O)CC[C@H](N)C(O)=O	3.10137	100	23.469
5-Methylbenzotriazole	9.70718	134.071	134.071	C7H7N3	Benzotriazoles	LRUDIIUSNGCQKF-UHFFFAOYSA-N	N1=NC=2C=CC(=CC2N1)C	0.52211	100	42.2066
6,7-Dihydrotabersonine	10.209	361.188	361.19	C21H26N2O2	Aspidospermatan-type alkaloids	GIGFIWJRTMBSRP-ACRUOGEOSA-N	O=C(OC)C1=C2NC=3C=CC=CC3C24CCN5CCCC(C1)(CC)C54	5.26039	99.9	22.8431
6-chloro-4,5,7-trihydroxy-9,10-dioxoanthracene-2-carboxylic acid	14.5681	356.975	356.977	C15H7ClO7	Anthracenecarboxylic acids	JGHTWRZCNLXYPF-UHFFFAOYSA-N	O=C(O)C1=CC(O)=C2C(=O)C3=C(O)C(Cl)=C(O)C=C3C(=O)C2=C1	6.61107	99.9	142.756
6-isopropoxynicotinic acid	14.6779	204.061	204.06	C9H11NO3	Pyridinecarboxylic acids	OOIMOWCIYNEWCF-UHFFFAOYSA-N	O=C(O)C1=CN=C(OC(C)C)C=C1	4.41047	100	27.14
6-methyl-2-thiouracil	15.2698	143.025	143.027	C5H6N2OS	Pyrimidones	HWGBHCRJGXAGEU-UHFFFAOYSA-N	Cc1cc(=O)[nH]c(=S)[nH]1	14.4028	99.9	68.1675
7-methyl-1-[(2S,3R,4S,5S,6R)-3,4,5-trihydroxy-6-(hydroxymethyl)oxan-2-yl]oxy-1,5,6,7a-tetrahydrocyclopenta[c]pyran-4a,5,7-triol	21.2624	403.101	403.1	C15H24O10	Iridoid O-glycosides	XUWSHXDEJOOIND-MEVVXUJLSA-N	OCC1OC(OC2OC=CC3(O)C(O)CC(O)(C)C23)C(O)C(O)C1O	1.98462	100	20.9409
7-Methylguanine	10.4053	166.072	166.072	C6H7N5O	Hypoxanthines	FZWGECJQACGGTI-UHFFFAOYSA-N	NC(N1)=Nc(n2)c(n(C)c2)C(=O)1	4.45589	100	39.2247
7-O-Ethylmorroniside	22.2158	457.169	457.169	C19H30O11	O-glycosyl compounds	IRKFOLIBBQDADK-LEYKIWRXSA-N	O=C(OC)C1=COC(OC2OC(CO)C(O)C(O)C2O)C3C(OC(OCC)CC13)C	0.0218737	100	47.9453
8-acetamido-2-methyl-7-oxononanoic acid	10.8029	266.135	266.136	C12H21NO4	Medium-chain fatty acids	UALLEVOGEQZKSX-UHFFFAOYSA-N	O=C(O)C(C)CCCCC(=O)C(N=C(O)C)C	5.97438	100	30.838
8-Acetylharpagide	21.2206	429.134	429.135	C17H26O11	Iridoid O-glycosides	CAFTUQNGDROXEZ-XBDCZORHSA-N	O=C(OC1(C)CC(O)C2(O)C=COC(OC3OC(CO)C(O)C(O)C3O)C21)C	2.5866	100	41.1451
8-methanesulfinyloctan-1-amine; PlaSMA ID-577	17.8565	192.141	192.141	C9H21NOS	Glucosinolate breakdown metabolites	SSWZIHDEYOORCA-UHFFFAOYNA-N	CS(=O)CCCCCCCCN	0	100	52.7501
8phiC8SPC	9.9152	301.111	301.11	C14H20O5S	Benzenesulfonic acids and derivatives	KCKCVKAROJRVBA-UHFFFAOYSA-N	OS(=O)(=O)c1ccc(CCCCCCCC(=O)O)cc1	0.630998	100	26.8817
8-Shogaol	18.7717	327.188	327.19	C19H28O3	Shogaols	LGZSMXJRMTYABD-MDZDMXLPSA-N	O=C(C=CCCCCCCC)CCC1=CC=C(O)C(OC)=C1	6.72392	99.9	65.1827
9-Methoxy-2,2-dimethyl-2,6-dihydro-pyrano[3,2-c]quinolin-5-one	20.8148	280.09	280.094	C15H15NO3	Pyranoquinolines	IXRKDGGGFFCRIR-UHFFFAOYSA-N	OC1=NC=2C=CC(OC)=CC2C=3OC(C=CC13)(C)C	14.3523	99.7	21.4762
Abiraterone (CB-7598)	4.06147	350.246	350.248	C24H31NO	Androgens and derivatives	GZOSMCIZMLWJML-APXSMTNNSA-N	C1[C@@H](CC2[C@](C1)([C@]3([C@@](CC=2)([C@]4([C@](CC3)(C(=CC4)C5=CN=CC=C5)C)[H])[H])[H])C)O	4.36834	100	24.452
ACETOACETATE	20.7258	103.038	103.039	C4H6O3	Short-chain keto acids and derivatives	WDJHALXBUFZDSR-UHFFFAOYSA-N	CC(=O)CC(=O)O	12.3254	100	52.3566
Acetylcarnitine; CE0; RDHQFKQIGNGIED-UHFFFAOYSA-N	20.2065	204.12	204.123	C9H18NO4	Acyl carnitines	RDHQFKQIGNGIED-UHFFFAOYSA-N	CC(=O)OC(CC(=O)[O-])C[N+](C)(C)C	12.3945	99.9	3944.25
Acetylcholine; CE0; OIPILFWXSMYKGL-UHFFFAOYSA-N	21.4181	146.116	146.118	C7H16NO2	Acyl cholines	OIPILFWXSMYKGL-UHFFFAOYSA-N	CC(=O)OCC[N+](C)(C)C	9.23914	100	2057.45
ACTIPHENOL	9.04653	298.104	298.105	C15H17NO4	Alkyl-phenylketones	YTLMIHBTPWTPEV-UHFFFAOYSA-N	O=C1N=C(O)CC(C1)CC(=O)C=2C=C(C=C(C2O)C)C	3.28743	100	20.6332
Adenine; CE0; GFFGJBXGBJISGV-UHFFFAOYSA-N	9.73598	136.062	136.062	C5H5N5	6-aminopurines	GFFGJBXGBJISGV-UHFFFAOYSA-N	c1nc2c(N)nc[nH]c2n1	0.514472	100	36.738
Ala-Leu	20.1474	203.139	203.139	C9H18N2O3	Peptides	RDIKFPRVLJLMER-UHFFFAOYSA-N	O=C(O)C(N=C(O)C(N)C)CC(C)C	0.590728	100	93.0182
Alanine conjugated chenodeoxycholic acid	12.5913	446.322	446.326	C27H45NO5	Glycinated bile acids and derivatives	HHGKPVQSNIVPPF-STVJXAOYSA-N	C[C@H](CCC(N[C@@H](C)C(O)=O)=O)[C@H]1CC[C@@]2([H])[C@]3([H])[C@H](O)C[C@]4([H])C[C@H](O)CC[C@]4(C)[C@H]3CC[C@@]21C	8.91724	99.7	70.9199
Alibendol	11.8491	252.122	252.123	C13H17NO4	Salicylamides	UMJHTFHIQDEGKB-UHFFFAOYSA-N	C1=C(C(=C(C=C1CC=C)C(=O)NCCO)O)OC	4.87857	100	22.2307
AM-251	3.42805	555.027	555.021	C22H21Cl2IN4O	Phenylpyrazoles	BUZAJRPLUGXRAB-UHFFFAOYSA-N	ClC1=CC=C(C(Cl)=C1)N2N=C(C(O)=NN3CCCCC3)C(=C2C=4C=CC(I)=CC4)C	11.1707	99.2	25.3615
Aminoadipic Acid	14.4085	144.066	144.066	C6H11NO4	L-alpha-amino acids	OYIFNHCXNCRBQI-BYPYZUCNSA-N	C(C[C@@H](C(=O)O)N)CC(=O)O	1.94356	100	35.4461
Aminobutyl benzamide; PlaSMA ID-587	16.8779	193.135	193.134	C11H16N2O	Others	VMQHGBUSMBFWHN-UHFFFAOYSA-N	NCCCCNC(=O)C1=CC=CC=C1	5.64376	100	20.4881
Anhydrohaloxindole A	11.1677	375.125	375.123	C21H21ClN2O	Isoindolones	ZHHYANZIARLNFJ-FWKFCYAVSA-N	CC1(C)[C@]2([H])C([C@@H]([N+]#[C-])[C@@](C)(C=C)[C@H](Cl)C2)=C3C4=C1C=CC=C4NC3=O	5.41155	99.9	24.2654
ANISOMYCIN	18.7957	283.163	283.165	C14H19NO4	Anisoles	YKJYKKNCCRKFSL-BFHYXJOUSA-N	O=C(OC1C(O)CNC1CC2=CC=C(OC)C=C2)C	8.54625	99.9	77.7413
Apparicine	20.4853	265.172	265.17	C18H20N2	Vallesaman alkaloids	LCVACABZTLIWCE-SUSILRQXSA-N	C=C([C@]1([H])CCN(C2)C/C1=C/C)C3=C2C4=C(N3)C=CC=C4	8.59826	99.9	63.6858
Aspicilin	4.35208	346.259	346.259	C18H32O5	Macrolides and analogues	KECCBFYFEOTIBV-KHDHUXSVSA-N	C[C@@H]1OC(=O)/C=C/[C@H]([C@H]([C@@H](CCCCCCCCCC1)O)O)O	1.47289	100	24.5027
Bakuchiol	13.6243	279.167	279.17	C18H24O	Aromatic monoterpenoids	LFYJSSARVMHQJB-QIXNEVBVSA-N	OC1=CC=C(C=C1)C=CC(C=C)(C)CCC=C(C)C	11.8566	99.8	78.2606
Benzanthrone	14.3779	231.084	231.08	C17H10O	Phenanthrenes and derivatives	HUKPVYBUJRAUAG-UHFFFAOYSA-N	O=C1c2ccccc2-c2cccc3cccc1c23	13.6749	99.8	22.4882
Benzyldiethylamine	15.0879	164.143	164.143	C11H17N	Phenylmethylamines	ZWRDBWDXRLPESY-UHFFFAOYSA-N	CCN(CC)Cc1ccccc1	1.03568	100	25.2276
bergenin	11.4529	329.082	329.08	C14H16O9	Gallic acid and derivatives	YWJXCIXBAKGUKZ-HJJNZUOJSA-N	O=C1OC2C(O)C(O)C(OC2C3=C(O)C(OC)=C(O)C=C13)CO	6.10794	99.9	53.275
Beta-Caryophyllene Alcohol	12.2195	240.229	240.232	C15H26O	Tertiary alcohols	FUQAYSQLAOJBBC-UHFFFAOYSA-N	OC12CCCC(C)(CCC3C1CC3(C)C)C2	12.4463	99.8	229.228
BETAINE	18.3788	140.066	140.068	C5H11NO2	Alpha amino acids	KWIUHFFTVRNATP-UHFFFAOYSA-N	C[N+](C)(C)CC(=O)[O-]	15.778	99.9	223.808
bis-(acetyl)diaminopentane	7.4997	209.124	209.126	C9H18N2O2	Acetamides	FQKKPLXFGDCBJT-UHFFFAOYSA-N	OC(=NCCCCCN=C(O)C)C	9.32452	99.9	33.9075
Bisoprolol	6.98978	326.227	326.233	C18H31NO4	Benzylethers	VHYCDWMUTMEGQY-UHFFFAOYSA-N	CC(C)NCC(O)COc1ccc(COCCOC(C)C)cc1	16.7672	99.4	21.0982
BROMO-3-HYDROXY-4-(SUCCIN-2-YL)-CARYOLANE gamma-LACTONE	8.11873	437.065	437.072	C19H27BrO4	Gamma butyrolactones	CWCXONZIEDNVKI-UHFFFAOYSA-N	O=C(O)CC1C(=O)OC23CC(CBr)(CCC4C2CC4(C)C)CCC13	17.4342	98.8	30.5899
Bupropion	12.0955	240.116	240.115	C13H18ClNO	Alkyl-phenylketones	SNPPWIUOZRMYNY-UHFFFAOYSA-N	CC(NC(C)(C)C)C(=O)c1cccc(Cl)c1	4.70608	100	78.9812
Butylamine	18.4271	74.0967	74.0964	C4H11N	Monoalkylamines	HQABUPZFAYXKJW-UHFFFAOYSA-N	CCCCN	3.6439	100	20.9465
Calycanthine	17.3482	369.201	369.2	C22H26N4	Aminoquinolines and derivatives	XSYCDVWYEVUDKQ-LIKPIUCQSA-N	C=1C=CC2=C(C1)NC3N(C)CCC24C5NC=6C=CC=CC6C34CCN5C	2.68147	100	38.4541
Camptothecin	3.18623	371.099	371.1	C20H16N2O4	Camptothecins	VSJKWCGYPAHWDS-FQEVSTJZSA-N	O=C1OCC=2C(=O)N3C(=CC2C1(O)CC)C=4N=C5C=CC=CC5=CC4C3	2.1827	100	22.5788
Capsaicin	4.31758	306.208	306.206	C18H27NO3	Methoxyphenols	YKPUWZUDDOIDPM-SOFGYWHQSA-N	OC1=CC=C(C=C1OC)CN=C(O)CCCCC=CC(C)C	4.70271	100	21.2877
Carbazole	22.2495	168.079	168.081	C12H9N	Carbazoles	UJOBWOGCFQCDNV-UHFFFAOYSA-N	c1ccc2c(c1)c1ccccc1[nH]2	11.7801	99.9	24.4281
Carboline base + 4H, carboxylic acid; PlaSMA ID-805	8.66067	217.101	217.101	C12H12N2O2	Carbolines	FSNCEEGOMTYXKY-UHFFFAOYNA-N	O=C(O)C3NCC=2NC1=CC=CC=C1C=2C3	2.34914	100	25.3295
Caryophyllene [T(-)]	7.2126	191.179	191.179	C14H22	Branched unsaturated hydrocarbons	INOSMXBKABLUIL-CHWSQXEVSA-N	C=C1CC=C(C)CCC2C1CC2(C)C	0.366148	100	23.8676
Castanospermine	18.0504	190.105	190.107	C8H15NO4	Indolizidines	JDVVGAQPNNXQDW-TVNFTVLESA-N	O[C@@H](C1)[C@@H](O)[C@H](O)[C@@H]([C@@H](O)2)N(CC2)1	12.0458	99.9	376.927
Choline [M]+	20.7805	104.105	104.107	C5H14NO+	Cholines	OEYIOHPDSNJKLS-UHFFFAOYSA-N	OCC[N+](C)(C)C	15.2727	100	44.7749
Chrysanthemic Acid	3.73807	186.145	186.149	C10H16O2	Monocyclic monoterpenoids	XLOPRKKSAJMMEW-UHFFFAOYSA-N	O=C(O)C1C(C=C(C)C)C1(C)C	17.9964	99.8	46.4177
Chrysin	19.6415	255.082	255.08	C15H10O4	Flavones	RTIXKCRFFJGDFG-UHFFFAOYSA-N	O=C1C=C(OC=2C=C(O)C=C(O)C12)C=3C=CC=CC3	6.27254	100	44.0838
Cinanserin	17.9041	341.165	341.168	C20H24N2OS	Cinnamic acid amides	RSUVYMGADVXGOU-BUHFOSPRSA-N	OC(=NC=1C=CC=CC1SCCCN(C)C)C=CC=2C=CC=CC2	9.99507	99.8	43.6513
Cinnamamide	7.58528	148.075	148.076	C9H9NO	Cinnamic acid amides	APEJMQOBVMLION-VOTSOKGWSA-N	NC(=O)\C=C\C1=CC=CC=C1	1.89092	100	133.126
Citrazinc acid	7.19855	156.03	156.029	C6H5NO4	Pyridinecarboxylic acids	CSGQJHQYWJLPKY-UHFFFAOYSA-N	O=C(O)C=1C=C(O)N=C(O)C1	4.29407	100	49.4557
CITRULLINE	20.4174	198.086	198.085	C6H13N3O3	L-alpha-amino acids	RHGKLRLOHDJJDR-BYPYZUCNSA-N	C(C[C@@H](C(=O)O)N)CNC(=O)N	3.93771	100	64.401
Clonidine	8.11873	230.029	230.025	C9H9Cl2N3	Dichlorobenzenes	GJSURZIOUXUGAL-UHFFFAOYSA-N	ClC1=CC=CC(Cl)=C1NC2=NCCN2	17.259	99.7	1210.74
Clopyralid	8.09368	191.958	191.961	C6H3Cl2NO2	Pyridinecarboxylic acids	HUBANNPOLNYSAD-UHFFFAOYSA-N	OC(=O)c1nc(Cl)ccc1Cl	14.8988	99.8	40.6989
CREATINE	17.9091	132.076	132.077	C4H9N3O2	Alpha amino acids and derivatives	CVSVTCORWBXHQV-UHFFFAOYSA-N	CN(CC(=O)O)C(=N)N	9.46419	100	227.702
Crotonoside	11.4727	306.08	306.08	C10H13N5O5	Purine nucleosides	MIKUYHXYGGJMLM-UUOKFMHZSA-N	O=C1N=C(N)C=2N=CN(C2N1)C3OC(CO)C(O)C3O	0.686095	100	47.4249
culantraramine	18.4264	491.36	491.36	C32H46N2O2	Aromatic monoterpenoids	ZULSSCAFEXMMQF-LYVYPOQBSA-N	O(C1=CC=C(C=C1C2C=C(C)CC(C3=CC(=CC=C3OC)CCN(C)C)C2C(=C)C)CCN(C)C)C	0.590199	100	36.414
cyclopenin	9.92257	317.087	317.09	C17H14N2O3	1,4-benzodiazepines	APLKWZASYUZSBL-PBHICJAKSA-N	O=C1C=2C=CC=CC2N=C(O)C3(OC3C=4C=CC=CC4)N1C	8.07343	99.9	20.5932
CYCLOPENTANONE	20.4174	102.091	102.091	C5H8O	Cyclic ketones	BGTOWKSIORTVQH-UHFFFAOYSA-N	C1CCC(=O)C1	0.391806	100	34.4357
Cyclo-prolylglycine; PlaSMA ID-262	20.854	155.081	155.082	C7H10N2O2	Amino acids	OWOHLURDBZHNGG-UHFFFAOYNA-N	O=C1CNC(=O)C2CCCN12	3.86893	100	4957.21
CYCLOSERINE	14.764	103.052	103.05	C3H6N2O2	Alpha amino acids and derivatives	DYDCUQKUCUHJBH-UWTATZPHSA-N	OC1=NOCC1N	15.5264	99.9	23.9496
Cytosine; CE0; OPTASPLRGRRNAP-UHFFFAOYSA-N	10.5987	112.05	112.051	C4H5N3O	Pyrimidones	OPTASPLRGRRNAP-UHFFFAOYSA-N	c1cnc([nH]c1=N)O	8.38907	100	324.566
D-(+)-GALACTOSAMINE	9.3659	180.086	180.087	C6H13NO5	Hexoses	MSWZFWKMSRAUBD-GASJEMHNSA-N	C([C@@H]1[C@@H]([C@@H]([C@H](C(O1)O)N)O)O)O	3.05409	100	43.2432
D-2-Aminobutyrate	3.9176	207.134	207.134	C4H9NO2	D-alpha-amino acids	QWCKQJZIFLGMSD-GSVOUGTGSA-N	CCC(N)C(O)=O	2.26906	100	28.054
Dehydrophytosphingosine (not validated) - 2H	4.225	314.266	314.269	C18H35NO3	1,3-aminoalcohols	WWXZQFWOWANITM-AQASXUMVSA-N	CCCCCCCCC\C=C\C=C\CC(O)C(O)C(N)CO	8.52773	99.9	68.3966
Dehydrophytosphingosine (not validated, isomer of 1679); PlaSMA ID-1677	4.35803	316.283	316.285	C18H37NO3	Lipids	CQKNELOTFUSOTP-UHFFFAOYNA-N	OCC(N)C(O)C(O)CCCC=CCCCCCCCCC	3.82567	100	24.3793
Dendroamide C	19.5745	537.111	537.104	C21H24N6O5S3	Macrolactams	VBKOUAVWXRGGDI-UHFFFAOYSA-N	CC1C2=NC(=C(O2)C)C(=O)NC(C3=NC(=CS3)C(=O)NC(C4=NC(=CS4)C(=O)N1)CCS(=O)C)C	12.6419	99.1	56.2748
DEOXYGUANOSINE	11.7113	290.085	290.086	C10H13N5O4	Purine 2'-deoxyribonucleosides	YKBGVTZYEHREMT-KVQBGUIXSA-N	NC1=NC2=C(N=CN2[C@H]2C[C@H](O)[C@@H](CO)O2)C(=O)N1	2.65439	100	32.1274
DG(20:5/0:0/20:5) (d5)	8.07455	688.496	688.496	C43H59D5O5	Other hydroxyeicosapolyenoic acids	TXYVJIXIUGRAFF-VSBNSUKNSA-N	[2H]C(OC(=O)CCC/C=C\C/C=C\C/C=C\C/C=C\C/C=C\CC)(C(O)(C(OC(=O)CCC/C=C\C/C=C\C/C=C\C/C=C\C/C=C\CC)([2H])[2H])[2H])[2H]	0.101671	100	35.9482
DIACETYL	19.046	87.0427	87.044	C4H6O2	Alpha-diketones	QSJXEFYPDANLFS-UHFFFAOYSA-N	CC(=O)C(=O)C	15.2796	100	30.3529
Diallyl Trisulfide	18.7897	179.001	179.002	C6H10S3	Organic trisulfides	UBAXRAHSPKWNCX-UHFFFAOYSA-N	S(SCC=C)SCC=C	1.34077	100	713.095
DIBOA	15.2698	182.045	182.045	C8H7NO4	Benzoxazinones	COVOPZQGJGUPEY-UHFFFAOYSA-N	O=C1N(O)C2=CC=CC=C2(OC1(O))	0.439452	100	46.9443
Dibucaine	7.27713	344.239	344.233	C20H29N3O2	Quinolones and derivatives	PUFQVTATUTYEAL-UHFFFAOYSA-N	CCCCOC1=CC(C(=O)NCCN(CC)CC)=C2C=CC=CC2=N1	16.4133	99.4	53.9196
Dicyclohexylamine	13.2515	182.19	182.19	C12H23N	Cyclohexylamines	XBPCUCUWBYBCDP-UHFFFAOYSA-N	C1CCC(CC1)NC1CCCCC1	1.20753	100	25.6866
Dihydoroferuloyl Octylamine; PlaSMA ID-1639	7.62487	310.233	310.236	C18H31NO3	Ferulic acid and derivatives	HNHHAOUUFVYDEW-UHFFFAOYNA-N	CCCCCCCCNC(O)CCC1=CC(OC)=C(O)C=C1	9.99238	99.8	23.954
Dihydrojasmone	4.54123	167.143	167.143	C11H18O	Cyclic ketones	YCIXWYOBMVNGTB-UHFFFAOYSA-N	CCCCCC(=C(C)1)C(=O)CC1	1.55555	100	22.2658
Dihydrozeatin	18.1424	222.131	222.135	C10H15N5O	6-alkylaminopurines	XXFACTAYGKKOQB-UHFFFAOYSA-N	OCC(C)CCNC=1N=CNC2=NC=NC21	17.6919	99.7	32.3625
Dimethyl?sulfoxide	8.18145	79.0203	79.0212	C2H6OS	Sulfoxides	IAZDPXIOMUYVGZ-UHFFFAOYSA-N	O=S(C)C	11.0097	100	23.4828
dioctylamine	12.2359	242.285	242.284	C16H35N	Dialkylamines	LAWOZCWGWDVVSG-UHFFFAOYSA-N	N(CCCCCCCC)CCCCCCCC	3.59082	100	490.192
Dodecylamine	12.5081	186.221	186.222	C12H27N	Monoalkylamines	JRBPAEWTRLWTQC-UHFFFAOYSA-N	CCCCCCCCCCCCN	1.77208	100	26.2391
DUARTIN (-)	18.4367	333.134	333.133	C18H20O6	3'-hydroxy,4'-methoxyisoflavonoids	QVVPJFBYFYYVDM-LLVKDONJSA-N	OC1=CC=C2C(OCC(C3=CC=C(OC)C(O)=C3OC)C2)=C1OC	2.19132	100	35.1722
echinulin	9.2692	462.316	462.311	C29H39N3O2	Alpha amino acids and derivatives	DIKMWTRJIZQJMY-CYFREDJKSA-N	C=CC(C)(C1=C(C2=CC(C/C=C(C)\C)=CC(C/C=C(C)\C)=C2N1)C[C@@](N3)([H])C(N[C@H](C3=O)C)=O)C	10.1879	99.6	23.6428
Ectoine	19.2545	143.079	143.082	C6H10N2O2	Alpha amino acids and derivatives	WQXNXVUDBPYKBA-YFKPBYRVSA-N	CC1=NCCC(N1)C(=O)O	15.3759	99.9	2233.3
Eicosanoids_11-HEPE_C20H30O3	3.76587	336.255	336.253	C20H30O3	Hydroxyeicosapentaenoic acids	IDEHSDHMEMMYIR-WSAGHCNZSA-N	CC\C(=C(/C\C(=C(/C(=C(/C(C\C(=C(/C\C(=C(/CCCC(=O)O)\[H])\[H])\[H])\[H])O)\[H])/[H])\[H])\[H])\[H])\[H]	3.77691	100	98.0177
ERYTHRITOL	20.2065	145.047	145.047	C4H10O4	Sugar alcohols	UNXHWFMMPAWVPI-ZXZARUISSA-N	OC[C@H](O)[C@H](O)CO	1.86146	100	36.6713
ETHYL 3-INDOLEACETATE	11.1044	226.083	226.084	C12H13NO2	Indole-3-acetic acid derivatives	HUDBDWIQSIGUDI-UHFFFAOYSA-N	CCOC(=O)CC1=CNC2=CC=CC=C21	1.99041	100	26.0398
Ethyl-4-dimethylaminobenzoate	20.1873	194.116	194.118	C11H15NO2	Benzoic acid esters	FZUGPQWGEGAKET-UHFFFAOYSA-N	CCOC(=O)C1=CC=C(C=C1)N(C)C	7.98485	100	20.7239
Fensulfothion	13.9144	309.035	309.038	C11H17O4PS2	Phenyl thiophosphates	XDNBJTQLKCIJBV-UHFFFAOYSA-N	CCOP(=S)(OCC)OC1=CC=C(C=C1)S(C)=O	9.28689	99.8	24.3315
Flavone base + 4O, O-HexA-HexA; PlaSMA ID-3100	14.6398	639.124	639.121	C27H26O18	Flavone O-glycosides	PBBVWJQPAZYQDB-UHFFFAOYNA-N	O=C(O)C5OC(OC=1C=C(O)C=2C(=O)C=C(OC=2(C=1))C3=CC=C(O)C(O)=C3)C(OC4OC(C(=O)O)C(O)C(O)C4(O))C(O)C5(O)	4.25584	99.8	23.0491
Flumetsulam	7.74608	326.051	326.052	C12H9F2N5O2S	1,2,4-triazolopyrimidine-2-sulfonanilides	RXCPQSJAVKGONC-UHFFFAOYSA-N	CC(C=3)=Nc(n1)n(C3)nc1S(=O)(=O)Nc(c(F)2)c(F)ccc2	1.19613	100	33.1757
Fluorene	18.8355	167.085	167.086	C13H10	Fluorenes	NIHNNTQXNPWCJQ-UHFFFAOYSA-N	C=1C=CC2=C(C1)C=3C=CC=CC3C2	3.77052	100	23.5929
Flusilazole	15.6905	316.104	316.108	C16H15F2N3Si	Fluorobenzenes	FQKUGOMFVDPBIZ-UHFFFAOYSA-N	C[Si](Cn1cncn1)(c1ccc(F)cc1)c1ccc(F)cc1	10.7558	99.8	21.1056
FR167356	14.4898	378.065	378.066	C19H17Cl2NO3	2-halobenzoic acids and derivatives	GCAOVMKRBUCSET-UHFFFAOYSA-N	CC1=C(C2=C(O1)C(NC(=O)C1=C(Cl)C=CC=C1Cl)=CC=C2)C(C)(C)O	2.72439	100	33.0943
friedelin	11.4992	427.387	427.39	C30H50O	Triterpenoids	OFMXGFHWLZPCFL-SVRPQWSVSA-N	O=C1CCC2C(C)(CCC3C2(C)CCC4(C)C5CC(C)(C)CCC5(C)CCC34C)C1C	7.27673	99.8	23.0397
Fucosterol	7.2416	413.363	413.37	C29H48O	Stigmastanes and derivatives	OSELKOCHBMDKEJ-QPSGOUHRSA-N	OC1CC2=CCC3C(CCC4(C)C(CCC34)C(C)CCC(=CC)C(C)C)C2(C)CC1	17.9016	98.9	21.9892
Gabapentin (Neurontin)	3.76928	172.134	172.133	C9H17NO2	Gamma amino acids and derivatives	UGJMXCAKCUNAIE-UHFFFAOYSA-N	C1CCCC(C1)(CC(O)=O)CN	4.00852	100	26.7658
Gamma-Aminobutyric Acid_major	6.94715	121.099	121.097	C4H9NO2	Gamma amino acids and derivatives	BTCSSZJGUNDROE-UHFFFAOYSA-N	NCCCC(=O)O	12.7996	100	20.5788
Geranic acid	3.76613	169.121	169.122	C10H16O2	Acyclic monoterpenoids	ZHYZQXUYZJNEHD-VQHVLOKHSA-N	O=C(O)C=C(C)CCC=C(C)C	8.86932	100	71.01
geraniol	20.8938	177.129	177.13	C10H18O	Acyclic monoterpenoids	GLZPCOQZEFWAFX-JXMROGBWSA-N	OCC=C(C)CCC=C(C)C	7.9038	100	22.972
GLUCOSAMINATE	11.7158	218.059	218.064	C6H13NO6	D-alpha-amino acids	UFYKDFXCZBTLOO-UHFFFAOYSA-N	C(C(C(C(C(C(=O)O)N)O)O)O)O	18.8477	99.7	21.3976
Glutamyl-S-(C3H5)-Cysteine sulfoxide	11.4584	307.096	307.096	C11H18N2O6S	Dipeptides	LMNDKWXDMBGGAL-UHFFFAOYSA-N	O=C(O)C(N)CCC(=O)NC(C(=O)O)CS(=O)C=CC	0.553573	100	35.0364
Glyceryl linolenate	13.0363	370.297	370.295	C21H36O4	Lineolic acids and derivatives	GGJRAQULURVTAJ-PDBXOOCHSA-N	O=C(OCC(O)CO)CCCCCCCC=CCC=CCC=CCC	3.78077	100	40.0566
Glycine	19.4476	76.0381	76.0393	C2H5NO2	Alpha amino acids	DHMQDGOQFOQNFH-UHFFFAOYSA-N	C(C(=O)O)N	16.3074	100	30.1164
Glycyl-L-proline	18.9083	173.092	173.092	C7H12N2O3	Dipeptides	KZNQNBZMBZJQJO-YFKPBYRVSA-N	NCC(=O)N(C1)C(CC1)C(O)=O	1.9065	100	93.6547
Glyphosat [M+Na+]	11.4529	192.007	192.003	C3H8NO5P	Alpha amino acids and derivatives	XDDAORKBJWWYJS-UHFFFAOYSA-N	C(C(=O)O)NCP(=O)(O)O	17.5518	99.8	352.45
Gramine	17.3717	197.099	197.1	C11H14N2	3-alkylindoles	OCDGBSUVYYVKQZ-UHFFFAOYSA-N	C=1C=CC2=C(C1)NC=C2CN(C)C	3.60223	100	43.819
Grayanotoxin I	7.2416	413.25	413.253	C22H36O7	Leucothol and grayanotoxane diterpenoids	NXCYBYJXCJWMRY-VGBBEZPXSA-N	O=C(OC1C2CCC3C(O)(C)C4CC(O)C(C)(C)C4(O)C(O)CC13CC2(O)C)C	9.17113	99.7	23.0673
guajavarin	8.22548	473.044	473.048	C20H18O11	Flavonoid-3-O-glycosides	PZZRDJXEMZMZFD-IEGSVRCHSA-N	O=C1C(OC2OCC(O)C(O)C2O)=C(OC=3C=C(O)C=C(O)C13)C=4C=CC(O)=C(O)C4	7.96959	99.7	24.52
GUANINE	11.1988	174.035	174.039	C5H5N5O	Purines and purine derivatives	UYTPUPDQBNUYGX-UHFFFAOYSA-N	NC1=NC(=O)C2=C(N1)N=CN2	19.7657	99.8	22.5365
h_48_dehydrochlormethyltestosterone	18.038	317.168	317.167	C20H27ClO2	Androgens and derivatives	AGUNEISBPXQOPA-XMUHMHRVSA-N	O=C1C=C[C@@]2(C)C(CC[C@@H]3[C@@H]2CC[C@@]4(C)[C@H]3CC[C@]4(C)O)=C1Cl	2.64845	100	57.5565
Harmane	13.1719	221.045	221.048	C12H10N2	Harmala alkaloids	PSFDQSOCUJVVGF-UHFFFAOYSA-N	N=1C=CC=2C=3C=CC=CC3NC2C1C	11.536	99.9	34.5928
Hexaethylene glycol; CE0; IIRDTKBZINWQAW-UHFFFAOYSA-N	10.6958	283.175	283.175	C12H26O7	Polyethylene glycols	IIRDTKBZINWQAW-UHFFFAOYSA-N	C(COCCOCCOCCOCCOCCO)O	2.15414	100	48.1504
HISTAMINE DIHYDROCHLORIDE	16.5098	206.021	206.022	C5H11Cl2N3	2-arylethylamines	PPZMYIBUHIPZOS-UHFFFAOYSA-N	Cl.Cl.N1=CNC(=C1)CCN	6.40708	100	123.782
HISTIDINOL	9.18128	124.087	124.087	C6H11N3O	Aralkylamines	ZQISRDCJNBUVMM-YFKPBYRVSA-N	N[C@H](CO)CC1=CN=CN1	3.86826	100	25.0955
HMBOA + O-HexA; PlaSMA ID-2082	21.7073	374.11	374.109	C15H19NO10	Benzoxazinoids	UJMUKMDTAKPTHE-UHFFFAOYNA-N	COC1=CC2=C(NC(O)C(OC3OC(C(O)C(O)C3O)C(O)=O)O2)C=C1	3.23435	100	22.0012
Hydrocotarnine; PlaSMA ID-839	9.8646	222.11	222.112	C12H15NO3	Others	XXANNZJIZQTCBP-UHFFFAOYSA-N	COC1=C2CN(C)CCC2=CC2=C1OCO2	10.22	99.9	62.1256
hydroquinidine	11.4584	327.2	327.2	C20H26N2O2	Cinchona alkaloids	LJOQGZACKSYWCH-NIHZBZNOSA-N	OC(C=1C=CN=C2C=CC(OC)=CC21)C3N4CCC(C3)C(C4)CC	1.19193	100	72.685
Hydroxyurea	11.1194	77.0349	77.0345	CH4N2O2	Carboximidic acids and derivatives	VSNHCAURESNICA-UHFFFAOYSA-N	NC(=O)NO	4.93285	100	22.0944
Hypoxanthine; CE0; FDGQSTZJBFJUBT-UHFFFAOYSA-N	9.59232	137.044	137.046	C5H4N4O	Hypoxanthines	FDGQSTZJBFJUBT-UHFFFAOYSA-N	c1nc2c([nH]1)ncnc2O	12.3316	99.9	58.6407
Imidacloprid urea	7.17933	212.058	212.059	C9H10ClN3O	2-halopyridines	ADWTYURAFSWNSU-UHFFFAOYSA-N	c1cc(ncc1CN2CCN=C2O)Cl	1.98059	100	26.2152
Indazole	18.0492	119.058	119.06	C7H6N2	Indazoles	BAXOFTOLAUCFNW-UHFFFAOYSA-N	c1n[nH]c2ccccc12	17.3861	99.9	31.4466
Indole-3-carboxylic acid; CE0; KMAKOBLIOCQGJP-UHFFFAOYSA-N	7.18942	162.054	162.055	C9H7NO2	Indolecarboxylic acids and derivatives	KMAKOBLIOCQGJP-UHFFFAOYSA-N	c1ccc2c(c1)c(c[nH]2)C(=O)O	8.94758	100	24.5648
Indoline	14.764	120.08	120.081	C8H9N	Indolines	LPAGFVYQRIESJQ-UHFFFAOYSA-N	C1CC2=CC=CC=C2N1	5.57958	100	310.283
INOSINE	10.8293	291.068	291.07	C10H12N4O5	Purine nucleosides	UGQMRVRMYYASKQ-KQYNXXCUSA-N	OC[C@H]1O[C@H]([C@H](O)[C@@H]1O)N1C=NC2=C1N=CNC2=O	6.11537	99.9	69.3859
Isoleucine	20.9244	132.099	132.102	C6H13NO2	Isoleucine and derivatives	AGPKZVBTJJNPAG-WHFBIAKZSA-N	CC[C@H](C)[C@@H](C(=O)O)N	18.9248	99.9	3405.98
ISOPALMITIC ACID	10.9362	274.272	274.274	C16H32O2	Long-chain fatty acids	ZONJATNKKGGVSU-UHFFFAOYSA-N	O=C(O)CCCCCCCCCCCCC(C)C	7.47428	99.9	35.8176
Isopropalin	18.8233	310.178	310.176	C15H23N3O4	Dinitroanilines	NEKOXWSIMFDGMA-UHFFFAOYSA-N	CCCN(CCC)C1=C(C=C(C=C1[N+]([O-])=O)C(C)C)[N+]([O-])=O	6.28675	99.9	34.8223
Isoquercitrin	17.929	483.055	483.05	C21H20O12	Flavonoid-3-O-glycosides	OVSQVDMCBVZWGM-QSOFNFLRSA-N	O=C1C(OC2OC(CO)C(O)C(O)C2O)=C(OC=3C=C(O)C=C(O)C13)C=4C=CC(O)=C(O)C4	10.9927	99.4	32.4094
Juarezic Acid	17.5	197.055	197.057	C11H10O2	Styrenes	FEIQOMCWGDNMHM-KBXRYBNXSA-N	O=C(O)C=CC=CC=1C=CC=CC1	9.64187	99.9	20.3245
Kainic Acid	2.14553	252.067	252.063	C10H15NO4	Kainoids	VLSMHEGGTFMBBZ-OOZYFLPDSA-N	O=C(O)CC1C(NCC1C(=C)C)C(=O)O	13.2506	99.8	21.6257
Ketamine	10.2105	238.102	238.099	C13H16ClNO	Chlorobenzenes	YQEZLKZALYSWHR-UHFFFAOYSA-N	CNC1(CCCCC1=O)C2=CC=CC=C2Cl	9.99583	99.9	24.0744
Kynurenine	21.1539	226.115	226.119	C10H12N2O3	Alkyl-phenylketones	YGPSJZOEDVAXAB-UHFFFAOYSA-N	O=C(O)C(N)CC(=O)C=1C=CC=CC1N	16.8938	99.7	42.9624
Lagochilin	7.28463	357.264	357.264	C20H36O5	Diterpenoids	XYPPDQHBNJURHU-SSLRCSEFSA-N	C[C@@H]1CCC2[C@](C)(CC[C@H](O)[C@@]2(C)CO)[C@]12CCC(CO)(CCO)O2	0.699764	100	29.8962
L-ALANINE	17.9091	90.0534	90.055	C3H7NO2	Alanine and derivatives	QNAYBMKLOCPYGJ-REOHCLBHSA-N	C[C@@H](C(=O)O)N	17.3228	100	33.6539
L-Arginine; CE0; ODKSFYDXXFIFQN-BYPYZUCNSA-N	19.178	175.119	175.119	C6H14N4O2	L-alpha-amino acids	ODKSFYDXXFIFQN-BYPYZUCNSA-N	C(C[C@@H](C(=O)O)N)CNC(=N)N	2.51258	100	64.1758
LAUROYLCARNITINE	13.3794	344.278	344.28	C19H37NO4	Acyl carnitines	FUJLYHJROOYKRA-QGZVFWFLSA-N	CCCCCCCCCCCC(=O)O[C@H](CC(=O)[O-])C[N+](C)(C)C	5.63496	99.9	34.1891
L-Carnitine; CE0; PHIQHXFUZVPYII-ZCFIWIBFSA-N	20.7258	162.111	162.112	C7H15NO3	Carnitines	PHIQHXFUZVPYII-ZCFIWIBFSA-N	C[N+](C)(C)C[C@@H](CC(=O)[O-])O	9.06778	100	10141.8
Lenalidomide	20.0465	260.105	260.103	C13H13N3O3	Isoindolones	GOTYRUGSSMKFNF-UHFFFAOYSA-N	C1=CC(=C2C(=C1)C(N(C2)C3C(NC(CC3)=O)=O)=O)N	8.57353	99.9	33.1418
Leucylglycine; PlaSMA ID-548	18.7674	189.12	189.123	C8H16N2O3	Dipeptides	LESXFEZIFXFIQR-UHFFFAOYNA-N	O=C(O)CNC(=O)C(N)CC(C)C	15.8627	99.8	189.035
LEVODOPA	12.4119	220.06	220.058	C9H11NO4	Tyrosine and derivatives	WTDRDQBEARUVNC-LURJTMIESA-N	O=C(O)C(N)CC1=CC=C(O)C(O)=C1	7.13448	100	33.4492
Lichesterinic acid	13.4508	342.263	342.264	C19H32O4	Butenolides	SLQVVNFTCYVCPB-INIZCTEOSA-N	CCCCCCCCCCCCC[C@H]1C(=C(C(=O)O1)C)C(=O)O	2.60033	100	81.1014
Linoleoyl Ethanolamide	3.74637	324.291	324.29	C20H37NO2	N-acylethanolamines	KQXDGUVSAAQARU-HZJYTTRNSA-N	CCCCC/C=C\C/C=C\CCCCCCCC(=O)NCCO	4.31713	100	82.2739
L-Kynurenine; CE0; YGPSJZOEDVAXAB-QMMMGPOBSA-N	19.4476	209.089	209.092	C10H12N2O3	Alkyl-phenylketones	YGPSJZOEDVAXAB-QMMMGPOBSA-N	c1ccc(c(c1)C(=O)C[C@@H](C(=O)O)N)N	15.1608	99.8	51.6459
Lotusine	7.28463	315.178	315.18	C19H24NO3+	Benzylisoquinolines	ZKTMLINFIQCERN-QGZVFWFLSA-O	OC1=CC=C(C=C1)CC2C3=CC(OC)=C(O)C=C3CC[N+]2(C)C	5.04474	100	32.4093
L-Prolyl-L-isoleucine	19.5745	229.155	229.155	C11H20N2O3	Dipeptides	OCYROESYHWUPBP-CIUDSAMLSA-N	CC[C@H](C)[C@@H](C(=O)O)NC(=O)[C@@H]1CCCN1	0.610941	100	1081.69
Lupanyl Acid_major	13.2681	253.188	253.191	C14H24N2O2	Quinolizidines	PGJCMAPVGINXEQ-UHFFFAOYSA-N	O=C(O)CCC1NCC2CC1CN1CCCCC21	14.0605	99.8	22.0716
Lupinine	3.76587	170.152	170.154	C10H19NO	Lupinine-type alkaloids	HDVAWXXJVMJBAR-VHSXEESVSA-N	OCC1CCCN2CCCCC21	9.1094	100	48.5054
Malic acid	11.4727	135.03	135.03	C4H6O5	Beta hydroxy acids and derivatives	BJEPYKJPYRNKOW-UHFFFAOYSA-N	O=C(O)CC(O)C(=O)O	2.22173	100	21.6723
Melophlin B/C/G/K/L/N/O	7.42018	324.254	324.253	C19H33NO3	N-alkylpyrrolidines	WBPPODSRZVXVJK-MSUUIHNZSA-N	CCCCCCCCCCCC/C(O)=C(C1=O)\C(C(N1C)C)=O	0.832682	100	20.0767
Memantine	7.62487	180.175	180.175	C12H21N	Monoalkylamines	BUGYDGFZZOZRHP-UHFFFAOYSA-N	CC12CC3CC(C)(C1)CC(N)(C3)C2	0.111003	100	36.9815
MENTHOL(-)	3.99375	179.141	179.141	C10H20O	Menthane monoterpenoids	NOOLISFMXDJSKH-UHFFFAOYSA-N	OC1CC(C)CCC1C(C)C	1.45137	100	33.3414
Meprobamate	21.8719	219.133	219.134	C9H18N2O4	Carbamate esters	NPPQSCRMBWNHMW-UHFFFAOYSA-N	N=C(O)OCC(C)(COC(=N)O)CCC	4.70032	100	29.6579
Methacrylamide	11.1799	86.0602	86.06	C4H7NO	Primary carboxylic acid amides	FQPSGWSUVKBHSU-UHFFFAOYSA-N	CC(=C)C(N)=O	1.85917	100	31.7386
Methocarbamol (Robaxin)	15.3834	242.107	242.102	C11H15NO5	Anisoles	GNXFOGHNGIVQEH-UHFFFAOYSA-N	C1=CC=CC(=C1OC)OCC(O)COC(N)=O	18.2154	99.6	476.07
methyl 2-(3,5-dichloro-2-hydroxy-6-methoxy-4-methylbenzoyl)-3,5-dihydroxybenzoate	14.5681	438.977	438.975	C17H14Cl2O7	Benzophenones	IPUONOHBPFSQMA-UHFFFAOYSA-N	O=C(OC)C=1C=C(O)C=C(O)C1C(=O)C2=C(O)C(Cl)=C(C(Cl)=C2OC)C	4.96612	99.9	38.4617
Methyl pyrazine 2-carboxylate	13.4896	139.048	139.05	C6H6N2O2	Pyrazine carboxylic acids	TWIIRMSFZNYMQE-UHFFFAOYSA-N	COC(=O)C1=CN=CC=N1	14.3833	99.9	85.1419
Metolachlor OA	16.8292	280.154	280.154	C15H21NO4	Alpha amino acids and derivatives	LNOOSYCKMKZOJB-UHFFFAOYSA-N	CCC1=CC=CC(C)=C1N(C(C)COC)C(=O)C(O)=O	0.249862	100	20.0332
Mevalonic Acid Lactone	18.0002	148.097	148.097	C6H10O3	Delta valerolactones	JYVXNLLUYHCIIH-UHFFFAOYSA-N	O=C1OCCC(O)(C)C1	1.48551	100	3122.98
MEX_236.1645_17.7	9.7881	236.165	236.165	C14H21NO2	Phenol ethers	KQTNKAWCVIBWHG-UHFFFAOYSA-N	CCC(=O)NC(C)COc1c(C)cccc1C	2.49826	100	21.0665
Mimosine	19.3737	216.094	216.098	C8H10N2O4	Alpha amino acids	WZNJWVWKTVETCG-UHFFFAOYSA-N	O=C(O)C(N)CN1C=CC(=O)C(O)=C1	18.4639	99.7	20.0227
MLS002694509-01!	14.0112	335.255	335.258	C21H34O3	Gluco/mineralocorticoids, progestogins and derivatives	OFWWSHNAQHDEIN-UHFFFAOYSA-N	CC(O)C1CCC2C3CCC4CC(O)CCC4(C)C3C(=O)CC12C	8.53074	99.8	23.8015
MMV090930	14.5714	376.048	376.042	C16H13N3O4S2	Benzothiazoles	ISNBJLXHBBZKSL-UHFFFAOYSA-N	O=C(N=C(O)C=1C=CSC1N=C(O)C2=NC=3C=CC=CC3S2)OCC	15.3706	99.3	130.775
MMV676389	17.3559	369.194	369.192	C20H24N4O3	Benzodioxoles	XDZYNZCKHJDEOX-UHFFFAOYSA-N	O=C(C1=NNC2=C1CCCC2)N3CCN(CC4=CC=C5OCOC5=C4)CC3	6.20273	99.9	64.1955
MMV676401	18.8233	309.175	309.171	C18H20N4O	Quinazolinamines	SRTQBUDNFLRBKO-UHFFFAOYSA-N	N=1C=2C=CC=CC2C(=NCC=3OC=CC3)NC1N4CCCCC4	14.5874	99.6	259.868
MMV688762	18.7899	354.197	354.196	C24H23N3	2-phenylindoles	ARLOHHNBCXKXDE-XMMPIXPASA-N	N=1C=CC=CC1C(C=2C=3C=CC=CC3NC2C=4C=CC=CC4)N5CCCC5	2.62566	100	117.857
MMV688891	14.5681	441.995	441.99	C18H11BrF3NO4	Aromatic anilides	IGCULZQONBAMRE-UHFFFAOYSA-N	O=C1OC=2C(OC)=CC(Br)=CC2C=C1C(O)=NC3=CC=CC(=C3)C(F)(F)F	13.3035	99.3	96.9634
MMV688941	11.3828	350.168	350.175	C22H23NO3	Benzodioxoles	CQSNAAHALWCZHT-UHFFFAOYSA-N	O(C=1C=C(C=C2OCOC12)CN3CCC4(C=CC=5C=CC=CC54)CC3)C	19.3617	99.1	123.128
MMV690103	4.27035	350.207	350.209	C19H23N7	Tetralins	KXSXIFFPCDJUPY-LLVKDONJSA-N	N=C1N=C2NC(=NC=C2C(=N)N1)N(C)C(C3=CC=C4C(=C3)CCCC4)C	4.1975	100	21.4468
Modafinil	10.0687	274.088	274.09	C15H15NO2S	Diphenylmethanes	YFGHCGITMMYXAQ-UHFFFAOYSA-N	O=S(CC(=N)O)C(C=1C=CC=CC1)C=2C=CC=CC2	5.94696	99.9	52.6831
myricitrin	14.5714	503.057	503.059	C21H20O12	Flavonoid-3-O-glycosides	DCYOADKBABEMIQ-OWMUPTOHSA-N	O=C1C(OC2OC(C)C(O)C(O)C2O)=C(OC=3C=C(O)C=C(O)C13)C=4C=C(O)C(O)=C(O)C4	4.21422	99.9	94.3906
Myristoyl Ethanolamide	10.5699	272.256	272.258	C16H33NO2	N-acylethanolamines	JHIXEZNTXMFXEK-UHFFFAOYSA-N	O=C(CCCCCCCCCCCCC)NCCO	7.67653	99.9	41.9519
N,N-dimethyl-7H-purin-6-amine	18.1774	164.09	164.09	C7H9N5	6-alkylaminopurines	BVIAOQMSVZHOJM-UHFFFAOYSA-N	N1=CN=C(C=2NC=NC12)N(C)C	1.21884	100	35.5986
N,N-Dimethyldecylamine oxide	12.8038	202.214	202.217	C12H27NO	Long-chain alkyl amine oxides	ZRKZFNZPJKEWPC-UHFFFAOYSA-N	CCCCCCCCCC[N+](C)(C)[O-]	12.0663	99.9	20.8993
N,N-Dimethyldodecylamine N-oxide	12.3861	230.245	230.248	C14H31NO	Long-chain alkyl amine oxides	SYELZBGXAIXKHU-UHFFFAOYSA-N	CCCCCCCCCCCC[N+](C)(C)[O-]	13.6809	99.8	56.1257
N,N-Dimethylformamide	19.0825	74.0608	74.06	C3H7NO	Tertiary carboxylic acid amides	ZMXDDKWLCZADIW-UHFFFAOYSA-N	O=CN(C)C	10.532	100	23.4977
N-[3-[5,17-bis[3-[acetyl(hydroxy)amino]propyl]-14-benzyl-8-(hydroxymethyl)-11-(2-methylpropyl)-3,6,9,12,15,18-hexaoxo-1,4,7,10,13,16-hexazacyclooctadec-2-yl]propyl]-N-hydroxyacetamide	3.1587	902.388	902.402	C39H61N9O13	Cyclic peptides	ZWTDABBYXDAIOL-UHFFFAOYSA-N	O=C(N(O)CCCC1N=C(O)C(N=C(O)C(N=C(O)C(N=C(O)C(N=C(O)C(N=C1O)CCCN(O)C(=O)C)CCCN(O)C(=O)C)CO)CC(C)C)CC=2C=CC=CC2)C	15.7801	98.8	57.405
N1-ACETYLSPERMINE	14.1198	267.218	267.216	C12H28N4O	Acetamides	GUNURVWAJRRUAV-UHFFFAOYSA-N	CC(=O)NCCCNCCCCNCCCN	10.2913	99.8	21.6696
N2-(4-Nitrophenyl)-L-glutamine	9.28982	268.094	268.093	C11H13N3O5	Glutamine and derivatives	IMTMBDXEKMXETQ-VIFPVBQESA-N	NC(=O)CC[C@H](NC1=CC=C(C=C1)[N+]([O-])=O)C(O)=O	2.98404	100	26.4031
N6-Acetyl-L-lysine; CE0; DTERQYGMUDWYAZ-ZETCQYMHSA-N	20.4949	189.124	189.123	C8H16N2O3	D-alpha-amino acids	DTERQYGMUDWYAZ-ZETCQYMHSA-N	CC(=NCCCC[C@@H](C(=O)O)N)O	5.44618	100	48.911
N-Acetylalanine	16.3221	114.055	114.055	C5H9NO3	N-acyl-alpha amino acids	KTHDTJVBEPMMGL-UHFFFAOYSA-N	CC(C(=O)O)NC(=O)C	3.0687	100	289.407
N-ACETYL-D-MANNOSAMINE	12.308	244.078	244.079	C8H15NO6	N-acyl-alpha-hexosamines	OVRNDRQMDRJTHS-ZTVVOAFPSA-N	CC(=O)N[C@H]1[C@H]([C@@H]([C@H](OC1O)CO)O)O	3.52345	100	253.564
N-Acetyl-epsilon-caprolactam	7.37655	156.099	156.102	C8H13NO2	Caprolactams	QISSLHPKTCLLDL-UHFFFAOYSA-N	O=C(N1C(=O)CCCCC1)C	17.2964	99.9	21.9033
N-Acetylglutamine	14.2106	211.068	211.069	C7H12N2O4	Glutamine and derivatives	KSMRODHGGIIXDV-YFKPBYRVSA-N	CC(=O)N[C@@H](CCC(=O)N)C(=O)O	5.7801	100	31.9715
N-ACETYLLEUCINE	12.7612	196.091	196.094	C8H15NO3	Leucine and derivatives	WXNXCEHXYPACJF-ZETCQYMHSA-N	CC(C)C[C@H](NC(C)=O)C(O)=O	17.4406	99.8	110.311
N-Acetylornithine	20.8347	175.105	175.108	C7H14N2O3	N-acyl-L-alpha-amino acids	JRLGPAXAGHMNOL-LURJTMIESA-N	C/C(=N/[C@@H](CCCN)C(=O)O)/O	17.1894	99.8	44.165
NAD	18.2011	664.113	664.116	C21H27N7O14P2	(5'->5')-dinucleotides	BAWFJGJZGIEFAR-NNYOXOHSSA-N	NC(=O)C1=C[N+](=CC=C1)[C@@H]1O[C@H](COP([O-])(=O)OP(O)(=O)OC[C@H]2O[C@H]([C@H](O)[C@@H]2O)N2C=NC3=C2N=CN=C3N)[C@@H](O)[C@H]1O	5.10453	99.8	22.7383
Nakijiquinone P/Q	7.2416	448.284	448.285	C29H37NO3	Prenylquinones	XPBBMGKNBSHXLB-SECCUNFJSA-N	O=C1C=C(NCCC=2C=CC=CC2)C(=O)C(=C1O)CC3(C)C4C(=CCC3C)C(C)(C)CCC4	0.914598	100	35.6253
N-alpha-(tert-Butoxycarbonyl)-L-histidine	18.5533	256.126	256.129	C11H17N3O4	Histidine and derivatives	AYMLQYFMYHISQO-UHFFFAOYSA-N	CC(C)(C)OC(=O)NC(CC1=CN=CN1)C(=O)O	13.1965	99.8	24.7424
N-ALPHA-ACETYLLYSINE	18.7717	211.103	211.105	C8H16N2O3	N-acyl-alpha amino acids	VEYYWZRYIYDQJM-UHFFFAOYSA-N	CC(=O)NC(CCCCN)C(O)=O	10.5161	99.9	36.3632
N-butyl-N-(1-(cyclohexylamino)-1-oxobutan-2-yl)-4-methylpentanamide	3.82768	339.3	339.301	C20H38N2O2	N-acyl amines	SKTZFCRNZMJIPZ-UHFFFAOYSA-N	CCCCN(C(=O)CCC(C)C)C(CC)C(=O)NC1CCCCC1	1.47362	100	192.693
NCGC00095569-05!4,9-dimethoxyfuro[3,2-g]chromen-7-one	14.6894	264.087	264.087	C13H10O5	8-methoxypsoralens	DFMAXQKDIGCMTL-UHFFFAOYSA-N	COC1=C2OC(=O)C=CC2=C(OC)C3=C1OC=C3	1.74185	100	128.176
NCGC00160256-01!Sparteine-15-carboxylic acid	12.6608	279.207	279.207	C16H26N2O2	Sparteine, lupanine, and related alkaloids	FNCNQQDYISRCJG-GVLTWOEFSA-N	OC(=O)C1CCC[C@@H]2[C@@H]3C[C@@H](C[N@@]12)[C@@H]4CCCCN4C3	2.5071	100	34.452
NCGC00161931-02!4-hydroxy-9-(4-hydroxy-3,5-dimethoxyphenyl)-5a,6,8a,9-tetrahydro-5H-[2]benzofuro[5,6-f][1,3]benzodioxol-8-one [IIN-based: Match]	22.2495	401.122	401.123	C21H20O8	Lignan lactones	JGGWNGRBXJWAOC-UHFFFAOYSA-N	COC1=CC(=CC(OC)=C1O)C2C3C(COC3=O)CC4=C2C=C5OCOC5=C4O	1.77003	100	140.939
NCGC00168836-03_C20H30O4_6,18,19-Trihydroxytrachyloban-2-one	4.3655	352.245	352.248	C20H30O4	Kaurane diterpenoids	WTOYNGQRGOLPNU-UHFFFAOYSA-N	CC12CC34CC(O)C5C(C)(CC(=O)CC5(CO)CO)C3CC1C2C4	8.60189	99.8	20.5538
NCGC00168840-03!5-(1,2,4a,5-tetramethyl-7-oxo-3,4,8,8a-tetrahydro-2H-naphthalen-1-yl)-3-methylpentanoic acid [IIN-based: Match]	4.3777	338.264	338.269	C20H32O3	Colensane and clerodane diterpenoids	RNWHJFUXZQBBLK-UHFFFAOYSA-N	CC(CCC1(C)C(C)CCC2(C)C1CC(=O)C=C2C)CC(O)=O	13.8351	99.6	34.7961
NCGC00169016-02_C15H22O3_Naphtho[1,2-b]furan-2(3H)-one, 3a,4,5,5a,6,7,9a,9b-octahydro-6-hydroxy-3,5a,9-trimethyl-	18.562	292.195	292.191	C15H22O3	Eudesmanolides, secoeudesmanolides, and derivatives	DGIMMEWTLSCNGO-UHFFFAOYSA-N	CC1C2CCC3(C)C(O)C\C=C(\C)C3C2OC1=O	15.9827	99.6	24.5314
NCGC00169318-02!(E)-7-(4-methoxy-5-methyl-6-oxopyran-2-yl)-5-methyloct-6-enoic acid [IIN-based on: CCMSLIB00000846906]	18.8206	277.145	277.143	C16H22O5	Medium-chain fatty acids	HXLDSEPZKLJMIQ-DHZHZOJOSA-N	COC1=C(C)C(=O)OC(=C1)C(\\C)=C\\C(C)CCCC(O)=O	4.58246	100	23.6546
NCGC00169348-03!(3Z)-3-[[5-(2-methylbut-3-en-2-yl)-1H-imidazol-4-yl]methylidene]-6-propan-2-ylpiperazine-2,5-dione [IIN-based: Match]	19.0522	303.182	303.182	C16H22N4O2	Alpha amino acids and derivatives	RSGRSUVVCYUKLM-XFFZJAGNSA-N	CC(C)C1NC(=O)\\C(NC1=O)=C\\C2=C(NC=N2)C(C)(C)C=C	1.15442	100	33.7288
NCGC00169514-02!(5R)-5-hydroxy-1-(4-hydroxy-3-methoxyphenyl)tetradecan-3-one [IIN-based: Match]	13.1727	368.28	368.28	C21H34O4	Gingerols	AIULWNKTYPZYAN-GOSISDBHSA-N	CCCCCCCCC[C@@H](O)CC(=O)CCC1=CC(OC)=C(O)C=C1	2.33518	100	26.4853
NCGC00169680-02!(2S,3S,4S,5R,6S)-3,4,5-trihydroxy-6-(5-hydroxy-6-methoxy-4-oxo-2-phenylchromen-7-yl)oxyoxane-2-carboxylic acid	21.2432	461.107	461.108	C22H20O11	Flavonoid-7-O-glucuronides	QXIPXNZUEQYPLZ-QSUZLTIMSA-N	COC1=C(O[C@@H]2O[C@@H]([C@@H](O)[C@H](O)[C@H]2O)C(O)=O)C=C3OC(=CC(=O)C3=C1O)C4=CC=CC=C4	2.06026	100	23.9197
NCGC00169946-02!2-(1,2-dihydroxypentyl)-4-methoxy-2,3-dihydropyran-6-one [IIN-based: Match]	20.0699	248.149	248.149	C11H18O5	Dihydropyranones	YLHOHANRUSKHKO-UHFFFAOYSA-N	CCCC(O)C(O)C1CC(OC)=CC(=O)O1	0.604475	100	32.6741
NCGC00179796-02!5-[(E)-3-hydroxy-3-methylbut-1-enyl]-2-methylcyclohex-5-ene-1,2,4-triol [IIN-based: Match]	17.929	246.167	246.17	C12H20O4	Cyclitols and derivatives	KLZSJMCXTDLPSF-SNAWJCMRSA-N	CC(C)(O)\\C=C\\C1=CC(O)C(C)(O)CC1O	12.5117	99.8	35.8183
NCGC00180698-03!(2S)-2-[(1S)-1-carboxyundecyl]-5-oxooxolane-2-carboxylic acid	7.2416	329.195	329.196	C17H28O6	Tricarboxylic acids and derivatives	TUXHHVJPGQUPCF-DYVFJYSZSA-N	CCCCCCCCCC[C@H](C(O)=O)[C@@]1(CCC(=O)O1)C(O)=O	1.39734	100	28.9885
NCGC00180733-02!(E)-9-(1,3-benzodioxol-5-yl)-1-piperidin-1-ylnon-8-en-1-one [IIN-based: Match]	11.4461	344.226	344.222	C21H29NO3	Benzodioxoles	FAXXHNWVMKTOFF-UXBLZVDNSA-N	O=C(CCCCCC\\C=C\\C1=CC2=C(OCO2)C=C1)N3CCCCC3	11.5623	99.7	29.1933
NCGC00180747-02!5-[(1S,2R,4aR)-1,2,4a,5-tetramethyl-7-oxo-3,4,8,8a-tetrahydro-2H-naphthalen-1-yl]-3-methylpentanoic acid [IIN-based on: CCMSLIB00000848900]	7.71528	658.511	658.504	C20H32O3	Colensane and clerodane diterpenoids	RNWHJFUXZQBBLK-VWJHISDNSA-N	CC(CC[C@@]1(C)[C@H](C)CC[C@]2(C)C1CC(=O)C=C2C)CC(O)=O	11.2528	98.9	24.8644
NCGC00246242-02!4-(3-hydroxybutyl)phenol	3.99375	149.096	149.096	C10H14O2	1-hydroxy-2-unsubstituted benzenoids	SFUCGABQOMYVJW-UHFFFAOYSA-N	CC(O)CCC1=CC=C(O)C=C1	0.536567	100	25.448
NCGC00247500-02!(2E,4E,12E)-13-(1,3-benzodioxol-5-yl)-N-(2-methylpropyl)trideca-2,4,12-trienamide	7.25332	406.239	406.235	C24H33NO3	Benzodioxoles	FPMPOFBEYSSYDQ-AUVZEZIHSA-N	CC(C)CNC(=O)\C=C\C=C\CCCCCC\C=C\C1=CC2=C(OCO2)C=C1	8.468	99.8	44.9508
NCGC00347406-02!5-(4-carboxy-3-methylbutyl)-5,6,8a-trimethyl-3-oxo-4a,6,7,8-tetrahydro-4H-naphthalene-1-carboxylic acid [IIN-based: Match]	3.86143	368.24	368.243	C20H30O5	Colensane and clerodane diterpenoids	XKXZAYIPFRBKHT-UHFFFAOYSA-N	CC(CCC1(C)C(C)CCC2(C)C1CC(=O)C=C2C(O)=O)CC(O)=O	7.49505	99.9	25.5997
NCGC00347503-02!8-[2-(3,4-dihydroxy-2,5-dimethoxyoxolan-3-yl)ethyl]-4a,7,8-trimethylspiro[2,3,5,6,7,8a-hexahydro-1H-naphthalene-4,2'-oxirane]-2,3-diol	7.20948	448.292	448.291	C22H38O8	O-glycosyl compounds	RLYPFWBODVDUHT-UHFFFAOYSA-N	COC1OC(OC)C(O)(CCC2(C)C(C)CCC3(C)C2CC(O)C(O)C34CO4)C1O	2.45377	100	53.4791
NCGC00347545-02!5-hydroxy-7-(4-hydroxy-2-methoxyphenyl)-2,2-dimethyl-10-(3-methylbut-2-enyl)pyrano[3,2-g]chromen-6-one	21.7642	457.162	457.162	C26H26O6	6-prenylated isoflavanones	PTYKSEHNIOQJNZ-UHFFFAOYSA-N	COC1=CC(O)=CC=C1C2=COC3=C(CC=C(C)C)C4=C(C=CC(C)(C)O4)C(O)=C3C2=O	1.24682	100	35.478
NCGC00347551-02_C23H31NO5_(2R,2'R,4a'S,6'S,7'R,8a'S)-4,6',7'-Trihydroxy-2',5',5',8a'-tetramethyl-3',4',4a',5',6',7,7',8,8',8a'-decahydro-2'H-spiro[furo[2,3-e]isoindole-2,1'-naphthalen]-6(3H)-one	3.86143	384.216	384.217	C23H31NO5	Isoindolones	RUBLIKRGQGISNL-DXORJMCXSA-N	C[C@@H]1CC[C@H]2C(C)(C)[C@H](O)[C@H](O)C[C@]2(C)[C@@]13CC4=C(O3)C5=C(C=C4O)C(=O)NC5	1.95202	100	33.1474
NCGC00347635-02![5-acetyloxy-3-(hydroxymethyl)-2-oxo-6-propan-2-ylcyclohex-3-en-1-yl] 3-methylpentanoate	7.28463	358.223	358.222	C18H28O6	Menthane monoterpenoids	MPXXSICHRNCHHK-UHFFFAOYSA-N	CCC(C)CC(=O)OC1C(C(C)C)C(OC(C)=O)C=C(CO)C1=O	1.92618	100	22.8439
NCGC00347666-02!2,4-dihydroxy-6-methyl-3-[(2E,4E)-3-methyl-5-[(1R,2R,6R)-1,2,6-trimethyl-3-oxocyclohexyl]penta-2,4-dienyl]benzaldehyde [IIN-based: Match]	12.0637	371.226	371.222	C23H30O4	Hydroxybenzaldehydes	AQCKKGIVKOHRLM-HBFAXEOFSA-N	C[C@@H]1CCC(=O)[C@H](C)[C@@]1(C)\\C=C\\C(C)=C\\CC2=C(O)C=C(C)C(C=O)=C2O	12.7148	99.6	20.0375
NCGC00347878-02_C24H28O13_beta-D-Glucopyranoside, 4-hydroxyphenyl 2-O-[(2S,3R,4S)-tetrahydro-3,4-dihydroxy-4-[[(4-hydroxybenzoyl)oxy]methyl]-2-furanyl]-	2.4237	547.133	547.142	C24H28O13	Phenolic glycosides	GDCHGVOUTCXBSI-JALRXJJFSA-N	OC[C@H]1O[C@@H](OC2=CC=C(O)C=C2)[C@H](O[C@@H]3OC[C@](O)(COC(=O)C4=CC=C(O)C=C4)[C@H]3O)[C@@H](O)[C@@H]1O	17.0157	98.6	26.8801
NCGC00380102-01!3-hexadecyl-4-methoxy-5-methyloxolan-2-one [IIN-based: Match]	12.5675	372.345	372.347	C22H42O3	Gamma butyrolactones	DJNFXUFERDZHCD-UHFFFAOYSA-N	CCCCCCCCCCCCCCCCC1C(OC)C(C)OC1=O	5.98903	99.9	33.0879
NCGC00380172-01_C16H24O5_2-Naphthaleneacetic acid, 1,2,3,4,4a,5,8,8a-octahydro-1,8-dihydroxy-alpha,4a,8-trimethyl-5-oxo-, methyl ester	18.7684	297.175	297.17	C16H24O5	Sesquiterpenoids	QTWFZVHPPOTAGN-UHFFFAOYSA-N	COC(=O)C(C)C1CCC2(C)C(C1O)C(C)(O)\C=C/C2=O	18.0032	99.4	22.1214
NCGC00380213-01_C19H32O8_2-Butanone, 4-[3-(beta-D-glucopyranosyloxy)-4-hydroxy-2,6,6-trimethyl-1-cyclohexen-1-yl]-	7.23247	371.206	371.206	C19H32O8	Terpene glycosides	JVIDANAJZDBKRL-FJUMDGKUSA-N	CC(=O)CCC/1=C(C)/C(O[C@@H]2O[C@H](CO)[C@@H](O)[C@H](O)[C@H]2O)C(O)CC1(C)C	0.32327	100	32.4117
NCGC00380372-01!N-[1-(4-methoxy-6-oxopyran-2-yl)-2-methylbutyl]acetamide	18.6928	271.163	271.165	C13H19NO4	Pyranones and derivatives	LFXMHSJWYXKODM-UHFFFAOYSA-N	CCC(C)C(NC(C)=O)C1=CC(OC)=CC(=O)O1	9.66201	99.9	73.0083
NCGC00380424-01_C10H9NO4_1,5-(Epoxymethano)cyclopenta[c]pyran-3-carboxamide, 1,4a,5,7a-tetrahydro-8-oxo-	14.4085	230.044	230.042	C10H9NO4	Delta valerolactones	NBVNAFAEYGKTPJ-UHFFFAOYSA-N	NC(=O)C/1=C/C2C3\C=C/C2C(=O)OC3O1	8.82446	99.9	69.8499
NCGC00380425-01!1-(3,5-dihydroxyphenyl)-12-hydroxytridecan-2-one	13.5627	340.248	340.248	C19H30O4	Long-chain fatty alcohols	LPIOEJKQFMDVFS-UHFFFAOYSA-N	CC(O)CCCCCCCCCC(=O)CC1=CC(O)=CC(O)=C1	1.26378	100	23.5702
NCGC00380593-01_C18H26O6_2,4-Hexadienoic acid, (6E)-3,4,5,8,9,10-hexahydro-8,9-dihydroxy-2-oxo-10-propyl-2H-oxecin-3-yl ester, (2E,4E)-	12.6077	339.178	339.18	C18H26O6	Oxocins	TXPRZPDVUZCNLB-YECGNMMBSA-N	CCCC1OC(=O)C(CC\C=C\C(O)C1O)OC(=O)/C=C/C=C/C	5.04157	99.9	28.3056
NCGC00380601-01!N-[1-(4-methoxy-6-oxopyran-2-yl)-2-methylpropyl]acetamide [IIN-based: Match]	10.8935	240.121	240.123	C12H17NO4	Pyranones and derivatives	WCMUUYZSUQJWRX-UHFFFAOYSA-N	COC1=CC(=O)OC(=C1)C(NC(C)=O)C(C)C	6.37173	100	21.0956
NCGC00380824-01!1-[(Z)-but-2-en-2-yl]-2,8,10-trichloro-3,9-dihydroxy-4,7-dimethylbenzo[b][1,4]benzodioxepin-6-one	21.6841	429.004	429.006	C19H15Cl3O5	Depsides and depsidones	XEQDVQKKHOQZEP-WAYWQWQTSA-N	C\C=C(\C)C1=C(Cl)C(O)=C(C)C2=C1OC3=C(Cl)C(O)=C(Cl)C(C)=C3C(=O)O2	3.42653	100	25.3219
NCGC00380828-01_C20H28O3_	4.24852	334.232	334.238	C20H28O3	Diterpene lactones	AHKUFTRUMQKIPH-VQFHSHCMSA-N	C[C@]12CCC[C@]3(C)[C@H]1[C@@H](OC3=O)[C@H](O)[C@@]45C[C@@H](CC[C@@H]24)C(=C)C5	17.2632	99.3	23.5502
NCGC00380830-01!methyl 2-[(2-hydroxy-3-methylbutanoyl)amino]-3-methylbutanoate [IIN-based on: CCMSLIB00000845070]	10.8576	254.134	254.136	C11H21NO4	N-acyl-alpha amino acids and derivatives	DYTVYDVNJBXBMW-UHFFFAOYSA-N	COC(=O)C(NC(=O)C(O)C(C)C)C(C)C	10.152	99.9	28.4545
NCGC00380913-01_C20H28O5_2(3H)-Furanone, 5-[4-[1-(acetyloxy)-4-oxo-5-[(2Z)-2-penten-1-yl]-2-cyclopenten-1-yl]butyl]dihydro-	7.15053	366.223	366.228	C20H28O5	Prostaglandins and related compounds	ARNKLTDIWFIVMO-PLNGDYQASA-N	CC\C=C/CC1C(=O)\C=C/C1(CCCCC2CCC(=O)O2)OC(C)=O	11.4956	99.6	45.866
NCGC00380976-01_C28H42N2O7_(4E,10E)-13,20-Dihydroxy-8,14-dimethoxy-4,10,12,16-tetramethyl-3-oxo-2-azabicyclo[16.3.1]docosa-1(22),4,10,18,20-pentaen-9-yl carbamate	14.4352	536.33	536.333	C28H42N2O7	Macrolactams	HUXWGTSMSXMDBH-CWNVEXOKSA-N	COC1CC\C=C(/C)C(=O)NC2=CC(=CC(=C2)O)CC(C)CC(OC)C(O)C(C)\C=C(C)\C1OC(N)=O	4.86638	99.9	22.2443
NCGC00381028-01!7-(1,2-dihydroxyethyl)-4,8-dihydroxy-6-methoxy-3,4-dihydro-2H-naphthalen-1-one [IIN-based: Match]	22.4057	269.101	269.102	C13H16O6	Tetralins	YWEIWRDWTNXMJK-UHFFFAOYSA-N	COC1=C(C(O)CO)C(O)=C2C(=O)CCC(O)C2=C1	2.4526	100	20.9404
NCGC00381146-01!2-[5-[2-[2-[5-(2-oxopropyl)oxolan-2-yl]propanoyloxy]butyl]oxolan-2-yl]propanoic acid [IIN-based on: CCMSLIB00000845801]	7.2416	399.239	399.238	C21H34O7	Dicarboxylic acids and derivatives	XFNIQDLOQLIJTQ-UHFFFAOYSA-N	CCC(CC1CCC(O1)C(C)C(O)=O)OC(=O)C(C)C2CCC(CC(C)=O)O2	3.43154	100	21.9107
NCGC00381167-01!(E)-3-(4-hydroxy-3-methoxyphenyl)prop-2-enamide	11.7123	216.063	216.063	C10H11NO3	Hydroxycinnamic acids and derivatives	YYAJJKZSQWOLIP-HWKANZROSA-N	COC1=C(O)C=CC(\C=C\C(N)=O)=C1	0.879373	100	66.9553
NCGC00381205-01_C27H38O6_(5xi,8alpha,9xi,10alpha)-14-Acetoxy-15-{[(2Z)-2-methyl-2-butenoyl]oxy}kaur-16-en-18-oic acid	13.1461	476.307	476.301	C27H38O6	Kaurane diterpenoids	ALSZHZPQTCVXIR-DFCLNXQMSA-N	C\C=C(C)/C(=O)OC1C(=C)[C@H]2CCC3[C@]4(C)CCC[C@](C)(C4CC[C@]13C2OC(C)=O)C(O)=O	12.2612	99.3	20.1104
NCGC00381255-01!8-hydroxy-3-methoxycarbonyl-2-methylidenenonanoic acid [IIN-based on: CCMSLIB00000848611]	19.8307	262.166	262.165	C12H20O5	Medium-chain hydroxy acids and derivatives	QSAIBULZNVPLAJ-UHFFFAOYSA-N	COC(=O)C(CCCCC(C)O)C(=C)C(O)=O	2.32678	100	42.6588
NCGC00381357-01!methyl 3,4,5-trihydroxycyclohexene-1-carboxylate	15.4093	230.102	230.102	C8H12O5	Shikimic acids and derivatves	LSNUUAUXWJZSFD-UHFFFAOYSA-N	COC(=O)C1=CC(O)C(O)C(O)C1	0.478048	100	22.6629
NCGC00381425-01!8-hydroxy-8-(3-octyloxiran-2-yl)octanoic acid [IIN-based: Match]	13.1989	356.279	356.28	C18H34O4	Lineolic acids and derivatives	GQEOLYBERRZZCE-UHFFFAOYSA-N	CCCCCCCCC1OC1C(O)CCCCCCC(O)=O	0.112271	100	24.8697
NCGC00384561-01![1,3-dihydroxy-1-(7-methoxy-2-oxochromen-6-yl)-3-methylbutan-2-yl] 3-methylbutanoate [IIN-based on: CCMSLIB00000848725]	21.7542	401.157	401.157	C20H26O7	Coumarins and derivatives	GMMHQFAVUZIMEL-UHFFFAOYSA-N	COC1=C(C=C2C=CC(=O)OC2=C1)C(O)C(OC(=O)CC(C)C)C(C)(C)O	0.324063	100	22.9166
NCGC00384633-01_C21H24O10_(2S,3R)-3,5-Dihydroxy-2-(4-hydroxyphenyl)-3,4-dihydro-2H-chromen-7-yl beta-D-threo-hexopyranoside	11.4833	459.125	459.126	C21H24O10	Flavonoid-7-O-glycosides	BUZPALUBBJZNNV-ZZIZYRMTSA-N	OC[C@H]1O[C@@H](OC2=CC(=C3C[C@@H](O)[C@@H](OC3=C2)C4=CC=C(O)C=C4)O)[C@H](O)[C@@H](O)[C@@H]1O	3.17995	100	42.6383
NCGC00384896-01!3-[6,12,22-tris(2-amino-2-oxoethyl)-19-(hydroxymethyl)-9-[(4-hydroxyphenyl)methyl]-16-(11-methyltridecyl)-2,5,8,11,14,18,21,24-octaoxo-1,4,7,10,13,17,20,23-octazabicyclo[23.3.0]octacosan-3-yl]propanamide	14.5714	1085.61	1085.6	C51H80N12O14	Cyclic peptides	SYWSRNVDWIDEAD-UHFFFAOYSA-N	CCC(C)CCCCCCCCCCC1CC(=O)NC(CC(N)=O)C(=O)NC(CC2=CC=C(O)C=C2)C(=O)NC(CC(N)=O)C(=O)NC(CCC(N)=O)C(=O)N3CCCC3C(=O)NC(CC(N)=O)C(=O)NC(CO)C(=O)N1	8.29035	98.5	21.3822
NCGC00385110-01_C20H38O2_(2R)-1-(5-Hydroxy-3-methylpentyl)-2,5,5,8a-tetramethyldecahydro-2-naphthalenol	7.23247	293.283	293.284	C20H38O2	Diterpenoids	MCHQEVJMCLOQAZ-AKMRJOLWSA-N	CC(CCO)CCC1[C@](C)(O)CCC2C(C)(C)CCCC12C	2.42086	100	28.5721
NCGC00385245-01!(2E,4E,14E)-15-(1,3-benzodioxol-5-yl)-N-(2-methylpropyl)pentadeca-2,4,14-trienamide [IIN-based on: CCMSLIB00000848860]	7.23247	434.273	434.267	C26H37NO3	Benzodioxoles	DRMOIHOBUYFDKF-HMZUNPFJSA-N	CC(C)CNC(=O)\\C=C\\C=C\\CCCCCCCC\\C=C\\C1=CC2=C(OCO2)C=C1	15.0368	99.2	23.8015
NCGC00385398-01!2-hydroxy-2-(2-methoxy-2-oxoethyl)butanedioic acid [IIN-based on: CCMSLIB00000848116]	21.1693	435.07	435.075	C7H10O7	Tricarboxylic acids and derivatives	YUTUUOJFXIMELV-UHFFFAOYSA-N	COC(=O)CC(O)(CC(O)=O)C(O)=O	10.8487	99.6	71.6768
NCGC00385536-01!(2E,4E)-N-(1,3-dihydroxy-3-methylpentan-2-yl)-2-methylhexa-2,4-dienamide [IIN-based: Match]	3.9176	224.165	224.165	C13H23NO3	Tertiary alcohols	PHCDULUANYZTRK-RMTFUQJTSA-N	CCC(C)(O)C(CO)NC(=O)C(\\C)=C\\C=C\\C	3.0781	100	20.0708
NCGC00385634-01_C16H22O9_beta-D-Glucopyranoside, 2-(1,3-benzodioxol-5-yl)-3-hydroxypropyl	14.5803	381.117	381.116	C16H22O9	O-glycosyl compounds	YQZGDKAOATWZIG-YLHHEPAUSA-N	OCC(CO[C@@H]1O[C@H](CO)[C@@H](O)[C@H](O)[C@H]1O)C2=CC3=C(OCO3)C=C2	4.72298	99.9	21.4716
NCGC00385777-01_C19H32O8_(2R)-4-[(1S)-1-Hydroxy-2,6,6-trimethyl-4-oxo-2-cyclohexen-1-yl]-2-butanyl beta-D-glucopyranoside	7.2416	389.217	389.217	C19H32O8	Fatty acyl glycosides of mono- and disaccharides	CZYPGTRKJFYXLT-SUHXYMONSA-N	C[C@H](CC[C@@]1(O)\C(=C/C(=O)CC1(C)C)C)O[C@@H]2O[C@H](CO)[C@@H](O)[C@H](O)[C@H]2O	0.0513852	100	22.6529
NCGC00385844-01_C15H28O2_7-(2-Hydroxy-2-propanyl)-1,4a-dimethyldecahydro-1-naphthalenol	6.9272	223.204	223.206	C15H28O2	Eudesmane, isoeudesmane or cycloeudesmane sesquiterpenoids	LKKDASYGWYYFIK-UHFFFAOYSA-N	CC(C)(O)C1CCC2(C)CCCC(C)(O)C2C1	7.34748	99.9	21.222
NCGC00385992-01_C21H29NO_1-Methyl-2-[(6Z)-6-undecen-1-yl]-4(1H)-quinolinone	3.86593	334.213	334.214	C21H29NO	Hydroquinolones	ILAQTUNYLVMXNW-SREVYHEPSA-N	CCCC\C=C/CCCCCC/1=C/C(=O)C2=CC=CC=C2N1C	4.00941	100	103.695
N-coronafacoyl-L-isoleucine	2.30977	322.205	322.201	C18H27NO4	Isoleucine and derivatives	RKSQYDBORLFRPF-UHFFFAOYSA-N	CCC(C)C(NC(=O)C1=CC(CC)CC2C1CCC2=O)C(O)=O	11.5145	99.7	136.059
N-Cyclohexylformamide	12.7612	128.105	128.107	C7H13NO	Secondary carboxylic acid amides	SWGXDLRCJNEEGZ-UHFFFAOYSA-N	OC=NC1CCCCC1	13.1921	99.9	26.4219
Nephrosteranic acid	13.984	316.246	316.248	C17H30O4	Gamma butyrolactones	PKXAQFKGSXYQJX-YMAMQOFZSA-N	CCCCCCCCCCCC1[C@H](C(=O)O)C(C)C(=O)O1	6.1028	99.9	71.5778
NEPSILON,NEPSILON,NEPSILON-TRIMETHYLLYSINE	3.78512	189.163	189.16	C9H20N2O2	L-alpha-amino acids	MXNRLFUSFKVQSK-QMMMGPOBSA-N	C[N+](C)(C)CCCC[C@@H](C(=O)[O-])N	15.0138	99.8	22.6452
N-formylglaucine	21.3917	370.17	370.165	C21H23NO5	Aporphines	ZDVIYLFBYWWBHH-HNNXBMFYSA-N	[H][C@]1(CC2=C3C=C(OC)C(OC)=C2)C4=C3C(OC)=C(OC)C=C4CCN1C([H])=O	12.7241	99.6	55.6119
N-Fructosyl isoleucine; PlaSMA ID-1287	19.0216	276.145	276.144	C12H23NO7	N-Fructosyl amino acids	VYGRYVGDPYFVCA-UHFFFAOYNA-N	O=C(O)C(NCC1(O)(OC(CO)C(O)C1(O)))C(C)CC	2.17278	100	85.8954
N-Isovalerylglycine	17.9091	160.096	160.097	C7H13NO3	N-acyl-alpha amino acids	ZRQXMKMBBMNNQC-UHFFFAOYSA-N	O=C(O)CN=C(O)CC(C)C	5.74652	100	1584.92
N-Methyldodecylamine	12.6206	200.238	200.237	C13H29N	Dialkylamines	OMEMQVZNTDHENJ-UHFFFAOYSA-N	CCCCCCCCCCCCNC	3.64567	100	37.6032
N-Methylthreonine	19.0765	134.079	134.081	C5H11NO3	L-alpha-amino acids	CCAIIPMIAFGKSI-DMTCNVIQSA-N	O=C(O)C(NC)C(O)C	14.0214	99.9	228.69
NNEI 2'-naphthyl isomer 30 NCE	7.27713	357.192	357.196	C24H24N2O	Indolecarboxamides and derivatives	LKGPFICOQRIBQC-UHFFFAOYSA-N	O=C(NC1=CC(C=CC=C2)=C2C=C1)C3=CN(CCCCC)C4=C3C=CC=C4	12.7101	99.6	21.6575
N-Nitrosodibutylamine (NDBA)	18.0239	159.148	159.149	C8H18N2O	Organic N-nitroso compounds	YGJHZCLPZAZIHH-UHFFFAOYSA-N	O=NN(CCCC)CCCC	8.1056	100	105.22
N-Oleoylethanolamine	3.72543	326.302	326.305	C20H39NO2	N-acylethanolamines	BOWVQLFMWHZBEF-MDZDMXLPSA-N	CCCCCCCCC=CCCCCCCCC(=O)NCCO	9.07126	99.8	23.4683
nonylphenazolone	10.692	300.201	300.196	C19H25NO2	Alpha amino acids and derivatives	PQFDQAVNOYPOPD-ICFOKQHNSA-N	O=C1/C(N=C(CCCCCCCCC)O1)=C/C2=CC=CC=C2	17.322	99.5	34.9802
norambreinolide	8.16902	251.196	251.2	C16H26O2	Naphthofurans	IMKJGXCIJJXALX-SHUKQUCYSA-N	O=C1OC2(C)CCC3C(C)(C)CCCC3(C)C2C1	16.3217	99.7	131.749
Nortriptyline	20.5246	264.172	264.175	C19H21N	Dibenzocycloheptenes	PHVGLTMQBUFIQQ-UHFFFAOYSA-N	CNCCC=C1C2=CC=CC=C2CCC3=CC=CC=C31	10.9019	99.8	2198.48
Octopamine, N-p-coumaroyl-	18.8118	322.099	322.1	C17H17NO4	Styrenes	VATOSFCFMOPAHX-XCVCLJGOSA-N	O=C(C=CC1=CC=C(O)C=C1)NCC(O)C2=CC=C(O)C=C2	3.13567	100	23.0521
Octylamine	13.3578	130.158	130.159	C8H19N	Monoalkylamines	IOQPZZOEVPZRBK-UHFFFAOYSA-N	CCCCCCCCN	7.14511	100	32.288
OLEATE	7.2126	283.262	283.263	C18H34O2	Long-chain fatty acids	ZQPPMHVWECSIRJ-KTKRTIGZSA-N	CCCCCCCC/C=C\CCCCCCCC(=O)O	3.35377	100	81.8841
Oleoyl-L-Carnitine	12.5833	426.353	426.358	C25H47NO4	Acyl carnitines	IPOLTUVFXFHAHI-WHIOSMTNSA-N	CCCCCCCC/C=C\CCCCCCCC(=O)O[C@H](CC(=O)[O-])C[N+](C)(C)C	10.5311	99.6	21.0989
OMEGA-HYDROXYDODECANOATE	7.22073	181.155	181.159	C12H24O3	Medium-chain hydroxy acids and derivatives	ZDHCZVWCTKTBRY-UHFFFAOYSA-N	OCCCCCCCCCCCC(O)=O	19.2649	99.8	25.5513
Oseltamivir acid	18.7191	285.177	285.181	C14H24N2O4	Gamma amino acids and derivatives	NENPYTRHICXVCS-YNEHKIRRSA-N	CCC(CC)OC(C=1)C(NC(C)=O)C(N)CC(C(O)=O)1	12.2028	99.8	108.291
PAEDEROSIDE	15.3546	485.05	485.051	C18H22O11S	O-glycosyl compounds	OJISWUQNQQWEND-FCVLBCLDSA-N	O=C(OCC1=CC2OC(=O)C3=COC(OC4OC(CO)C(O)C(O)C4O)C1C32)SC	2.72136	100	32.3952
Palmitoylcarnitine cation	12.3814	400.344	400.342	C23H45NO4	Acyl carnitines	XOMRRQXKHMYMOC-UHFFFAOYSA-N	O=C([O-])CC(OC(=O)CCCCCCCCCCCCCCC)C[N+](C)(C)C	3.67186	100	88.8547
Panthenol	18.2897	206.136	206.139	C9H19NO4	N-acyl amines	SNPLKNRPJHDVJA-ZETCQYMHSA-N	OC(=NCCCO)C(O)C(C)(C)CO	14.9899	99.8	108.61
Pantothenic acid; CE0; GHOKWGTUZJEAQD-UHFFFAOYSA-N	17.7336	220.116	220.118	C9H17NO5	Secondary alcohols	GHOKWGTUZJEAQD-UHFFFAOYSA-N	CC(C)(CO)C(C(=NCCC(=O)O)O)O	7.95028	99.9	23.9436
Patulin	15.4093	172.061	172.06	C7H6O4	Pyrans	ZRWPUFFVAOMMNM-UHFFFAOYSA-N	O=C1OC2=CCOC(O)C2=C1	3.25467	100	54.8308
Pelletierine Hydrochloride	18.4367	216.053	216.055	C8H16ClNO	Piperidines	FMOKUKPRJSMPOI-UHFFFAOYSA-N	Cl.O=C(C)CC1NCCCC1	9.67345	99.9	28.3556
Pentaethylene glycol	9.84275	239.148	239.149	C10H22O6	Polyethylene glycols	JLFNLZLINWHATN-UHFFFAOYSA-N	OCCOCCOCCOCCOCCO	3.38701	100	21.4948
Pergolide	18.7469	315.185	315.189	C19H26N2S	Indoloquinolines	YEHCICAEULNIGD-MZMPZRCHSA-N	S(C)CC1CN(CCC)C2CC3=CNC4=CC=CC(=C43)C2C1	13.7378	99.6	89.2539
Pesticide1_Monocrotophos_C7H14NO5P_Dimethyl (2E)-4-(methylamino)-4-oxo-2-buten-2-yl phosphate	22.2431	246.052	246.05	C7H14NO5P	Dialkyl phosphates	KRTSDMXIXPKRQR-AATRIKPKSA-N	CC(=CC(=O)NC)OP(=O)(OC)OC	8.98191	99.9	40.0327
Pesticide3_Forchlorfenuron_C12H10ClN3O_Urea, N-(2-chloro-4-pyridinyl)-N'-phenyl-	14.2896	248.056	248.059	C12H10ClN3O	2-halopyridines	GPXLRLUVLMHHIK-UHFFFAOYSA-N	C1=CC=C(C=C1)NC(=O)NC2=CC(=NC=C2)Cl	8.54637	99.9	20.9734
Pesticide3_Pirimicarb_C11H18N4O2_2-(Dimethylamino)-5,6-dimethyl-4-pyrimidinyl dimethylcarbamate	9.82868	261.132	261.132	C11H18N4O2	Dialkylarylamines	YFGYUFNIOHWBOB-UHFFFAOYSA-N	CC1=C(N=C(N=C1OC(=O)N(C)C)N(C)C)C	2.68063	100	52.446
Pesticide4_Chlorantraniliprole_C18H14BrCl2N5O2_3-Bromo-N-[4-chloro-2-methyl-6-(methylcarbamoyl)phenyl]-1-(3-chloropyridin-2-yl)-1H-pyrazole-5-carboxamide	14.5983	503.969	503.96	C18H14BrCl2N5O2	Pyrazolylpyridines	PSOVNZZNOMJUBI-UHFFFAOYSA-N	CC1=C(C(=CC(=C1)Cl)C(=O)NC)NC(=O)C2=CC(=NN2C3=C(C=CC=N3)Cl)Br	17.0252	98.6	194.783
Pesticide4_Oxadixyl_C14H18N2O4_	9.91288	301.117	301.116	C14H18N2O4	Anilides	UWVQIROCRJWDKL-UHFFFAOYSA-N	CC1=C(C(=CC=C1)C)N(C(=O)COC)N2CCOC2=O	2.39111	100	22.5682
Pesticide7_Spiromesifen_C23H30O4_2-Oxo-3-(2,4,6-trimethylphenyl)-1-oxaspiro[4.4]non-3-en-4-yl 3,3-dimethylbutanoate	12.0729	388.251	388.248	C23H30O4	Fatty acid esters	GOLXNESZZPUPJE-UHFFFAOYSA-N	CC1=CC(=C(C(=C1)C)C2=C(C3(CCCC3)OC2=O)OC(=O)CC(C)(C)C)C	7.64975	99.8	22.295
PHENYLETHANOLAMINE	13.9918	138.091	138.091	C8H11NO	Aralkylamines	ULSIYEODSMZIPX-UHFFFAOYSA-N	C1=CC=C(C=C1)C(CN)O	1.01382	100	241.028
phenylethylamide 275	4.33913	276.232	276.232	C18H29NO	N-acyl amines	XDDJYYVXLXUTSA-UHFFFAOYSA-N	O=C(CCCCCCCCC)NCCC1=CC=CC=C1	1.73767	100	32.8523
Phenylglycine; PlaSMA ID-237	18.8585	152.072	152.071	C8H9NO2	Amino acids	ZGUNAGUHMKGQNY-UHFFFAOYNA-N	O=C(O)C(N)C1=CC=CC=C1	2.63035	100	299.397
Phomalone	9.84853	277.104	277.105	C13H18O5	Alkyl-phenylketones	PTBQWWHUOMDVFS-UHFFFAOYSA-N	O=C(C1=C(O)C(=C(O)C=C1OC)CCO)CCC	1.58785	100	20.1426
Phosphatidylethanolamine (16:0/18:2) Abbr: PLPE	7.77573	738.514	738.504	C39H74NO8P	Phosphatidylethanolamines	HBZNVZIRJWODIB-NHCUFCNUSA-N	O=C(OCC(OC(=O)CCCCCCCC=CCC=CCCCCC)COP(=O)(O)OCCN)CCCCCCCCCCCCCCC	13.595	98	20.8486
Phosphotyrosine	21.2323	262.047	262.047	C9H12NO6P	Phenylalanine and derivatives	DCWXELXMIBXGTH-UHFFFAOYSA-N	O=C(O)C(N)CC1=CC=C(OP(=O)(O)O)C=C1	0.343449	100	288.812
Phytosphingosine-1-P	7.23247	420.249	420.249	C18H40NO6P	Phosphosphingolipids	AYGOSKULTISFCW-KZNAEPCWSA-N	CCCCCCCCCCCCCC[C@H]([C@@H]([C@@H](COP(=O)(O)O)N)O)O	2.04641	100	33.6717
PIPECOLATE	18.8431	152.067	152.068	C6H11NO2	Alpha amino acids	HXEACLLIILLPRG-YFKPBYRVSA-N	OC(=O)[C@@H]1CCCCN1	5.98416	100	53.7357
p-methoxycinnamic acid ethyl ester	7.38842	207.099	207.1	C12H14O3	Cinnamic acid esters	DHNGCHLFKUPGPX-RMKNXTFCSA-N	O=C(OCC)C=CC1=CC=C(OC)C=C1	2.94544	100	50.1883
Prenyletin	7.36492	264.121	264.123	C14H14O4	Hydroxycoumarins	AWEFUQDNSBBNCR-UHFFFAOYSA-N	O=C1OC=2C=C(OCC=C(C)C)C(O)=CC2C=C1	7.76153	99.9	25.7819
Pristimerin derivative	20.0146	463.28	463.284	C30H38O4	Methyl esters	LQQBKDRWDYGCBI-RKHSXEAASA-N	O=C1C(O)=C(C)C2=CC=C([C@](C=C[C@]3(C)C4C[C@](C)(C(OC)=O)CC3)(C)[C@@]4(C)CC5)[C@]5(C)C2=C1	8.7851	99.7	26.0118
Probenecid (Benemid)	12.5081	286.111	286.111	C13H19NO4S	Benzenesulfonamides	DBABZHXKTCFAPX-UHFFFAOYSA-N	C1=C(C=CC(=C1)C(=O)O)S(N(CCC)CCC)(=O)=O	0.524273	100	21.0537
Procymidone	21.1271	284.029	284.024	C13H11Cl2NO2	Phenylpiperidines	QXJKBPAVAHBARF-UHFFFAOYSA-N	CC12CC1(C)C(=O)N(C2=O)c1cc(Cl)cc(Cl)c1	16.6887	99.6	21.3184
Proline betaine; CE0; CMUNUTVVOOHQPW-LURJTMIESA-N	18.8378	144.103	144.102	C7H13NO2	Proline and derivatives	CMUNUTVVOOHQPW-LURJTMIESA-N	C[N+]1(C)CCC[C@H]1C(=O)[O-]	9.64595	100	6562.93
Prosulfocarb	21.1039	252.144	252.142	C14H21NOS	Benzene and substituted derivatives	NQLVQOSNDJXLKG-UHFFFAOYSA-N	CCCN(CCC)C(=O)SCc1ccccc1	8.88389	99.9	118.145
protopanaxadiol	4.398	483.376	483.38	C30H52O3	Triterpenoids	PYXFVCFISTUSOO-DUQNUXOISA-N	OC1CC2C3(C)CCC(O)C(C)(C)C3CCC2(C)C4(C)CCC(C14)C(O)(C)CCC=C(C)C	8.27506	99.7	26.0465
Purine riboside	15.9829	253.094	253.093	C10H12N4O4	Purine nucleosides	MRWXACSTFXYYMV-FDDDBJFASA-N	OC[C@@H](O1)[C@@H](O)[C@@H](O)[C@@H]1n(c2)c(n3)c(cnc3)n2	1.89654	100	129.197
Pyrantel; CE0; YSAUAVHXTIETRK-AATRIKPKSA-N	15.3325	207.094	207.095	C11H14N2S	Hydropyrimidines	YSAUAVHXTIETRK-AATRIKPKSA-N	CN1CCCN=C1/C=C/c1cccs1	3.18694	100	21.3719
PYRIDOXAL	15.5099	168.065	168.066	C8H9NO3	Pyridoxals and derivatives	RADKZDMFGJYCBB-UHFFFAOYSA-N	CC1=NC=C(C(=C1O)C=O)CO	1.30901	100	291.765
PYRIDOXINE	19.7252	187.104	187.108	C8H11NO3	Pyridoxines	LXNHXLLTXMVWPM-UHFFFAOYSA-N	OC=1C(=NC=C(C1CO)CO)C	18.7592	99.7	377.091
Pyrrolidine; CE0; RWRDLPDLKQPQOW-UHFFFAOYSA-N	16.8945	72.0801	72.0808	C4H9N	Pyrrolidines	RWRDLPDLKQPQOW-UHFFFAOYSA-N	C1CCNC1	9.01766	100	148.98
Quebrachitol	7.60192	233.042	233.042	C7H14O6	Cyclohexanols	DSCFFEYYQKSRSV-UHFFFAOYSA-N	OC1C(O)C(O)C(OC)C(O)C1O	2.10262	100	37.7433
quercetin 3-O-glucuronide	14.5714	501.064	501.064	C21H18O13	Flavonoid-3-O-glucuronides	DUBCCGAQYVUYEU-ZUGPOPFOSA-N	O=C(O)C1OC(OC=2C(=O)C=3C(O)=CC(O)=CC3OC2C=4C=CC(O)=C(O)C4)C(O)C(O)C1O	0.319321	100	413.149
quinmerac	21.1539	222.027	222.032	C11H8ClNO2	Quinoline carboxylic acids	ALZOLUNSQWINIR-UHFFFAOYSA-N	CC1=CC2=C(N=C1)C(C(O)=O)=C(Cl)C=C2	19.0513	99.6	20.5312
Rhodocladonic Acid	9.9374	336.07	336.071	C15H10O8	Naphthofurans	XKWWCTISHMFHJB-UHFFFAOYSA-N	O=C1C(=O)C=2C(O)=C3C(O)=C(OC3=CC2C(O)=C1OC)C(=O)C	4.40383	100	47.8154
RICININE	21.2323	182.092	182.092	C8H8N2O2	3-pyridinecarbonitriles	PETSAYFQSGAEQY-UHFFFAOYSA-N	N#CC1=C(OC)C=CN(C1=O)C	4.44829	100	63.6632
Roccellic Acid_major	18.1424	323.216	323.219	C17H32O4	Long-chain fatty acids	CADNMISJDLVPCK-LSDHHAIUSA-N	CCCCCCCCCCCCC(C(=O)O)C(C)C(=O)O	10.4264	99.8	25.6929
roemerine	20.5592	302.124	302.12	C18H17NO2	Aporphines	JCTYWRARKVGOBK-CQSZACIVSA-N	O1C=2C=C3C4=C(C2OC1)C5=CC=CC=C5CC4N(C)CC3	13.9018	99.6	365.245
Rosmanol	18.1427	345.2	345.2	C20H26O5	Diterpene lactones	LCAZOMIGFDQMNC-FORWCCJISA-N	O=C1OC2C(O)C3=CC(=C(O)C(O)=C3C14CCCC(C)(C)C24)C(C)C	0.0289687	100	55.6073
ROTENONIC ACID, METHYL ETHER	8.3111	449.13	449.136	C24H26O6	Rotenones	QADCCYSYLNTZHV-YADHBBJMSA-N	O=C1C2=CC=C(OC)C(=C2OC3COC4=CC(OC)=C(OC)C=C4C13)CC=C(C)C	12.4239	99.4	20.37
S4:17(P3:15/F1:2)	3.15907	654.328	654.333	C29H48O15	Saccharolipids	AKPIJPQIDBGCGR-UHFFFAOYSA-N	CCCCC(=O)OC1C(CO)OC(OC2(CO)OC(CO)C(OC(C)=O)C2O)C(OC(=O)CCCC)C1OC(=O)CCCC	7.53439	99.7	58.5242
SH373-1	18.4264	374.224	374.229	C17H31N3O6	Peptides	UKFUHWPKKCYCQR-UHFFFAOYSA-N	O=C(O)C(N=C(O)C(N=C(O)CCC(N)C(=O)O)C(C)CC)CC(C)C	11.1696	99.6	129.958
Shikimic Acid	16.6536	192.084	192.087	C7H10O5	Shikimic acids and derivatves	JXOHGGNKMLTUBP-HSUXUTPPSA-N	O=C(O)C1=CC(O)C(O)C(O)C1	15.8783	99.8	79.9507
Sinomenine hydrochloride	11.3851	388.128	388.13	C19H24ClNO4	Morphinans	YMEVIMJAUHZFMW-VUIDNZEBSA-N	Cl.O=C1C(OC)=CC2C3N(C)CCC2(C4=C(O)C(OC)=CC=C4C3)C1	5.15291	99.9	57.6411
Soyasapogenol B	4.41928	481.362	481.36	C30H50O3	Triterpenoids	YOQAQNKGFOLRGT-UXXABWCISA-N	OCC1(C)C(O)CCC2(C)C3CC=C4C5CC(C)(C)CC(O)C5(C)CCC4(C)C3(C)CCC12	3.55243	99.9	52.8141
SPI_270.2429_14.9	3.88562	270.242	270.243	C16H31NO2	Ketals	YYICKHZBDGQJBW-UHFFFAOYSA-N	CCCNCC1COC2(CCC(CC2)C(C)(C)C)O1	1.73918	100	40.0007
Spirostane -2H, + 1O, O-Pen-dHex; PlaSMA ID-3194	8.06512	709.427	709.425	C38H60O12	Steroidal saponins	SKHJNNFXCKTDBG-UHFFFAOYNA-N	OC8CC5=CCC4C(CCC3(C)(C4(CC2OC1(OCC(C)CC1)C(C)C23)))C5(C)C(OC7OCC(O)C(O)C7(OC6OC(C)C(O)C(O)C6(O)))C8	3.1293	99.9	28.9333
Spiroxamine	4.35803	298.272	298.274	C18H35NO2	Ketals	PUYXTUJWRLOUCW-UHFFFAOYSA-N	CCCN(CC)CC1COC2(CCC(CC2)C(C)(C)C)O1	6.87287	99.9	83.6948
Styrene	13.4508	105.068	105.07	C8H8	Styrenes	PPBRXRYQALVLMV-UHFFFAOYSA-N	C=CC=1C=CC=CC1	15.9894	99.9	33.5373
synephrine	7.58528	190.086	190.086	C9H13NO2	1-hydroxy-2-unsubstituted benzenoids	YRCWQPVGYLYSOX-UHFFFAOYSA-N	OC1=CC=C(C=C1)C(O)CNC	0.526078	100	21.8115
Tacrine	21.4789	199.124	199.123	C13H14N2	Acridines	YLJREFDVOIBQDA-UHFFFAOYSA-N	N=C1C=2C=CC=CC2NC3=C1CCCC3	3.16387	100	50.3224
Taurine	14.5714	126.022	126.022	C2H7NO3S	Organosulfonic acids	XOAAWQZATWQOTB-UHFFFAOYSA-N	C(CS(=O)(=O)O)N	0.476108	100	598.765
tetradec-5-ynoic acid	19.5331	247.165	247.167	C14H24O2	Long-chain fatty acids	RHOQRBVFJSAQTR-UHFFFAOYSA-N	O=C(O)CCCC#CCCCCCCCC	6.27107	100	23.5274
Tetradecanoyl-L-Carnitine	13.029	372.312	372.311	C21H41NO4	Acyl carnitines	PSHXNVGSVNEJBD-LJQANCHMSA-N	CCCCCCCCCCCCCC(=O)O[C@H](CC(=O)[O-])C[N+](C)(C)C	1.82643	100	26.1956
Theophylline	12.2813	203.05	203.05	C7H8N4O2	Xanthines	ZFXYFBGIUFBOJW-UHFFFAOYSA-N	O=C1C=2NC=NC2N(C(=O)N1C)C	0.984979	100	267.785
Threonine conjugated chenodeoxycholic acid	7.25328	494.344	494.348	C28H47NO6	Glycinated bile acids and derivatives	FDLBWFQZCBIUPV-JPWRXKRQSA-N	C[C@H](CCC(N[C@@H]([C@@H](C)O)C(O)=O)=O)[C@H]1CC[C@@]2([H])[C@]3([H])[C@H](O)C[C@]4([H])C[C@H](O)CC[C@]4(C)[C@H]3CC[C@@]21C	6.53386	99.8	26.0857
Threonylleucine (isomer of 925, 926); PlaSMA ID-926	21.8853	233.148	233.149	C10H20N2O4	Dipeptides	BQBCIBCLXBKYHW-UHFFFAOYNA-N	O=C(O)C(NC(=O)C(N)C(O)C)CC(C)C	3.00238	100	109.011
THYMIDINE-MONOPHOSPHATE	11.4529	345.051	345.046	C10H15N2O8P	Pyrimidine 2'-deoxyribonucleoside monophosphates	GYOZYWVXFNDGLU-XLPZGREQSA-N	CC1=CN([C@H]2C[C@H](O)[C@@H](COP(O)(O)=O)O2)C(=O)NC1=O	16.4036	99.4	25.3943
Tjipanazole B	8.21278	457.072	457.072	C23H18Cl2N2O4	Indolocarbazoles	JEOAJYYDZYNEAH-YJSIEXFISA-N	ClC1=CC2=C(N([C@@H]3OC[C@@H](O)[C@H](O)[C@H]3O)C4=C2C=CC5=C4NC6=C5C=C(Cl)C=C6)C=C1	1.9253	100	24.9213
Tobramycin 2 -N- or 6 -N-carbamoyl	18.4489	511.271	511.272	C19H38N6O10	4,6-disubstituted 2-deoxystreptamines	BXUDMXDCTTUXLQ-PBSUHMDJSA-N	O[C@H]1[C@H](N)[C@@H](O)[C@@H](O[C@H]2[C@H](N)C[C@H](N)[C@@H](O[C@@H]3[C@H](N)C[C@H](O)[C@@H](CNC(N)=O)O3)[C@@H]2O)O[C@@H]1CO	1.99502	100	47.9019
Topiramate	18.7684	362.087	362.088	C12H21NO8S	Dioxolopyrans	KJADKKWYZYXHBB-XBWDGYHZSA-N	[C@H]12[C@H]([C@H]3[C@](OC1)(COS(N)(=O)=O)OC(O3)(C)C)OC(O2)(C)C	4.17026	100	28.1345
Trazodone	11.3997	372.157	372.159	C19H22ClN5O	Phenylpiperazines	PHLBKPHSAVXXEF-UHFFFAOYSA-N	O=C1N2C=CC=CC2=NN1CCCN3CCN(C=4C=CC=C(Cl)C4)CC3	3.41252	100	168.949
triacanthine	19.1505	204.13	204.13	C10H13N5	6-aminopurines	BEPGTHDUUROBHM-UHFFFAOYSA-N	N1=CN=C2C1=C(N=CN2CC=C(C)C)N	1.95954	100	429.543
TRIGONELLINE	15.9829	160.034	160.037	C7H7NO2	Alkaloids and derivatives	WWNNZCOKKKDOPX-UHFFFAOYSA-N	C[N+]1=CC(=CC=C1)C([O-])=O	15.6214	99.9	1138.8
TRIIODOTHYRONINE	17.0739	651.807	651.797	C15H12I3NO4	Phenylalanine and derivatives	HZCBWYNLGPIQRK-LBPRGKRZSA-N	C1=CC(=C(C=C1C[C@@H](C(=O)O)N)I)OC2=CC(=C(C(=C2)I)O)I	14.7285	98.9	55.0766
Trimethylamine?N-oxide	21.8904	76.0744	76.0757	C3H9NO	Trialkyl amine oxides	UYPYRKYUKCHHIB-UHFFFAOYSA-N	O=N(C)(C)C	16.6939	100	655.47
Trospium	7.27713	392.225	392.222	[C25H30NO3]+	Diphenylmethanes	OYYDSUSKLWTMMQ-UHFFFAOYSA-N	OC(C(=O)OC1CC2CCC(C1)[N+]21CCCC1)(C1=CC=CC=C1)C1=CC=CC=C1	6.83286	99.9	23.5991
Tyramine; PlaSMA ID-59	8.18145	121.064	121.064	C8H11NO	Amino acids	DZGWFCGJZKJUFP-UHFFFAOYSA-N	OC1=CC=C(C=C1)CCN	1.65201	100	25.7626
Uracil; CE0; ISAKRJDGNUQOIC-UHFFFAOYSA-N	6.1768	113.034	113.035	C4H4N2O2	Pyrimidones	ISAKRJDGNUQOIC-UHFFFAOYSA-N	c1cnc(nc1O)O	8.40451	100	31.5755
UROCANATE	7.28463	121.038	121.04	C6H6N2O2	Imidazolyl carboxylic acids and derivatives	LOIYMIARKYCTBW-OWOJBTEDSA-N	OC(=O)\C=C\C1=CNC=N1	16.854	99.9	20.8838
Uvarigrin	4.33097	609.518	609.51	C37H68O6	Annonaceous acetogenins	ADPAPZVYVYEBGS-UHFFFAOYSA-N	O=C1OC(C=C1CCCCCCCCCCCCC(O)CC(O)C2OC(CC2)C(O)CCCCCCCCCCCC)C	12.6167	98.8	20.7255
Valactamide C putative	4.49173	467.379	467.384	C27H50N2O4	Cyclic depsipeptides	LONBSPWPPNYRFU-UHFFFAOYSA-N	CC(C(NC1=O)C(NC(C(OC(CCC(C)CC(C)CC(C)CC1C)C)=O)C(C)CC)=O)C	10.5695	99.5	28.0754
Valine conjugated cholic acid	12.4344	472.342	472.342	C29H49NO6	Glycinated bile acids and derivatives	WVFDPCYTNIXGHI-YDGIAAFJSA-N	C[C@H](CCC(N[C@@H](C(C)C)C(O)=O)=O)[C@H]1CC[C@@]2([H])[C@]3([H])[C@H](O)C[C@]4([H])C[C@H](O)CC[C@]4(C)[C@H]3C[C@H](O)[C@@]21C	0.486935	100	20.0953
veratramine	12.6343	432.277	432.28	C27H39NO2	Fluorenes	MALFODICFSIXPO-AZAJSESZSA-N	OC1CC2=CCC3C4=CC=C(C(=C4CC3C2(C)CC1)C)C(C)C5NCC(C)CC5O	6.24595	99.9	41.5812
vitamine a acetate	7.07455	329.252	329.25	C22H32O2	Retinoids	QGNJRVVDBSJHIZ-QHLGVNSISA-N	O=C(OCC=C(C=CC=C(C=CC1=C(C)CCCC1(C)C)C)C)C	6.68185	99.9	32.2848
XANTHOSINE	10.3782	285.084	285.083	C10H12N4O6	Purine nucleosides	UBORTCNDUKBEOP-UUOKFMHZSA-N	C1=NC2=C(N1[C@H]3[C@@H]([C@@H]([C@H](O3)CO)O)O)NC(=O)NC2=O	1.92926	100	20.1237
Yersiniabactin	11.4529	482.124	482.124	C21H27N3O4S3	Alpha amino acids and derivatives	JHYVWAMMAMCUIR-VQNLDRKJSA-N	CC1(CSC(=N1)C(C)(C)C(C2CSC(N2)C3CSC(=N3)C4=CC=CC=C4O)O)C(=O)O	1.12004	100	21.9674
Zacopride	18.0395	310.135	310.132	C15H20ClN3O2	Aminophenyl ethers	FEROPKNOYKURCJ-UHFFFAOYSA-N	ClC1=CC(C(O)=NC2CN3CCC2CC3)=C(OC)C=C1N	11.6725	99.7	50.7589
